# Supplementary material for: Association between vitamin D supplementation or serum vitamin D level and susceptibility to SARS-CoV-2 infection or COVID-19 including clinical course, morbidity and mortality outcomes? A systematic review
Source: PubMed Central journal article supplement (PMC8166456; doi:10.1136/bmjopen-2020-043737), 2021-05-28
Supplement: bmjopen-2020-043737.draft_revisions.pdf [file bmjopen-2020-043737.draft_revisions.pdf]

# BMJ Open

BMJ Open is committed to open peer review. As part of this commitment we make the peer review history of every article we publish publicly available.

When an article is published we post the peer reviewers' comments and the authors' responses online. We also post the versions of the paper that were used during peer review. These are the versions that the peer review comments apply to.

The versions of the paper that follow are the versions that were submitted during the peer review process. They are not the versions of record or the final published versions. They should not be cited or distributed as the published version of this manuscript.

BMJ Open is an open access journal and the full, final, typeset and author-corrected version of record of the manuscript is available on our site with no access controls, subscription charges or pay-per-view fees (<http://bmjopen.bmj.com>).

If you have any questions on BMJ Open's open peer review process please email [info.bmjopen@bmj.com](mailto:info.bmjopen@bmj.com)

# BMJ Open

## Association between vitamin D supplementation or level and susceptibility to COVID-19 infection including clinical course, morbidity and mortality outcomes? A systematic review.

|                               |                                                                                                                                                                                                                                                                                                                                                                                                                                                                                                                                                                                                                                                                                                                                                                                                                                                                                                     |
|-------------------------------|-----------------------------------------------------------------------------------------------------------------------------------------------------------------------------------------------------------------------------------------------------------------------------------------------------------------------------------------------------------------------------------------------------------------------------------------------------------------------------------------------------------------------------------------------------------------------------------------------------------------------------------------------------------------------------------------------------------------------------------------------------------------------------------------------------------------------------------------------------------------------------------------------------|
| Journal:                      | <i>BMJ Open</i>                                                                                                                                                                                                                                                                                                                                                                                                                                                                                                                                                                                                                                                                                                                                                                                                                                                                                     |
| Manuscript ID                 | bmjopen-2020-043737                                                                                                                                                                                                                                                                                                                                                                                                                                                                                                                                                                                                                                                                                                                                                                                                                                                                                 |
| Article Type:                 | Original research                                                                                                                                                                                                                                                                                                                                                                                                                                                                                                                                                                                                                                                                                                                                                                                                                                                                                   |
| Date Submitted by the Author: | 13-Aug-2020                                                                                                                                                                                                                                                                                                                                                                                                                                                                                                                                                                                                                                                                                                                                                                                                                                                                                         |
| Complete List of Authors:     | Grove, Amy; Warwick Life Sciences, Division of Health Sciences, Warwick Medical School<br>Osokogu, Osemeke; University of Warwick, Warwick Medical School<br>Al-Khudairy, Lena; University of Warwick Warwick Medical School, Population, evidence and technology<br>Mehrabin, Amin; Warwick University , Warwick Medical School<br>Zanganeh, Mandana; University of Warwick, Warwick Medical School<br>Brown, Anna; University of Warwick, Warwick Medical School<br>Court, Rachel; University of Warwick, Health Sciences<br>Taylor-Phillips, Sian; University of Warwick, Warwick Medical School<br>Uthman, Olalekan; University of Warwick, Warwick-Centre for Applied Health Research (WCAHRD)<br>McCarthy, Noel; University of Warwick, Warwick Medical School<br>Kumar, Sudhesh; University of Warwick, Medical School<br>Clarke, Aileen; University of Warwick, Division of Health Sciences |
| Keywords:                     | COVID-19, Public health < INFECTIOUS DISEASES, NUTRITION & DIETETICS                                                                                                                                                                                                                                                                                                                                                                                                                                                                                                                                                                                                                                                                                                                                                                                                                                |
|                               |                                                                                                                                                                                                                                                                                                                                                                                                                                                                                                                                                                                                                                                                                                                                                                                                                                                                                                     |

SCHOLARONE™  
Manuscripts

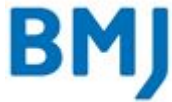

I, the Submitting Author has the right to grant and does grant on behalf of all authors of the Work (as defined in the below author licence), an exclusive licence and/or a non-exclusive licence for contributions from authors who are: i) UK Crown employees; ii) where BMJ has agreed a CC-BY licence shall apply, and/or iii) in accordance with the terms applicable for US Federal Government officers or employees acting as part of their official duties; on a worldwide, perpetual, irrevocable, royalty-free basis to BMJ Publishing Group Ltd ("BMJ") its licensees and where the relevant Journal is co-owned by BMJ to the co-owners of the Journal, to publish the Work in this journal and any other BMJ products and to exploit all rights, as set out in our [licence](#).

The Submitting Author accepts and understands that any supply made under these terms is made by BMJ to the Submitting Author unless you are acting as an employee on behalf of your employer or a postgraduate student of an affiliated institution which is paying any applicable article publishing charge ("APC") for Open Access articles. Where the Submitting Author wishes to make the Work available on an Open Access basis (and intends to pay the relevant APC), the terms of reuse of such Open Access shall be governed by a Creative Commons licence – details of these licences and which [Creative Commons](#) licence will apply to this Work are set out in our licence referred to above.

Other than as permitted in any relevant BMJ Author's Self Archiving Policies, I confirm this Work has not been accepted for publication elsewhere, is not being considered for publication elsewhere and does not duplicate material already published. I confirm all authors consent to publication of this Work and authorise the granting of this licence.

1  
2  
3 Title page  
4  
5

6 **Title**  
7

8  
9 Association between vitamin D supplementation or level and susceptibility to COVID-19  
10 infection including clinical course, morbidity and mortality outcomes? A systematic review.  
11  
12

13 **Author's names**  
14

15  
16 Amy Grove (0000-0002-8027-7274), Osemeke Osokogu, Lena Al-Khudairy, Amin Mehrabian,  
17 Mandana Zanganeh, Anna Brown, Rachel Court, Sian Taylor-Phillips, Olalekan Uthman, Noel  
18 McCarthy, Sudhesh Kumar, Aileen Clarke (0000-0001-8299-3146).<sup>1</sup>  
19  
20

21 **Address for each author**  
22

23 **Author's names and positions**  
24

25  
26 1) Warwick Medical School, University of Warwick, Coventry, CV4 7AL, UK  
27

28 Dr Amy Grove

29 Associate Professor of Health Technology Assessment and Implementation Science  
30  
31

32 Dr Osemeke Osokogu

33 Research Fellow  
34  
35

36 Dr Lena Al-Khudairy

37 Senior Research Fellow  
38  
39

40 Dr Mandana Zanganeh

41 Research Fellow  
42  
43

44 Mrs Anna Brown

45 Information Specialist  
46  
47

48 Mrs Rachel Court

49 Information Specialist  
50  
51

52 Professor Sian Taylor-Phillips

53 Professor of Population Health  
54  
55

56 Professor Olalekan Uthman

57 Professor of Evidence Synthesis  
58  
59  
60

1  
2  
3 Professor Noel McCarthy  
4 Professor of Public Health  
5

6  
7 Professor Sudhesh Kumar  
8 Dean of Medicine  
9

10  
11 Professor Aileen Clarke  
12 Professor of Public Health and Health Services Research  
13  
14

15  
16 2) Department of Pharmaceutical Nanotechnology, School of Pharmacy, Mashhad  
17 University of Medical Sciences, Mashhad, Iran  
18

19  
20 Mr Amin Mehrabian  
21 Research Fellow  
22

23  
24 **Corresponding Author**  
25

26  
27 Dr Amy Grove, Room A101, Division of Health Sciences, Warwick Medical School, University  
28 of Warwick, Coventry, CV4 7AL  
29 Email: A.L.Grove@warwick.ac.uk  
30  
31  
32  
33  
34  
35  
36  
37  
38  
39  
40  
41  
42  
43  
44  
45  
46  
47  
48  
49  
50  
51  
52  
53  
54  
55  
56  
57  
58  
59  
60

## Abstract

Objective: To systemically review and critically appraise published studies of the association between vitamin D supplementation or level and susceptibility to COVID-19 infection, including clinical course, morbidity and mortality outcomes.

Design: Systematic review.

Data sources: MEDLINE (OVID), Embase (OVID), Cochrane Central Register of Controlled Trials, MedRxiv and BioRxiv preprint databases. COVID-19 databases of the WHO, Cochrane, CEBM Oxford, and Bern University up to 10 June 2020.

Study selection: Studies which assessed Vitamin D supplementation and/or Low Serum Vitamin D in patients acutely ill with, or at risk of severe betacoronavirus infection [SARS-CoV, MERS-CoV, SARS-CoV-2].

Data extraction: Two authors independently extracted data using a predefined critical appraisal and data extraction form; risk of bias was assessed using the Downs and Black Quality Assessment Checklist.

Results: Searches elicited 449 papers, 59 studies were included at full text. There was very limited evidence on the association between vitamin D supplementation or level and susceptibility to COVID-19 infection. Four articles were included in a narrative synthesis including a retrospective cohort study (348,598 participants, 449 cases) in which univariable analysis showed that vitamin D protects against COVID-19; a cross-sectional study (n=107) suggesting an inverse association between serum vitamin D and COVID-19, a case-control survey (n=1486) showing cases with confirmed/probable COVID-19 reported lower vitamin D supplementation, and an ecological country level study demonstrating a negative correlation between vitamin D and COVID-19 case numbers and mortality. All studies were at high/unclear risk of bias.

Conclusion: There is limited evidence of a negative association between vitamin D and COVID-19 infection. There is no peer reviewed published evidence of association between Vitamin D levels and severity of symptoms or mortality due to COVID-19. Guideline producers should acknowledge that benefits of vitamin D supplementation in COVID-19 infection are yet unproven despite increasing interest from the media and academic community.

## Strengths and limitations of this study

- 1  
2  
3  
4  
5  
6  
7  
8  
9  
10  
11  
12  
13  
14  
15  
16  
17  
18  
19  
20  
21  
22  
23  
24  
25  
26  
27  
28  
29  
30  
31  
32  
33  
34  
35  
36  
37  
38  
39  
40  
41  
42  
43  
44  
45  
46  
47  
48  
49  
50  
51  
52  
53  
54  
55  
56  
57  
58  
59  
60
- Speculation exists on the relationship between vitamin D and susceptibility to COVID-19 or disease/treatment outcomes but this has not been proven.
  - This systematic review identified four relevant studies which were synthesised in a narrative synthesis; 1) a retrospective cohort study in which univariable analysis showed that vitamin D protects against COVID-19; 2) a cross-sectional evaluation which suggested an inverse association between serum vitamin D and COVID-19, 3) a survey where cases with confirmed/probable COVID-19 reported lower vitamin D supplementation, and 4) an ecological study which demonstrated a negative correlation between vitamin D and COVID-19.
  - Results demonstrate that age and ethnicity were associated with COVID-19 infection even after multivariable adjustment. Black and South Asian people had a much higher risk of confirmed COVID-19 compared to white people. However, there was no interaction between ethnicity and vitamin D deficiency. Overall, positive COVID-19 cases had lower serum vitamin D and reported lower vitamin D supplementation in comparison to negative cases.
  - Due to limitations of the evidence, it is not possible to conclude that vitamin D supplementation or level is associated with susceptibility to COVID-19, or its clinical course, morbidity or mortality.
  - The limitations of the study relate to the small amount of evidence available which was, moreover, at risk of bias. This limits the inferences that can be drawn. The review was restricted to English language only, therefore non English language papers may have been missed.

## Introduction

COVID-19, a novel viral infection caused by Severe Acute Respiratory Syndrome Coronavirus two (SARS-CoV-2) was declared a pandemic by The World Health Organization (WHO) on 11 March 2020.<sup>1</sup> Interest is mounting regarding the association of vitamin D supplementation or level with susceptibility to COVID-19 infection due to the recognised modulating effects of vitamin D on the immune system and immune response.

Vitamin D can modulate the immune system through highly expressed receptors in most non-skeletal tissues.<sup>2-3</sup> Two of the most common analogues of vitamin D in the human body are D<sub>2</sub> (ergocalciferol) and D<sub>3</sub> (cholecalciferol).<sup>4</sup> Both D<sub>2</sub> and D<sub>3</sub> can be hydroxylated by liver enzymes CYP2R1 and CYP27A1 to form calcidiol (25(OH)D). The active metabolite of vitamin D, calcitriol (1 $\alpha$ ,25(OH)<sub>2</sub>D), results from the action of CYP27B enzyme on calcidiol. CYP27B is found in several tissues including the kidney, skin, bones, and immune system.<sup>5-6</sup> Tumour necrosis factor  $\alpha$  (TNF  $\alpha$ ) and interferon (IFN $\gamma$ ) are examples of inflammatory cytokines that stimulate the CYP27B enzymes of the immune system.<sup>7-17</sup> Vitamin D can interact with both the innate and cellular immune systems through these mechanisms.

Current Public Health England (PHE),<sup>18</sup> National Institutes of Health<sup>19</sup> and European Food Safety Authority<sup>20</sup> recommendations highlight the importance of vitamin D to population health. Vitamin D deficiency is defined as less than 25 nmol/L (10ng/ml) measured in blood serum.<sup>18</sup> Guideline recommendations suggest that people take a supplement of 10 micrograms of vitamin D per day during the winter months or throughout the year if they do not spend time outdoors or if they cover the majority of their skin when outside.<sup>18</sup> Published editorials, commentaries<sup>21-26</sup> and news media reports<sup>27-29</sup> suggest that individuals with low blood serum concentrations of vitamin D might be at higher risk of infection with COVID-19, or upon infection have worse outcomes than individuals with normal/high serum vitamin D.<sup>30</sup>

Several observational studies have reported associations between low serum vitamin D and chronic<sup>31</sup> and acute conditions such as susceptibility to acute respiratory tract infections (RTI).<sup>32-34</sup> Most recently, Martineau and colleagues (2017) conducted a systematic review and meta-analysis of individual participant data from randomised controlled trials to assess the overall effect of vitamin D supplementation on risk of acute RTI.<sup>35</sup> They reported vitamin D supplementation to be safe while protecting against acute RTI overall (adjusted odds ratio 0.88, 95% confidence interval 0.81 to 0.96; P for heterogeneity <0.001). Patients very deficient in vitamin D benefited the most (adjusted odds ratio 0.75, 0.60 to 0.95; p for interaction=0.006).<sup>35</sup> Recent rapid reviews of vitamin D for treatment or prevention in COVID-19 reported no evidence that vitamin D deficiency predisposes to COVID-19, or that vitamin D supplementation is effective in prevention or treatment of COVID-19.<sup>36-37</sup> However, data sources included in the rapid review were limited.<sup>38</sup>



1  
2  
3 Mild COVID-19 infection may manifest as high temperature, a continuous cough and a loss of  
4 or change in sense of smell or taste.<sup>39 40</sup> However, more severe and critical cases can result in  
5 inflammation of the lungs, low oxygen levels and acute respiratory distress syndrome.<sup>41</sup> If  
6 vitamin D supplementation could influence the susceptibility of people to COVID-19 infection,  
7 the intervention could be cost-effective with few associated safety risks.<sup>35</sup> Therefore, it is  
8 timely to systematically review and critically appraise all peer reviewed published evidence  
9 to assess the association of vitamin D supplementation or level with susceptibility to COVID-  
10 19 infection including clinical course, morbidity and mortality outcomes.  
11  
12  
13  
14  
15  
16

## 17 **Methods**

### 18 Protocol registration

19  
20 The methods were prespecified in a protocol that was registered with the PROSPERO  
21 International Prospective Register of Systematic Reviews  
22 ([https://www.crd.york.ac.uk/prospero/display\\_record.php?ID=CRD42020182876](https://www.crd.york.ac.uk/prospero/display_record.php?ID=CRD42020182876)). Research  
23 ethics committee approval was not required for this study.  
24  
25  
26  
27

28 We undertook a systematic review to answer the following question: Is vitamin D  
29 supplementation or level associated with susceptibility to severe betacoronavirus infection  
30 (Severe Acute Respiratory Syndrome [SARS-CoV], Middle East Respiratory Syndrome  
31 [MERS-CoV], Severe Acute Respiratory Syndrome two [SARS-CoV-2]) including clinical course,  
32 morbidity and mortality outcomes?  
33  
34  
35

36  
37 Our review was conceptualised and written in accordance with the PRISMA statement.<sup>42</sup>  
38  
39

### 40 Data sources and search

41 The search strategy was developed by the information specialists in collaboration with the  
42 research team and clinical advisors. We searched MEDLINE (OVID interface), Embase (OVID  
43 interface), Cochrane Central Register of Controlled Trials, MedRxiv and BioRxiv preprint  
44 databases on 6<sup>th</sup>-8<sup>th</sup> May 2020. We searched the global research on COVID-19 developed by  
45 the WHO,<sup>43</sup> CEBM Oxford,<sup>44</sup> and the living systematic review developed by Bern University<sup>45</sup>  
46 on 10 May 2020. We updated the database searches on 10<sup>th</sup> June 2020 to capture articles  
47 which may have been published since the initial search was conducted.  
48  
49  
50

51  
52 We also searched for relevant systematic reviews in MEDLINE (OVID interface), Embase (OVID  
53 interface) and Cochrane Database of Systematic Reviews (19<sup>th</sup> May 2020), and assessed the  
54 reference lists of two systematic reviews identified as potentially relevant. In addition, we  
55 assessed the reference lists of 17 narrative reviews.<sup>24 25 30 46-59</sup> Finally, we identified one  
56 additional article through consultation with clinical experts.<sup>35</sup> Our full search record is  
57 included in the supplementary information.  
58  
59  
60

## Study eligibility

We developed pre-defined study eligibility criteria aligned to the research question (Table 1). We imposed a date restriction of January 2002, to capture all published articles since SARS-CoV was first discovered in Asia in February 2003.<sup>60</sup> We limited to English language only.

Table 1. Study eligibility criteria

| <i>Study eligibility criteria</i>                                                                                                                                                                                                                                                                                                                                                                                         |
|---------------------------------------------------------------------------------------------------------------------------------------------------------------------------------------------------------------------------------------------------------------------------------------------------------------------------------------------------------------------------------------------------------------------------|
| <p>P - Population</p> <ol style="list-style-type: none"> <li>1) Patients acutely ill with betacoronavirus infection [SARS-CoV, MERS-CoV, SARS-CoV-2]</li> <li>2) or at risk of acute illness with betacoronavirus infection</li> </ol>                                                                                                                                                                                    |
| <p>I - Intervention/exposure</p> <ol style="list-style-type: none"> <li>1) Vitamin D supplementation</li> <li>2) Low Serum vitamin D</li> </ol>                                                                                                                                                                                                                                                                           |
| <p>O - Outcomes</p> <ol style="list-style-type: none"> <li>1) Betacoronavirus infection (to include serological evidence of infection or clinically confirmed symptomatic infection);</li> <li>2) Severe betacoronavirus infection (to include patients admitted to hospital or admitted to intensive care); mortality due to betacoronavirus infection</li> <li>3) Mortality due to betacoronavirus infection</li> </ol> |
| <p>C – Comparators</p> <ol style="list-style-type: none"> <li>1) No vitamin D supplementation</li> <li>2) High or normal serum vitamin D</li> </ol>                                                                                                                                                                                                                                                                       |
| <p>S - Study design</p> <p>Peer reviewed publications of randomised controlled trials and non-randomised studies were eligible for inclusion; including, non randomised controlled trials, interrupted time series analyses, controlled before-and-after studies, cohort studies, ecological studies, case reports and case series.</p>                                                                                   |
| <p>Subgroups</p> <ol style="list-style-type: none"> <li>1. Ethnicity characteristics (White British, all other White, Mixed, Asian, Black, Other)</li> <li>2. Age characteristics (population by five-year age groups)</li> </ol>                                                                                                                                                                                         |

## Article selection

Following the article search, we systematically identified and removed any duplicate citations using EndNote X9 software. Using titles and abstracts, de-duplicated citations were screened by two independent reviewers and checked by a third. All articles deemed ineligible were excluded at this stage. We identified and obtained all remaining articles for full text screening, which was performed independently by at least two reviewers against the pre-specified eligibility criteria (Table 1). Where disagreements regarding the inclusion of articles arose, a third reviewer was consulted to reach a final decision.

### Data extraction

Two reviewers independently extracted data from eligible full-text papers using a prespecified data extraction form. The accuracy of all the data extraction was independently assessed by a third reviewer. Where reported, we sought to extract data from each article relevant to the research question, including details of population, intervention/exposure, comparator, outcomes and any detail related to the two pre-specified subgroups: ethnicity characteristics and age characteristics. Disagreements between reviewers were resolved by discussion and agreement, or via consultation with a third reviewer.

### Risk of bias

The included studies had observational study designs aimed at answering a specific question. Therefore, risk of bias of included full-text papers was assessed using the Downs and Black Quality Assessment Checklist.<sup>61</sup> Two reviewers independently assessed the risk of bias of the included studies and the accuracy of the assessment was evaluated by a third reviewer.

### Data analysis

We anticipated that identified studies would be too heterogeneous to facilitate pooling of study data and planned a narrative synthesis. Nevertheless, we intended to consider pooling outcomes data in a meta-analysis using a random-effects model if appropriate.

### Patient and public involvement

It was not possible to involve patients or the public in the design, conduct, or reporting of our research.

### Results

After searching databases and other sources, we identified 499 citations. Following removal of duplicates and screening of titles and abstracts, we retrieved 59 full-text papers of which four met the full eligibility criteria (see Figure 1). The electronic supplement includes characteristics of included studies, and a list of reasons for excluding studies at full text review. Seven articles met the eligibility criteria but were excluded as they were not available as peer reviewed publications at the time of our narrative synthesis, details of these seven studies<sup>62-68</sup> is provided in the electronic supplement.

<Insert Figure 1 here>

Figure 1. PRISMA flow diagram for the selection of studies

Risk of bias assessments demonstrate that all studies scored poorly across several domains of the Downs and Black Quality Assessment Checklist,<sup>61</sup> including external validity, internal validity and power. A prominent issue amongst the included studies was that the authors did

1  
2  
3 not perform adequate multivariable adjustment to correct for confounding.<sup>71 72 73</sup> Ecological  
4 bias was present in Ilie et al., 2020<sup>70</sup> which may result from spatial and temporal scale  
5 differences between country level mean levels of vitamin D. However, several domains in  
6 each risk of bias assessment were not applicable or not reported and therefore, could not be  
7 scored using the Downs and Black Quality Assessment Checklist.<sup>61</sup> The risk of bias scores are  
8 detailed in the electronic supplement. All four included studies were conducted in Europe and  
9 published in April or May 2020. One study was based on data from UK residents exclusively,<sup>69</sup>  
10 another included data on residents in 20 European countries, including the UK.<sup>70</sup>  
11  
12  
13  
14  
15

16 Hastie et al., 2020 is a retrospective cohort study that utilised data from the UK Biobank.<sup>71</sup> UK  
17 Biobank is a long-term follow-up study of about 500,000 participants originally recruited  
18 between 2006 and 2010 when they were between 37 and 73 years old.<sup>69</sup> For this study  
19 348,598 people with complete data on vitamin D and covariates were included; of which 449  
20 tested positive for COVID-19 infection. Of these 385 (85.8%) were White compared to 64  
21 (14.2%) non-white (Black, South Asian and others). Conversely, the 345,140 COVID-19  
22 negative participants included 331,464 (95.2%) White compared to 16,685 (4.8%) non-white.  
23 COVID-19 positive participants were older (Median = 49 years; Interquartile Range [IQR] = 40-  
24 58) than COVID-19 negative participants (Median = 49 years; IQR = 38 - 57) with p-value of  
25 <0.05. Multivariable analysis showed that age at assessment (OR = 1.02; 95% CI = 1.00 - 1.03;  
26 P= 0.016) and non-white ethnicity (Black OR = 4.30, 95% CI = 2.92 - 6.31, P= < 0.001; South  
27 Asian OR = 2.42, 95% CI = 1.50 - 3.93, P= <0.001) were associated with confirmed COVID-19  
28 infection. There was no significant interaction between ethnicity and vitamin D deficiency (OR  
29 = 0.90; 95% CI = 0.66 - 1.23; P= 0.515).  
30  
31  
32  
33  
34  
35  
36

37 Median vitamin D concentration at recruitment was lower in patients with subsequent  
38 confirmed COVID-19 infection (28.7 [IQR 10.0-43.8] nmol/l) than other participants (32.7 [IQR  
39 10.0-47.2] nmol/l) (P= <0.01). Although univariable analysis suggested an association  
40 between vitamin D and COVID-19 (OR=0.99; 95% CI 0.99 – 0.999; P=0.013), this association  
41 became insignificant (OR=1.00; 95% CI = 0.998-1.01; P=0.208) after adjustment for  
42 covariates.<sup>69</sup>  
43  
44  
45  
46

47 D'Avolio et al, 2020<sup>72</sup> is a cross-sectional study in which 25(OH)D levels were compared  
48 among three groups (the third group is not relevant for this review and therefore not  
49 presented) of participants from the Canton of Tessin, Switzerland. Data from participants that  
50 had a nasopharyngeal swab PCR analysis for COVID-19 and a 25(OH)D measurement were  
51 retrospectively evaluated. Group 1 comprised 27 patients with positive polymerase chain  
52 reaction (PCR) test results for COVID-19 while group 2 comprised 80 patients with a negative  
53 PCR result for COVID-19. Both groups had their 25(OH) D and COVID-19 status assessed  
54 between 1st March and 14th April 2020. Group 1 participants (median age = 74 years [IQR  
55 65–81]; male = 70.4%;) had significantly (P= 0.004) lower serum 25(OH)D levels (median = 11.1  
56 ng/mL [IQR 8.2–21.0]) than group 2 participants (median age = 73 years [IQR 61–82]; male =  
57  
58  
59  
60

1  
2  
3 48.8%; median 25(OH)D = 24.6 ng/mL [IQR 8.9–30.5]). Although gender and age stratified  
4 analysis showed no statistically overall significant differences, older (>70 years) group 1  
5 (COVID-19 test positive, n =18) participants had significantly ( $p = 0.037$ ) lower median serum  
6 25 (OH) D levels (9.3 ng/mL [IQR 8.1–19.9] than older group 2 (COVID-19 negative, n = 43)  
7 (23.1 ng/mL [IQR 8.5–31.7]).  
8  
9

10  
11 Fasano et al., 2020<sup>73</sup> is a case-control phone survey that investigated patients from one of  
12 the largest tertiary centres for Parkinson Disease in Lombardy, Italy. COVID-19 diagnosis was  
13 either “confirmed” using a nasopharyngeal swab or “probable” based on the following  
14 criteria: a) presence of persistent COVID-19-related symptoms ( $\geq 3$  including fever or  $\geq 5$   
15 without fever); or b)  $\geq 1$  symptom in presence of suggestive chest radiologic signs; and/or c)  
16 living with a family member with a confirmed diagnosis of COVID-19. A total of 1486  
17 participants were included in the survey (77.2% response rate, 32 confirmed COVID-19, 73  
18 probable COVID-19 and 1381 unaffected). Confirmed/probable COVID-19 cases (mean age =  
19 70.5 [Standard Deviation [SD] = 10.1]; male = 53%) reported a significantly lower intake of  
20 vitamin D supplementation (12.4%) compared to unaffected cases (22.9%; mean age = 73.0  
21 [SD = 9.5], male = 57%). The age-adjusted OR (OR 0.56 [95% CI = 0.32-0.99],  $P = 0.048$ )  
22 suggested a protective effect of vitamin D intake.  
23  
24  
25  
26  
27  
28  
29

30 Ilie et al., 2020<sup>70</sup> is an ecological study which used data reported from 20 European countries  
31 as at 8th April 2020; the data pertains to mean levels of vitamin D, cases of COVID-19 infection  
32 per million population and deaths from COVID-19 per million population. The authors  
33 performed Pearson Correlation Coefficient Calculations and reported a negative correlation  
34 between mean levels of vitamin D (Mean 56.79 nmol/l, SD 10.61) and number of cases of  
35 COVID-19 infection per million population in each country (Mean 1393.4, SD 1129.984,  $r(20)$   
36 =  $-0.44$ ;  $P = 0.05$ ). Ilie et al., 2020 also reported a negative correlation between mean vitamin  
37 D levels and the number of deaths caused by COVID-19 per million population in each country  
38 (Mean 80.42, SD 94.61,  $r(20) = -0.4378$ ;  $P = 0.05$ ). Sweden had the highest mean level of  
39 vitamin D (73.5 nmol/l) compared to Spain which had a mean level of 42.5 nmol/l). The  
40 number of cases of COVID-19 per million population was 834 in Sweden and 3,137 in Spain.  
41 Likewise, at the time of the study, there were 68 deaths from COVID-19 per million population  
42 in Sweden and 314 in Spain.  
43  
44  
45  
46  
47  
48  
49

50 We planned to perform subgroup analyses by age and ethnicity. According to Hastie et al.,  
51 2020<sup>69</sup> multivariable analysis showed that age at assessment (OR = 1.02; 95% CI = 1.00 - 1.03;  
52  $P = 0.016$ ) and non-white ethnicity (Black OR = 4.30, 95% CI = 2.92 - 6.31,  $P < 0.001$ ; South  
53 Asians OR = 2.42, 95% CI = 1.50 - 3.93,  $P < 0.001$ ) were associated with confirmed COVID-19  
54 infection. However, Hastie et al found no significant interaction between ethnicity and  
55 vitamin D deficiency (OR = 0.90; 95% CI = 0.66 - 1.23;  $P = 0.515$ ).  
56  
57  
58  
59

## 60 Discussion

1  
2  
3 This systematic review of non-randomised studies has shown limited evidence of an  
4 association between vitamin D and COVID-19 infection. We identified four studies for  
5 inclusion in a narrative synthesis. A univariable analysis of data from the UK Biobank database  
6 revealed an association between vitamin D and COVID-19 infection (OR=0.99; 95% CI 0.99 –  
7 0.999; P=0.013). However, this association became insignificant (OR=1.00; 95% CI=0.998-  
8 1.01; P=0.208) after adjustment for 13 other covariates. The second small evaluation  
9 suggested a significant inverse association between a positive PCR test and serum vitamin D  
10 levels. Older (>70 years) positive cases had lower serum levels in comparison to negative  
11 cases but this did not reach statistical significance. However, the findings are limited as the  
12 authors did not perform any multivariable adjustment to correct for confounding. The third  
13 study was a survey that suggested that patients with Parkinson Disease and a  
14 confirmed/probable COVID-19 diagnosis reported lower vitamin D supplementation in  
15 comparison to negative COVID-19 cases. In this study, the authors adjusted for only age which  
16 is a limitation. A fourth study using a design subject to ecological bias, reported a negative  
17 correlation between mean levels of vitamin D (mean 56.8 nmol/l, SD 10.6), and number of  
18 COVID-19 cases and number of COVID-19 deaths per 1 million persons across 20 European  
19 countries.  
20  
21  
22  
23  
24  
25  
26  
27

28 The fact that the initially identified association between vitamin D and COVID-19 infection  
29 found by Hastie et al., 2020 became insignificant after adjustment for covariates, suggests  
30 that the initial association was due to one or more confounding variables.<sup>69</sup> This view is  
31 further strengthened by the demonstration of highly significant associations between age and  
32 ethnic characteristics as predictor variables, and COVID-19 infection as the outcome variable.  
33 However, it should be noted that the UK Biobank data included only one measurement of  
34 Vitamin D levels for participants which was taken between 10 and 14 years prior to the  
35 outbreak of COVID-19.  
36  
37  
38  
39  
40

41 D'Avolio results suggested that older (>70 years) positive cases had lower serum levels in  
42 comparison to negative cases, however this did not reach statistical significance. Liu et al.,  
43 2020 concluded that patients over 60 years experienced more severe manifestations and had  
44 longer disease courses of COVID-19 compared to patients below 60 years.<sup>74</sup> Other studies  
45 have shown that older (rather than younger) people are more likely to die from COVID-19  
46 infection.<sup>75-78</sup> Although older persons have an increased likelihood of being vitamin D  
47 deficient and vitamin D is thought to protect against COVID-19 infection possibly via an  
48 immune-mediated pathway,<sup>79</sup> our review shows that age remained an independent predictor  
49 of COVID-19 infection even after adjusting for vitamin D levels. Further research is essential  
50 to better understand all the associated issues. Non-white people are known to be more  
51 susceptible to COVID-19 infection and tend to develop worse outcomes,<sup>80</sup> a finding that our  
52 review has further substantiated.<sup>69</sup>  
53  
54  
55  
56  
57  
58  
59  
60



1  
2  
3 Nevertheless, Hastie et al., 2020 did not find any interaction between ethnicity and vitamin D  
4 deficiency and although Ilie et al 2020<sup>70</sup> identified a relationship, the study is subject to  
5 ecological bias. Ethnicity is a multi-faceted construct that includes genetic make-up, socio-  
6 cultural identity and behavioural patterns.<sup>81</sup> Many studies have demonstrated significant  
7 differences in disease manifestations, based on complex ethnicity-related factors. An  
8 example is the impact of ethnic disparities on treatment outcomes in patients with  
9 tuberculosis.<sup>82-83</sup> Bime et al., 2016 reported that '*blacks, hispanics, and other racial minorities*  
10 *in the US were observed to exhibit significantly higher in-hospital sepsis-related respiratory*  
11 *failure associated mortality when compared with non-Hispanic whites*'.<sup>84</sup> Given the findings  
12 so far from our review and research to date we consider that a relationship between ethnicity,  
13 vitamin D (serum levels or supplementation) and susceptibility to or severity of COVID-19  
14 infection cannot yet be ruled out. In particular, there is paucity of data on vitamin D levels  
15 and morbidity and mortality from COVID-19 and there is no evidence from randomised clinical  
16 trials on outcomes of vitamin D supplementation on severity of symptoms or mortality so far.

17  
18 Risk of bias assessments demonstrate that all studies scored poorly across several domains  
19 of the Downs and Black Quality Assessment Checklist.<sup>61</sup> All studies were observational designs  
20 and therefore subject to confounding. Of the four included studies, Hastie et al., 2020<sup>69</sup>  
21 performed multivariable adjustment for many potential confounders whereas Fasano et al.,  
22 2020<sup>73</sup> only adjusted for only age and D'Avolio et al, 2020<sup>72</sup> did not report using multivariable  
23 adjustment to correct for confounders. Until more robust scientific evidence for vitamin D  
24 supplementation is available, there will be limited evidence to support greater  
25 supplementation (upper limit of 4000 IU/day (100 µg/day)) of vitamin D to reduce  
26 susceptibility to COVID-19 infection. More robust prognostic studies could be combined in a  
27 systematic review where a prognostic factor research question is phrased and considerations  
28 of participation, attrition, prognostic factor measurement, confounding measurement and  
29 account, outcome measurement, and analysis and reporting are evaluated. Thereby, fully  
30 assessing validity and bias of the included studies.

31  
32 The persistent calls for high-dose vitamin D supplementation<sup>85</sup> arise from speculation about  
33 presumed mechanisms. We have identified one study involving an '*unbiased screen of*  
34 *repurposed drugs for treatment of avian influenza A H5N1 virus using appropriate cell lines*  
35 *and mice, which highlighted calcitriol (the active hormone of vitamin D) as a potential*  
36 *therapy*'.<sup>86</sup> A second study involved '*a recent analysis of vitamin D and viral infections*'.<sup>87</sup>  
37 Publication of peer reviewed research specific to COVID-19 infection is required to identify  
38 the exact mechanisms involved in the human population. We are aware of two ongoing  
39 randomised clinical trials investigating the effects of vitamin D on COVID-19, the ZnD3-CoVici  
40 study, France (NCT04351490)<sup>88</sup> and the CoVitTrial, France (NCT04344041).<sup>89</sup> Both trials have  
41 an estimated study completion date of July 2020. Inclusion of data from these studies in  
42 future systematic review and meta-analyses may enable us to potentially draw better  
43 conclusions even for subgroup effects. Results from the ongoing international VITDALIZE

1  
2  
3 Study (NCT03188796) may also contribute to our understanding of the effect of high dose  
4 vitamin D3 on mortality.<sup>90</sup>  
5  
6

### 7 **Study limitations**

8  
9 We performed a full systematic review of the published evidence available, and simultaneous  
10 independent screening, data extraction and risk of bias assessments. However, our study is  
11 limited by the small amount of evidence available which was, moreover, at risk of bias. This  
12 limits the inferences that can be drawn. Seven eligible studies were excluded because they  
13 are not available as peer reviewed publications.<sup>62-68</sup> If published, these seven studies would  
14 be included. A final limitation is that the review was restricted to English language only.  
15 Therefore, articles published in other languages may have been excluded.  
16  
17  
18  
19

### 20 **Implications for practice**

21  
22 Our review does not provide evidence for or against additional or high dose vitamin D  
23 supplementation specifically in relation to COVID-19. Treatment as standard practice for  
24 people who are deficient is pre-existing practice. The European Food Safety Authority revised  
25 dietary reference values for vitamin D for the EU population in 2016.<sup>20</sup> They recommend that  
26 all population groups aged one year and more achieve an adequate intake of 15 µg/day with  
27 an assumed minimal sunshine exposure and considered there to be increase health risks at  
28 serum 25(OH)D concentrations below 50 nmol/L.<sup>91</sup> An Institute of Medicine review concluded  
29 that persons are at risk of vitamin D deficiency at serum 25(OH)D concentrations <30 nmol/L  
30 (<12 ng/mL) and 50 nmol/L is the serum 25(OH)D level that covers the needs of 97.5% of the  
31 US population. The current guidelines from PHE suggest that the entire UK population should  
32 take vitamin D supplements to prevent vitamin D deficiency in winter or with inadequate  
33 sunlight exposure to sun in summer.<sup>18</sup> This review does not give evidence to drive a change  
34 in this current advice. Treatment recommendations for patients should be updated following  
35 the publication of results from the ongoing randomised clinical trials.  
36  
37  
38  
39  
40  
41  
42

### 43 **Conclusion**

44  
45 This systematic review identified very limited evidence to enable us to assess an association  
46 between vitamin D supplementation or level with susceptibility to COVID-19 infection  
47 including clinical course, morbidity and mortality outcomes. Narrative synthesis of the four  
48 included studies found a retrospective cohort study in which univariable (but not  
49 multivariable) analysis showed that vitamin D protects against COVID-19; a cross-sectional  
50 study (107 participants) that suggested an inverse association between serum vitamin D and  
51 COVID-19; a case-control survey (n = 1486) that showed cases with confirmed/probable  
52 COVID-19 reported lower vitamin D supplementation and finally an ecological country level  
53 study that demonstrated a negative correlation between vitamin D and COVID-19 case  
54 numbers and mortality. All studies were at high or unclear risk of bias. The results provide  
55 very limited evidence of an association between vitamin D and COVID-19 infection. Both age  
56 and ethnicity were associated with vitamin D even after multivariable adjustment. Black and  
57  
58  
59  
60



1  
2  
3 South Asian people had a much higher risk of confirmed COVID-19 compared to white people.  
4 However, there was no interaction between the association of ethnicity and vitamin D  
5 deficiency with COVID-19. There were no papers reporting association of vitamin D with  
6 severity of symptoms or mortality due to COVID-19.  
7  
8  
9

### 10 **What is already known on this topic**

- 13 • Much speculation exists on the relationship between vitamin D and susceptibility to  
14 COVID-19 or disease/treatment outcomes but this has not been proven.
- 16 • Since low serum vitamin D predisposes to acute respiratory tract infections (RTI), and  
17 COVID-19 can manifest as an acute RTI, it is plausible that vitamin D supplementation  
18 could reduce the risk of contracting COVID-19 or reduce its severity. Such an intervention  
19 would be low cost and with few safety risks.
- 21 • A recent rapid review could not demonstrate any evidence of vitamin D deficiency  
22 predisposing to COVID-19 or of the successful use of vitamin D supplementation for  
23 preventing or treating COVID-19. However, this review was limited in its searches.  
24  
25  
26

### 27 **What this study adds**

- 30 • Four relevant studies were identified: a retrospective cohort study in which univariable  
31 (but not multivariable) analysis showed that vitamin D protects against COVID-19; a cross-  
32 sectional evaluation which suggested an inverse association between serum vitamin D  
33 and COVID-19, a survey where cases with confirmed/probable COVID-19 reported lower  
34 vitamin D supplementation, and an ecological study which demonstrated a negative  
35 correlation between vitamin D and COVID-19.
- 38 • Both age and ethnicity were associated with COVID-19 infection even after multivariable  
39 adjustment. Black and South Asian people had a much higher risk of confirmed COVID-19  
40 compared to white people. However, there was no interaction between ethnicity and  
41 vitamin D deficiency.
- 44 • Positive COVID-19 cases had lower serum vitamin D and reported lower vitamin D  
45 supplementation in comparison to negative cases.
- 48 • Due to limited evidence, we cannot conclude that vitamin D supplementation or level is  
49 associated with susceptibility to COVID-19, or its clinical course, morbidity or mortality.  
50 Meanwhile clinicians and policy makers should ensure that patients with vitamin D  
51 deficiency are appropriately treated, regardless of COVID-19 status, and follow pre-  
52 existing population level public health advice.  
53  
54  
55  
56  
57  
58  
59  
60

**Acknowledgements:**

We thank Mrs Kath Charters, Welsh Ambulance Services NHS Trust for comments on the study design and drafts of this manuscript and for valuable advice and helpful discussions.

**Contributorship statement:**

SK, AG and AC conceived the study. AG, AC, NMCC, SK, STP and OU designed the study. AG, AC, AM screened titles and abstracts for inclusion. AG, OO, AM, MZ, LAK, AC screened at full text and extracted and analysed data. OO, AM, MZ performed risk of bias assessments. AC, SK and NMCC assisted in the interpretation from a clinical perspective. STP, LAK, OU offered technical and methodological support. AG and OO wrote the first draft, all authors revised content. All authors approved the final manuscript. AG and AC are the guarantors. The corresponding author attests that all listed authors meet authorship criteria and that no others meeting the criteria have been omitted.

**Copyright/license for publication:**

The Corresponding Author has the right to grant on behalf of all authors and does grant on behalf of all authors, [a worldwide licence](#) to the Publishers and its licensees in perpetuity, in all forms, formats and media (whether known now or created in the future), to i) publish, reproduce, distribute, display and store the Contribution, ii) translate the Contribution into other languages, create adaptations, reprints, include within collections and create summaries, extracts and/or, abstracts of the Contribution, iii) create any other derivative work(s) based on the Contribution, iv) to exploit all subsidiary rights in the Contribution, v) the inclusion of electronic links from the Contribution to third party material where-ever it may be located; and, vi) licence any third party to do any or all of the above.

**Funding:**

Dr Amy Grove is supported by the National Institute for Health Research (NIHR) Advanced Fellowship Programme Reference (AF-300060). Dr Taylor-Phillips is supported by an NIHR Career Development Fellowship (CDF-2016-09-018). Prof Clarke and Dr Al-Khudairy are supported by the NIHR Applied Research Centre (ARC) West Midlands. All other authors, with the exception of Professor Uthman, Professor Kumar and Professor McCarthy, are supported by the NIHR, Evidence Synthesis Programme. The views expressed are those of the authors and not necessarily those of the NIHR or the Department of Health and Social Care.

**Competing interests:**

All authors have completed the ICMJE uniform disclosure form at [www.icmje.org/coi\\_disclosure.pdf](http://www.icmje.org/coi_disclosure.pdf) and declare: no support from any organisation for the submitted work; no competing interests with regards to the submitted work.

**Ethical statement:**

1  
2  
3 Not required  
4  
5

6 **Data sharing statement:**

7 The study protocol is available

8  
9 Systematic review protocol registration: CRD42020182876 available online via PROSPERO at  
10 [https://www.crd.york.ac.uk/prospero/display\\_record.php?ID=CRD42020182876](https://www.crd.york.ac.uk/prospero/display_record.php?ID=CRD42020182876). All  
11 included studies are publicly available. Additional data are available upon reasonable  
12 request by emailing the corresponding author.  
13  
14  
15  
16  
17  
18  
19  
20  
21  
22  
23  
24  
25  
26  
27  
28  
29  
30  
31  
32  
33  
34  
35  
36  
37  
38  
39  
40  
41  
42  
43  
44  
45  
46  
47  
48  
49  
50  
51  
52  
53  
54  
55  
56  
57  
58  
59  
60

For peer review only

## References

1. World Health Organization. Coronavirus disease (COVID-19) pandemic. 2020. <https://www.who.int/emergencies/diseases/novel-coronavirus-2019>
2. Gruber BM. Fenomen witaminy D [The phenomenon of vitamin D]. *Postepy Hig Med Dosw (Online)* 2015;69:127-39
3. Gruber-Bzura BM. Vitamin D and influenza: prevention or therapy? *Int J Mol Sci* 2018;19(8):2419. doi: 10.3390/ijms19082419
4. Holick MF. High prevalence of vitamin D inadequacy and implications for health. *Mayo Clin Proc* 2006;81(3):353-73. doi: 10.4065/81.3.353
5. Sigmundsdottir H, Pan J, Debes GF, et al. DCs metabolize sunlight-induced vitamin D3 to 'program' T cell attraction to the epidermal chemokine CCL27. *Nat Immunol* 2007;8(3):285-93. doi: 10.1038/ni1433
6. Kogawa M, Findlay DM, Anderson PH, et al. Osteoclastic metabolism of 25(OH)-vitamin D3: a potential mechanism for optimization of bone resorption. *Endocrinology* 2010;151(10):4613-25. doi: 10.1210/en.2010-0334
7. Jones G. Vitamin D safety: its mechanisms and application. *Standardy Medyczne, Pediatria* 2012;9:605-09
8. Kim D. The role of vitamin D in thyroid diseases. *Int J Mol Sci* 2017;18(9):1949. doi: 10.3390/ijms18091949
9. Beard JA, Bearden A, Striker R. Vitamin D and the anti-viral state. *J Clin Virol* 2011;50(3):194-200. doi: 10.1016/j.jcv.2010.12.006
10. Liu PT, Stenger S, Li H, et al. Toll-like receptor triggering of a vitamin D-mediated human antimicrobial response. *Science* 2006;311(5768):1770-3. doi: 10.1126/science.1123933
11. Adams JS, Ren S, Liu PT, et al. Vitamin D-directed rheostatic regulation of monocyte antibacterial responses. *J Immunol* 2009;182(7):4289-95. doi: 10.4049/jimmunol.0803736
12. Laaksi I. Vitamin D and respiratory infection in adults. *Proc Nutr Soc* 2012;71(1):90-7. doi: 10.1017/s0029665111003351
13. Sharifi A, Vahedi H, Nedjat S, Rafiei H, Hosseinzadeh-Attar MJ. Effect of single-dose injection of vitamin D on immune cytokines in ulcerative colitis patients: a randomized placebo-controlled trial. *APMIS* 2019;127(10):681-87. doi: 10.1111/apm.12982
14. Cantorna MT, Snyder L, Lin YD, Yang L. Vitamin D and 1,25(OH)<sub>2</sub>D regulation of T cells. *Nutrients* 2015;7(4):3011-21. doi: 10.3390/nu7043011
15. Jeffery LE, Burke F, Mura M, et al. 1,25-Dihydroxyvitamin D3 and IL-2 combine to inhibit T cell production of inflammatory cytokines and promote development of regulatory T cells expressing CTLA-4 and FoxP3. *J Immunol* 2009;183(9):5458-67. doi: 10.4049/jimmunol.0803217
16. Lei GS, Zhang C, Cheng BH, Lee CH. Mechanisms of action of vitamin D as supplemental therapy for pneumocystis pneumonia. *Antimicrob Agents Chemother* 2017;61(10):e01226-17. doi: 10.1128/aac.01226-17
17. Colunga Biancatelli RML, Berrill M, Marik PE. The antiviral properties of vitamin C. *Expert Rev Anti Infect Ther* 2020;18(2):99-101. doi: 10.1080/14787210.2020.1706483

18. Scientific Advisory Committee on Nutrition. SACN vitamin D and health report. 21 July 2016. <https://www.gov.uk/government/publications/sacn-vitamin-d-and-health-report>
19. National Institutes of Health, Office of Dietary Supplements. Vitamin D: fact sheet for health professionals. 24 March 2020. <https://ods.od.nih.gov/factsheets/VitaminD-HealthProfessional/#h2>
20. EFSA Panel on Dietetic Products, Nutrition and Allergies. Dietary reference values for vitamin D. *EFSA Journal* 2016;14(10):e04547. doi: 10.2903/j.efsa.2016.4547
21. Cao Z, Wu Y, Faucon E, Sabatier JM. SARS-CoV-2 & Covid-19: key-roles of the 'renin-angiotensin' system / vitamin D impacting drug and vaccine developments. *Infect Disord Drug Targets* 2020;20(1). doi: 10.2174/1871526520999200505174704
22. Jakovac H. COVID-19 and vitamin D: is there a link and an opportunity for intervention? *Am J Physiol Endocrinol Metab* 2020;318(5):E589. doi: 10.1152/ajpendo.00138.2020
23. Mitchell F. Vitamin-D and COVID-19: do deficient risk a poorer outcome? *Lancet Diabetes Endocrinol* 2020;8(7):570. doi: 10.1016/S2213-8587(20)30183-2
24. Silberstein M. Vitamin D: a simpler alternative to tocilizumab for trial in COVID-19? *Med Hypotheses* 2020;140:109767. doi: 10.1016/j.mehy.2020.109767
25. Calder PC, Carr AC, Gombart AF, Eggersdorfer M. Optimal nutritional status for a well-functioning immune system is an important factor to protect against viral infections. *Nutrients* 2020;12(4):1181. doi: <https://dx.doi.org/10.3390/nu12041181>
26. Tian Y, Rong L. Letter: Covid-19, and vitamin D. Authors' reply. *Aliment Pharmacol Ther* 2020;51(10):995-96. doi: 10.1111/apt.15764
27. Busby M. UK public health bodies reviewing vitamin D's effects on coronavirus. The Guardian; 17 June 2020. <https://www.theguardian.com/world/2020/jun/17/uk-ministers-order-urgent-vitamin-d-coronavirus-review>
28. Coronavirus: Should I start taking vitamin D? BBC News; 18 June 2020. <https://www.bbc.co.uk/news/health-52371688>
29. Torjesen I. Covid-19: Public health agencies review whether vitamin D supplements could reduce risk. *BMJ* 2020;369:m2475. doi: 10.1136/bmj.m2475
30. Grant WB, Lahore H, McDonnell SL, et al. Evidence that vitamin D supplementation could reduce risk of influenza and COVID-19 infections and deaths. *Nutrients* 2020;12(4):988. doi: 10.3390/nu12040988
31. Parker J, Hashmi O, Dutton D, et al. Levels of vitamin D and cardiometabolic disorders: systematic review and meta-analysis. *Maturitas* 2010;65(3):225-36. doi: 10.1016/j.maturitas.2009.12.013
32. Cannell JJ, Vieth R, Umhau JC, et al. Epidemic influenza and vitamin D. *Epidemiol Infect* 2006;134(6):1129-40. doi: 10.1017/s0950268806007175
33. Jolliffe DA, Griffiths CJ, Martineau AR. Vitamin D in the prevention of acute respiratory infection: systematic review of clinical studies. *J Steroid Biochem Mol Biol* 2013;136:321-9. doi: 10.1016/j.jsbmb.2012.11.017
34. Nnoaham KE, Clarke A. Low serum vitamin D levels and tuberculosis: a systematic review and meta-analysis. *Int J Epidemiol* 2008;37(1):113-19. doi: 10.1093/ije/dym247
35. Martineau AR, Jolliffe DA, Hooper RL, et al. Vitamin D supplementation to prevent acute respiratory tract infections: systematic review and meta-analysis of individual participant data. *BMJ* 2017;356:i6583. doi: 10.1136/bmj.i6583

- 1  
2  
3 36. National Institute for Health and Care Excellence. COVID-19 rapid evidence summary:  
4 vitamin D for COVID-19. 29 June 2020.  
5 <https://www.nice.org.uk/advice/es28/chapter/Key-messages>  
6
- 7 37. Royal Society. Vitamin D and covid-19. 18 June 2020. [https://royalsociety.org/-](https://royalsociety.org/-/media/policy/projects/set-c/set-c-vitamin-d-and-covid-19.pdf)  
8 [/media/policy/projects/set-c/set-c-vitamin-d-and-covid-19.pdf](https://royalsociety.org/-/media/policy/projects/set-c/set-c-vitamin-d-and-covid-19.pdf)  
9
- 10 38. Lee J, van Hecke O, Roberts N, on behalf of the Oxford COVID-19 Evidence Service Team.  
11 Vitamin D: a rapid review of the evidence for treatment or prevention in COVID-19.  
12 Centre for Evidence-Based Medicine, University of Oxford; 1 May 2020.  
13 [https://www.cebm.net/covid-19/vitamin-d-a-rapid-review-of-the-evidence-for-](https://www.cebm.net/covid-19/vitamin-d-a-rapid-review-of-the-evidence-for-treatment-or-prevention-in-covid-19/)  
14 [treatment-or-prevention-in-covid-19/](https://www.cebm.net/covid-19/vitamin-d-a-rapid-review-of-the-evidence-for-treatment-or-prevention-in-covid-19/)  
15
- 16 39. NHS. Check if you or your child has coronavirus symptoms. 2020.  
17 <https://www.nhs.uk/conditions/coronavirus-covid-19/symptoms/#symptoms>  
18
- 19 40. Argenziano MG, Bruce SL, Slater CL, et al. Characterization and clinical course of 1000  
20 patients with coronavirus disease 2019 in New York: retrospective case series. *BMJ*  
21 2020;369:m1996. doi: 10.1136/bmj.m1996  
22
- 23 41. Matthay MA, Aldrich JM, Gotts JE. Treatment for severe acute respiratory distress  
24 syndrome from COVID-19. *Lancet Respir Med* 2020;8(5):433-34. doi: 10.1016/s2213-  
25 2600(20)30127-2  
26
- 27 42. Moher D, Liberati A, Tetzlaff J, Altman DG. Preferred reporting items for systematic  
28 reviews and meta-analyses: the PRISMA statement. *BMJ* 2009;339:b2535. doi:  
29 10.1136/bmj.b2535  
30
- 31 43. World Health Organization. Global research on coronavirus disease (COVID-19) [online  
32 database]. 2020. [https://www.who.int/emergencies/diseases/novel-coronavirus-](https://www.who.int/emergencies/diseases/novel-coronavirus-2019/global-research-on-novel-coronavirus-2019-ncov)  
33 [2019/global-research-on-novel-coronavirus-2019-ncov](https://www.who.int/emergencies/diseases/novel-coronavirus-2019/global-research-on-novel-coronavirus-2019-ncov)  
34
- 35 44. Oxford COVID-19 Evidence Service. Centre for Evidence-Based Medicine, University of  
36 Oxford; 2020. <https://www.cebm.net/oxford-covid-19-evidence-service/>  
37
- 38 45. Counotte M, Imeri H, Ipekci M, Low N. Living evidence on COVID-19 [online database].  
39 University of Bern Institute of Social and Preventive Medicine; 2020.  
40 <https://zika.ispm.unibe.ch/assets/data/pub/ncov/>  
41
- 42 46. Carter SJ, Baranuskas MN, Fly AD. Considerations for obesity, vitamin D, and physical  
43 activity amidst the COVID-19 pandemic. *Obesity (Silver Spring)* 2020;28:1176-77. doi:  
44 10.1002/oby.22838  
45
- 46 47. Molloy EJ, Murphy N. Vitamin D, covid-19 and children. *Ir Med J* 2020;113(4):64  
47
- 48 48. McCartney DM, Byrne DG. Optimisation of vitamin D status for enhanced immuno-  
49 protection against covid-19. *Ir Med J* 2020;113(4):P58  
50
- 51 49. Adams KK, Baker WL, Sobieraj DM. Myth busters: dietary supplements and COVID-19.  
52 *Ann Pharmacother* 2020;54(8):820-26. doi: 10.1177/1060028020928052  
53
- 54 50. de Lucena TMC, da Silva Santos AF, de Lima BR, de Albuquerque Borborema ME, de  
55 Azevedo Silva J. Mechanism of inflammatory response in associated comorbidities in  
56 COVID-19. *Diabetes Metab Syndr* 2020;14(4):597-600. doi:  
57 10.1016/j.dsx.2020.05.025  
58
- 59 51. Ghasemian R, Shamshirian A, Heydari K, et al. The role of vitamin D in the age of COVID-  
60 19: a systematic review and meta-analysis along with an ecological approach.  
*medRxiv* 2020. doi: 10.1101/2020.06.05.20123554
- 52 52. Hribar CA, Cobbold PH, Church FC. Potential role of vitamin D in the elderly to resist  
53 COVID-19 and to slow progression of Parkinson's disease. *Brain Sci* 2020;10(5):284.  
54 doi: 10.3390/brainsci10050284



- 1
- 2
- 3
- 4 53. Laird E, Rhodes J, Kenny RA. Vitamin D and inflammation: potential implications for
- 5 severity of Covid-19. *Ir Med J* 2020;113(5):P81
- 6 54. McKenna MJ, Flynn MAT. Covid-19, cocooning and vitamin D intake requirements. *Ir*
- 7 *Med J* 2020;113(5):P79
- 8 55. Ribeiro H, Santana KVS, Oliver SL, et al. Does vitamin D play a role in the management of
- 9 Covid-19 in Brazil? *Rev Saude Publica* 2020;54:53
- 10 56. Speeckaert MM, Delanghe JR. Association between low vitamin D and COVID-19: don't
- 11 forget the vitamin D binding protein. *Aging Clin Exp Res* 2020. doi: 10.1007/s40520-
- 12 020-01607-y
- 13 57. Suresh PS. Hypovitaminosis D and COVID-19: matter of concern in India? *Indian J Clin*
- 14 *Biochem* 2020. doi: 10.1007/s12291-020-00894-6
- 15 58. Tan SHS, Hong CC, Saha S, Murphy D, Hui JH. Medications in COVID-19 patients:
- 16 summarizing the current literature from an orthopaedic perspective. *Int Orthop*
- 17 2020. doi: 10.1007/s00264-020-04643-5
- 18 59. Zabetakis I, Lordan R, Norton C, Tsoupras A. COVID-19: the inflammation link and the
- 19 role of nutrition in potential mitigation. *Nutrients* 2020;12(5):1466. doi:
- 20 10.3390/nu12051466
- 21 60. Centers for Disease Control and Prevention. CDC SARS response timeline. 2013.
- 22 <https://www.cdc.gov/about/history/sars/timeline.htm>
- 23 61. Downs SH, Black N. The feasibility of creating a checklist for the assessment of the
- 24 methodological quality both of randomised and non-randomised studies of health
- 25 care interventions. *J Epidemiol Community Health* 1998;52(6):377-84. doi:
- 26 10.1136/jech.52.6.377
- 27 62. Lau FH, Majumder R, Torabi R, et al. Vitamin D insufficiency is prevalent in severe
- 28 COVID-19. *medRxiv* 2020. doi: 10.1101/2020.04.24.20075838
- 29 63. Darling AL, Ahmadi KR, Ward KA, et al. Vitamin D status, body mass index, ethnicity and
- 30 COVID-19: initial analysis of the first-reported UK Biobank COVID-19 positive cases (n
- 31 580) compared with negative controls (n 723). *medRxiv* 2020. doi:
- 32 10.1101/2020.04.29.20084277
- 33 64. De Smet D, De Smet K, Herroelen P, Gryspeerdt S, Martens GA. Vitamin D deficiency as
- 34 risk factor for severe COVID-19: a convergence of two pandemics. *medRxiv* 2020.
- 35 doi: 10.1101/2020.05.01.20079376
- 36 65. Meltzer DO, Best TJ, Zhang H, Vokes T, Arora V, Solway J. Association of vitamin D
- 37 deficiency and treatment with COVID-19 incidence. *medRxiv* 2020. doi:
- 38 10.1101/2020.05.08.20095893
- 39 66. Notari A, Torrieri G. COVID-19 transmission risk factors. *medRxiv* 2020. doi:
- 40 10.1101/2020.05.08.20095083
- 41 67. Raisi-Estabragh Z, McCracken C, Bethell MS, et al. Greater risk of severe COVID-19 in
- 42 non-White ethnicities is not explained by cardiometabolic, socioeconomic, or
- 43 behavioural factors, or by 25(OH)-vitamin D status: study of 1,326 cases from the UK
- 44 Biobank. *medRxiv* 2020. doi: 10.1101/2020.06.01.20118943
- 45 68. Tan CW, Ho LP, Kalimuddin S, et al. A cohort study to evaluate the effect of combination
- 46 vitamin D, magnesium and vitamin B12 (DMB) on progression to severe outcome in
- 47 older COVID-19 patients. *medRxiv* 2020. doi: 10.1101/2020.06.01.20112334
- 48 69. Hastie CE, Mackay DF, Ho F, et al. Vitamin D concentrations and COVID-19 infection in
- 49 UK Biobank. *Diabetes Metab Syndr* 2020;14(4):561-65. doi:
- 50 10.1016/j.dsx.2020.04.050
- 51
- 52
- 53
- 54
- 55
- 56
- 57
- 58
- 59
- 60

- 1  
2  
3  
4  
5  
6  
7  
8  
9  
10  
11  
12  
13  
14  
15  
16  
17  
18  
19  
20  
21  
22  
23  
24  
25  
26  
27  
28  
29  
30  
31  
32  
33  
34  
35  
36  
37  
38  
39  
40  
41  
42  
43  
44  
45  
46  
47  
48  
49  
50  
51  
52  
53  
54  
55  
56  
57  
58  
59  
60
70. Ilie PC, Stefanescu S, Smith L. The role of vitamin D in the prevention of coronavirus disease 2019 infection and mortality. *Aging Clin Exp Res* 2020. doi: 10.1007/s40520-020-01570-8
  71. UK Biobank. About UK Biobank. 17 June 2020. <https://www.ukbiobank.ac.uk/about-biobank-uk/>
  72. D'Avolio A, Avataneo V, Manca A, et al. 25-hydroxyvitamin D concentrations are lower in patients with positive PCR for SARS-CoV-2. *Nutrients* 2020;12(5):1359. doi: 10.3390/nu12051359
  73. Fasano A, Cereda E, Barichella M, et al. COVID-19 in Parkinson's Disease Patients Living in Lombardy, Italy. *Mov Disord* 2020. doi: 10.1002/mds.28176
  74. Liu Y, Mao B, Liang S, et al. Association between age and clinical characteristics and outcomes of COVID-19. *Eur Respir J* 2020;55(5):2001112. doi: 10.1183/13993003.01112-2020
  75. Verity R, Okell LC, Dorigatti I, et al. Estimates of the severity of coronavirus disease 2019: a model-based analysis. *Lancet Infect Dis* 2020;20(6):669-77. doi: 10.1016/s1473-3099(20)30243-7
  76. Mahase E. Covid-19: death rate is 0.66% and increases with age, study estimates. *BMJ* 2020;369:m1327. doi: 10.1136/bmj.m1327
  77. Fulzele S, Sahay B, Yusufu I, et al. COVID-19 virulence in aged patients might be impacted by the host cellular microRNAs abundance/profile. *Aging Dis* 2020;11(3):509-22. doi: 10.14336/ad.2020.0428
  78. Koff WC, Williams MA. Covid-19 and immunity in aging populations: a new research agenda. *N Engl J Med* 2020. doi: 10.1056/NEJMp2006761
  79. Watkins J. Preventing a covid-19 pandemic. *BMJ* 2020;368:m810. doi: 10.1136/bmj.m810
  80. Pan D, Sze S, Minhas JS, et al. The impact of ethnicity on clinical outcomes in COVID-19: a systematic review. *EClinicalMedicine*. doi: 10.1016/j.eclinm.2020.100404
  81. Lee C. "Race" and "ethnicity" in biomedical research: how do scientists construct and explain differences in health? *Soc Sci Med* 2009;68(6):1183-90. doi: 10.1016/j.socscimed.2008.12.036
  82. Stead WW, Senner JW, Reddick WT, Lofgren JP. Racial differences in susceptibility to infection by Mycobacterium tuberculosis. *N Engl J Med* 1990;322(7):422-7. doi: 10.1056/nejm199002153220702
  83. Nahid P, Horne DJ, Jarlsberg LG, et al. Racial differences in tuberculosis infection in United States communities: the coronary artery risk development in young adults study. *Clin Infect Dis* 2011;53(3):291-4. doi: 10.1093/cid/cir378
  84. Bime C, Poongkunran C, Borgstrom M, et al. Racial differences in mortality from severe acute respiratory failure in the United States, 2008-2012. *Ann Am Thorac Soc* 2016;13(12):2184-89. doi: 10.1513/AnnalsATS.201605-359OC
  85. Lanham-New SA, Webb AR, Cashman KD, et al. Vitamin D and SARS-CoV-2 virus/COVID-19 disease. *BMJ Nutrition, Prevention & Health* 2020:bmjnph-2020-000089. doi: 10.1136/bmjnph-2020-000089
  86. Huang F, Zhang C, Liu Q, et al. Identification of amitriptyline HCl, flavin adenine dinucleotide, azacitidine and calcitriol as repurposing drugs for influenza A H5N1 virus-induced lung injury. *PLoS Pathog* 2020;16(3):e1008341. doi: 10.1371/journal.ppat.1008341



- 1  
2  
3 87. Lee C. Controversial effects of vitamin D and related genes on viral infections,  
4 pathogenesis, and treatment outcomes. *Nutrients* 2020;12(4):962. doi:  
5 10.3390/nu12040962  
6  
7 88. Impact of zinc and vitamin D3 supplementation on the survival of aged patients infected  
8 with COVID-19. NCT04351490. ClinicalTrials.gov, U.S. National Library of Medicine;  
9 2020. <https://ClinicalTrials.gov/show/NCT04351490>  
10  
11 89. COvid-19 and Vitamin D supplementation: a multicenter randomized controlled trial of  
12 high dose versus standard dose vitamin D3 in high-risk COVID-19 Patients  
13 (CoVitTrial). NCT04344041. ClinicalTrials.gov, U.S. National Library of Medicine;  
14 2020. <https://clinicaltrials.gov/show/NCT04344041>  
15  
16 90. The VITDALIZE Study: effect of high-dose vitamin D3 on 28-day mortality in adult  
17 critically ill patients. NCT03188796. ClinicalTrials.gov, U.S. National Library of  
18 Medicine; 2017. <https://ClinicalTrials.gov/show/NCT03188796>  
19  
20 91. Scientific Advisory Committee on Nutrition, European Food Safety Authority. Joint  
21 explanatory note by the European Food Safety Authority and the UK Scientific  
22 Advisory Committee on Nutrition regarding dietary reference values for vitamin D.  
23 2016.  
24 [https://www.efsa.europa.eu/sites/default/files/documents/news/explanatory\\_note](https://www.efsa.europa.eu/sites/default/files/documents/news/explanatory_note_EFSA_SACN_vitaminD.pdf)  
25 [\\_EFSA\\_SACN\\_vitaminD.pdf](https://www.efsa.europa.eu/sites/default/files/documents/news/explanatory_note_EFSA_SACN_vitaminD.pdf)  
26  
27  
28  
29  
30  
31  
32  
33  
34  
35  
36  
37  
38  
39  
40  
41  
42  
43  
44  
45  
46  
47  
48  
49  
50  
51  
52  
53  
54  
55  
56  
57  
58  
59  
60

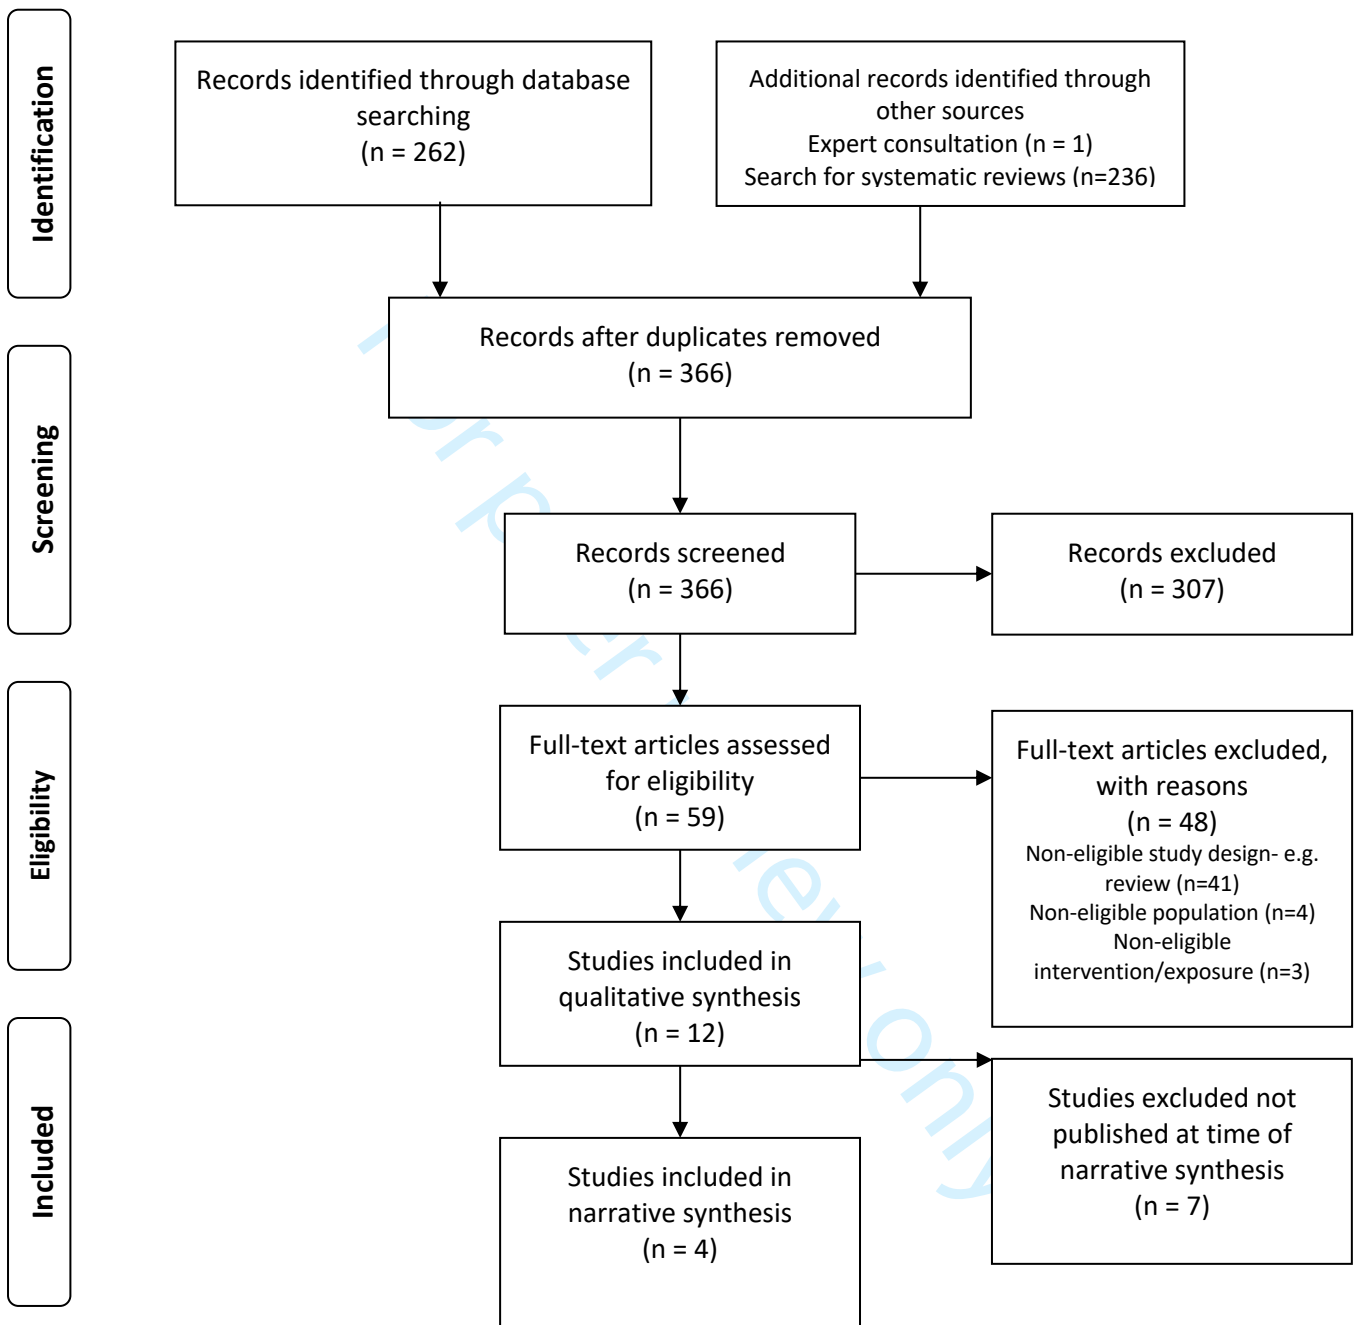

## Supplemental file

### Contents

1. Full record of search
2. Full details of the study eligibility criteria
3. List of studies excluded at full text review
4. Quality assessment of included studies

#### 1. Full record of search

##### Medline (Ovid)

Search date: 06/05/2020

Database: Ovid MEDLINE(R) ALL <1946 to May 05, 2020>

Search Strategy:

- 
- 1 exp Vitamin D/ (58492)
  - 2 Vitamin D Deficiency/ (15552)
  - 3 (vitamin D? or vit D? or D vitamin? or ergocalciferol or cholecalciferol or coledalciferol or calciferol or dihydroergocalciferol or sitocalciferol or dihydrotachysterol or dihydroxycholecalciferol? or hydroxycholecalciferol? or "25(OH)D?" or 25OHD? or calcidiol or hydroxyergocalciferol or alfacalcidol or alphacalcidol or "1,25(OH)2D" or hydroxyvitamin D? or dihydroxyvitamin D?).ab,kf,ti. (78232)
  - 4 (paricalcitol or doxercalciferol or doxerocalciferol or calcifediol or calcitriol).ab,kf,ti. (5577)
  - 5 hypovitaminosis D?.ab,kf,ti. (1775)
  - 6 ((D or D2 or D3) adj3 supplement\*).ab,kf,ti. (12158)
  - 7 1 or 2 or 3 or 4 or 5 or 6 (92560)
  - 8 coronavirus/ or betacoronavirus/ or betacoronavirus 1/ or coronavirus oc43, human/ or middle east respiratory syndrome coronavirus/ or sars virus/ (7431)
  - 9 coronavirus infections/ or severe acute respiratory syndrome/ (10675)
  - 10 (((corona\* or corono\*) adj1 (virus\* or viral\* or virinae\*)) or coronavirus\* or coronavirus\* or coronavirinae\* or Coronavirus\* or Coronovirus\* or Wuhan\* or Hubei\* or Huanan or "2019-nCoV" or 2019nCoV or nCoV2019 or "nCoV-2019" or "COVID-19" or COVID19 or "CORVID-19" or CORVID19 or "WN-CoV" or WNCov or "HCoV-19" or HCoV19 or CoV or "2019 novel\*" or Ncov or "n-cov" or "SARS-CoV-2" or "SARSCoV-2" or "SARSCoV2" or "SARS-CoV2" or SARSCov19 or "SARS-Cov19" or "SARSCov-19" or "SARS-Cov-19" or Ncovor or Ncorona\* or Ncorono\* or NcovWuhan\* or NcovHubei\* or NcovChina\* or NcovChinese\*).ab,kf,ti. (26891)
  - 11 (severe acute respiratory syndrome or SARS or Middle East respiratory syndrome or MERS).ab,kf,ti. (16560)
  - 12 (betacoronavirus\* or betacoronavirinae\*).ab,kf,ti. (280)
  - 13 8 or 9 or 10 or 11 or 12 (37180)
  - 14 7 and 13 (32)
  - 15 exp Animals/ (23144176)
  - 16 exp Humans/ (18448248)
  - 17 15 not 16 (4695928)

- 1  
2  
3 18 14 not 17 (30)  
4 19 limit 18 to yr="2002 -Current" (30)  
5

6  
7 Update

8 Search date: 10/6/2020

9 Actual databases searched: Ovid MEDLINE All <1946 to June 09, 2020>

10 Search strategy:

11 Re-ran search above plus...

- 12 20 limit 19 to ed=20200506-20200610 (8)  
13 21 limit 19 to ep=20200506-20200610 (39)  
14 22 limit 19 to dt=20200506-20200610 (43)  
15 23 limit 19 to ez=20200506-20200610 (27)  
16 24 20 or 21 or 22 or 23 (46)  
17  
18

19  
20 **Embase (Ovid)**

21  
22 Search date: 06/05/2020

23 Database: Embase <1974 to 2020 May 05>

24 Search Strategy:

- 25 -----  
26  
27 1 exp vitamin D/ (139781)  
28 2 vitamin D deficiency/ (29333)  
29 3 (vitamin D? or vit D? or D vitamin? or ergocalciferol or cholecalciferol or colecalciferol or  
30 calciferol or dihydroergocalciferol or sitocalciferol or dihydrotachysterol or dihydroxycholecalciferol?  
31 or hydroxycholecalciferol? or "25(OH)D?" or 25OHD? or calcidiol or hydroxyergocalciferol or  
32 alfacalcidol or alphacalcidol or "1,25(OH)2D" or hydroxyvitamin D? or dihydroxyvitamin D?).ab,kw,ti.  
33 (112459)  
34 4 (paricalcitol or doxercalciferol or doxerocalciferol or calcifediol or calcitriol).ab,kw,ti. (8478)  
35 5 hypovitaminosis D?.ab,kw,ti. (3012)  
36 6 ((D or D2 or D3) adj3 supplement\*).ab,kw,ti. (19177)  
37 7 1 or 2 or 3 or 4 or 5 or 6 (163395)  
38 8 betacoronavirus 1/ or betacoronavirus/ or human coronavirus oc43/ (696)  
39 9 Middle East respiratory syndrome coronavirus/ (2028)  
40 10 sars-related coronavirus/ or sars coronavirus/ (6354)  
41 11 Coronavirinae/ (2231)  
42 12 coronavirus infection/ or middle east respiratory syndrome/ or severe acute respiratory  
43 syndrome/ (11950)  
44 13 (((corona\* or corono\*) adj1 (virus\* or viral\* or virinae\*)) or coronavirus\* or coronovirus\* or  
45 coronavirinae\* or Coronavirus\* or Coronovirus\* or Wuhan\* or Hubei\* or Huanan or "2019-nCoV" or  
46 2019nCoV or nCoV2019 or "nCoV-2019" or "COVID-19" or COVID19 or "CORVID-19" or CORVID19 or  
47 "WN-CoV" or WNCov or "HCoV-19" or HCoV19 or CoV or "2019 novel\*" or Ncov or "n-cov" or "SARS-  
48 CoV-2" or "SARSCoV-2" or "SARSCoV2" or "SARS-CoV2" or SARSCov19 or "SARS-Cov19" or "SARSCov-  
49 19" or "SARS-Cov-19" or Ncovor or Ncorona\* or Ncorono\* or NcovWuhan\* or NcovHubei\* or  
50 NcovChina\* or NcovChinese\*).ab,kw,ti. (27686)  
51 14 (severe acute respiratory syndrome or SARS or Middle East respiratory syndrome or  
52 MERS).ab,kw,ti. (17146)  
53 15 (betacoronavirus\* or betacoronavirinae\*).ab,kw,ti. (275)  
54 16 8 or 9 or 10 or 11 or 12 or 13 or 14 or 15 (40716)  
55 17 7 and 16 (61)  
56 18 exp animal/ (25459151)  
57  
58  
59  
60

1  
2  
3 19 exp human/ (20834835)  
4 20 18 not 19 (4624316)  
5 21 17 not 20 (58)  
6 22 limit 21 to yr="2002 -Current" (58)  
7

8  
9 Update

10 Search date: 10/6/2020  
11 Actual databases searched: Ovid Embase <1974 to 2020 June 09>  
12 Search strategy:  
13 Re-ran search above plus...  
14 22 limit 21 to yr="2002 -Current" (123)  
15 23 limit 22 to dd=20200506-20200610 (39)  
16 24 limit 22 to em=202005-202006 (0)  
17 25 limit 22 to dc=20200506-20200610 (62)  
18 26 23 or 24 or 25 (62)  
19  
20  
21

22 **Medrxiv** (searched via Medrxivr <https://mcguinlu.shinyapps.io/medrxivr/>)  
23

24 Search date: 07/05/2020  
25 Search Strategy:

26  
27  
28 Topic 1:

29  
30 [Vv]itamin D  
31 [Vv]itamin D2  
32 [Vv]itamin D3  
33 calciferol  
34 25OHD  
35 25OHD3  
36 [Hh]ypovitaminosis D  
37  
38  
39

40 Topic 2:

41  
42 [Cc]oronavirus  
43 [Cc]orona(\s)([:graph:]+\s){0,1}virus  
44 [Cc]oronavirinae  
45 [Cc]ovid  
46 COVID  
47 nCoV  
48 NCOV  
49 Ncov  
50 [Nn]-cov  
51 N-COV  
52 2019ncov  
53 2019-ncov  
54 ncov2019  
55 ncov-2019  
56 SARS  
57 [Ss]evere [Aa]cute [Rr]espiratory [Ss]yndrome  
58  
59  
60

1  
2  
3 [Mm]iddle [Ee]ast [Rr]espiratory [Ss]yndrome  
4 MERS  
5

6 Earliest record date  
7 20190101  
8 Latest record date  
9 20200507  
10 Remove older versions of the same record  
11  
12

13 6 results  
14

15 Update

16 Search date: 10/6/2020  
17 Re-ran search above changing record dates as follows:  
18 Earliest record date  
19 20200507  
20 Latest record date  
21 20200610  
22 Remove older versions of the same record  
23  
24

25 11 results  
26  
27  
28

29 **BioRxiv**

30 <https://www.biorxiv.org/>  
31

32 Search date: 07/05/2020  
33

34 65 Results  
35 for abstract or title "vitamin D" (match phrase words)  
36  
37

38 22 Results  
39 for full text or abstract or title "ergocalciferol cholecalciferol colecalciferol" (match whole any)  
40

41 41 Results  
42 for full text or abstract or title "25OHD 25OHD3" (match whole any)  
43  
44

45 Imported into EndNote and de-duplicated  
46 92 results after deduplication  
47

48 Searched in Endnote using the following search strategy:  
49 coronavirus or corona or covid or SARS or MERS or betacoronavirus or ncov  
50 *Any Field*  
51

52 5 results  
53  
54

55 Update

56 Search date: 10/6/2020  
57

58 1 Results  
59  
60

for abstract or title "vitamin D" (match phrase words) and posted between "07 May, 2020 and 10 Jun, 2020" – *animal study (also in both results sets below) so not exported to EndNote*

### 3 Results

for full text or abstract or title "ergocalciferol cholecalciferol colecalciferol" (match whole any) and posted between "07 May, 2020 and 10 Jun, 2020" - *2 animal studies and 1 on sertraline in TB*

### 2 Results

for full text or abstract or title "25OHD 25OHD3" (match whole any) and posted between "07 May, 2020 and 10 Jun, 2020" - *1 animal study, 1 non-clinical / non-coronavirus*

0 results relevant to coronaviruses

## Cochrane Library

Search date: 08/05/2020

| ID  | Search Hits                                                                                                                                                                                                                                                                                                                                                                                                                                                                                                                                                                                                       |
|-----|-------------------------------------------------------------------------------------------------------------------------------------------------------------------------------------------------------------------------------------------------------------------------------------------------------------------------------------------------------------------------------------------------------------------------------------------------------------------------------------------------------------------------------------------------------------------------------------------------------------------|
| #1  | MeSH descriptor: [Vitamin D] explode all trees 5224                                                                                                                                                                                                                                                                                                                                                                                                                                                                                                                                                               |
| #2  | MeSH descriptor: [Vitamin D Deficiency] this term only 1226                                                                                                                                                                                                                                                                                                                                                                                                                                                                                                                                                       |
| #3  | ((vitamin NEXT D?) or (vit NEXT D?) or (D NEXT vitamin?) or ergocalciferol or cholecalciferol or colecalciferol or calciferol or dihydroergocalciferol or sitocalciferol or dihydrotachysterol or dihydroxycholecalciferol? or hydroxycholecalciferol? or "25(OH)D" or "25(OH)D3" or 25OHD? or calcidiol or hydroxyergocalciferol or alfacalcidol or alphacalcidol or "1,25(OH)2D" or (hydroxyvitamin NEXT D?) or (dihydroxyvitamin NEXT D?):ti,ab,kw 12959                                                                                                                                                       |
| #4  | (paricalcitol or doxercalciferol or doxerocalciferol or calcifediol or calcitriol):ti,ab,kw 2417                                                                                                                                                                                                                                                                                                                                                                                                                                                                                                                  |
| #5  | hypovitaminosis NEXT D? 303                                                                                                                                                                                                                                                                                                                                                                                                                                                                                                                                                                                       |
| #6  | ((D OR D2 OR D3) NEAR/3 supplement*):ti,ab,kw 5633                                                                                                                                                                                                                                                                                                                                                                                                                                                                                                                                                                |
| #7  | #1 or #2 or #3 or #4 or #5 or #6 14461                                                                                                                                                                                                                                                                                                                                                                                                                                                                                                                                                                            |
| #8  | MeSH descriptor: [Coronavirus] this term only 2                                                                                                                                                                                                                                                                                                                                                                                                                                                                                                                                                                   |
| #9  | MeSH descriptor: [Betacoronavirus] this term only 2                                                                                                                                                                                                                                                                                                                                                                                                                                                                                                                                                               |
| #10 | MeSH descriptor: [Betacoronavirus 1] this term only 0                                                                                                                                                                                                                                                                                                                                                                                                                                                                                                                                                             |
| #11 | MeSH descriptor: [Coronavirus OC43, Human] this term only 0                                                                                                                                                                                                                                                                                                                                                                                                                                                                                                                                                       |
| #12 | MeSH descriptor: [Middle East Respiratory Syndrome Coronavirus] explode all trees 1                                                                                                                                                                                                                                                                                                                                                                                                                                                                                                                               |
| #13 | MeSH descriptor: [SARS Virus] this term only 9                                                                                                                                                                                                                                                                                                                                                                                                                                                                                                                                                                    |
| #14 | MeSH descriptor: [Coronavirus Infections] this term only 137                                                                                                                                                                                                                                                                                                                                                                                                                                                                                                                                                      |
| #15 | MeSH descriptor: [Severe Acute Respiratory Syndrome] this term only 107                                                                                                                                                                                                                                                                                                                                                                                                                                                                                                                                           |
| #16 | ((corona* or corono*) near/1 (virus* or viral* or virinae*)) or coronavirus* or coronavirus* or coronavirinae* or Coronavirus* or Coronavirus* or Wuhan* or Hubei* or Huanan or "2019-nCoV" or 2019nCoV or nCoV2019 or "nCoV-2019" or "COVID-19" or COVID19 or "CORVID-19" or CORVID19 or "WN-CoV" or WNCov or "HCoV-19" or HCoV19 or CoV or "2019 novel*" or Ncov or "n-cov" or "SARS-CoV-2" or "SARSCoV-2" or "SARSCoV2" or "SARS-CoV2" or SARSCov19 or "SARS-Cov19" or "SARSCov-19" or "SARS-Cov-19" or Ncovor or Ncorona* or Ncorono* or NcovWuhan* or NcovHubei* or NcovChina* or NcovChinese*):ti,ab,kw 614 |
| #17 | ("severe acute respiratory syndrome" or SARS or "Middle East respiratory syndrome" or MERS):ti,ab,kw 350                                                                                                                                                                                                                                                                                                                                                                                                                                                                                                          |
| #18 | (betacoronavirus* or betacoronavirinae*):ti,ab,kw 4                                                                                                                                                                                                                                                                                                                                                                                                                                                                                                                                                               |
| #19 | #8 or #9 or #10 or #11 or #12 or #13 or #14 or #15 or #16 or #17 or #18 798                                                                                                                                                                                                                                                                                                                                                                                                                                                                                                                                       |
| #20 | #7 and #19 3                                                                                                                                                                                                                                                                                                                                                                                                                                                                                                                                                                                                      |

[all 3 results were from CENTRAL]

Update

Search date: 10/06/2020

Re-ran search exactly as above and retrieved 5 results, all from CENTRAL. All 5 results exported to EndNote for deduplication.

**Database of publications (living map of evidence) on coronavirus disease (COVID-19) developed by the University of Bern**

Living Evidence on COVID-19

Contributors: Michel Counotte, Hira Imeri, Mert Ipekci, Nicola Low

<https://zika.ispm.unibe.ch/assets/data/pub/ncov/>

Search date: 10/05/2020 (14,988 entries)

Search: Title, Abstract

Search:

vitamin D 13  
vitamin D2 0  
vitamin D3 0  
ergocalciferol 0  
cholecalciferol 0  
coleciferol 0  
25(OH)D 0  
25OHD 0  
25(OH)D3 0  
25OHD3 0  
hypovitaminosis D 1  
Vitamin D Deficiency 1

**Oxford COVID-19 Evidence Service**

<https://www.cebm.net/oxford-covid-19-evidence-service/>

The Centre for Evidence-Based Medicine (CEBM) The University of Oxford

Search date: 10/05/2020 (142 articles)

vitamin D 1  
vitamin D2 0  
vitamin D3 0  
ergocalciferol 0  
cholecalciferol 0  
coleciferol 0  
25(OH)D 0  
25OHD 0  
25(OH)D3 0  
25OHD3 0



1  
2  
3 hypovitaminosis D 0  
4 Vitamin D Deficiency 0  
5  
6  
7

8 **Database of publications on coronavirus disease (COVID-19) developed by WHO**

9 [https://www.who.int/emergencies/diseases/novel-coronavirus-2019/global-research-on-novel-](https://www.who.int/emergencies/diseases/novel-coronavirus-2019/global-research-on-novel-coronavirus-2019-ncov)  
10 [coronavirus-2019-ncov](https://www.who.int/emergencies/diseases/novel-coronavirus-2019/global-research-on-novel-coronavirus-2019-ncov)

11  
12 Search date: 10/05/2020 (15,253 entries)  
13

14 Search: Title, Abstract, Subject  
15

16  
17 vitamin D 19  
18 vitamin D2 0  
19 vitamin D3 2  
20 ergocalciferol 0  
21 cholecalciferol 1  
22 colecalciferol 0  
23 25(OH)D 0  
24 25OHD 0  
25 25(OH)D3 0  
26 25OHD3 0  
27  
28 hypovitaminosis D 1  
29 Vitamin D Deficiency 2  
30

31 Total: 25

32 After de-duplication: 20  
33  
34  
35

36 **Searches for systematic reviews, for reference checking**

37  
38 **Medline**  
39

40 Search date: 19/05/2020

41 Database: Ovid MEDLINE(R) ALL <1946 to May 18, 2020>

42 Search Strategy:  
43  
44

- 45 1 exp Vitamin D/ (58577)  
46 2 Vitamin D Deficiency/ (15588)  
47 3 (vitamin D? or vit D? or D vitamin? or ergocalciferol or cholecalciferol or colecalciferol or  
48 calciferol or dihydroergocalciferol or sitocalciferol or dihydrotachysterol or dihydroxycholecalciferol?  
49 or hydroxycholecalciferol? or "25(OH)D?" or 25OHD? or calcidiol or hydroxyergocalciferol or  
50 alfalcidol or alphacalcidol or "1,25(OH)2D" or hydroxyvitamin D? or dihydroxyvitamin D?).ab,kf,ti.  
51 (78395)  
52 4 (paricalcitol or doxercalciferol or doxerocalciferol or calcifediol or calcitriol).ab,kf,ti. (5588)  
53 5 hypovitaminosis D?.ab,kf,ti. (1780)  
54 6 ((D or D2 or D3) adj3 supplement\*).ab,kf,ti. (12198)  
55 7 1 or 2 or 3 or 4 or 5 or 6 (92747)  
56 8 coronavirus/ or betacoronavirus/ or betacoronavirus 1/ or coronavirus oc43, human/ or middle  
57 east respiratory syndrome coronavirus/ or sars virus/ (8161)  
58 9 coronavirus infections/ or severe acute respiratory syndrome/ (11614)  
59  
60

1  
2  
3 10 (((corona\* or corono\*) adj1 (virus\* or viral\* or virinae\*)) or coronavirus\* or coronovirus\* or  
4 coronavirinae\* or Coronavirus\* or Coronovirus\* or Wuhan\* or Hubei\* or Huanan or "2019-nCoV" or  
5 2019nCoV or nCoV2019 or "nCoV-2019" or "COVID-19" or COVID19 or "CORVID-19" or CORVID19 or  
6 "WN-CoV" or WNCov or "HCoV-19" or HCoV19 or CoV or "2019 novel\*" or Ncov or "n-cov" or "SARS-  
7 CoV-2" or "SARSCoV-2" or "SARSCoV2" or "SARS-CoV2" or SARSCov19 or "SARS-Cov19" or "SARSCov-  
8 19" or "SARS-Cov-19" or Ncovor or Ncorona\* or Ncorono\* or NcovWuhan\* or NcovHubei\* or  
9 NcovChina\* or NcovChinese\*).ab,kf,ti. (31115)  
10  
11 11 (severe acute respiratory syndrome or SARS or Middle East respiratory syndrome or  
12 MERS).ab,kf,ti. (17795)  
13 12 (betacoronavirus\* or betacoronavirinae\*).ab,kf,ti. (294)  
14 13 exp Respiratory Tract Infections/ (356696)  
15 14 (acute respiratory infection\* or severe respiratory infection\* or acute respiratory tract  
16 infection\* or severe respiratory tract infection\* or influenza or common cold or pneumonia or  
17 bronchitis).ab,kf,ti. (234266)  
18  
19 15 8 or 9 or 10 or 11 or 12 or 13 or 14 (503079)  
20 16 7 and 15 (1062)  
21 17 (metaanalys\* or "meta analys\*" or "meta-analys\*").tw. (169008)  
22 18 (systematic\* adj3 review\*).mp. (200684)  
23 19 meta analysis.pt. (114746)  
24 20 17 or 18 or 19 (301767)  
25 21 16 and 20 (55)  
26  
27  
28

## Embase

31 Search date: 19/05/2020

33 Database: Embase Classic+Embase <1947 to 2020 Week 20>

34 Search Strategy:

35 -----  
36  
37 1 exp vitamin D/ (147053)  
38 2 vitamin D deficiency/ (30106)  
39 3 (vitamin D? or vit D? or D vitamin? or ergocalciferol or cholecalciferol or colecalciferol or  
40 calciferol or dihydroergocalciferol or sitocalciferol or dihydrotachysterol or dihydroxycholecalciferol?  
41 or hydroxycholecalciferol? or "25(OH)D?" or 25OHD? or calcidiol or hydroxyergocalciferol or  
42 alfalcidol or alphacalcidol or "1,25(OH)2D" or hydroxyvitamin D? or dihydroxyvitamin D?).ab,kw,ti.  
43 (118981)  
44 4 (paricalcitol or doxercalciferol or doxerocalciferol or calcifediol or calcitriol).ab,kw,ti. (8485)  
45 5 hypovitaminosis D?.ab,kw,ti. (3033)  
46 6 ((D or D2 or D3) adj3 supplement\*).ab,kw,ti. (19335)  
47 7 1 or 2 or 3 or 4 or 5 or 6 (172654)  
48 8 betacoronavirus 1/ or betacoronavirus/ or human coronavirus oc43/ (1085)  
49 9 Middle East respiratory syndrome coronavirus/ (2082)  
50 10 sars-related coronavirus/ or sars coronavirus/ (6062)  
51 11 Coronavirinae/ (2060)  
52 12 coronavirus infection/ or middle east respiratory syndrome/ or severe acute respiratory  
53 syndrome/ (12565)  
54  
55 13 (((corona\* or corono\*) adj1 (virus\* or viral\* or virinae\*)) or coronavirus\* or coronovirus\* or  
56 coronavirinae\* or Coronavirus\* or Coronovirus\* or Wuhan\* or Hubei\* or Huanan or "2019-nCoV" or  
57 2019nCoV or nCoV2019 or "nCoV-2019" or "COVID-19" or COVID19 or "CORVID-19" or CORVID19 or  
58 "WN-CoV" or WNCov or "HCoV-19" or HCoV19 or CoV or "2019 novel\*" or Ncov or "n-cov" or "SARS-  
59  
60

1  
2  
3 CoV-2" or "SARSCoV-2" or "SARSCoV2" or "SARS-CoV2" or SARSCov19 or "SARS-Cov19" or "SARSCov-  
4 19" or "SARS-Cov-19" or Ncovor or Ncorona\* or Ncorono\* or NcovWuhan\* or NcovHubei\* or  
5 NcovChina\* or NcovChinese\*).ab,kw,ti. (30532)  
6 14 (severe acute respiratory syndrome or SARS or Middle East respiratory syndrome or  
7 MERS).ab,kw,ti. (17954)  
8 15 (betacoronavirus\* or betacoronavirinae\*).ab,kw,ti. (286)  
9 16 exp respiratory tract infection/ (460049)  
10 17 (acute respiratory infection\* or severe respiratory infection\* or acute respiratory tract  
11 infection\* or severe respiratory tract infection\* or influenza or common cold or pneumonia or  
12 bronchitis).ab,kw,ti. (329779)  
13 18 8 or 9 or 10 or 11 or 12 or 13 or 14 or 15 or 16 or 17 (674800)  
14 19 7 and 18 (3315)  
15 20 (metaanalys\* or "meta analys\*" or "meta-analys\*").mp. (294469)  
16 21 (systematic\* adj2 review\*).mp. (330720)  
17 22 20 or 21 (475492)  
18 23 19 and 22 (219)  
19 24 limit 19 to (meta analysis or "systematic review") (145)  
20 25 23 or 24 (219)  
21 26 limit 25 to (conference abstract or conference paper or "conference review" or editorial or  
22 letter) (41)  
23 27 25 not 26 (178)

### Cochrane Database of Systematic Reviews (Cochrane Library)

Search Name: Vitamin D Covid and Acute Respiratory Infections SRs

Date Run: 20/05/2020 18:30:28

Comment:

| ID  | Search                                                                                                                                                                                                                                                                                                                                                                                                                                                | Hits  |
|-----|-------------------------------------------------------------------------------------------------------------------------------------------------------------------------------------------------------------------------------------------------------------------------------------------------------------------------------------------------------------------------------------------------------------------------------------------------------|-------|
| #1  | MeSH descriptor: [Vitamin D] explode all trees                                                                                                                                                                                                                                                                                                                                                                                                        | 5224  |
| #2  | MeSH descriptor: [Vitamin D Deficiency] this term only                                                                                                                                                                                                                                                                                                                                                                                                | 1226  |
| #3  | ((vitamin NEXT D?) or (vit NEXT D?) or (D NEXT vitamin?) or ergocalciferol or cholecalciferol or colecalciferol or calciferol or dihydroergocalciferol or sitocalciferol or dihydrotachysterol or dihydroxycholecalciferol? or hydroxycholecalciferol? or "25(OH)D" or "25(OH)D3" or 25OHD? or calcdiol or hydroxyergocalciferol or alfacalcidol or alphacalcidol or "1,25(OH)2D" or (hydroxyvitamin NEXT D?) or (dihydroxyvitamin NEXT D?)):ti,ab,kw | 12959 |
| #4  | (paricalcitol or doxercalciferol or doxerocalciferol or calcifediol or calcitriol):ti,ab,kw                                                                                                                                                                                                                                                                                                                                                           | 2417  |
| #5  | hypovitaminosis NEXT D?                                                                                                                                                                                                                                                                                                                                                                                                                               | 303   |
| #6  | ((D OR D2 OR D3) NEAR/3 supplement*):ti,ab,kw                                                                                                                                                                                                                                                                                                                                                                                                         | 5632  |
| #7  | #1 or #2 or #3 or #4 or #5 or #6                                                                                                                                                                                                                                                                                                                                                                                                                      | 14461 |
| #8  | MeSH descriptor: [Coronavirus] this term only                                                                                                                                                                                                                                                                                                                                                                                                         | 2     |
| #9  | MeSH descriptor: [Betacoronavirus] this term only                                                                                                                                                                                                                                                                                                                                                                                                     | 2     |
| #10 | MeSH descriptor: [Betacoronavirus 1] this term only                                                                                                                                                                                                                                                                                                                                                                                                   | 0     |
| #11 | MeSH descriptor: [Coronavirus OC43, Human] this term only                                                                                                                                                                                                                                                                                                                                                                                             | 0     |
| #12 | MeSH descriptor: [Middle East Respiratory Syndrome Coronavirus] explode all trees                                                                                                                                                                                                                                                                                                                                                                     | 1     |
| #13 | MeSH descriptor: [SARS Virus] this term only                                                                                                                                                                                                                                                                                                                                                                                                          | 9     |
| #14 | MeSH descriptor: [Coronavirus Infections] this term only                                                                                                                                                                                                                                                                                                                                                                                              | 137   |
| #15 | MeSH descriptor: [Severe Acute Respiratory Syndrome] this term only                                                                                                                                                                                                                                                                                                                                                                                   | 107   |

1  
2  
3 #16 (((corona\* or corono\*) near/1 (virus\* or viral\* or virinae\*)) or coronavirus\* or coronavirus\*  
4 or coronavirinae\* or Coronavirus\* or Coronavirus\* or Wuhan\* or Hubei\* or Huanan or "2019-nCoV"  
5 or 2019nCoV or nCoV2019 or "nCoV-2019" or "COVID-19" or COVID19 or "CORVID-19" or CORVID19  
6 or "WN-CoV" or WNCov or "HCoV-19" or HCoV19 or CoV or "2019 novel\*" or Ncov or "n-cov" or  
7 "SARS-CoV-2" or "SARSCoV-2" or "SARSCoV2" or "SARS-CoV2" or SARSCov19 or "SARS-Cov19" or  
8 "SARSCov-19" or "SARS-Cov-19" or Ncovor or Ncorona\* or Ncorono\* or NcovWuhan\* or NcovHubei\*  
9 or NcovChina\* or NcovChinese\*):ti,ab,kw 616  
10  
11 #17 ("severe acute respiratory syndrome" or SARS or "Middle East respiratory syndrome" or  
12 MERS):ti,ab,kw 351  
13 #18 (betacoronavirus\* or betacoronavirinae\*):ti,ab,kw 4  
14 #19 MeSH descriptor: [Respiratory Tract Infections] explode all trees 14360  
15 #20 (("acute respiratory" NEXT infection\*) or ("severe respiratory" NEXT infection\*) or ("acute  
16 respiratory tract" NEXT infection\*) or ("severe respiratory tract" NEXT infection\*) or influenza or  
17 "common cold" or pneumonia or bronchitis):ti,ab,kw 25944  
18  
19 #21 #8 or #9 or #10 or #11 or #12 or #13 or #14 or #15 or #16 or #17 or #18 or #19 or #20  
20 32554  
21 #22 #7 and #21 329  
22

23 CDSR: 3  
24

#### 25 Expert consultation

26 One additional study identified:  
27

28 Martineau AR, Jolliffe DA, Hooper RL, et al., (2017) Vitamin D supplementation to prevent acute  
29 respiratory tract infections: systematic review and meta-analysis of individual participant data. BMJ.  
30 2017;356:i6583. doi:10.1136/bmj.i6583  
31  
32  
33  
34  
35  
36  
37  
38  
39  
40  
41  
42  
43  
44  
45  
46  
47  
48  
49  
50  
51  
52  
53  
54  
55  
56  
57  
58  
59  
60

## 2. Full details of the study eligibility criteria

| Include                                                                                                                                                                                                                                                                                                                                                                                                                                                                                                                                                                                                                                                                                                                                                                                                                                                                                                                                                                                                                                                                                                                                                                                                                                                                                                                                                                                                                                                                                                                                        | Exclude                                                                                                                                                                                                                 |
|------------------------------------------------------------------------------------------------------------------------------------------------------------------------------------------------------------------------------------------------------------------------------------------------------------------------------------------------------------------------------------------------------------------------------------------------------------------------------------------------------------------------------------------------------------------------------------------------------------------------------------------------------------------------------------------------------------------------------------------------------------------------------------------------------------------------------------------------------------------------------------------------------------------------------------------------------------------------------------------------------------------------------------------------------------------------------------------------------------------------------------------------------------------------------------------------------------------------------------------------------------------------------------------------------------------------------------------------------------------------------------------------------------------------------------------------------------------------------------------------------------------------------------------------|-------------------------------------------------------------------------------------------------------------------------------------------------------------------------------------------------------------------------|
| <p><b>P- Population</b></p> <ol style="list-style-type: none"> <li>1) Patients acutely ill with Betacoronavirus infection [SARS-CoV, MERS-CoV, SARS-CoV-2]</li> <li>2) or at risk of acute illness with Betacoronavirus infection</li> </ol> <p><b>I – Intervention/exposure</b></p> <ol style="list-style-type: none"> <li>1) Vitamin D supplementation</li> <li>2) Low Serum Vitamin D</li> </ol> <p><b>O - Outcomes</b></p> <ol style="list-style-type: none"> <li>1) Betacoronavirus infection (to include serological evidence of infection or clinically confirmed symptomatic infection);</li> <li>2) severity of Betacoronavirus infection (to include patients admitted to hospital or admitted to intensive care); mortality due to Betacoronavirus.</li> <li>3) Mortality due to Betacoronavirus</li> </ol> <p><b>C – Comparator</b></p> <ol style="list-style-type: none"> <li>1) No Vitamin D supplementation</li> <li>2) high or normal Serum Vitamin D</li> </ol> <p><b>S - Study design</b><br/>Randomised controlled trials and non-randomized studies will be eligible for inclusion in the review including, non randomized controlled trials, interrupted time series, controlled before-and-after studies, cohort studies, ecological studies, case reports and case series.</p> <p><b>Subgroups</b></p> <ol style="list-style-type: none"> <li>1. Ethnicity characteristics (White British, All Other White, Mixed, Asian, Black, Other)</li> <li>2. Age characteristics (population by five-year age groups)</li> </ol> | <p>Animals studies, modelling studies</p> <p>Qualitative studies, Non-primary research- reviews, editorials etc, guidelines and non-systematic reviews.</p> <p>Non-English language. Non peer reviewed publication.</p> |

### 3. List of studies excluded at full text review

|    | Excluded studies                                                                                                                                                                                                                                                                                                            | Reason                                                 |
|----|-----------------------------------------------------------------------------------------------------------------------------------------------------------------------------------------------------------------------------------------------------------------------------------------------------------------------------|--------------------------------------------------------|
| 1  | Adams, K. K., et al. (2020). "Myth Busters: Dietary Supplements and COVID-19." <u>Annals of Pharmacotherapy</u> : 1060028020928052.                                                                                                                                                                                         | Study design – commentary                              |
| 2  | Ahmed, I., et al. (2020). "First Covid-19 maternal mortality in the UK associated with thrombotic complications." <u>British Journal of Haematology</u> . <b>18</b> .                                                                                                                                                       | Study design – letter                                  |
| 3  | Alpalhao, M. and P. Filipe (2020). "SARS-CoV-2 pandemic and Vitamin D deficiency - a double trouble." <u>Photodermatology, Photoimmunology &amp; Photomedicine</u> <b>01</b> : 01.                                                                                                                                          | Study design – letter                                  |
| 4  | Annweiler, C., et al. (2020). COvid-19 and Vitamin D Supplementation: a Multicenter Randomized Controlled Trial of High Dose Versus Standard Dose Vitamin D3 in High-risk COVID-19 Patients (CoVitTrial). <a href="https://clinicaltrials.gov/show/NCT04344041">https://clinicaltrials.gov/show/NCT04344041</a> .           | Study design – on-going RCT completion date. July 2020 |
| 5  | Arya, A. and V. D. Dwivedi (2020). "Synergistic effect of vitamin D and remdesivir can fight COVID-19." <u>Journal of Biomolecular Structure &amp; Dynamics</u> : 1-2                                                                                                                                                       | Study design – letter                                  |
| 6  | Banerjee, D., et al. (2020). "COVID-19 infection in kidney transplant recipients." <u>Kidney International</u> <b>97</b> (6): 1076-1082.                                                                                                                                                                                    | Study design – commentary                              |
| 7  | Caccialanza, R., et al. (2020). Early nutritional supplementation in non-critically ill patients hospitalized for the 2019 novel coronavirus disease (COVID-19): Rationale and feasibility of a shared pragmatic protocol. <u>Nutrition</u> : 110835.                                                                       | Study design - protocol                                |
| 8  | Calder, P. C., et al. (2020). Optimal Nutritional Status for a Well-Functioning Immune System Is an Important Factor to Protect against Viral Infections. <u>Nutrients</u> : <b>12</b> (4), 1181.                                                                                                                           | Study design -narrative review                         |
| 9  | Cao, Z., et al. (2020). SARS-CoV-2 & Covid-19: Key-Roles of the 'Renin-Angiotensin' System / Vitamin D Impacting Drug and Vaccine Developments. <u>Infectious Disorders - Drug Targets</u> . (E-pub Ahead of Print) DOI : <a href="https://doi.org/10.2174/1871526520999200505174704">10.2174/1871526520999200505174704</a> | Study design – editorial                               |
| 10 | Carter, S. J., et al. (2020). Considerations for obesity, vitamin D, and physical activity amidst the COVID-19 pandemic. <u>Obesity</u> <b>16</b> : 16.                                                                                                                                                                     | Study design -narrative review                         |

|    |                                                                                                                                                                                                                                                                                                              |                                                  |
|----|--------------------------------------------------------------------------------------------------------------------------------------------------------------------------------------------------------------------------------------------------------------------------------------------------------------|--------------------------------------------------|
| 11 | Daneshkhah, A., et al. (2020). The Possible Role of Vitamin D in Suppressing Cytokine Storm and Associated Mortality in COVID-19 Patients. <u>medRxiv</u> . DOI: <a href="https://doi.org/10.1101/2020.04.08.20058578">https://doi.org/10.1101/2020.04.08.20058578</a>                                       | Study design – modelling                         |
| 12 | Davies G, Garami AR, Byers JC. Evidence Supports a Causal Model for Vitamin D in COVID-19 Outcomes. <u>medRxiv</u> , 2020. DOR: <a href="https://doi.org/10.1101/2020.05.01.20087965v3">https://doi.org/10.1101/2020.05.01.20087965v3</a>                                                                    | Study design – modelling                         |
| 13 | de Lucena, T. M. C., et al. (2020). "Mechanism of inflammatory response in associated comorbidities in COVID-19." <u>Diabetes &amp; Metabolic Syndrome</u> <b>14</b> (4): 597-600.                                                                                                                           | Study design -narrative review                   |
| 14 | Eroglu, C., et al. (2019). The relation between serum vitamin D levels, viral infections and severity of attacks in children with recurrent wheezing. <u>Allergologia et Immunopathologia</u> <b>47</b> (6): 591-597.                                                                                        | Population - Not COVID-19/SARs/MERs              |
| 15 | Faul, J. L., et al. (2020). "Vitamin d deficiency and ards after sars-cov-2 infection." <u>Irish Medical Journal</u> <b>113</b> (5).                                                                                                                                                                         | Study design – letter                            |
| 16 | Ghasemian, R., et al. (2020). "The Role of Vitamin D in The Age of COVID-19: A Systematic Review and Meta-Analysis Along with an Ecological Approach." <u>MedRxiv : the Preprint Server for Health Sciences</u> . DOI: <a href="https://doi.org/10.1101/2020.06.05.20123554">10.1101/2020.06.05.20123554</a> | Study design -narrative review                   |
| 17 | Grant, W. B., et al. (2020). Evidence that Vitamin D Supplementation Could Reduce Risk of Influenza and COVID-19 Infections and Deaths. <u>Nutrients</u> <b>12</b> (4): 02.                                                                                                                                  | Study design -narrative review                   |
| 18 | Heiser, K., et al. (2020). Identification of potential treatments for COVID-19 through artificial intelligence-enabled phenomic analysis of human cells infected with SARS-CoV-2. <u>bioRxiv</u> : 2020.2004.2021.054387.                                                                                    | Study design – modelling                         |
| 19 | Hribar, C. A., et al. (2020). "Potential Role of Vitamin D in the Elderly to Resist COVID-19 and to Slow Progression of Parkinson's Disease." <u>Brain Sciences</u> <b>10</b> (5): 08.                                                                                                                       | Study design -narrative review                   |
| 20 | Jakovac, H. (2020). COVID-19 and vitamin D-Is there a link and an opportunity for intervention? <u>American Journal of Physiology - Endocrinology &amp; Metabolism</u> <b>318</b> (5): E589-E589.                                                                                                            | Study design – letter                            |
| 21 | Jamaati, H., et al. (2020). A fourteen-day experience with coronavirus disease 2019 (COVID-19) induced acute respiratory distress syndrome (ARDS): An Iranian treatment protocol. <u>Iranian Journal of Pharmaceutical Research</u> <b>19</b> (1): 31-36.                                                    | Study design – treatment protocol/recommendation |
| 22 | Kalippurayil Moozhipurath, R., et al. (2020). "Evidence of Protective Role of Ultraviolet-B (UVB) Radiation in                                                                                                                                                                                               | Exposure – not vitamin D( UVB)                   |



|    |                                                                                                                                                                                                                                                                                                        |                                             |
|----|--------------------------------------------------------------------------------------------------------------------------------------------------------------------------------------------------------------------------------------------------------------------------------------------------------|---------------------------------------------|
|    | Reducing COVID-19 Deaths." <u>MedRxiv : the Preprint Server for Health Sciences</u> .<br>DOI 10.1101/2020.05.06.20093419                                                                                                                                                                               |                                             |
| 23 | Kara, M., et al. (2020). "'Scientific Strabismus' or Two Related Pandemics: COVID-19 & Vitamin D Deficiency." <u>British Journal of Nutrition</u> : 1-20.                                                                                                                                              | Study design -narrative review              |
| 24 | Koivisto, O., et al. (2020). Key Vitamin D Target Genes with Functions in the Immune System. <u>Nutrients</u> , <b>12</b> (4):1140.                                                                                                                                                                    | Population - Outcomes - target genes        |
| 25 | Kow, C. S., et al. (2020). "Vitamin D Supplementation in Influenza and COVID-19 Infections Comment on: "Evidence that Vitamin D Supplementation Could Reduce Risk of Influenza and COVID-19 Infections and Deaths" <u>Nutrients</u> 2020, 12(4), 988." <u>Nutrients</u> <b>12</b> (6): 01.             | Study design – commentary                   |
| 26 | Kumar, V. and A. Srivastava (2020). "Spurious Correlation? A review of the relationship between Vitamin D and Covid-19 infection and mortality." <u>MedRxiv : the Preprint Server for Health Sciences</u> . DOI: 10.1101/2020.05.25.20110338                                                           | Study design -narrative review              |
| 27 | Laird, E., et al. (2020). "Vitamin D and inflammation: Potential implications for severity of Covid-19." <u>Irish Medical Journal</u> <b>113</b> (5).                                                                                                                                                  | Study design -narrative review              |
| 28 | La Vignera, S., et al. (2020). Sex-Specific SARS-CoV-2 Mortality: Among Hormone-Modulated ACE2 Expression, Risk of Venous Thromboembolism and Hypovitaminosis D. <u>International journal of molecular sciences</u> <b>21</b> (8):2948.                                                                | Study design – editorial                    |
| 29 | Li, A. Y., et al. (2020). Multivariate Analysis of Factors Affecting COVID-19 Case and Death Rate in U.S. Counties: The Significant Effects of Black Race and Temperature. <u>medRxiv</u> . DOI: <a href="https://doi.org/10.1101/2020.04.17.20069708">https://doi.org/10.1101/2020.04.17.20069708</a> | Intervention – not Vitamin D                |
| 30 | Maestri, E., et al. (2020). Vitamin D and coronavirus: a new field of use?. <u>Recenti Progressi in Medicina</u> <b>111</b> (4): 253-256.                                                                                                                                                              | Study design -narrative review, non-English |
| 31 | Mansbach, J. M. and C. A. Camargo Jr., (2009). Respiratory Viruses in Bronchiolitis and Their Link to Recurrent Wheezing and Asthma. <u>Clinics in Laboratory Medicine</u> <b>29</b> (4): 741-755.                                                                                                     | Population - Not COVID-19/SARs/MERS         |
| 32 | Marik, P. E., et al. (2020). Does vitamin D status impact mortality from SARS-CoV-2 infection? <u>Medicine in Drug Discovery</u> : 100041-100041.                                                                                                                                                      | Study design - commentary                   |
| 33 | McKenna, M. J. and M. A. T. Flynn (2020). "Covid-19, cocooning and vitamin d intake requirements." <u>Irish Medical Journal</u> <b>113</b> (5).                                                                                                                                                        | Study design -narrative review              |



|    |                                                                                                                                                                                                                                                     |                                               |
|----|-----------------------------------------------------------------------------------------------------------------------------------------------------------------------------------------------------------------------------------------------------|-----------------------------------------------|
| 34 | Mitchell, F. (2020). "Vitamin-D and COVID-19: do deficient risk a poorer outcome?" <u>The Lancet Diabetes &amp; Endocrinology</u> <b>20</b> : 20.                                                                                                   | Study design -narrative review                |
| 35 | Molloy, E. J. and N. Murphy (2020). Vitamin D, Covid-19 and Children. <u>Irish Medical Journal</u> <b>113</b> (4): 64.                                                                                                                              | Study design -narrative review                |
| 36 | McCartney, D. M. and D. G. Byrne (2020). Optimisation of Vitamin D Status for Enhanced Immuno-protection Against Covid-19. <u>Irish Medical Journal</u> <b>113</b> (4): 58.                                                                         | Study design -narrative review                |
| 37 | Rabbitt, L. and E. Slattery (2020). "Vitamin d and covid-19: A note of caution." <u>Irish Medical Journal</u> <b>113</b> (5).                                                                                                                       | Study design - letter                         |
| 38 | Ribeiro, H., et al. (2020). "Does Vitamin D play a role in the management of Covid-19 in Brazil?" <u>Revista de Saude Publica</u> <b>54</b> : 53.                                                                                                   | Study design -narrative review                |
| 39 | Romano, L., et al. (2020). "Short Report - Medical nutrition therapy for critically ill patients with COVID-19." <u>European Review for Medical and Pharmacological Sciences</u> <b>24</b> (7): 4035-4039.                                          | Study design -narrative review                |
| 40 | Silberstein, M. (2020). Vitamin D: A simpler alternative to tocilizumab for trial in COVID-19? <u>Medical Hypotheses</u> <b>140</b> : 109767-109767.                                                                                                | Study design -narrative review                |
| 41 | Speeckaert, M. M. and J. R. Delanghe (2020). "Association between low vitamin D and COVID-19: don't forget the vitamin D binding protein." <u>Aging Clinical &amp; Experimental Research</u> <b>28</b> : 28.                                        | Study design - letter                         |
| 42 | Skutsch, M., et al. (2020). "The association of UV with rates of COVID-19 transmission and deaths in Mexico: the possible mediating role of vitamin D." <u>MedRxiv : the Preprint Server for Health Sciences</u> . DOI: 10.1101/2020.05.25.20112805 | Study design – modelling                      |
| 43 | Suresh, P. S. (2020). "Hypovitaminosis D and COVID-19: Matter of Concern in India?" <u>Indian Journal of Clinical Biochemistry</u> .                                                                                                                | Study design - letter                         |
| 44 | Taghizadieh, A., et al. (2020). "Acute kidney injury in pregnant women following SARS-CoV-2 infection: A case report from Iran." <u>Respiratory Medicine Case Reports</u> <b>30</b>                                                                 | Exposure – not vitamin D                      |
| 45 | Tan, S. H. S., et al. (2020). "Medications in COVID-19 patients: summarizing the current literature from an orthopaedic perspective." <u>International Orthopaedics</u> <b>22</b> : 22.                                                             | Study design -narrative review                |
| 46 | Yalaki, Z., et al. (2019). Comparison of viral agents and vitamin D levels in children with acute bronchiolitis infection. <u>Cocuk Enfeksiyon Dergisi</u> <b>13</b> (1): e14-e20.                                                                  | Population - COVID-19/SARs/MERs not specified |
| 47 | Zabetakis, I., et al. (2020). "COVID-19: The Inflammation Link and the Role of Nutrition in Potential Mitigation." <u>Nutrients</u> <b>12</b> (5): 19.                                                                                              | Study design -narrative review                |

|    |                                                                                                                                          |                           |
|----|------------------------------------------------------------------------------------------------------------------------------------------|---------------------------|
| 48 | Zemb, P., et al. (2020). "Vitamin D deficiency and COVID-19 pandemic." <u>Journal of Global Antimicrobial Resistance</u> <b>28</b> : 28. | Study design - commentary |
|----|------------------------------------------------------------------------------------------------------------------------------------------|---------------------------|

#### 4. Articles included at full text, but later excluded at time of narrative synthesis

|    |                                                                                                                                                                                                                                                                                                                                                                                                                      |                                                              |
|----|----------------------------------------------------------------------------------------------------------------------------------------------------------------------------------------------------------------------------------------------------------------------------------------------------------------------------------------------------------------------------------------------------------------------|--------------------------------------------------------------|
| 49 | Darling, A. L., et al. (2020). Vitamin D status, body mass index, ethnicity and COVID-19: Initial analysis of the first-reported UK Biobank COVID-19 positive cases (n 580) compared with negative controls (n 723). <u>medRxiv</u> .<br><br><a href="https://www.medrxiv.org/content/10.1101/2020.04.29.20084277v1?versioned=TRUE">https://www.medrxiv.org/content/10.1101/2020.04.29.20084277v1?versioned=TRUE</a> | Not peer reviewed publication at time of narrative synthesis |
| 50 | De Smet, D., et al. (2020). Vitamin D deficiency as risk factor for severe COVID-19: a convergence of two pandemics. <u>medRxiv</u> .<br><br><a href="https://www.medrxiv.org/content/10.1101/2020.05.01.20079376v2">https://www.medrxiv.org/content/10.1101/2020.05.01.20079376v2</a>                                                                                                                               | Not peer reviewed publication at time of narrative synthesis |
| 51 | Lau, F. H., et al. (2020). Vitamin D Insufficiency is Prevalent in Severe COVID-19. <u>medRxiv</u> .<br><br><a href="https://www.medrxiv.org/content/10.1101/2020.04.24.20075838v1?versioned=TRUE">https://www.medrxiv.org/content/10.1101/2020.04.24.20075838v1?versioned=TRUE</a>                                                                                                                                  | Not peer reviewed publication at time of narrative synthesis |
| 52 | Meltzer, D. O., et al. (2020). "Association of Vitamin D Deficiency and Treatment with COVID-19 Incidence." <u>MedRxiv : the Preprint Server for Health Sciences</u> <b>13</b> : 13.<br><br><a href="https://www.medrxiv.org/content/10.1101/2020.05.08.20095893v1">https://www.medrxiv.org/content/10.1101/2020.05.08.20095893v1</a>                                                                                | Not peer reviewed publication at time of narrative synthesis |
| 53 | Notari, A. and G. Torrieri (2020). "COVID-19 transmission risk factors." <u>MedRxiv : the Preprint Server for Health Sciences</u> .<br><br><a href="https://www.medrxiv.org/content/10.1101/2020.05.08.20095083v1?versioned=TRUE">https://www.medrxiv.org/content/10.1101/2020.05.08.20095083v1?versioned=TRUE</a>                                                                                                   | Not peer reviewed publication at time of narrative synthesis |
| 54 | Raisi-Estabragh, Z., et al. (2020). "Greater risk of severe COVID-19 in non-White ethnicities is not explained by cardiometabolic, socioeconomic, or behavioural factors, or by 25(OH)-vitamin D status: study of 1,326 cases from the UK Biobank." <u>MedRxiv : the Preprint Server for Health Sciences</u> .                                                                                                       | Not peer reviewed publication at time of                     |

|    |                                                                                                                                                                                                                                                                                                                                                                                                       |                                                              |
|----|-------------------------------------------------------------------------------------------------------------------------------------------------------------------------------------------------------------------------------------------------------------------------------------------------------------------------------------------------------------------------------------------------------|--------------------------------------------------------------|
|    | <a href="https://www.medrxiv.org/content/10.1101/2020.06.01.20118943v1?versioned=TRUE">https://www.medrxiv.org/content/10.1101/2020.06.01.20118943v1?versioned=TRUE</a>                                                                                                                                                                                                                               | narrative synthesis                                          |
| 55 | Tan, C. W., et al. (2020). "A cohort study to evaluate the effect of combination Vitamin D, Magnesium and Vitamin B12 (DMB) on progression to severe outcome in older COVID-19 patients." <u>MedRxiv : the Preprint Server for Health Sciences</u> .<br><br><a href="https://www.medrxiv.org/content/10.1101/2020.06.01.20112334v2">https://www.medrxiv.org/content/10.1101/2020.06.01.20112334v2</a> | Not peer reviewed publication at time of narrative synthesis |

For peer review only

| Study details of the seven articles included at full text, but excluded at time of narrative synthesis |                                                                                           |                                                                                                                                                                                                                                                                                                                                                                                                                                                  |                                                                                                                                                                                      |                      |                                                                                                                                                                                                                                                                                                                                                                                                                                                                                                                                            |                                                                                                                                                                                                                        |
|--------------------------------------------------------------------------------------------------------|-------------------------------------------------------------------------------------------|--------------------------------------------------------------------------------------------------------------------------------------------------------------------------------------------------------------------------------------------------------------------------------------------------------------------------------------------------------------------------------------------------------------------------------------------------|--------------------------------------------------------------------------------------------------------------------------------------------------------------------------------------|----------------------|--------------------------------------------------------------------------------------------------------------------------------------------------------------------------------------------------------------------------------------------------------------------------------------------------------------------------------------------------------------------------------------------------------------------------------------------------------------------------------------------------------------------------------------------|------------------------------------------------------------------------------------------------------------------------------------------------------------------------------------------------------------------------|
| Study                                                                                                  | Design/<br>setting                                                                        | Population                                                                                                                                                                                                                                                                                                                                                                                                                                       | Exposure/Intervention                                                                                                                                                                | Outcomes             | Results                                                                                                                                                                                                                                                                                                                                                                                                                                                                                                                                    | Limitations                                                                                                                                                                                                            |
| Darling, A. L., et al. (2020).                                                                         | Retrospective cohort study<br><br>UK Biobank England cohort only                          | COVID-19 positive cases (n 580) Mean age 57.5 (SD 9.7)<br><br>COVID-19 negative controls (n 723) Mean age 57.9 (SD 8.7)                                                                                                                                                                                                                                                                                                                          | Serum 25(OH)D status Median (IQR) nmol/L<br><br>by gender (Male/Female), body mass index (Normal/underweight, overweight, obesity), ethnicity (Asian, Black, Mixed and Other, White) | COVID-19 test result | Serum 25(OH)D status similar in both groups:<br><br>COVID-19 positive cases (median IQR) = 43.3 (32.1) nmol/L<br><br>COVID-19 negative controls (median (IQR) 44.1 (31.2) nmol/L) for COVID-19.<br><br>A logistic regression model suggests that being overweight (OR 1.51 CI 1.13-2.02) or obese (OR 1.67 CI 1.24-2.26); living in London (OR 1.45 CI 1.05-2.00); being male (OR 1.28 CI 1.01-1.61) and being of Asian, Black or Mixed ethnicity (OR 1.66 CI 1.08-2.54) is associated with a higher odds of testing positive for COVID-19 | UK Biobank baseline samples collected in 2006-2010.                                                                                                                                                                    |
| De Smet, D., et al. (2020).                                                                            | Retrospective observational study<br><br>Central network hospital, West Flanders, Belgium | 186 SARS-CoV-2 infected patients hospitalised from March 1, 2020 to April 7, 2020<br><br>(109 males [median age 68 years, IQR 53-79] 77 females [median age 71 years, IQR 65-74])<br><br>25(OH)D in COVID-19 patients was compared a control group of 2717 patients with similar age distribution, sampled from March 1, 2019 to April 30, 2019. (999 males [median age 69 years, IQR 53-81] and 1718 females [median age 68 years, IQR 43-83]). | 25(OH)D levels                                                                                                                                                                       | SARS-CoV-2 infection | COVID-19 patients had a lower median 25(OH)D on admission (18.6 ng/mL, IQR 12.6-25.3) than controls (21.5 ng/mL, IQR 13.9-20.8, P=0.0016) and a higher percentage of vitamin D deficiency (defined as 25(OH)D < 20ng/mL): 58.6% versus 45.2% (P=0.0005).<br><br>In male COVID-19 patients, vitamin D deficiency was lower median 25(OH)D (17.6 ng/mL, IQR 12.7-24.0 versus 20.3 ng/mL, IQR 13.7-28.3, P=0.0234) and a higher deficiency rate (67.0% versus 49.2%, P=0.0006) than male controls.                                            | The prevalence and age/sex/seasonal-distribution of vitamin D status was derived from the general population sampled from 16274 consecutive, unselected and unique patients from January 1, 2019 to December 31, 2019. |

|                                       |                                                                                                                                           |                                                                                                                                                                                                                                                                                                                  |                                                                                                                                                                                                                                                                                                                                                                                                                                                                                                                                                  |                                      |                                                                                                                                                                                                                                                                                                                                                                                                                                                                                                                                                                                                                                                                                                                                                       |                                                                                                                                                                                                                                                                                       |
|---------------------------------------|-------------------------------------------------------------------------------------------------------------------------------------------|------------------------------------------------------------------------------------------------------------------------------------------------------------------------------------------------------------------------------------------------------------------------------------------------------------------|--------------------------------------------------------------------------------------------------------------------------------------------------------------------------------------------------------------------------------------------------------------------------------------------------------------------------------------------------------------------------------------------------------------------------------------------------------------------------------------------------------------------------------------------------|--------------------------------------|-------------------------------------------------------------------------------------------------------------------------------------------------------------------------------------------------------------------------------------------------------------------------------------------------------------------------------------------------------------------------------------------------------------------------------------------------------------------------------------------------------------------------------------------------------------------------------------------------------------------------------------------------------------------------------------------------------------------------------------------------------|---------------------------------------------------------------------------------------------------------------------------------------------------------------------------------------------------------------------------------------------------------------------------------------|
| <p>Lau, F. H., et al. (2020).</p>     | <p>Retrospective observational study</p> <p>A single, tertiary care academic (university) medical centre, Louisiana, New Orleans, USA</p> | <p>COVID-19 ICU patients (n 13)<br/>Mean age 61.5 (SD 15.7)</p> <p>COVID-19 floor patients (n 7)<br/>Mean age 72.0 (SD 14.8)</p> <p>Medical records of COVID-19 patients between March 27, 2020 and April 21, 2020</p> <p>Vitamin D insufficiency (VDI) and COVID-19 metrics in ICU vs. floor patients</p>       | <p>VDI: defined as serum 25(OH) D &lt; 30 ng/mL</p> <p>Serum 25(OH) D status Mean (SD) ng/mL</p> <p>by gender (Male/Female), body mass index (Normal, obesity), race (African American), age (elderly&gt;65 years), hypertension</p>                                                                                                                                                                                                                                                                                                             | <p>COVID-19 metrics</p>              | <p>Overall, few significant differences were identified between ICU and floor patients: Lactate dehydrogenase was significantly higher among ICU patients (441.8 vs. 223.0, P=0.001). Also, body mass index was significantly higher among ICU patients (35.2 vs. 24.5, P=0.02).</p> <p>Among ICU subjects, 11 (84.6%) had VDI, vs. 4 (57.1%) of floor subjects. 100% of ICU patients less than 75 years old had VDI (n=11). Among these, 64.6% (n=7) had critically low 25(OH) D (&lt;20 ng/mL) and 3 had &lt;10 ng/mL.</p> <p>VDI is highly prevalent in dark-skinned people (82.1% of African Americans vs. 41.6% overall).</p> <p>Male/Female ratio was 1.24 and 1.44 for COVID-19 and VDI respectively.</p>                                      | <p>Statistical analysis was limited by the small number of subjects.</p>                                                                                                                                                                                                              |
| <p>Meltzer, D. O., et al. (2020).</p> | <p>Retrospective cohort study</p> <p>University of Chicago Medicine, USA</p>                                                              | <p>4,314 patients tested for COVID-19 from 3/3/2020 to 4/10/2020. Among these, 499 had a vitamin D level in the year before testing.</p> <p>COVID-19 positive cases with vitamin D deficient (n 178)<br/>Mean age 45.6</p> <p>COVID-19 positive cases with not vitamin D deficient (n 321)<br/>Mean age 50.7</p> | <p>Vitamin D deficiency: defined by the most recent 25(OH) D &lt;20ng/ml or 1,25-dihydroxycholecalciferol &lt;18pg/ml within 1 year before COVID-19 testing. Treatment: defined by the most recent vitamin D type and dose, and treatment changes between the time of the most recent vitamin D level and time of COVID-19 testing</p> <p>Vitamin D deficiency and treatment changes were combined to categorize vitamin D status at the time of COVID-19 testing as:<br/>1) Likely deficient (last-level-deficient/treatment-not-increased)</p> | <p>Testing positive for COVID-19</p> | <p>In multivariable analysis, testing positive for COVID-19 was associated with increasing age (RR (age&lt;50)=1.05, P&lt;0.021; RR (age≥50)=1.02, P&lt;0.064), non-white race (RR=2.54, P&lt;0.01) and being likely vitamin D deficient (deficient/treatment-not-increased: RR=1.77, P&lt;0.02) as compared to likely vitamin D sufficient (not-deficient/treatment-not-decreased), with predicted COVID-19 rates in the vitamin D deficient group of 21.6% (95%CI [14.0%-29.2%] ) vs 12.2% (95%CI [8.9%-15.4%]) in the vitamin D sufficient group.</p> <p>Vitamin D deficiency declined with increasing vitamin D dose (especially of vitamin D3). Vitamin D dose was not significantly associated with testing positive for COVID-19 (P=0.18).</p> | <p>The associations observed might not reflect causal effects of vitamin D deficiency on COVID-19. This is because vitamin D deficiency can reflect a range of chronic health conditions or behavioural factors which plausibly decrease the likelihood of treatment of vitamin D</p> |

|                                           |                                                                                  |                                                                                                                                                                                                                                                                                                                                                 |                                                                                                                                                                                                                                                                                                                                                                                                         |                                |                                                                                                                                                                                                                                                                                                                                                                                                                                                                                                                                                                                                                                                                                                                                                                                                                                                                                                                                                                                                                                                                                                                                                                                                                                                                                 |                                                                                                                                                                                                                                                                                                       |
|-------------------------------------------|----------------------------------------------------------------------------------|-------------------------------------------------------------------------------------------------------------------------------------------------------------------------------------------------------------------------------------------------------------------------------------------------------------------------------------------------|---------------------------------------------------------------------------------------------------------------------------------------------------------------------------------------------------------------------------------------------------------------------------------------------------------------------------------------------------------------------------------------------------------|--------------------------------|---------------------------------------------------------------------------------------------------------------------------------------------------------------------------------------------------------------------------------------------------------------------------------------------------------------------------------------------------------------------------------------------------------------------------------------------------------------------------------------------------------------------------------------------------------------------------------------------------------------------------------------------------------------------------------------------------------------------------------------------------------------------------------------------------------------------------------------------------------------------------------------------------------------------------------------------------------------------------------------------------------------------------------------------------------------------------------------------------------------------------------------------------------------------------------------------------------------------------------------------------------------------------------|-------------------------------------------------------------------------------------------------------------------------------------------------------------------------------------------------------------------------------------------------------------------------------------------------------|
|                                           |                                                                                  |                                                                                                                                                                                                                                                                                                                                                 | <p>2)Likely sufficient (last-level-not-deficient/treatment-not-decreased)<br/>3)Uncertain deficiency (last-level-deficient/treatment-increased or last-level-not-deficient/treatment-decreased)</p> <p>by age (&lt;50, ≥50), gender (Male/Female), race (White, other than White), ethnicity (Hispanic, not Hispanic), body mass index, employee status, comorbidity indicators (e.g. hypertension)</p> |                                |                                                                                                                                                                                                                                                                                                                                                                                                                                                                                                                                                                                                                                                                                                                                                                                                                                                                                                                                                                                                                                                                                                                                                                                                                                                                                 | deficiency and increase COVID-19 risk.                                                                                                                                                                                                                                                                |
| <p>Notari, A. and G. Torrieri (2020).</p> | <p>Correlational study</p> <p>126 countries, Only 50 countries for vitamin D</p> | <p>The number of cases follows in its early stages an almost exponential expansion. A starting point in each country was chosen: the first day di with 30 cases and fitted for 12 days. Thus, capturing the early exponential growth.</p> <p>Countries with too small total population (less than 300 thousands inhabitants) were excluded.</p> | <p>They analysed risk factors correlated with the initial transmission growth rate of COVID-19</p> <p>Average annual level of serum Vitamin D and the seasonal level</p> <p>The seasonal level is defined as: the amount during March or during winter for northern hemisphere, or during summer for southern hemisphere or the annual level for countries with little seasonal variation.</p>          | <p>Growth rate of COVID-19</p> | <p>They looked for linear correlations of the exponents with other variables, for a sample of 126 countries.</p> <p>They found a positive correlation, i.e. faster spread of COVID-19, with high confidence level with the following variables, with respective p-value: low Temperature (<math>4.10^{-7}</math>), high ratio of old vs. working-age people (<math>3.10^{-6}</math>), life expectancy (<math>8.10^{-6}</math>), number of international tourists (<math>1.10^{-5}</math>), earlier epidemic starting date di (<math>2.10^{-5}</math>), high level of physical contact in greeting habits (<math>6.10^{-5}</math>), lung cancer prevalence (<math>6.10^{-5}</math>), obesity in males (<math>1.10^{-4}</math>), share of population in urban areas (<math>2.10^{-4}</math>), cancer prevalence (<math>3.10^{-4}</math>), alcohol consumption (0.0019), daily smoking prevalence (0.0036), UV index (0.004, smaller sample, 73 countries), low Vitamin D serum levels (0.002-0.006, smaller sample, 50 countries). There is highly significant correlation also with blood type. Also, positive correlation with moderate CI (p-value of 0.02-0.03) with: CO2/SO emissions, type-1 diabetes in children, and low vaccination coverage for Tuberculosis (BCG).</p> | <p>The dataset for the annual vitamin D was built with the available literature, which is quite inhomogeneous.</p> <p>The dataset for the seasonal levels is more restricted. This is because the relative literature is less complete. So, for this the authors have included only 42 countries.</p> |

|                                     |                                                                           |                                                                                                                                                                                                                                                                                |                                                                                                                                                                                                                                                                                                                                                                                                                                                                 |                                                                                                   |                                                                                                                                                                                                                                                                                                                                                                                                                                                                                                                                                                                                                                                    |                                                                                                                                                                                                                                                                                                            |
|-------------------------------------|---------------------------------------------------------------------------|--------------------------------------------------------------------------------------------------------------------------------------------------------------------------------------------------------------------------------------------------------------------------------|-----------------------------------------------------------------------------------------------------------------------------------------------------------------------------------------------------------------------------------------------------------------------------------------------------------------------------------------------------------------------------------------------------------------------------------------------------------------|---------------------------------------------------------------------------------------------------|----------------------------------------------------------------------------------------------------------------------------------------------------------------------------------------------------------------------------------------------------------------------------------------------------------------------------------------------------------------------------------------------------------------------------------------------------------------------------------------------------------------------------------------------------------------------------------------------------------------------------------------------------|------------------------------------------------------------------------------------------------------------------------------------------------------------------------------------------------------------------------------------------------------------------------------------------------------------|
|                                     |                                                                           |                                                                                                                                                                                                                                                                                |                                                                                                                                                                                                                                                                                                                                                                                                                                                                 |                                                                                                   | Vitamin D is not highly correlated with UV index due to different food consumption in different countries.                                                                                                                                                                                                                                                                                                                                                                                                                                                                                                                                         |                                                                                                                                                                                                                                                                                                            |
| Raisi-Estabragh, Z., et al. (2020). | Retrospective cohort study<br><br>UK Biobank                              | 4,510 UK participants tested for COVID-19.<br><br>Latest data release (29/05/2020) includes test results from 16/03/2020 to 18/05/2020.<br><br>COVID-19 positive cases (n 1,326) Mean age 68.11 (SD 9.23)<br><br>COVID-19 negative controls (n 3,184) Mean age 68.91 (SD 8.72) | Serum 25(OH) D levels nmol/L<br><br>Multivariate logistic regression models by age, gender (Male/Female), ethnicity (Caucasian (any White background) and non-Caucasian: Black, Asian, Chinese) to test whether addition of: 1)cardio metabolic factors (e.g. hypertension, body mass index); 2) 25(OH)-vitamin D; 3) poor diet; 4) Townsend deprivation score; 5) housing; or 6)behavioural factors attenuated sex/ethnicity associations with COVID-19 status | COVID-19 test result<br><br>Greater risk of severe COVID-19                                       | Over-representation of men and non-White ethnicities in the COVID-19 positive group.<br><br>Non-Whites had, on average, poorer cardio metabolic profile, lower 25(OH)-vitamin D, greater material deprivation, and were more likely to live in larger households and flats.<br><br>Male sex, non-White ethnicity, higher body mass index, Townsend deprivation score, and household overcrowding were independently associated with significantly greater odds of COVID-19. The pattern of association was consistent for men and women; cardio metabolic, socio-demographic and behavioural factors did not attenuate sex/ethnicity associations. | UK Biobank baseline samples collected in 2006-2010.<br><br>Aggregating all Black and Minority Ethnic (BAME) populations into one cohort might overlook important differences between non-Caucasian ethnicities.<br><br>The current dataset does not allow assessment of specific COVID-19 health outcomes. |
| Tan, C. W., et al. (2020).          | Cohort observational study<br><br>A tertiary academic hospital, Singapore | All 43 consecutive hospitalized COVID-19 patients aged 50 and above.<br><br>Between 15 January and 15 April 2020.                                                                                                                                                              | DMB = a single daily oral dose of vitamin D3 1000 IU, magnesium 150mg and vitamin B12 500mcg for up to 14 days<br><br>Adjusted for age, gender and comorbidities                                                                                                                                                                                                                                                                                                | Deterioration post-DMB administration leading to any form of oxygen therapy and/or intensive care | Duration of therapy: days, Median 5 (IQR 4-7)<br><br>Significantly fewer DMB patients than controls required initiation of oxygen therapy subsequently throughout their hospitalization (17.6% vs 61.5%, P=0.006).<br><br>On univariate analysis, increasing age and presence of comorbidities were associated                                                                                                                                                                                                                                                                                                                                     | Small sample size, and the lack of systematic biologic measures to support their findings.                                                                                                                                                                                                                 |



|  |  |                                                                                                                                                |  |                                      |                                                                                                                                                                                                                                                                                                                                                                                                                 |  |
|--|--|------------------------------------------------------------------------------------------------------------------------------------------------|--|--------------------------------------|-----------------------------------------------------------------------------------------------------------------------------------------------------------------------------------------------------------------------------------------------------------------------------------------------------------------------------------------------------------------------------------------------------------------|--|
|  |  | <p>17 patients received Vitamin D, Magnesium, Vitamin B12 (DMB): Mean age 58.4 (SD 7.0)</p> <p>26 patients did not: Mean age 64.1 (SD 7.9)</p> |  | <p>support for COVID-19 patients</p> | <p>with significantly higher OR for oxygen therapy, while exposure to DMB therapy was associated with a significantly improved OR 0.13 (95% CI: 0.03 – 0.59, P=0.008) .</p> <p>On multivariate analysis, increasing age was associated with significantly higher OR for oxygen therapy, while exposure to DMB therapy was associated with a significantly improved OR 0.15 (95% CI: 0.025 – 0.93, P=0.041).</p> |  |
|--|--|------------------------------------------------------------------------------------------------------------------------------------------------|--|--------------------------------------|-----------------------------------------------------------------------------------------------------------------------------------------------------------------------------------------------------------------------------------------------------------------------------------------------------------------------------------------------------------------------------------------------------------------|--|

For peer review only

1  
2  
3  
4  
5  
6  
7  
8  
9  
10  
11  
12  
13  
14  
15  
16  
17  
18  
19  
20  
21  
22  
23  
24  
25  
26  
27  
28  
29  
30  
31  
32  
33  
34  
35  
36  
37  
38  
39  
40  
41  
42  
43  
44  
45  
46

## 5. Risk of bias of included studies

Risk of bias assessment using the Downs and Black Checklist<sup>61</sup>

| Study                              | Quality score                                                                                                                                                                 | Reviewer notes                                                                                                                                                                                                                                                                                                                                                                                                                                                                                                                                                                                                                                                                                                                                                                                                                                                                                                         |
|------------------------------------|-------------------------------------------------------------------------------------------------------------------------------------------------------------------------------|------------------------------------------------------------------------------------------------------------------------------------------------------------------------------------------------------------------------------------------------------------------------------------------------------------------------------------------------------------------------------------------------------------------------------------------------------------------------------------------------------------------------------------------------------------------------------------------------------------------------------------------------------------------------------------------------------------------------------------------------------------------------------------------------------------------------------------------------------------------------------------------------------------------------|
| Hastie et al., 2020 <sup>69</sup>  | 14/20<br><br>Seven domains were not applicable and therefore not assessed, 2 reporting, 1 external validity 3 internal validity (bias) and 1 internal validity (confounding). | <p>The study could not be scored for 3 questions as we were unable to determine; 1) the representativeness of the subjects who were prepared to participate from entire population from which they were recruited, 2) whether losses to follow-up were taken into account as patients lost to follow-up were not reported and 3) whether the study had sufficient power to detect a clinically important effect.</p> <p>The study did not score a point for 3 questions; 1) providing the number and a description of the characteristics of patients lost to follow-up, 2) stating whether study subjects in different intervention groups we recruited over the same period of time and 3) for assignment concealment as it was a non-randomised study. The study scored partially (only 1 point not two) for clearly described distributions of principal confounders in each group of subjects to be compared.</p> |
| D'Avolio et al, 2020 <sup>72</sup> | 13/15<br><br>Twelve domains were not applicable therefore not assessed, 3 reporting, 1 external validity, 4 internal validity (bias) and 4 internal validity (confounding).   | <p>The study could not be scored for the 'power' domain as we were unable to determine from the article whether the study had sufficient power to detect a clinically important effect where the probability value for a difference being due to chance is less than 5%.</p> <p>The study did not score 1 point in the 'external validity' domain as those subjects who were prepared to participate were not representative of the entire population from which they were recruited.</p>                                                                                                                                                                                                                                                                                                                                                                                                                              |
| Fasano et al., 2020 <sup>73</sup>  | 12/17<br><br>Ten domains were not applicable therefore not assessed, 3 reporting, 1 external validity, 4 internal validity (bias) and 2 internal validity (confounding).      | <p>The study could not be scored for 4 items, the 'power' domain and one question in the 'Internal validity - confounding (selection bias)' as the study did not specify the time period over which patients were recruited. It could also not be scored for 2 questions in the 'External validity domain', 1) the representativeness of the subjects asked to participate in the study compared to the entire population from which they were recruited and 2) the representativeness of those subjects who were prepared to participate compared to the entire population from which they were recruited.</p> <p>The study did not score 1 point as the effect of the main confounders was not investigated or confounding was demonstrated but no adjustment was made in the final analyses. The study scored two points for presentation of potential confounders.</p>                                             |

|                                                                                                                                                                                                                                                                                                                                                                                                                                                                     |                                                                                                                                                                                                   |                                                                                                                                                                                                                                                                                                                                                                                                                                                                                                                                                                                                                                                                                                                                                                                                                                                                                                                                                                                                                                                                                                                                                                                                                                                                                                                                                                                                                                                                                                                                                                                                                                                                                 |
|---------------------------------------------------------------------------------------------------------------------------------------------------------------------------------------------------------------------------------------------------------------------------------------------------------------------------------------------------------------------------------------------------------------------------------------------------------------------|---------------------------------------------------------------------------------------------------------------------------------------------------------------------------------------------------|---------------------------------------------------------------------------------------------------------------------------------------------------------------------------------------------------------------------------------------------------------------------------------------------------------------------------------------------------------------------------------------------------------------------------------------------------------------------------------------------------------------------------------------------------------------------------------------------------------------------------------------------------------------------------------------------------------------------------------------------------------------------------------------------------------------------------------------------------------------------------------------------------------------------------------------------------------------------------------------------------------------------------------------------------------------------------------------------------------------------------------------------------------------------------------------------------------------------------------------------------------------------------------------------------------------------------------------------------------------------------------------------------------------------------------------------------------------------------------------------------------------------------------------------------------------------------------------------------------------------------------------------------------------------------------|
| <p>1<br/>2<br/>3<br/>4<br/>5<br/>6<br/>7<br/>8<br/>9<br/>10<br/>11<br/>12<br/>13<br/>14<br/>15<br/>16<br/>17<br/>18<br/>19<br/>20<br/>21<br/>22<br/>23<br/>24<br/>25<br/>26<br/>27<br/>28<br/>29<br/>30<br/>31<br/>32<br/>33<br/>34<br/>35<br/>36<br/>37<br/>38<br/>39<br/>40<br/>41<br/>42<br/>43<br/>44<br/>45<br/>46<br/>47<br/>48<br/>49<br/>50<br/>51<br/>52<br/>53<br/>54<br/>55<br/>56<br/>57<br/>58<br/>59<br/>60</p> <p>Ilie et al., 2020<sup>70</sup></p> | <p>4/20</p> <p>Seven domains were not applicable and therefore not assessed, 1 reporting, 1 external validity, 3 internal validity (bias), 1 internal validity (confounding) and 1 for power.</p> | <p>The study could not be scored for 9 questions. Two in the 'reporting' domain, 1) interventions of interest not clearly described, 2) the main findings of the study are not clearly described. Two 'External validity' questions 1) the representativeness of the subjects asked to participate in the study compared to the entire population from which they were recruited and 2) the representativeness of those subjects who were prepared to participate compared to the entire population from which they were recruited. Two 'Internal validity – bias' domain questions 1) all analyses that had not been planned at the outset of the study were not clearly indicated (results of the study based on "data dredging", were not made clear), and 2) it was not clear is the statistical techniques used were appropriate to the data. Three 'Internal validity - confounding (selection bias)' domain questions, 1) no information provided concerning the source of patients included in the study 2) does not specify the time period over which patients were recruited, and 3) the numbers of patients lost to follow-up are not reported.</p> <p>The study did not score 7 points for the following; 3 reporting issues 1) no description of the characteristics of participants included in the study 2) no description of the distributions of principal confounders in each group of subjects to be compared, and 3) no description of the characteristics of patients lost to follow-up. Two internal validity bias issues 1) differences in follow-up were ignored and 2) no evidence that the main measure used were accurate (valid and reliable).</p> |
|---------------------------------------------------------------------------------------------------------------------------------------------------------------------------------------------------------------------------------------------------------------------------------------------------------------------------------------------------------------------------------------------------------------------------------------------------------------------|---------------------------------------------------------------------------------------------------------------------------------------------------------------------------------------------------|---------------------------------------------------------------------------------------------------------------------------------------------------------------------------------------------------------------------------------------------------------------------------------------------------------------------------------------------------------------------------------------------------------------------------------------------------------------------------------------------------------------------------------------------------------------------------------------------------------------------------------------------------------------------------------------------------------------------------------------------------------------------------------------------------------------------------------------------------------------------------------------------------------------------------------------------------------------------------------------------------------------------------------------------------------------------------------------------------------------------------------------------------------------------------------------------------------------------------------------------------------------------------------------------------------------------------------------------------------------------------------------------------------------------------------------------------------------------------------------------------------------------------------------------------------------------------------------------------------------------------------------------------------------------------------|

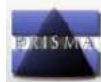

# PRISMA 2009 Checklist

| Section/topic                      | #  | Checklist item                                                                                                                                                                                                                                                                                              | Reported on page #    |
|------------------------------------|----|-------------------------------------------------------------------------------------------------------------------------------------------------------------------------------------------------------------------------------------------------------------------------------------------------------------|-----------------------|
| <b>TITLE</b>                       |    |                                                                                                                                                                                                                                                                                                             |                       |
| Title                              | 1  | Identify the report as a systematic review, meta-analysis, or both.                                                                                                                                                                                                                                         | 1                     |
| <b>ABSTRACT</b>                    |    |                                                                                                                                                                                                                                                                                                             |                       |
| Structured summary                 | 2  | Provide a structured summary including, as applicable: background; objectives; data sources; study eligibility criteria, participants, and interventions; study appraisal and synthesis methods; results; limitations; conclusions and implications of key findings; systematic review registration number. | 3                     |
| <b>INTRODUCTION</b>                |    |                                                                                                                                                                                                                                                                                                             |                       |
| Rationale                          | 3  | Describe the rationale for the review in the context of what is already known.                                                                                                                                                                                                                              | 5                     |
| Objectives                         | 4  | Provide an explicit statement of questions being addressed with reference to participants, interventions, comparisons, outcomes, and study design (PICOS).                                                                                                                                                  | 6                     |
| <b>METHODS</b>                     |    |                                                                                                                                                                                                                                                                                                             |                       |
| Protocol and registration          | 5  | Indicate if a review protocol exists, if and where it can be accessed (e.g., Web address), and, if available, provide registration information including registration number.                                                                                                                               | 6                     |
| Eligibility criteria               | 6  | Specify study characteristics (e.g., PICOS, length of follow-up) and report characteristics (e.g., years considered, language, publication status) used as criteria for eligibility, giving rationale.                                                                                                      | 7                     |
| Information sources                | 7  | Describe all information sources (e.g., databases with dates of coverage, contact with study authors to identify additional studies) in the search and date last searched.                                                                                                                                  | 6                     |
| Search                             | 8  | Present full electronic search strategy for at least one database, including any limits used, such that it could be repeated.                                                                                                                                                                               | Supp appendix 1       |
| Study selection                    | 9  | State the process for selecting studies (i.e., screening, eligibility, included in systematic review, and, if applicable, included in the meta-analysis).                                                                                                                                                   | 7 and supp appendix 2 |
| Data collection process            | 10 | Describe method of data extraction from reports (e.g., piloted forms, independently, in duplicate) and any processes for obtaining and confirming data from investigators.                                                                                                                                  | 8                     |
| Data items                         | 11 | List and define all variables for which data were sought (e.g., PICOS, funding sources) and any assumptions and simplifications made.                                                                                                                                                                       | 8                     |
| Risk of bias in individual studies | 12 | Describe methods used for assessing risk of bias of individual studies (including specification of whether this was done at the study or outcome level), and how this information is to be used in any data synthesis.                                                                                      | 8                     |



# PRISMA 2009 Checklist

|                      |    |                                                                                                                                                           |   |
|----------------------|----|-----------------------------------------------------------------------------------------------------------------------------------------------------------|---|
| Summary measures     | 13 | State the principal summary measures (e.g., risk ratio, difference in means).                                                                             | 8 |
| Synthesis of results | 14 | Describe the methods of handling data and combining results of studies, if done, including measures of consistency (e.g., $I^2$ ) for each meta-analysis. | 8 |

Page 1 of 2

| Section/topic                 | #  | Checklist item                                                                                                                                                                                           | Reported on page #                  |
|-------------------------------|----|----------------------------------------------------------------------------------------------------------------------------------------------------------------------------------------------------------|-------------------------------------|
| Risk of bias across studies   | 15 | Specify any assessment of risk of bias that may affect the cumulative evidence (e.g., publication bias, selective reporting within studies).                                                             | n/a                                 |
| Additional analyses           | 16 | Describe methods of additional analyses (e.g., sensitivity or subgroup analyses, meta-regression), if done, indicating which were pre-specified.                                                         | 8                                   |
| <b>RESULTS</b>                |    |                                                                                                                                                                                                          |                                     |
| Study selection               | 17 | Give numbers of studies screened, assessed for eligibility, and included in the review, with reasons for exclusions at each stage, ideally with a flow diagram.                                          | 8                                   |
| Study characteristics         | 18 | For each study, present characteristics for which data were extracted (e.g., study size, PICOS, follow-up period) and provide the citations.                                                             | 8 and<br>supp<br>appendix<br>3      |
| Risk of bias within studies   | 19 | Present data on risk of bias of each study and, if available, any outcome level assessment (see item 12).                                                                                                | 8/9 supp<br>appendix<br>4           |
| Results of individual studies | 20 | For all outcomes considered (benefits or harms), present, for each study: (a) simple summary data for each intervention group (b) effect estimates and confidence intervals, ideally with a forest plot. | 8/9/10<br>and supp<br>appendix<br>3 |
| Synthesis of results          | 21 | Present results of each meta-analysis done, including confidence intervals and measures of consistency.                                                                                                  | n/a                                 |
| Risk of bias across studies   | 22 | Present results of any assessment of risk of bias across studies (see Item 15).                                                                                                                          | n/a                                 |
| Additional analysis           | 23 | Give results of additional analyses, if done (e.g., sensitivity or subgroup analyses, meta-regression [see Item 16]).                                                                                    | 10                                  |
| <b>DISCUSSION</b>             |    |                                                                                                                                                                                                          |                                     |
| Summary of evidence           | 24 | Summarize the main findings including the strength of evidence for each main outcome; consider their relevance to key groups (e.g., healthcare providers, users, and policy makers).                     | 11/12/13                            |
| Limitations                   | 25 | Discuss limitations at study and outcome level (e.g., risk of bias), and at review-level (e.g., incomplete retrieval of identified research, reporting bias).                                            | 13                                  |

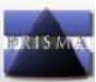

# PRISMA 2009 Checklist

1  
2  
3  
4  
5  
6  
7  
8  
9  
10  
11  
12  
13  
14  
15  
16  
17  
18  
19  
20  
21  
22  
23  
24  
25  
26  
27  
28  
29  
30  
31  
32  
33  
34  
35  
36  
37  
38  
39  
40  
41  
42  
43  
44  
45  
46  
47

|                |    |                                                                                                                                            |       |
|----------------|----|--------------------------------------------------------------------------------------------------------------------------------------------|-------|
| Conclusions    | 26 | Provide a general interpretation of the results in the context of other evidence, and implications for future research.                    | 13/14 |
| <b>FUNDING</b> |    |                                                                                                                                            |       |
| Funding        | 27 | Describe sources of funding for the systematic review and other support (e.g., supply of data); role of funders for the systematic review. | 15    |

From: Moher D, Liberati A, Tetzlaff J, Altman DG, The PRISMA Group (2009). Preferred Reporting Items for Systematic Reviews and Meta-Analyses: The PRISMA Statement. PLoS Med 6(7): e1000097. doi:10.1371/journal.pmed1000097

For more information, visit: [www.prisma-statement.org](http://www.prisma-statement.org).

For peer review only

# BMJ Open

## Association between vitamin D supplementation or level and susceptibility to COVID-19 infection including clinical course, morbidity and mortality outcomes? A systematic review.

|                                 |                                                                                                                                                                                                                                                                                                                                                                                                                                                                                                                                                                                                                                                                                                                                                                                                                                                                                                                                                                                        |
|---------------------------------|----------------------------------------------------------------------------------------------------------------------------------------------------------------------------------------------------------------------------------------------------------------------------------------------------------------------------------------------------------------------------------------------------------------------------------------------------------------------------------------------------------------------------------------------------------------------------------------------------------------------------------------------------------------------------------------------------------------------------------------------------------------------------------------------------------------------------------------------------------------------------------------------------------------------------------------------------------------------------------------|
| Journal:                        | <i>BMJ Open</i>                                                                                                                                                                                                                                                                                                                                                                                                                                                                                                                                                                                                                                                                                                                                                                                                                                                                                                                                                                        |
| Manuscript ID                   | bmjopen-2020-043737.R1                                                                                                                                                                                                                                                                                                                                                                                                                                                                                                                                                                                                                                                                                                                                                                                                                                                                                                                                                                 |
| Article Type:                   | Original research                                                                                                                                                                                                                                                                                                                                                                                                                                                                                                                                                                                                                                                                                                                                                                                                                                                                                                                                                                      |
| Date Submitted by the Author:   | 30-Oct-2020                                                                                                                                                                                                                                                                                                                                                                                                                                                                                                                                                                                                                                                                                                                                                                                                                                                                                                                                                                            |
| Complete List of Authors:       | Grove, Amy; Warwick Life Sciences, Division of Health Sciences, Warwick Medical School<br>Osokogu, Osemeke; University of Warwick, Warwick Medical School<br>Al-Khudairy, Lena; University of Warwick Warwick Medical School, Population, evidence and technology<br>Mehrabian, Amin; University of Warwick, Warwick Medical School; University of Medical Sciences, 2) Department of Pharmaceutical Nanotechnology<br>Zanganeh, Mandana; University of Warwick, Warwick Medical School<br>Brown, Anna; University of Warwick, Warwick Medical School<br>Court, Rachel; University of Warwick, Health Sciences<br>Taylor-Phillips, Sian; University of Warwick, Warwick Medical School<br>Uthman, Olalekan; University of Warwick, Warwick-Centre for Applied Health Research (WCAHRD)<br>McCarthy, Noel; University of Warwick, Warwick Medical School<br>Kumar, Sudhesh; University of Warwick, Medical School<br>Clarke, Aileen; University of Warwick, Division of Health Sciences |
| <b>Primary Subject Heading</b>: | Public health                                                                                                                                                                                                                                                                                                                                                                                                                                                                                                                                                                                                                                                                                                                                                                                                                                                                                                                                                                          |
| Secondary Subject Heading:      | Infectious diseases                                                                                                                                                                                                                                                                                                                                                                                                                                                                                                                                                                                                                                                                                                                                                                                                                                                                                                                                                                    |
| Keywords:                       | COVID-19, Public health < INFECTIOUS DISEASES, NUTRITION & DIETETICS                                                                                                                                                                                                                                                                                                                                                                                                                                                                                                                                                                                                                                                                                                                                                                                                                                                                                                                   |
|                                 |                                                                                                                                                                                                                                                                                                                                                                                                                                                                                                                                                                                                                                                                                                                                                                                                                                                                                                                                                                                        |

SCHOLARONE™  
Manuscripts



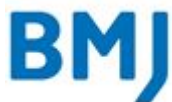

I, the Submitting Author has the right to grant and does grant on behalf of all authors of the Work (as defined in the below author licence), an exclusive licence and/or a non-exclusive licence for contributions from authors who are: i) UK Crown employees; ii) where BMJ has agreed a CC-BY licence shall apply, and/or iii) in accordance with the terms applicable for US Federal Government officers or employees acting as part of their official duties; on a worldwide, perpetual, irrevocable, royalty-free basis to BMJ Publishing Group Ltd ("BMJ") its licensees and where the relevant Journal is co-owned by BMJ to the co-owners of the Journal, to publish the Work in this journal and any other BMJ products and to exploit all rights, as set out in our [licence](#).

The Submitting Author accepts and understands that any supply made under these terms is made by BMJ to the Submitting Author unless you are acting as an employee on behalf of your employer or a postgraduate student of an affiliated institution which is paying any applicable article publishing charge ("APC") for Open Access articles. Where the Submitting Author wishes to make the Work available on an Open Access basis (and intends to pay the relevant APC), the terms of reuse of such Open Access shall be governed by a Creative Commons licence – details of these licences and which [Creative Commons](#) licence will apply to this Work are set out in our licence referred to above.

Other than as permitted in any relevant BMJ Author's Self Archiving Policies, I confirm this Work has not been accepted for publication elsewhere, is not being considered for publication elsewhere and does not duplicate material already published. I confirm all authors consent to publication of this Work and authorise the granting of this licence.

1  
2  
3 Title page  
4  
5

6 **Title**  
7

8  
9 Association between vitamin D supplementation or level and susceptibility to COVID-19  
10 infection including clinical course, morbidity and mortality outcomes? A systematic review.  
11  
12

13 **Author's names**  
14

15  
16 Amy Grove (0000-0002-8027-7274), Osemeke Osokogu, Lena Al-Khudairy, Amin Mehrabian,  
17 Mandana Zanganeh, Anna Brown, Rachel Court, Sian Taylor-Phillips, Olalekan Uthman, Noel  
18 McCarthy, Sudhesh Kumar, Aileen Clarke (0000-0001-8299-3146).<sup>1</sup>  
19  
20

21 **Address for each author**  
22

23 **Author's names and positions**  
24

25  
26 1) Warwick Medical School, University of Warwick, Coventry, CV4 7AL, UK  
27

28 Dr Amy Grove

29 Associate Professor of Health Technology Assessment and Implementation Science  
30  
31

32 Dr Osemeke Osokogu

33 Research Fellow  
34  
35

36 Dr Lena Al-Khudairy

37 Senior Research Fellow  
38  
39

40 Dr Mandana Zanganeh

41 Research Fellow  
42  
43

44 Mrs Anna Brown

45 Information Specialist  
46  
47

48 Mrs Rachel Court

49 Information Specialist  
50  
51

52 Professor Sian Taylor-Phillips

53 Professor of Population Health  
54  
55

56 Professor Olalekan Uthman

57 Professor of Evidence Synthesis  
58  
59  
60

1  
2  
3 Professor Noel McCarthy  
4 Professor of Public Health  
5

6  
7 Professor Sudhesh Kumar  
8 Dean of Medicine  
9

10  
11 Professor Aileen Clarke  
12 Professor of Public Health and Health Services Research  
13  
14

15  
16 2) Department of Pharmaceutical Nanotechnology, School of Pharmacy, Mashhad  
17 University of Medical Sciences, Mashhad, Iran  
18

19  
20 Mr Amin Mehrabian  
21 Research Fellow  
22

23  
24 **Corresponding Author**  
25

26  
27 Dr Amy Grove, Room A101, Division of Health Sciences, Warwick Medical School, University  
28 of Warwick, Coventry, CV4 7AL  
29 Email: A.L.Grove@warwick.ac.uk  
30  
31  
32  
33  
34  
35  
36  
37  
38  
39  
40  
41  
42  
43  
44  
45  
46  
47  
48  
49  
50  
51  
52  
53  
54  
55  
56  
57  
58  
59  
60

## Abstract

Objective: To systemically review and critically appraise published studies of the association between vitamin D supplementation or level and susceptibility to COVID-19 infection, including clinical course, morbidity and mortality outcomes.

Design: Systematic review.

Data sources: MEDLINE (OVID), Embase (OVID), Cochrane Central Register of Controlled Trials, MedRxiv and BioRxiv preprint databases. COVID-19 databases of the WHO, Cochrane, CEBM Oxford, and Bern University up to 10 June 2020.

Study selection: Studies which assessed Vitamin D supplementation and/or Low Serum Vitamin D in patients acutely ill with, or at risk of severe betacoronavirus infection (SARS-CoV, MERS-CoV, SARS-CoV-2).

Data extraction: Two authors independently extracted data using a predefined data extraction form and assessed risk of bias using the Downs and Black Quality Assessment Checklist.

Results: Searches elicited 449 papers, 59 studies were eligible full text assessment and four met the eligibility criteria of this review. The four studies were narratively synthesised and included: 1) a cross-sectional study (n=107) suggesting an inverse association between serum vitamin D and SARS-CoV-2, 2) a retrospective cohort study (348,598 participants, 449 cases) in which univariable analysis showed that vitamin D protects against COVID-19, 3) an ecological country level study demonstrating a negative correlation between vitamin D and COVID-19 case numbers and mortality, and 4) a case-control survey (n=1,486) showing cases with confirmed/probable COVID-19 reported lower vitamin D supplementation. All studies were at high/unclear risk of bias.

Conclusion: There is no robust evidence of a negative association between vitamin D and COVID-19 infection. No relevant randomised control trials were identified and there is no robust peer reviewed published evidence of association between Vitamin D levels and severity of symptoms or mortality due to COVID-19. Guideline producers should acknowledge that benefits of vitamin D supplementation in COVID-19 infection are as yet unproven despite increasing interest from the media and academic community.

### Strengths and limitations of this study

- The strengths of this systematic review include that it is reported in accordance with the Preferred Reporting Items for Systematic Reviews and Meta-Analyses (PRISMA) checklist.
- The review was conducted by two independent reviewers to ensure robustness of this work.
- We searched multiple living systematic review databases to enable us to capture publications in a fast moving field of research.
- To increase transparency we have provided the details of our full search strategy in the supplement information.
- The limitations of the study relate to the small amount of evidence available which was, at risk of bias and which limits the inferences that can be drawn.
- The review was restricted to the English language, therefore non English language papers may have been missed.

## Introduction

COVID-19, a novel viral infection caused by Severe Acute Respiratory Syndrome Coronavirus two (SARS-CoV-2) was declared a pandemic by The World Health Organization (WHO) on 11 March 2020.<sup>1</sup> Mild COVID-19 infection may manifest as high temperature, a continuous cough and a loss of or change in sense of smell or taste.<sup>2,3</sup> However, more severe and critical cases can result in inflammation of the lungs, low oxygen levels and acute respiratory distress syndrome.<sup>4</sup> Interest is mounting regarding the association of vitamin D supplementation or level with susceptibility to COVID-19 infection due to the recognised modulating effects of vitamin D on the immune system and immune response.

Vitamin D can modulate the immune system through highly expressed receptors in most non-skeletal tissues.<sup>5,6</sup> Two of the most common analogues of vitamin D which are found in food and used as a dietary supplement are D<sub>2</sub> (ergocalciferol) and D<sub>3</sub> (cholecalciferol, also made by the skin when exposed to sunlight).<sup>7</sup> Both D<sub>2</sub> and D<sub>3</sub> can be hydroxylated by liver enzymes CYP2R1 and CYP27A1 to form calcidiol (25(OH)D). The active metabolite of vitamin D, calcitriol (1 $\alpha$ ,25(OH)<sub>2</sub>D), results from the action of CYP27B enzyme on calcidiol. CYP27B is found in several tissues including the kidney, skin, bones, and immune system.<sup>8,9</sup> Tumour necrosis factor  $\alpha$  (TNF  $\alpha$ ) and interferon (IFN $\gamma$ ) are examples of inflammatory cytokines that stimulate the CYP27B enzymes of the immune system.<sup>10-20</sup> Vitamin D can interact with both the innate and cellular immune systems through these mechanisms.

Current Public Health England (PHE),<sup>21</sup> National Institutes of Health<sup>22</sup> and European Food Safety Authority<sup>23</sup> recommendations highlight the importance of vitamin D to population health. Vitamin D deficiency is defined as less than 25 nmol/L (10ng/ml) measured in blood serum.<sup>21</sup> UK guideline recommendations suggest that people take a supplement of 10 micrograms of vitamin D per day during the winter months or throughout the year if they do not spend time outdoors or if they cover the majority of their skin when outside.<sup>21</sup> Published editorials, journal commentaries<sup>24-29</sup> and news media reports<sup>30-32</sup> suggest that individuals with low blood serum concentrations of vitamin D might be at higher risk of infection with COVID-19, or upon infection have worse outcomes than individuals with normal/high serum vitamin D.<sup>33</sup>

Several observational studies have reported associations between low serum vitamin D and chronic<sup>34</sup> and acute conditions such as susceptibility to acute respiratory tract infections (RTI).<sup>35-37</sup> Most recently, Martineau and colleagues (2017) conducted a systematic review and meta-analysis of individual participant data from randomised controlled trials (RCTs) to assess the overall effect of vitamin D supplementation on risk of acute RTI.<sup>38</sup> They reported vitamin D supplementation to be safe while protecting against acute RTI overall (adjusted odds ratio 0.88, 95% confidence interval 0.81 to 0.96; P for heterogeneity <0.001). Patients very deficient in vitamin D benefited the most (adjusted odds ratio 0.75, 0.60 to 0.95; p for

1  
2  
3 interaction=0.006).<sup>38</sup> Critiques of this review have suggested that the findings should be  
4 interpreted as hypothesis generating only, as the results are heterogeneous and not  
5 sufficiently applicable to the general population.<sup>39</sup> Recent rapid reviews of vitamin D for  
6 treatment or prevention in COVID-19 reported no evidence that vitamin D deficiency  
7 predisposes to COVID-19, or that vitamin D supplementation is effective in prevention or  
8 treatment of COVID-19.<sup>40 41</sup> However, data sources included in the rapid review were  
9 limited.<sup>42</sup> Given the remaining uncertainty, it is timely to systematically review and critically  
10 appraise all peer reviewed published evidence to assess the association of vitamin D  
11 supplementation or level with susceptibility to COVID-19 infection including clinical course,  
12 morbidity and mortality outcomes.  
13  
14  
15  
16  
17  
18

## 19 **Methods**

### 20 Protocol registration

21  
22 The methods were prespecified in a protocol that was registered with the PROSPERO  
23 International Prospective Register of Systematic Reviews  
24 ([https://www.crd.york.ac.uk/prospero/display\\_record.php?ID=CRD42020182876](https://www.crd.york.ac.uk/prospero/display_record.php?ID=CRD42020182876)). Research  
25 ethics committee approval was not required for this study.  
26  
27  
28  
29

30 We undertook a systematic review to answer the following question: Is vitamin D  
31 supplementation or level associated with susceptibility to severe betacoronavirus infection  
32 (Severe Acute Respiratory Syndrome [SARS-CoV], Middle East Respiratory Syndrome  
33 [MERS-CoV], Severe Acute Respiratory Syndrome two [SARS-CoV-2]) including clinical course,  
34 morbidity and mortality outcomes?  
35  
36  
37

38 Our review was conceptualised and written in accordance with the PRISMA statement.<sup>43</sup>  
39  
40

### 41 Data sources and search

42 The search strategy was developed by the information specialists in collaboration with the  
43 research team and clinical advisors. We searched MEDLINE (OVID interface), Embase (OVID  
44 interface), Cochrane Central Register of Controlled Trials, MedRxiv and BioRxiv preprint  
45 databases on 6<sup>th</sup>-8<sup>th</sup> May 2020. We searched the global research on COVID-19 developed by  
46 the WHO,<sup>44</sup> CEBM Oxford,<sup>45</sup> and the living systematic review developed by Bern University<sup>46</sup>  
47 on 10 May 2020. We updated the database searches on 10<sup>th</sup> June 2020 to capture articles  
48 which may have been published since the initial search was conducted.  
49  
50  
51  
52

53 We searched additional resources including relevant systematic reviews (in MEDLINE [OVID  
54 interface], Embase [OVID interface] and Cochrane Database of Systematic Reviews, 19<sup>th</sup> May  
55 2020), relevant references and contacted experts for additional evidence. Our full search  
56 record is included in the supplementary information.  
57  
58  
59  
60



## Study eligibility

We developed pre-defined study eligibility criteria aligned to the research question (Table 1). We imposed a date restriction of January 2002, to capture all published articles since SARS-CoV was first discovered in Asia in February 2003.<sup>47</sup> We limited to English language only.

Table 1. Study eligibility criteria

| <i>Study eligibility criteria</i>                                                                                                                                                                                                                                                                                                                                                                                         |
|---------------------------------------------------------------------------------------------------------------------------------------------------------------------------------------------------------------------------------------------------------------------------------------------------------------------------------------------------------------------------------------------------------------------------|
| <p>P - Population</p> <ol style="list-style-type: none"> <li>1) Patients acutely ill with betacoronavirus infection [SARS-CoV, MERS-CoV, SARS-CoV-2]</li> <li>2) or at risk of acute illness with betacoronavirus infection</li> </ol>                                                                                                                                                                                    |
| <p>I - Intervention/exposure</p> <ol style="list-style-type: none"> <li>1) Vitamin D supplementation</li> <li>2) Low Serum vitamin D</li> </ol>                                                                                                                                                                                                                                                                           |
| <p>O - Outcomes</p> <ol style="list-style-type: none"> <li>1) Betacoronavirus infection (to include serological evidence of infection or clinically confirmed symptomatic infection);</li> <li>2) Severe betacoronavirus infection (to include patients admitted to hospital or admitted to intensive care); mortality due to betacoronavirus infection</li> <li>3) Mortality due to betacoronavirus infection</li> </ol> |
| <p>C – Comparators</p> <ol style="list-style-type: none"> <li>1) No vitamin D supplementation</li> <li>2) High or normal serum vitamin D</li> </ol>                                                                                                                                                                                                                                                                       |
| <p>S - Study design</p> <p>Peer reviewed publications of randomised controlled trials and non-randomised studies were eligible for inclusion; including, non randomised controlled trials, interrupted time series analyses, controlled before-and-after studies, cohort studies, ecological studies, case reports and case series.</p>                                                                                   |
| <p>Subgroups</p> <ol style="list-style-type: none"> <li>1. Ethnicity characteristics (White British, all other White, Mixed, Asian, Black, Other)</li> <li>2. Age characteristics (population by five-year age groups)</li> </ol>                                                                                                                                                                                         |

## Article selection

Following the article search, we systematically identified and removed any duplicate citations using EndNote X9 software. Using titles and abstracts, de-duplicated citations were screened by two independent reviewers (OO, MZ, AM, AG) and checked by a third (AC). All articles deemed ineligible were excluded at this stage. We identified and obtained all remaining articles for full text screening, which was performed independently by at least two reviewers against the pre-specified eligibility criteria (Table 1). Where disagreements regarding the inclusion of articles arose, a third reviewer (AC) was consulted to reach a final decision.

### Data extraction

Two reviewers independently (LAK, MZ, OO, AM) extracted data from eligible full-text papers using a prespecified data extraction form. The accuracy of all the data extraction was independently assessed by a third reviewer (AG). Where reported, we sought to extract data from each article relevant to the research question, including details of population, intervention/exposure, comparator, outcomes and any detail related to the two pre-specified subgroups: ethnicity characteristics and age characteristics. Disagreements between reviewers were resolved by discussion and agreement, or via consultation with a third reviewer (AC).

### Risk of bias

The included studies had observational study designs aimed at answering a specific question. Therefore, risk of bias of included full-text papers was assessed using the Downs and Black Quality Assessment Checklist.<sup>48</sup> Two reviewers (AM, MZ, OO) independently assessed the risk of bias of the included studies and the accuracy of the assessment was evaluated by a third reviewer (LAK).

### Data analysis

We anticipated that identified studies would be too heterogeneous to facilitate pooling of study data and planned a narrative synthesis. Nevertheless, we intended to consider pooling outcomes data in a meta-analysis using a random-effects model if appropriate.

### Patient and public involvement

Due to the rapid timeframe of this systematic review it was not possible for our research team to involve patients or the public in the design, conduct, or reporting of our study.

### Results

After searching databases, assessing the reference lists of 17 narrative reviews<sup>27 28 33 49-62</sup> and one additional article identified through consultation with clinical experts,<sup>38</sup> we identified 499 citations. Following removal of duplicates and screening of titles and abstracts, we retrieved 59 full-text papers of which four met the full eligibility criteria (see **Error! Reference source not found.**). The electronic supplement includes a list of reasons for excluding studies at full text review. Seven articles closely met the eligibility criteria but were excluded as they were not available as peer reviewed publications at the time of our narrative synthesis, details of these seven studies<sup>63-69</sup> is provided in the electronic supplement.

<Figure 1 approximatley here >

1  
2  
3  
4 The characteristics of the four included studies are presented in  
5  
6  
7  
8  
9  
10  
11  
12  
13  
14  
15  
16  
17  
18  
19  
20  
21  
22  
23  
24  
25  
26  
27  
28  
29  
30  
31  
32  
33  
34  
35  
36  
37  
38  
39  
40  
41  
42  
43  
44  
45  
46  
47  
48  
49  
50  
51  
52  
53  
54  
55  
56  
57  
58  
59  
60

For peer review only

1  
2  
3 Table 2. All four included studies were conducted in Europe and published in April or May  
4 2020. One study was based on data from UK residents exclusively,<sup>70</sup> another included data  
5 on residents in 20 European countries, including the UK.<sup>71</sup> The studies were observational  
6 design and no relevant RCT were identified or included in the review. All four studies were  
7 at high or unclear risk of bias and scored poorly across several domains of the Downs and  
8 Black Quality Assessment Checklist,<sup>48</sup> including external validity, internal validity and power.  
9 A prominent issue amongst the included studies was that the authors did not perform  
10 adequate multivariable adjustment to correct for confounding.<sup>72 73 74</sup> Ecological bias was  
11 present in Ilie et al., 2020<sup>71</sup> which may result from spatial and temporal scale differences  
12 between country level mean levels of vitamin D. However, several domains in each risk of  
13 bias assessment were not applicable or not reported and therefore, could not be scored  
14 using the Downs and Black Quality Assessment Checklist.<sup>48</sup> Detailed risk of bias scores are  
15 provided in the electronic supplement.  
16  
17  
18  
19  
20  
21  
22  
23  
24  
25  
26  
27  
28  
29  
30  
31  
32  
33  
34  
35  
36  
37  
38  
39  
40  
41  
42  
43  
44  
45  
46  
47  
48  
49  
50  
51  
52  
53  
54  
55  
56  
57  
58  
59  
60

Table 2. Characteristics of the four included studies

| Study                              | Design/Setting                                                                        | Population                                                   | Exposure/Intervention                                                                                                                                                      | Outcomes                                                         | Results                                                                                                                                                                                                                                                                                                                                                        | Limitations                                                                                                                                                                                                                                           |
|------------------------------------|---------------------------------------------------------------------------------------|--------------------------------------------------------------|----------------------------------------------------------------------------------------------------------------------------------------------------------------------------|------------------------------------------------------------------|----------------------------------------------------------------------------------------------------------------------------------------------------------------------------------------------------------------------------------------------------------------------------------------------------------------------------------------------------------------|-------------------------------------------------------------------------------------------------------------------------------------------------------------------------------------------------------------------------------------------------------|
| <b>Serum vitamin D</b>             |                                                                                       |                                                              |                                                                                                                                                                            |                                                                  |                                                                                                                                                                                                                                                                                                                                                                |                                                                                                                                                                                                                                                       |
| D'Avolio et al. 2020 <sup>73</sup> | Cross-sectional study<br>Canton of Tessin, Switzerland                                | 107 patients with data on SARS-CoV-2 and 25(OH)D measurement | Vitamin D analysis, conducted within seven weeks of the SARS-CoV-2 polymerase chain reaction (PCR) result<br><br>Control patients with 25(OH)D data during the same period | SARS-CoV-2 infection                                             | Group 1 comprised 27 patients with positive PCR test results for SARS-CoV-2 while group 2 comprised 80 patients with a negative PCR result for SARS-CoV-2<br><br>Significantly lower 25(OH)D levels (p = 0.004) in SARS-CoV-2 patients even after stratifying patients according to age >70 years                                                              | Few patients from a single hospital<br><br>No available clinical information about the severity of COVID-19 symptoms<br><br>No data on other potential confounding variable<br><br>SARS-CoV-2 and the 25(OH)D status were performed on different days |
| Hastie et al. 2020 <sup>70</sup>   | Retrospective cohort study<br>UK Biobank Cohort including England, Scotland and Wales | 502,624 participants aged 37-73 years between 2006 and 2010  | Biochemical assay of 25(OH)D, a measure of vitamin D status<br><br>Vitamin D was imputed if it was below or above the limit of detection                                   | Confirmed COVID-19 infection (at least one positive test result) | Complete data on 348,598 UK Biobank participants<br><br>449 had confirmed COVID-19 infection. Of these, 385 (85.8%) were White compared to 64 (14.2%) non-White (Black, South Asian and others)<br><br>Vitamin D was associated with COVID-19 infection univariably but not after adjustment for confounders. Ethnicity was associated with COVID-19 infection | UK Biobank is not representative of the general population<br><br>Baseline measurements, including 25(OH)D concentration and health status, were obtained a decade prior to conduct of the study                                                      |

1  
2  
3  
4  
5  
6  
7  
8  
9  
10  
11  
12  
13  
14  
15  
16  
17  
18  
19  
20  
21  
22  
23  
24  
25  
26  
27  
28  
29  
30  
31  
32  
33  
34  
35  
36  
37  
38  
39  
40  
41  
42  
43  
44  
45  
46

|                                  |                                                                        |                                                                                                            |                                          |                                                                                                                 |                                                                                                                                                           |                                                                                                                                                                                                                                                                             |
|----------------------------------|------------------------------------------------------------------------|------------------------------------------------------------------------------------------------------------|------------------------------------------|-----------------------------------------------------------------------------------------------------------------|-----------------------------------------------------------------------------------------------------------------------------------------------------------|-----------------------------------------------------------------------------------------------------------------------------------------------------------------------------------------------------------------------------------------------------------------------------|
| Ilie et al. 2020 <sup>71</sup>   | Ecological study<br>20 European countries                              | Population of 20 included European countries                                                               | Mean levels of vitamin D in each country | Cases of COVID-19 per 1 million population in each country<br><br>Deaths from COVID-19 per 1 million population | Negative correlations between mean levels of vitamin D and the number of COVID-19 cases per 1 million, and mortality per 1 million                        | The number of cases per country is affected by the number of tests performed and by the different measures taken by each country to prevent the spread of infection                                                                                                         |
| <b>Vitamin D supplementation</b> |                                                                        |                                                                                                            |                                          |                                                                                                                 |                                                                                                                                                           |                                                                                                                                                                                                                                                                             |
| Fasano et al. 2020 <sup>74</sup> | Case-control survey<br><br>A single tertiary centre in Lombardy, Italy | 1,486 Parkinson's disease (PD) patients were included in the survey<br><br>1,207 family members (controls) | Vitamin D                                | 'Confirmed' or 'probable' diagnosis of COVID-19                                                                 | 12.4% of PD patients with confirmed or probable COVID-19 had been taking vitamin D<br><br>22.9% of PD patients without COVID-19 had been taking vitamin D | Well-known limitation of a telephone survey<br><br>Community-dwelling PD patients<br><br>Some patients could not be reached possibly due to death from COVID-19<br><br>COVID-19 diagnosis could not be confirmed in many cases<br><br>Younger age of non- PD COVID-19 cases |

### Serum vitamin D

D'Avolio et al., 2020<sup>73</sup> used a cross sectional design with data on nasopharyngeal swab polymerase chain reaction (PCR) analysis for SARS-CoV-2 and a 25(OH)D measurement taken from patients between 1st March and 14th April 2020. PCR positives (median age = 74 years [IQR 65–81]; male = 70.4%) had significantly ( $P= 0.004$ ) lower serum 25(OH)D levels (median = 11.1 ng/mL [IQR 8.2–21.0]) than PCR negatives (median age = 73 years [IQR 61–82]; male = 48.8%; median 25(OH)D = 24.6 ng/mL [IQR 8.9–30.5]). Although gender and age stratified analysis showed no significant differences, older (>70 years) SARS-CoV-2 positive ( $n=18$ ) participants had significantly lower median serum 25 (OH) D levels (9.3 ng/mL [IQR 8.1–19.9]) than older SARS-CoV-2 negatives ( $n=43$ ) (23.1 ng/mL [IQR 8.5–31.7]) ( $P = 0.037$ ).

Hastie et al., 2020<sup>70</sup> is a retrospective cohort study that utilised data from the UK Biobank, <sup>72</sup> using data from 348,598 people with complete information on vitamin D and covariates; 449 people tested positive for COVID-19 infection. COVID-19 positives were older (Median = 49 years; Interquartile Range [IQR] = 40-58) than COVID-19 negatives (Median = 49 years; IQR = 38 - 57) with  $p$ -value of  $<0.05$ . Multivariable analysis showed that age at assessment (OR = 1.02; 95% CI = 1.00 - 1.03;  $P= 0.016$ ) and non-White ethnicity (Black OR = 4.30, 95% CI = 2.92 - 6.31,  $P= < 0.001$ ; South Asian OR = 2.42, 95% CI = 1.50 - 3.93,  $P= <0.001$ ) were associated with confirmed COVID-19 infection. There was no significant interaction between ethnicity and vitamin D deficiency (OR = 0.90; 95% CI = 0.66 - 1.23;  $P= 0.515$ ). Median vitamin D concentration at recruitment was lower for people with subsequent confirmed COVID-19 infection (28.7 [IQR 10.0-43.8] nmol/l) than for other participants (32.7 [IQR 10.0-47.2] nmol/l) ( $P= <0.01$ ). Although univariable analysis suggested an association between vitamin D and COVID-19 (OR=0.99; 95% CI 0.99 – 0.999;  $P=0.013$ ), this association became insignificant (OR=1.00; 95% CI = 0.998-1.01;  $P=0.208$ ) after adjustment for covariates.<sup>70</sup>

Ilie et al., 2020<sup>71</sup> used an ecological study design reporting on 20 European countries as at 8th April 2020; the data pertains to mean levels of vitamin D, cases of COVID-19 infection per million population and deaths from COVID-19 per million population. The authors performed Pearson Correlation Coefficient Calculations and reported a negative correlation between mean levels of vitamin D (Mean 56.79 nmol/l, SD 10.61) and numbers of cases of COVID-19 infection per million population in each country (Mean cases 1393.4, SD 1129.984,  $r(20) = -0.44$ ;  $P = 0.05$ ). Additionally, a negative correlation was reported between mean vitamin D levels and the number of deaths caused by COVID-19 per million population in each country (Mean 80.42, SD 94.61,  $r(20) = -0.4378$ ;  $P = 0.05$ ). Sweden had the highest mean level of vitamin D (73.5 nmol/l) compared to Spain which had a mean level of 42.5 nmol/l). The number of cases of COVID-19 per million population was 834 in Sweden and 3,137 in Spain. Likewise, at the time of the study, there were 68 deaths from COVID-19 per million population in Sweden and 314 in Spain.



### Vitamin D supplementation

Fasano et al., 2020<sup>74</sup> investigated patients in a case-control phone survey in Lombardy, Italy. COVID-19 diagnosis was confirmed using a nasopharyngeal swab or probable based on : a) presence of persistent COVID-19-related symptoms ( $\geq 3$  including fever or  $\geq 5$  without fever); or b)  $\geq 1$  symptom in presence of suggestive chest radiologic signs; and/or c) living with a family member with a confirmed diagnosis of COVID-19. 1,486 participants were included in the survey (32 confirmed COVID-19, 73 probable COVID-19 and 1,381 unaffected). Confirmed/probable COVID-19 cases (mean age = 70.5 [Standard Deviation [SD] = 10.1]; male = 53%) self-reported a significantly lower intake of vitamin D supplementation (12.4%) compared to unaffected cases (22.9%; mean age = 73.0 [SD = 9.5], male = 57%). The age-adjusted OR (OR 0.56 [95% CI = 0.32-0.99], P= 0.048) suggested a protective effect of vitamin D intake.

### Subgroup evaluation

We planned to perform subgroup analyses by age and ethnicity. According to Hastie et al., 2020<sup>70</sup> multivariable analysis showed that age at assessment (OR = 1.02; 95% CI = 1.00 - 1.03; P= 0.016) and non-White ethnicity (Black OR = 4.30, 95% CI = 2.92 - 6.31, P= < 0.001; South Asians OR = 2.42, 95% CI = 1.50 - 3.93, P= <0.001) were associated with confirmed COVID-19 infection. However, Hastie et al found no significant interaction between ethnicity and vitamin D deficiency (OR = 0.90; 95% CI = 0.66 - 1.23; P= 0.515).

### Discussion

This systematic review of non-randomised studies has shown no robust evidence of an association between vitamin D and COVID-19 infection. We identified four studies for inclusion in a narrative synthesis which were all at high or unclear risk of bias. A univariable analysis of data from the UK Biobank database revealed an association between vitamin D and COVID-19 infection (OR=0.99; 95% CI 0.99 – 0.999; P=0.013). However, this association became insignificant (OR=1.00; 95% CI=0.998-1.01; P=0.208) after adjustment for 13 other covariates, suggesting that the initial association was due to one or more confounding variables.<sup>70</sup> This view is further strengthened by the demonstration of highly significant associations between age and ethnicity characteristics as predictor variables, and COVID-19 infection as the outcome variable. Overall, the UK Biobank study showed no effect, however it should be noted that the UK Biobank data included only one measurement of Vitamin D levels taken between 10 and 14 years prior to the outbreak of COVID-19. This is a significant study limitation.

Liu et al., 2020<sup>75</sup> concluded that patients over 60 years experienced more severe manifestations and had longer disease courses of COVID-19 compared to patients below 60 years.<sup>75</sup> And other studies have shown that older (rather than younger) people are more likely to die from COVID-19 infection.<sup>76-79</sup>

1  
2  
3 Non-White people are known to be more susceptible to COVID-19 infection and tend to  
4 develop worse outcomes,<sup>80</sup> a finding that our review has further substantiated.<sup>70</sup> Ethnicity is  
5 a multi-faceted construct that includes genetic make-up, socio-cultural identity and  
6 behavioural patterns.<sup>81</sup> It has been shown to be associated with differing susceptibility and  
7 treatment outcomes in a number of diseases.<sup>82 83 84</sup> Hastie et al., 2020<sup>[#ref]</sup> did not find any  
8 interaction between ethnicity and vitamin D deficiency and although Ilie et al 2020<sup>71</sup>  
9 identified a relationship, the study is subject to ecological bias. Ilie et al 2020<sup>71</sup> compared  
10 vitamin D levels and rates of COVID-19 infection across 20 European countries, and therefore  
11 many relevant factors were not accounted for in the analysis. Given the findings so far from  
12 our review we consider that there is paucity of data on vitamin D levels and morbidity and  
13 mortality from COVID-19 and there is no evidence from RCTs on outcomes of vitamin D  
14 supplementation on severity of symptoms or mortality to date. However a relationship  
15 between ethnicity, vitamin D (serum levels or supplementation) and susceptibility to or  
16 severity of COVID-19 infection cannot yet be ruled out.

17  
18 Risk of bias assessments demonstrate that all studies were at high or unclear risk of bias. All  
19 studies were observational designs and therefore subject to confounding. The persistent calls  
20 for high-dose vitamin D supplementation<sup>85</sup> arise from speculation about presumed  
21 mechanisms.<sup>86 87</sup> Our systematic review found no robust evidence that low levels of Vitamin  
22 D are associated with an increased likelihood of COVID-19 infection. More robust prognostic  
23 studies could be combined in a systematic review where a prognostic factor research question  
24 is phrased, and considerations of participation, attrition, prognostic factor measurement,  
25 confounding measurement and account, outcome measurement, and analysis and reporting  
26 are evaluated.

27  
28 Our systematic review identified no relevant RCTs, nevertheless we are aware of two ongoing  
29 RCTs investigating the effects of vitamin D on COVID-19, the ZnD3-CoVici study, France  
30 (NCT04351490)<sup>88</sup> and the CoVitTrial, France (NCT04344041).<sup>89</sup> Both trials have an estimated  
31 study completion date of July 2020. Inclusion of data from these studies in future systematic  
32 reviews and meta-analyses may enable us to potentially draw better stronger conclusions on  
33 this topic. Results from the ongoing international VITDALIZE Study (NCT03188796) may also  
34 contribute to our understanding of the effect of high dose vitamin D3 on mortality.<sup>90</sup>

### 35 36 37 38 39 40 41 42 43 44 45 46 47 48 49 **Study limitations**

50  
51 We performed a full systematic review of the published evidence available, and simultaneous  
52 independent screening, data extraction and risk of bias assessments. However, our study is  
53 limited by the small amount of evidence available which was, moreover, at risk of bias. This  
54 limits the inferences that can be drawn. Seven eligible studies were excluded because they  
55 are not available as peer reviewed publications.<sup>63-69</sup> If published, these seven studies would  
56 be included in a future update of this review. A final limitation is that the review was restricted  
57  
58  
59  
60

1  
2  
3 to English language only. Therefore, articles published in other languages may have been  
4 excluded.  
5  
6

### 7 **Implications for practice**

8  
9 Our review does not provide evidence for or against additional or high dose vitamin D  
10 supplementation specifically in relation to COVID-19. Treatment as standard practice for  
11 people who are deficient is pre-existing practice across Europe<sup>23</sup> the US<sup>91</sup> and in the UK.<sup>21</sup>  
12 Current guidelines from PHE suggest that the entire UK population should take vitamin D  
13 supplements to prevent vitamin D deficiency in winter or with inadequate sunlight exposure  
14 to sun in summer.<sup>21</sup> This review does not give evidence to drive a change in this current  
15 advice. Treatment recommendations for patients should be updated following the  
16 publication of results from ongoing and new well designed adequately powered randomised  
17 controlled trials  
18  
19  
20  
21  
22

### 23 **Conclusion**

24 This systematic review identified no robust evidence to enable us to assess an association  
25 between vitamin D supplementation or level with susceptibility to COVID-19 infection  
26 including clinical course, morbidity and mortality outcomes. All studies were at high or  
27 unclear risk of bias. Both age and ethnicity were associated with vitamin D levels even after  
28 multivariable adjustment. Black and South Asian people had a much higher risk of confirmed  
29 COVID-19 compared to White people. However, there was no interaction between the  
30 association of ethnicity and vitamin D deficiency with COVID-19. There were no papers  
31 reporting association of vitamin D with severity of symptoms or mortality due to COVID-19.  
32  
33  
34  
35  
36  
37  
38  
39  
40  
41  
42  
43  
44  
45  
46  
47  
48  
49  
50  
51  
52  
53  
54  
55  
56  
57  
58  
59  
60

**Acknowledgements:**

We thank Mrs Kath Charters, Welsh Ambulance Services NHS Trust for comments on the study design and drafts of this manuscript and for valuable advice and helpful discussions.

**Contributorship statement:**

SK, AG and AC conceived the study. AG, AC, NMCC, SK, STP and OU designed the study. RC and AB developed the search strategies, performed all searches and database management and created the bibliography. AG, AC, AM, OO, MZ screened titles and abstracts for inclusion. AG, OO, AM, MZ, LAK, AC screened at full text and extracted and analysed data. OO, AM, MZ, LAK performed risk of bias assessments. AC, SK and NMCC assisted in the interpretation from a clinical perspective. STP, LAK, OU offered technical and methodological support. AG and OO wrote the first draft, all authors revised content. All authors approved the final manuscript. AG and AC are the guarantors. The corresponding author attests that all listed authors meet authorship criteria and that no others meeting the criteria have been omitted.

**Copyright/license for publication:**

The Corresponding Author has the right to grant on behalf of all authors and does grant on behalf of all authors, a worldwide licence to the Publishers and its licensees in perpetuity, in all forms, formats and media (whether known now or created in the future), to i) publish, reproduce, distribute, display and store the Contribution, ii) translate the Contribution into other languages, create adaptations, reprints, include within collections and create summaries, extracts and/or, abstracts of the Contribution, iii) create any other derivative work(s) based on the Contribution, iv) to exploit all subsidiary rights in the Contribution, v) the inclusion of electronic links from the Contribution to third party material where-ever it may be located; and, vi) licence any third party to do any or all of the above.

**Funding:**

Dr Amy Grove is supported by the National Institute for Health Research (NIHR) Advanced Fellowship Programme Reference (AF-300060). Dr Taylor-Phillips is supported by an NIHR Career Development Fellowship (CDF-2016-09-018). Prof Clarke and Dr Al-Khudairy are supported by the NIHR Applied Research Centre West Midlands (ARC-WM). All other authors, with the exception of Professor Uthman, Professor Kumar and Professor McCarthy, are supported by the NIHR, Evidence Synthesis Programme (HTA 14.25.05). The views expressed are those of the authors and not necessarily those of the NIHR or the Department of Health and Social Care.

**Competing interests:**

All authors have completed the ICMJE uniform disclosure form at [www.icmje.org/coi\\_disclosure.pdf](http://www.icmje.org/coi_disclosure.pdf) and declare: no support from any organisation for the submitted work; no competing interests with regards to the submitted work.

**Ethical statement:**

Not required

**Data sharing statement:**

The study protocol is available

Systematic review protocol registration: CRD42020182876 available online via PROSPERO at [https://www.crd.york.ac.uk/prospERO/display\\_record.php?ID=CRD42020182876](https://www.crd.york.ac.uk/prospERO/display_record.php?ID=CRD42020182876). All included studies are publicly available. Additional data are available upon reasonable request by emailing the corresponding author.

## References

1. World Health Organization. Coronavirus disease (COVID-19) pandemic. 2020. <https://www.who.int/emergencies/diseases/novel-coronavirus-2019>
2. NHS. Check if you or your child has coronavirus symptoms. 2020. <https://www.nhs.uk/conditions/coronavirus-covid-19/symptoms/#symptoms>
3. Argenziano MG, Bruce SL, Slater CL, et al. Characterization and clinical course of 1000 patients with coronavirus disease 2019 in New York: retrospective case series. *BMJ* 2020;369:m1996. doi: 10.1136/bmj.m1996
4. Matthay MA, Aldrich JM, Gotts JE. Treatment for severe acute respiratory distress syndrome from COVID-19. *Lancet Respir Med* 2020;8(5):433-34. doi: 10.1016/s2213-2600(20)30127-2
5. Gruber BM. Fenomen witaminy D [The phenomenon of vitamin D]. *Postepy Hig Med Dosw (Online)* 2015;69:127-39
6. Gruber-Bzura BM. Vitamin D and influenza: prevention or therapy? *Int J Mol Sci* 2018;19(8):2419. doi: 10.3390/ijms19082419
7. Holick MF. High prevalence of vitamin D inadequacy and implications for health. *Mayo Clin Proc* 2006;81(3):353-73. doi: 10.4065/81.3.353
8. Sigmundsdottir H, Pan J, Debes GF, et al. DCs metabolize sunlight-induced vitamin D3 to 'program' T cell attraction to the epidermal chemokine CCL27. *Nat Immunol* 2007;8(3):285-93. doi: 10.1038/ni1433
9. Kogawa M, Findlay DM, Anderson PH, et al. Osteoclastic metabolism of 25(OH)-vitamin D3: a potential mechanism for optimization of bone resorption. *Endocrinology* 2010;151(10):4613-25. doi: 10.1210/en.2010-0334
10. Jones G. Vitamin D safety: its mechanisms and application. *Standardy Medyczne, Pediatria* 2012;9:605-09
11. Kim D. The role of vitamin D in thyroid diseases. *Int J Mol Sci* 2017;18(9):1949. doi: 10.3390/ijms18091949
12. Beard JA, Bearden A, Striker R. Vitamin D and the anti-viral state. *J Clin Virol* 2011;50(3):194-200. doi: 10.1016/j.jcv.2010.12.006
13. Liu PT, Stenger S, Li H, et al. Toll-like receptor triggering of a vitamin D-mediated human antimicrobial response. *Science* 2006;311(5768):1770-3. doi: 10.1126/science.1123933
14. Adams JS, Ren S, Liu PT, et al. Vitamin D-directed rheostatic regulation of monocyte antibacterial responses. *J Immunol* 2009;182(7):4289-95. doi: 10.4049/jimmunol.0803736
15. Laaksi I. Vitamin D and respiratory infection in adults. *Proc Nutr Soc* 2012;71(1):90-7. doi: 10.1017/s0029665111003351
16. Sharifi A, Vahedi H, Nedjat S, Rafiei H, Hosseinzadeh-Attar MJ. Effect of single-dose injection of vitamin D on immune cytokines in ulcerative colitis patients: a randomized placebo-controlled trial. *APMIS* 2019;127(10):681-87. doi: 10.1111/apm.12982
17. Cantorna MT, Snyder L, Lin YD, Yang L. Vitamin D and 1,25(OH)<sub>2</sub>D regulation of T cells. *Nutrients* 2015;7(4):3011-21. doi: 10.3390/nu7043011
18. Jeffery LE, Burke F, Mura M, et al. 1,25-Dihydroxyvitamin D3 and IL-2 combine to inhibit T cell production of inflammatory cytokines and promote development of regulatory



- 1  
2  
3 T cells expressing CTLA-4 and FoxP3. *J Immunol* 2009;183(9):5458-67. doi:  
4 10.4049/jimmunol.0803217  
5  
6 19. Lei GS, Zhang C, Cheng BH, Lee CH. Mechanisms of action of vitamin D as supplemental  
7 therapy for pneumocystis pneumonia. *Antimicrob Agents Chemother*  
8 2017;61(10):e01226-17. doi: 10.1128/aac.01226-17  
9  
10 20. Colunga Biancatelli RML, Berrill M, Marik PE. The antiviral properties of vitamin C. *Expert*  
11 *Rev Anti Infect Ther* 2020;18(2):99-101. doi: 10.1080/14787210.2020.1706483  
12  
13 21. Scientific Advisory Committee on Nutrition. SACN vitamin D and health report. 21 July  
14 2016. [https://www.gov.uk/government/publications/sacn-vitamin-d-and-health-](https://www.gov.uk/government/publications/sacn-vitamin-d-and-health-report)  
15 [report](https://www.gov.uk/government/publications/sacn-vitamin-d-and-health-report)  
16  
17 22. National Institutes of Health, Office of Dietary Supplements. Vitamin D: fact sheet for  
18 health professionals. 24 March 2020. [https://ods.od.nih.gov/factsheets/VitaminD-](https://ods.od.nih.gov/factsheets/VitaminD-HealthProfessional/#h2)  
19 [HealthProfessional/#h2](https://ods.od.nih.gov/factsheets/VitaminD-HealthProfessional/#h2)  
20  
21 23. EFSA Panel on Dietetic Products, Nutrition and Allergies. Dietary reference values for  
22 vitamin D. *EFSA Journal* 2016;14(10):e04547. doi: 10.2903/j.efsa.2016.4547  
23  
24 24. Cao Z, Wu Y, Faucon E, Sabatier JM. SARS-CoV-2 & Covid-19: key-roles of the 'renin-  
25 angiotensin' system / vitamin D impacting drug and vaccine developments. *Infect*  
26 *Disord Drug Targets* 2020;20(1). doi: 10.2174/1871526520999200505174704  
27  
28 25. Jakovac H. COVID-19 and vitamin D: is there a link and an opportunity for intervention?  
29 *Am J Physiol Endocrinol Metab* 2020;318(5):E589. doi: 10.1152/ajpendo.00138.2020  
30  
31 26. Mitchell F. Vitamin-D and COVID-19: do deficient risk a poorer outcome? *Lancet*  
32 *Diabetes Endocrinol* 2020;8(7):570. doi: 10.1016/S2213-8587(20)30183-2  
33  
34 27. Silberstein M. Vitamin D: a simpler alternative to tocilizumab for trial in COVID-19? *Med*  
35 *Hypotheses* 2020;140:109767. doi: 10.1016/j.mehy.2020.109767  
36  
37 28. Calder PC, Carr AC, Gombart AF, Eggersdorfer M. Optimal nutritional status for a well-  
38 functioning immune system is an important factor to protect against viral infections.  
39 *Nutrients* 2020;12(4):1181. doi: <https://dx.doi.org/10.3390/nu12041181>  
40  
41 29. Tian Y, Rong L. Letter: Covid-19, and vitamin D. Authors' reply. *Aliment Pharmacol Ther*  
42 2020;51(10):995-96. doi: 10.1111/apt.15764  
43  
44 30. Busby M. UK public health bodies reviewing vitamin D's effects on coronavirus. The  
45 Guardian; 17 June 2020. [https://www.theguardian.com/world/2020/jun/17/uk-](https://www.theguardian.com/world/2020/jun/17/uk-ministers-order-urgent-vitamin-d-coronavirus-review)  
46 [ministers-order-urgent-vitamin-d-coronavirus-review](https://www.theguardian.com/world/2020/jun/17/uk-ministers-order-urgent-vitamin-d-coronavirus-review)  
47  
48 31. Coronavirus: Should I start taking vitamin D? BBC News; 18 June 2020.  
49 <https://www.bbc.co.uk/news/health-52371688>  
50  
51 32. Torjesen I. Covid-19: Public health agencies review whether vitamin D supplements  
52 could reduce risk. *BMJ* 2020;369:m2475. doi: 10.1136/bmj.m2475  
53  
54 33. Grant WB, Lahore H, McDonnell SL, et al. Evidence that vitamin D supplementation  
55 could reduce risk of influenza and COVID-19 infections and deaths. *Nutrients*  
56 2020;12(4):988. doi: 10.3390/nu12040988  
57  
58 34. Parker J, Hashmi O, Dutton D, et al. Levels of vitamin D and cardiometabolic disorders:  
59 systematic review and meta-analysis. *Maturitas* 2010;65(3):225-36. doi:  
60 10.1016/j.maturitas.2009.12.013  
35. Cannell JJ, Vieth R, Umhau JC, et al. Epidemic influenza and vitamin D. *Epidemiol Infect*  
2006;134(6):1129-40. doi: 10.1017/s0950268806007175  
36. Jolliffe DA, Griffiths CJ, Martineau AR. Vitamin D in the prevention of acute respiratory  
infection: systematic review of clinical studies. *J Steroid Biochem Mol Biol*  
2013;136:321-9. doi: 10.1016/j.jsbmb.2012.11.017



- 1
- 2
- 3
- 4 37. Nnoaham KE, Clarke A. Low serum vitamin D levels and tuberculosis: a systematic review
- 5 and meta-analysis. *Int J Epidemiol* 2008;37(1):113-19. doi: 10.1093/ije/dym247
- 6 38. Martineau AR, Jolliffe DA, Hooper RL, et al. Vitamin D supplementation to prevent acute
- 7 respiratory tract infections: systematic review and meta-analysis of individual
- 8 participant data. *BMJ* 2017;356:i6583. doi: 10.1136/bmj.i6583
- 9 39. Bolland MJ, Avenell A. Do Vitamin D supplements help prevent respiratory tract
- 10 infections? *BMJ* 2017;356:j456. doi: 10.1136/bmj.j456
- 11 40. National Institute for Health and Care Excellence. COVID-19 rapid evidence summary:
- 12 vitamin D for COVID-19. 29 June 2020.
- 13 <https://www.nice.org.uk/advice/es28/chapter/Key-messages>
- 14 41. Royal Society. Vitamin D and covid-19. 18 June 2020. [https://royalsociety.org/-](https://royalsociety.org/-/media/policy/projects/set-c/set-c-vitamin-d-and-covid-19.pdf)
- 15 [/media/policy/projects/set-c/set-c-vitamin-d-and-covid-19.pdf](https://royalsociety.org/-/media/policy/projects/set-c/set-c-vitamin-d-and-covid-19.pdf)
- 16 42. Lee J, van Hecke O, Roberts N, on behalf of the Oxford COVID-19 Evidence Service Team.
- 17 Vitamin D: a rapid review of the evidence for treatment or prevention in COVID-19.
- 18 Centre for Evidence-Based Medicine, University of Oxford; 1 May 2020.
- 19 [https://www.cebm.net/covid-19/vitamin-d-a-rapid-review-of-the-evidence-for-](https://www.cebm.net/covid-19/vitamin-d-a-rapid-review-of-the-evidence-for-treatment-or-prevention-in-covid-19/)
- 20 [treatment-or-prevention-in-covid-19/](https://www.cebm.net/covid-19/vitamin-d-a-rapid-review-of-the-evidence-for-treatment-or-prevention-in-covid-19/)
- 21 43. Moher D, Liberati A, Tetzlaff J, Altman DG. Preferred reporting items for systematic
- 22 reviews and meta-analyses: the PRISMA statement. *BMJ* 2009;339:b2535. doi:
- 23 10.1136/bmj.b2535
- 24 44. World Health Organization. Global research on coronavirus disease (COVID-19) [online
- 25 database]. 2020. [https://www.who.int/emergencies/diseases/novel-coronavirus-](https://www.who.int/emergencies/diseases/novel-coronavirus-2019/global-research-on-novel-coronavirus-2019-ncov)
- 26 [2019/global-research-on-novel-coronavirus-2019-ncov](https://www.who.int/emergencies/diseases/novel-coronavirus-2019/global-research-on-novel-coronavirus-2019-ncov)
- 27 45. Oxford COVID-19 Evidence Service. Centre for Evidence-Based Medicine, University of
- 28 Oxford; 2020. <https://www.cebm.net/oxford-covid-19-evidence-service/>
- 29 46. Counotte M, Imeri H, Ipekci M, Low N. Living evidence on COVID-19 [online database].
- 30 University of Bern Institute of Social and Preventive Medicine; 2020.
- 31 <https://zika.ispm.unibe.ch/assets/data/pub/ncov/>
- 32 47. Centers for Disease Control and Prevention. CDC SARS response timeline. 2013.
- 33 <https://www.cdc.gov/about/history/sars/timeline.htm>
- 34 48. Downs SH, Black N. The feasibility of creating a checklist for the assessment of the
- 35 methodological quality both of randomised and non-randomised studies of health
- 36 care interventions. *J Epidemiol Community Health* 1998;52(6):377-84. doi:
- 37 10.1136/jech.52.6.377
- 38 49. Carter SJ, Baranuskas MN, Fly AD. Considerations for obesity, vitamin D, and physical
- 39 activity amidst the COVID-19 pandemic. *Obesity (Silver Spring)* 2020;28:1176-77. doi:
- 40 10.1002/oby.22838
- 41 50. Molloy EJ, Murphy N. Vitamin D, covid-19 and children. *Ir Med J* 2020;113(4):64
- 42 51. McCartney DM, Byrne DG. Optimisation of vitamin D status for enhanced immuno-
- 43 protection against covid-19. *Ir Med J* 2020;113(4):P58
- 44 52. Adams KK, Baker WL, Sobieraj DM. Myth busters: dietary supplements and COVID-19.
- 45 *Ann Pharmacother* 2020;54(8):820-26. doi: 10.1177/1060028020928052
- 46 53. de Lucena TMC, da Silva Santos AF, de Lima BR, de Albuquerque Borborema ME, de
- 47 Azevedo Silva J. Mechanism of inflammatory response in associated comorbidities in
- 48 COVID-19. *Diabetes Metab Syndr* 2020;14(4):597-600. doi:
- 49 10.1016/j.dsx.2020.05.025
- 50
- 51
- 52
- 53
- 54
- 55
- 56
- 57
- 58
- 59
- 60

- 1
- 2
- 3
- 4 54. Ghasemian R, Shamshirian A, Heydari K, et al. The role of vitamin D in the age of COVID-
- 5 19: a systematic review and meta-analysis along with an ecological approach.
- 6 *medRxiv* 2020. doi: 10.1101/2020.06.05.20123554
- 7
- 8 55. Hribar CA, Cobbold PH, Church FC. Potential role of vitamin D in the elderly to resist
- 9 COVID-19 and to slow progression of Parkinson's disease. *Brain Sci* 2020;10(5):284.
- 10 doi: 10.3390/brainsci10050284
- 11
- 12 56. Laird E, Rhodes J, Kenny RA. Vitamin D and inflammation: potential implications for
- 13 severity of Covid-19. *Ir Med J* 2020;113(5):P81
- 14
- 15 57. McKenna MJ, Flynn MAT. Covid-19, cocooning and vitamin D intake requirements. *Ir*
- 16 *Med J* 2020;113(5):P79
- 17
- 18 58. Ribeiro H, Santana KVS, Oliver SL, et al. Does vitamin D play a role in the management of
- 19 Covid-19 in Brazil? *Rev Saude Publica* 2020;54:53
- 20
- 21 59. Speeckaert MM, Delanghe JR. Association between low vitamin D and COVID-19: don't
- 22 forget the vitamin D binding protein. *Aging Clin Exp Res* 2020. doi: 10.1007/s40520-
- 23 020-01607-y
- 24
- 25 60. Suresh PS. Hypovitaminosis D and COVID-19: matter of concern in India? *Indian J Clin*
- 26 *Biochem* 2020. doi: 10.1007/s12291-020-00894-6
- 27
- 28 61. Tan SHS, Hong CC, Saha S, Murphy D, Hui JH. Medications in COVID-19 patients:
- 29 summarizing the current literature from an orthopaedic perspective. *Int Orthop*
- 30 2020. doi: 10.1007/s00264-020-04643-5
- 31
- 32 62. Zabetakis I, Lordan R, Norton C, Tsoupras A. COVID-19: the inflammation link and the
- 33 role of nutrition in potential mitigation. *Nutrients* 2020;12(5):1466. doi:
- 34 10.3390/nu12051466
- 35
- 36 63. Lau FH, Majumder R, Torabi R, et al. Vitamin D insufficiency is prevalent in severe
- 37 COVID-19. *medRxiv* 2020. doi: 10.1101/2020.04.24.20075838
- 38
- 39 64. Darling AL, Ahmadi KR, Ward KA, et al. Vitamin D status, body mass index, ethnicity and
- 40 COVID-19: initial analysis of the first-reported UK Biobank COVID-19 positive cases (n
- 41 580) compared with negative controls (n 723). *medRxiv* 2020. doi:
- 42 10.1101/2020.04.29.20084277
- 43
- 44 65. De Smet D, De Smet K, Herroelen P, Gryspeerdt S, Martens GA. Vitamin D deficiency as
- 45 risk factor for severe COVID-19: a convergence of two pandemics. *medRxiv* 2020.
- 46 doi: 10.1101/2020.05.01.20079376
- 47
- 48 66. Meltzer DO, Best TJ, Zhang H, Vokes T, Arora V, Solway J. Association of vitamin D
- 49 deficiency and treatment with COVID-19 incidence. *medRxiv* 2020. doi:
- 50 10.1101/2020.05.08.20095893
- 51
- 52 67. Notari A, Torrieri G. COVID-19 transmission risk factors. *medRxiv* 2020. doi:
- 53 10.1101/2020.05.08.20095083
- 54
- 55 68. Raisi-Estabragh Z, McCracken C, Bethell MS, et al. Greater risk of severe COVID-19 in
- 56 non-White ethnicities is not explained by cardiometabolic, socioeconomic, or
- 57 behavioural factors, or by 25(OH)-vitamin D status: study of 1,326 cases from the UK
- 58 Biobank. *medRxiv* 2020. doi: 10.1101/2020.06.01.20118943
- 59
- 60 69. Tan CW, Ho LP, Kalimuddin S, et al. A cohort study to evaluate the effect of combination
- vitamin D, magnesium and vitamin B12 (DMB) on progression to severe outcome in
- older COVID-19 patients. *medRxiv* 2020. doi: 10.1101/2020.06.01.20112334
70. Hastie CE, Mackay DF, Ho F, et al. Vitamin D concentrations and COVID-19 infection in
- UK Biobank. *Diabetes Metab Syndr* 2020;14(4):561-65. doi:
- 10.1016/j.dsx.2020.04.050

- 1  
2  
3  
4  
5  
6  
7  
8  
9  
10  
11  
12  
13  
14  
15  
16  
17  
18  
19  
20  
21  
22  
23  
24  
25  
26  
27  
28  
29  
30  
31  
32  
33  
34  
35  
36  
37  
38  
39  
40  
41  
42  
43  
44  
45  
46  
47  
48  
49  
50  
51  
52  
53  
54  
55  
56  
57  
58  
59  
60
71. Ilie PC, Stefanescu S, Smith L. The role of vitamin D in the prevention of coronavirus disease 2019 infection and mortality. *Aging Clin Exp Res* 2020. doi: 10.1007/s40520-020-01570-8
  72. UK Biobank. About UK Biobank. 17 June 2020. <https://www.ukbiobank.ac.uk/about-biobank-uk/>
  73. D'Avolio A, Avataneo V, Manca A, et al. 25-hydroxyvitamin D concentrations are lower in patients with positive PCR for SARS-CoV-2. *Nutrients* 2020;12(5):1359. doi: 10.3390/nu12051359
  74. Fasano A, Cereda E, Barichella M, et al. COVID-19 in Parkinson's Disease Patients Living in Lombardy, Italy. *Mov Disord* 2020. doi: 10.1002/mds.28176
  75. Liu Y, Mao B, Liang S, et al. Association between age and clinical characteristics and outcomes of COVID-19. *Eur Respir J* 2020;55(5):2001112. doi: 10.1183/13993003.01112-2020
  76. Verity R, Okell LC, Dorigatti I, et al. Estimates of the severity of coronavirus disease 2019: a model-based analysis. *Lancet Infect Dis* 2020;20(6):669-77. doi: 10.1016/s1473-3099(20)30243-7
  77. Mahase E. Covid-19: death rate is 0.66% and increases with age, study estimates. *BMJ* 2020;369:m1327. doi: 10.1136/bmj.m1327
  78. Fulzele S, Sahay B, Yusufu I, et al. COVID-19 virulence in aged patients might be impacted by the host cellular microRNAs abundance/profile. *Aging Dis* 2020;11(3):509-22. doi: 10.14336/ad.2020.0428
  79. Koff WC, Williams MA. Covid-19 and immunity in aging populations: a new research agenda. *N Engl J Med* 2020. doi: 10.1056/NEJMp2006761
  80. Pan D, Sze S, Minhas JS, et al. The impact of ethnicity on clinical outcomes in COVID-19: a systematic review. *EClinicalMedicine*. doi: 10.1016/j.eclinm.2020.100404
  81. Lee C. "Race" and "ethnicity" in biomedical research: how do scientists construct and explain differences in health? *Soc Sci Med* 2009;68(6):1183-90. doi: 10.1016/j.socscimed.2008.12.036
  82. Stead WW, Senner JW, Reddick WT, Lofgren JP. Racial differences in susceptibility to infection by Mycobacterium tuberculosis. *N Engl J Med* 1990;322(7):422-7. doi: 10.1056/nejm199002153220702
  83. Nahid P, Horne DJ, Jarlsberg LG, et al. Racial differences in tuberculosis infection in United States communities: the coronary artery risk development in young adults study. *Clin Infect Dis* 2011;53(3):291-4. doi: 10.1093/cid/cir378
  84. Bime C, Poongkunran C, Borgstrom M, et al. Racial differences in mortality from severe acute respiratory failure in the United States, 2008-2012. *Ann Am Thorac Soc* 2016;13(12):2184-89. doi: 10.1513/AnnalsATS.201605-359OC
  85. Lanham-New SA, Webb AR, Cashman KD, et al. Vitamin D and SARS-CoV-2 virus/COVID-19 disease. *BMJ Nutrition, Prevention & Health* 2020:bmjnph-2020-000089. doi: 10.1136/bmjnph-2020-000089
  86. Huang F, Zhang C, Liu Q, et al. Identification of amitriptyline HCl, flavin adenine dinucleotide, azacitidine and calcitriol as repurposing drugs for influenza A H5N1 virus-induced lung injury. *PLoS Pathog* 2020;16(3):e1008341. doi: 10.1371/journal.ppat.1008341
  87. Lee C. Controversial effects of vitamin D and related genes on viral infections, pathogenesis, and treatment outcomes. *Nutrients* 2020;12(4):962. doi: 10.3390/nu12040962

- 1  
2  
3 88. Impact of zinc and vitamin D3 supplementation on the survival of aged patients infected  
4 with COVID-19. NCT04351490. ClinicalTrials.gov, U.S. National Library of Medicine;  
5 2020. <https://ClinicalTrials.gov/show/NCT04351490>  
6  
7 89. COvid-19 and Vitamin D supplementation: a multicenter randomized controlled trial of  
8 high dose versus standard dose vitamin D3 in high-risk COVID-19 Patients  
9 (CoVitTrial). NCT04344041. ClinicalTrials.gov, U.S. National Library of Medicine;  
10 2020. <https://clinicaltrials.gov/show/NCT04344041>  
11  
12 90. The VITDALIZE Study: effect of high-dose vitamin D3 on 28-day mortality in adult  
13 critically ill patients. NCT03188796. ClinicalTrials.gov, U.S. National Library of  
14 Medicine; 2017. <https://ClinicalTrials.gov/show/NCT03188796>  
15  
16 91. Scientific Advisory Committee on Nutrition, European Food Safety Authority. Joint  
17 explanatory note by the European Food Safety Authority and the UK Scientific  
18 Advisory Committee on Nutrition regarding dietary reference values for vitamin D.  
19 2016.  
20 [https://www.efsa.europa.eu/sites/default/files/documents/news/explanatory\\_note](https://www.efsa.europa.eu/sites/default/files/documents/news/explanatory_note_EFSA_SACN_vitaminD.pdf)  
21 [\\_EFSA\\_SACN\\_vitaminD.pdf](https://www.efsa.europa.eu/sites/default/files/documents/news/explanatory_note_EFSA_SACN_vitaminD.pdf)  
22  
23  
24  
25

## 26 **Figure legends**

27  
28 Figure 1. PRISMA flow diagram for the selection of studies  
29  
30  
31  
32  
33  
34  
35  
36  
37  
38  
39  
40  
41  
42  
43  
44  
45  
46  
47  
48  
49  
50  
51  
52  
53  
54  
55  
56  
57  
58  
59  
60



## Supplemental file

### Contents

1. Full record of search
2. Full details of the study eligibility criteria
3. List of studies excluded at full text review
4. Articles included at full text, but later excluded at time of narrative synthesis
5. Quality assessment of included studies

#### 1. Full record of search

#### Medline (Ovid)

Search date: 06/05/2020

Database: Ovid MEDLINE(R) ALL <1946 to May 05, 2020>

Search Strategy:

- 
- 1 exp Vitamin D/ (58492)
  - 2 Vitamin D Deficiency/ (15552)
  - 3 (vitamin D? or vit D? or D vitamin? or ergocalciferol or cholecalciferol or colecalciferol or calciferol or dihydroergocalciferol or sitocalciferol or dihydrotachysterol or dihydroxycholecalciferol? or hydroxycholecalciferol? or "25(OH)D?" or 25OHD? or calcidiol or hydroxyergocalciferol or alfacalcidol or alphacalcidol or "1,25(OH)2D" or hydroxyvitamin D? or dihydroxyvitamin D?).ab,kf,ti. (78232)
  - 4 (paricalcitol or doxercalciferol or doxerocalciferol or calcifediol or calcitriol).ab,kf,ti. (5577)
  - 5 hypovitaminosis D?.ab,kf,ti. (1775)
  - 6 ((D or D2 or D3) adj3 supplement\*).ab,kf,ti. (12158)
  - 7 1 or 2 or 3 or 4 or 5 or 6 (92560)
  - 8 coronavirus/ or betacoronavirus/ or betacoronavirus 1/ or coronavirus oc43, human/ or middle east respiratory syndrome coronavirus/ or sars virus/ (7431)
  - 9 coronavirus infections/ or severe acute respiratory syndrome/ (10675)
  - 10 (((corona\* or corono\*) adj1 (virus\* or viral\* or virinae\*)) or coronavirus\* or coronovirus\* or coronavirinae\* or Coronavirus\* or Coronovirus\* or Wuhan\* or Hubei\* or Huanan or "2019-nCoV" or 2019nCoV or nCoV2019 or "nCoV-2019" or "COVID-19" or COVID19 or "CORVID-19" or CORVID19 or "WN-CoV" or WNCov or "HCoV-19" or HCoV19 or CoV or "2019 novel\*" or Ncov or "n-cov" or "SARS-CoV-2" or "SARSCoV-2" or "SARSCoV2" or "SARS-CoV2" or SARSCov19 or "SARS-Cov19" or "SARSCov-19" or "SARS-Cov-19" or Ncovor or Ncorona\* or Ncorono\* or NcovWuhan\* or NcovHubei\* or NcovChina\* or NcovChinese\*).ab,kf,ti. (26891)
  - 11 (severe acute respiratory syndrome or SARS or Middle East respiratory syndrome or MERS).ab,kf,ti. (16560)
  - 12 (betacoronavirus\* or betacoronavirinae\*).ab,kf,ti. (280)
  - 13 8 or 9 or 10 or 11 or 12 (37180)
  - 14 7 and 13 (32)
  - 15 exp Animals/ (23144176)



- 1  
2  
3 16 exp Humans/ (18448248)  
4 17 15 not 16 (4695928)  
5 18 14 not 17 (30)  
6 19 limit 18 to yr="2002 -Current" (30)  
7  
8

### Update

- 9  
10 Search date: 10/6/2020  
11 Actual databases searched: Ovid MEDLINE All <1946 to June 09, 2020>  
12 Search strategy:  
13 Re-ran search above plus...  
14 20 limit 19 to ed=20200506-20200610 (8)  
15 21 limit 19 to ep=20200506-20200610 (39)  
16 22 limit 19 to dt=20200506-20200610 (43)  
17 23 limit 19 to ez=20200506-20200610 (27)  
18 24 20 or 21 or 22 or 23 (46)  
19  
20  
21  
22

### Embase (Ovid)

- 23  
24 Search date: 06/05/2020  
25 Database: Embase <1974 to 2020 May 05>  
26 Search Strategy:  
27  
28

- 29  
30 1 exp vitamin D/ (139781)  
31 2 vitamin D deficiency/ (29333)  
32 3 (vitamin D? or vit D? or D vitamin? or ergocalciferol or cholecalciferol or colecalciferol or  
33 calciferol or dihydroergocalciferol or sitocalciferol or dihydrotachysterol or dihydroxycholecalciferol?  
34 or hydroxycholecalciferol? or "25(OH)D?" or 25OHD? or calcidiol or hydroxyergocalciferol or  
35 alfacalcidol or alphacalcidol or "1,25(OH)2D" or hydroxyvitamin D? or dihydroxyvitamin D?).ab,kw,ti.  
36 (112459)  
37 4 (paricalcitol or doxercalciferol or doxerocalciferol or calcifediol or calcitriol).ab,kw,ti. (8478)  
38 5 hypovitaminosis D?.ab,kw,ti. (3012)  
39 6 ((D or D2 or D3) adj3 supplement\*).ab,kw,ti. (19177)  
40 7 1 or 2 or 3 or 4 or 5 or 6 (163395)  
41 8 betacoronavirus 1/ or betacoronavirus/ or human coronavirus oc43/ (696)  
42 9 Middle East respiratory syndrome coronavirus/ (2028)  
43 10 sars-related coronavirus/ or sars coronavirus/ (6354)  
44 11 Coronavirinae/ (2231)  
45 12 coronavirus infection/ or middle east respiratory syndrome/ or severe acute respiratory  
46 syndrome/ (11950)  
47 13 (((corona\* or corono\*) adj1 (virus\* or viral\* or virinae\*)) or coronavirus\* or coronovirus\* or  
48 coronavirinae\* or Coronavirus\* or Coronovirus\* or Wuhan\* or Hubei\* or Huanan or "2019-nCoV" or  
49 2019nCoV or nCoV2019 or "nCoV-2019" or "COVID-19" or COVID19 or "CORVID-19" or CORVID19 or  
50 "WN-CoV" or WNCov or "HCoV-19" or HCoV19 or CoV or "2019 novel\*" or Ncov or "n-cov" or "SARS-  
51 CoV-2" or "SARSCoV-2" or "SARSCoV2" or "SARS-CoV2" or SARSCov19 or "SARS-Cov19" or "SARSCov-  
52 19" or "SARS-Cov-19" or Ncover or Ncorona\* or Ncorono\* or NcovWuhan\* or NcovHubei\* or  
53 NcovChina\* or NcovChinese\*).ab,kw,ti. (27686)  
54 14 (severe acute respiratory syndrome or SARS or Middle East respiratory syndrome or  
55 MERS).ab,kw,ti. (17146)  
56 15 (betacoronavirus\* or betacoronavirinae\*).ab,kw,ti. (275)  
57 16 8 or 9 or 10 or 11 or 12 or 13 or 14 or 15 (40716)  
58  
59  
60



1  
2  
3 17 7 and 16 (61)  
4 18 exp animal/ (25459151)  
5 19 exp human/ (20834835)  
6 20 18 not 19 (4624316)  
7 21 17 not 20 (58)  
8 22 limit 21 to yr="2002 -Current" (58)  
9

10  
11 Update

12 Search date: 10/6/2020  
13 Actual databases searched: Ovid Embase <1974 to 2020 June 09>  
14 Search strategy:  
15 Re-ran search above plus...  
16 22 limit 21 to yr="2002 -Current" (123)  
17 23 limit 22 to dd=20200506-20200610 (39)  
18 24 limit 22 to em=202005-202006 (0)  
19 25 limit 22 to dc=20200506-20200610 (62)  
20 26 23 or 24 or 25 (62)  
21  
22  
23

24 **Medrxiv** (searched via Medrxivr <https://mcguinlu.shinyapps.io/medrxivr/>)  
25

26 Search date: 07/05/2020  
27 Search Strategy:  
28

29 Topic 1:  
30

31 [Vv]itamin D  
32 [Vv]itamin D2  
33 [Vv]itamin D3  
34 calciferol  
35 25OHD  
36 25OHD3  
37 [Hh]ypovitaminosis D  
38  
39  
40

41 Topic 2:  
42

43 [Cc]oronavirus  
44 [Cc]orona(\s)([:graph:]+\s){0,1}virus  
45 [Cc]oronavirinae  
46 [Cc]ovid  
47 COVID  
48 nCoV  
49 NCOV  
50 Ncov  
51 [Nn]-cov  
52 N-COV  
53 2019ncov  
54 2019-ncov  
55 ncov2019  
56 ncov-2019  
57  
58  
59  
60

1  
2  
3 SARS

4 [Ss]evere [Aa]cute [Rr]espiratory [Ss]yndrome

5 [Mm]iddle [Ee]ast [Rr]espiratory [Ss]yndrome

6 MERS  
7

8  
9 Earliest record date

10 20190101

11 Latest record date

12 20200507

13 Remove older versions of the same record  
14

15 6 results  
16

17 Update

18 Search date: 10/6/2020

19 Re-ran search above changing record dates as follows:

20 Earliest record date

21 20200507

22 Latest record date

23 20200610

24 Remove older versions of the same record  
25  
26

27 11 results  
28  
29

30  
31 **BioRxiv**

32 <https://www.biorxiv.org/>

33  
34 Search date: 07/05/2020  
35

36 65 Results

37 for abstract or title "vitamin D" (match phrase words)  
38  
39

40 22 Results

41 for full text or abstract or title "ergocalciferol cholecalciferol colecalciferol" (match whole any)  
42  
43

44 41 Results

45 for full text or abstract or title "25OHD 25OHD3" (match whole any)  
46

47 Imported into EndNote and de-duplicated

48 92 results after deduplication  
49

50 Searched in Endnote using the following search strategy:

51 coronavirus or corona or covid or SARS or MERS or betacoronavirus or ncov

52 *Any Field*  
53

54 5 results  
55  
56

57  
58 Update

59 Search date: 10/6/2020  
60

## 1 Results

for abstract or title "vitamin D" (match phrase words) and posted between "07 May, 2020 and 10 Jun, 2020" – *animal study (also in both results sets below) so not exported to EndNote*

## 3 Results

for full text or abstract or title "ergocalciferol cholecalciferol colecalciferol" (match whole any) and posted between "07 May, 2020 and 10 Jun, 2020" - *2 animal studies and 1 on sertraline in TB*

## 2 Results

for full text or abstract or title "25OHD 25OHD3" (match whole any) and posted between "07 May, 2020 and 10 Jun, 2020" - *1 animal study, 1 non-clinical / non-coronavirus*

0 results relevant to coronaviruses

**Cochrane Library**

Search date: 08/05/2020

| ID  | Search                                                                                                                                                                                                                                                                                                                                                                                                                                                                                                                                                                                                          | Hits  |
|-----|-----------------------------------------------------------------------------------------------------------------------------------------------------------------------------------------------------------------------------------------------------------------------------------------------------------------------------------------------------------------------------------------------------------------------------------------------------------------------------------------------------------------------------------------------------------------------------------------------------------------|-------|
| #1  | MeSH descriptor: [Vitamin D] explode all trees                                                                                                                                                                                                                                                                                                                                                                                                                                                                                                                                                                  | 5224  |
| #2  | MeSH descriptor: [Vitamin D Deficiency] this term only                                                                                                                                                                                                                                                                                                                                                                                                                                                                                                                                                          | 1226  |
| #3  | ((vitamin NEXT D?) or (vit NEXT D?) or (D NEXT vitamin?) or ergocalciferol or cholecalciferol or colecalciferol or calciferol or dihydroergocalciferol or sitocalciferol or dihydrotachysterol or dihydroxycholecalciferol? or hydroxycholecalciferol? or "25(OH)D" or "25(OH)D3" or 25OHD? or calcdiol or hydroxyergocalciferol or alfalcidol or alphacalcidol or "1,25(OH)2D" or (hydroxyvitamin NEXT D?) or (dihydroxyvitamin NEXT D?):ti,ab,kw                                                                                                                                                              | 12959 |
| #4  | (paricalcitol or doxercalciferol or doxerocalciferol or calcifediol or calcitriol):ti,ab,kw                                                                                                                                                                                                                                                                                                                                                                                                                                                                                                                     | 2417  |
| #5  | hypovitaminosis NEXT D?                                                                                                                                                                                                                                                                                                                                                                                                                                                                                                                                                                                         | 303   |
| #6  | ((D OR D2 OR D3) NEAR/3 supplement*):ti,ab,kw                                                                                                                                                                                                                                                                                                                                                                                                                                                                                                                                                                   | 5633  |
| #7  | #1 or #2 or #3 or #4 or #5 or #6                                                                                                                                                                                                                                                                                                                                                                                                                                                                                                                                                                                | 14461 |
| #8  | MeSH descriptor: [Coronavirus] this term only                                                                                                                                                                                                                                                                                                                                                                                                                                                                                                                                                                   | 2     |
| #9  | MeSH descriptor: [Betacoronavirus] this term only                                                                                                                                                                                                                                                                                                                                                                                                                                                                                                                                                               | 2     |
| #10 | MeSH descriptor: [Betacoronavirus 1] this term only                                                                                                                                                                                                                                                                                                                                                                                                                                                                                                                                                             | 0     |
| #11 | MeSH descriptor: [Coronavirus OC43, Human] this term only                                                                                                                                                                                                                                                                                                                                                                                                                                                                                                                                                       | 0     |
| #12 | MeSH descriptor: [Middle East Respiratory Syndrome Coronavirus] explode all trees                                                                                                                                                                                                                                                                                                                                                                                                                                                                                                                               | 1     |
| #13 | MeSH descriptor: [SARS Virus] this term only                                                                                                                                                                                                                                                                                                                                                                                                                                                                                                                                                                    | 9     |
| #14 | MeSH descriptor: [Coronavirus Infections] this term only                                                                                                                                                                                                                                                                                                                                                                                                                                                                                                                                                        | 137   |
| #15 | MeSH descriptor: [Severe Acute Respiratory Syndrome] this term only                                                                                                                                                                                                                                                                                                                                                                                                                                                                                                                                             | 107   |
| #16 | ((((corona* or corono*) near/1 (virus* or viral* or virinae*)) or coronavirus* or coronavirus* or coronavirinae* or Coronavirus* or Coronavirus* or Wuhan* or Hubei* or Huanan or "2019-nCoV" or 2019nCoV or nCoV2019 or "nCoV-2019" or "COVID-19" or COVID19 or "CORVID-19" or CORVID19 or "WN-CoV" or WNCov or "HCoV-19" or HCoV19 or CoV or "2019 novel*" or Ncov or "n-cov" or "SARS-CoV-2" or "SARSCoV-2" or "SARSCoV2" or "SARS-CoV2" or SARSCov19 or "SARS-Cov19" or "SARSCov-19" or "SARS-Cov-19" or Ncover or Ncorona* or Ncorono* or NcovWuhan* or NcovHubei* or NcovChina* or NcovChinese*):ti,ab,kw | 614   |
| #17 | ("severe acute respiratory syndrome" or SARS or "Middle East respiratory syndrome" or MERS):ti,ab,kw                                                                                                                                                                                                                                                                                                                                                                                                                                                                                                            | 350   |
| #18 | (betacoronavirus* or betacoronavirinae*):ti,ab,kw                                                                                                                                                                                                                                                                                                                                                                                                                                                                                                                                                               | 4     |

1  
2  
3 #19 #8 or #9 or #10 or #11 or #12 or #13 or #14 or #15 or #16 or #17 or #18 798  
4 #20 #7 and #19 3  
5

6 [all 3 results were from CENTRAL]  
7

8 Update

9 Search date: 10/06/2020

10 Re-ran search exactly as above and retrieved 5 results, all from CENTRAL. All 5 results exported to  
11 EndNote for deduplication.  
12  
13

14  
15 **Database of publications (living map of evidence) on coronavirus disease (COVID-19) developed by**  
16 **the University of Bern**  
17

18 Living Evidence on COVID-19

19 Contributors: Michel Counotte, Hira Imeri, Mert Ipekci, Nicola Low  
20  
21

22 <https://zika.ispm.unibe.ch/assets/data/pub/ncov/>  
23  
24

25 Search date: 10/05/2020 (14,988 entries)  
26

27 Search: Title, Abstract

28 Search:  
29

30 vitamin D 13  
31 vitamin D2 0  
32 vitamin D3 0  
33 ergocalciferol 0  
34 cholecalciferol 0  
35 coledalciferol 0  
36 25(OH)D 0  
37 25OHD 0  
38 25(OH)D3 0  
39 25OHD3 0  
40 hypovitaminosis D 1  
41 Vitamin D Deficiency 1  
42  
43  
44  
45

46 **Oxford COVID-19 Evidence Service**

47 <https://www.cebm.net/oxford-covid-19-evidence-service/>

48 The Centre for Evidence-Based Medicine (CEBM) The University of Oxford  
49

50 Search date: 10/05/2020 (142 articles)

51 vitamin D 1  
52 vitamin D2 0  
53 vitamin D3 0  
54 ergocalciferol 0  
55 cholecalciferol 0  
56 coledalciferol 0  
57 25(OH)D 0  
58 25OHD 0  
59  
60

1  
2  
3 25(OH)D3 0  
4 25OHD3 0  
5 hypovitaminosis D 0  
6 Vitamin D Deficiency 0  
7  
8  
9

10 **Database of publications on coronavirus disease (COVID-19) developed by WHO**

11 [https://www.who.int/emergencies/diseases/novel-coronavirus-2019/global-research-on-novel-](https://www.who.int/emergencies/diseases/novel-coronavirus-2019/global-research-on-novel-coronavirus-2019-ncov)  
12 [coronavirus-2019-ncov](https://www.who.int/emergencies/diseases/novel-coronavirus-2019/global-research-on-novel-coronavirus-2019-ncov)  
13

14 Search date: 10/05/2020 (15,253 entries)

15  
16 Search: Title, Abstract, Subject

17  
18  
19 vitamin D 19  
20 vitamin D2 0  
21 vitamin D3 2  
22 ergocalciferol 0  
23 cholecalciferol 1  
24 coilecalciferol 0  
25 25(OH)D 0  
26 25OHD 0  
27 25(OH)D3 0  
28 25OHD3 0  
29 hypovitaminosis D 1  
30 Vitamin D Deficiency 2  
31  
32

33 Total: 25

34 After de-duplication: 20  
35  
36  
37

38 **Searches for systematic reviews, for reference checking**

39  
40 **Medline**

41  
42 Search date: 19/05/2020

43 Database: Ovid MEDLINE(R) ALL <1946 to May 18, 2020>

44 Search Strategy:  
45  
46 -----

47 1 exp Vitamin D/ (58577)  
48 2 Vitamin D Deficiency/ (15588)  
49 3 (vitamin D? or vit D? or D vitamin? or ergocalciferol or cholecalciferol or coilecalciferol or  
50 calciferol or dihydroergocalciferol or sitocalciferol or dihydrotachysterol or dihydroxycholecalciferol?  
51 or hydroxycholecalciferol? or "25(OH)D?" or 25OHD? or calcidiol or hydroxyergocalciferol or  
52 alfalcidol or alphacalcidol or "1,25(OH)2D" or hydroxyvitamin D? or dihydroxyvitamin D?).ab,kf,ti.  
53 (78395)  
54 4 (paricalcitol or doxercalciferol or doxerocalciferol or calcifediol or calcitriol).ab,kf,ti. (5588)  
55 5 hypovitaminosis D?.ab,kf,ti. (1780)  
56 6 ((D or D2 or D3) adj3 supplement\*).ab,kf,ti. (12198)  
57 7 1 or 2 or 3 or 4 or 5 or 6 (92747)  
58  
59  
60

- 1  
2  
3 8 coronavirus/ or betacoronavirus/ or betacoronavirus 1/ or coronavirus oc43, human/ or middle  
4 east respiratory syndrome coronavirus/ or sars virus/ (8161)  
5 9 coronavirus infections/ or severe acute respiratory syndrome/ (11614)  
6 10 (((corona\* or corono\*) adj1 (virus\* or viral\* or virinae\*)) or coronavirus\* or coronovirus\* or  
7 coronavirinae\* or Coronavirus\* or Coronovirus\* or Wuhan\* or Hubei\* or Huanan or "2019-nCoV" or  
8 2019nCoV or nCoV2019 or "nCoV-2019" or "COVID-19" or COVID19 or "CORVID-19" or CORVID19 or  
9 "WN-CoV" or WNCov or "HCoV-19" or HCoV19 or CoV or "2019 novel\*" or Ncov or "n-cov" or "SARS-  
10 CoV-2" or "SARSCoV-2" or "SARSCoV2" or "SARS-CoV2" or SARSCov19 or "SARS-Cov19" or "SARSCov-  
11 19" or "SARS-Cov-19" or Ncovor or Ncorona\* or Ncorono\* or NcovWuhan\* or NcovHubei\* or  
12 NcovChina\* or NcovChinese\*).ab,kf,ti. (31115)  
13 11 (severe acute respiratory syndrome or SARS or Middle East respiratory syndrome or  
14 MERS).ab,kf,ti. (17795)  
15 12 (betacoronavirus\* or betacoronavirinae\*).ab,kf,ti. (294)  
16 13 exp Respiratory Tract Infections/ (356696)  
17 14 (acute respiratory infection\* or severe respiratory infection\* or acute respiratory tract  
18 infection\* or severe respiratory tract infection\* or influenza or common cold or pneumonia or  
19 bronchitis).ab,kf,ti. (234266)  
20 15 8 or 9 or 10 or 11 or 12 or 13 or 14 (503079)  
21 16 7 and 15 (1062)  
22 17 (metaanalys\* or "meta analys\*" or "meta-analys\*").tw. (169008)  
23 18 (systematic\* adj3 review\*).mp. (200684)  
24 19 meta analysis.pt. (114746)  
25 20 17 or 18 or 19 (301767)  
26 21 16 and 20 (55)  
27  
28  
29  
30  
31  
32

### Embase

33  
34 Search date: 19/05/2020

35  
36 Database: Embase Classic+Embase <1947 to 2020 Week 20>

37 Search Strategy:

- 38 -----  
39  
40 1 exp vitamin D/ (147053)  
41 2 vitamin D deficiency/ (30106)  
42 3 (vitamin D? or vit D? or D vitamin? or ergocalciferol or cholecalciferol or colecalciferol or  
43 calciferol or dihydroergocalciferol or sitocalciferol or dihydrotachysterol or dihydroxycholecalciferol?  
44 or hydroxycholecalciferol? or "25(OH)D?" or 25OHD? or calcidiol or hydroxyergocalciferol or  
45 alfalcidol or alphacalcidol or "1,25(OH)2D" or hydroxyvitamin D? or dihydroxyvitamin D?).ab,kw,ti.  
46 (118981)  
47 4 (paricalcitol or doxercalciferol or doxerocalciferol or calcifediol or calcitriol).ab,kw,ti. (8485)  
48 5 hypovitaminosis D?.ab,kw,ti. (3033)  
49 6 ((D or D2 or D3) adj3 supplement\*).ab,kw,ti. (19335)  
50 7 1 or 2 or 3 or 4 or 5 or 6 (172654)  
51 8 betacoronavirus 1/ or betacoronavirus/ or human coronavirus oc43/ (1085)  
52 9 Middle East respiratory syndrome coronavirus/ (2082)  
53 10 sars-related coronavirus/ or sars coronavirus/ (6062)  
54 11 Coronavirinae/ (2060)  
55 12 coronavirus infection/ or middle east respiratory syndrome/ or severe acute respiratory  
56 syndrome/ (12565)  
57  
58  
59  
60

1  
2  
3 13 (((corona\* or corono\*) adj1 (virus\* or viral\* or virinae\*)) or coronavirus\* or coronavirus\* or  
4 coronavirinae\* or Coronavirus\* or Coronavirus\* or Wuhan\* or Hubei\* or Huanan or "2019-nCoV" or  
5 2019nCoV or nCoV2019 or "nCoV-2019" or "COVID-19" or COVID19 or "CORVID-19" or CORVID19 or  
6 "WN-CoV" or WNCov or "HCoV-19" or HCoV19 or CoV or "2019 novel\*" or Ncov or "n-cov" or "SARS-  
7 CoV-2" or "SARSCoV-2" or "SARSCoV2" or "SARS-CoV2" or SARSCov19 or "SARS-Cov19" or "SARSCov-  
8 19" or "SARS-Cov-19" or Ncovor or Ncorona\* or Ncorono\* or NcovWuhan\* or NcovHubei\* or  
9 NcovChina\* or NcovChinese\*).ab,kw,ti. (30532)  
10  
11 14 (severe acute respiratory syndrome or SARS or Middle East respiratory syndrome or  
12 MERS).ab,kw,ti. (17954)  
13 15 (betacoronavirus\* or betacoronavirinae\*).ab,kw,ti. (286)  
14 16 exp respiratory tract infection/ (460049)  
15 17 (acute respiratory infection\* or severe respiratory infection\* or acute respiratory tract  
16 infection\* or severe respiratory tract infection\* or influenza or common cold or pneumonia or  
17 bronchitis).ab,kw,ti. (329779)  
18 18 8 or 9 or 10 or 11 or 12 or 13 or 14 or 15 or 16 or 17 (674800)  
19 19 7 and 18 (3315)  
20 20 (metaanalys\* or "meta analys\*" or "meta-analys\*").mp. (294469)  
21 21 (systematic\* adj2 review\*).mp. (330720)  
22 22 20 or 21 (475492)  
23 23 19 and 22 (219)  
24 24 limit 19 to (meta analysis or "systematic review") (145)  
25 25 23 or 24 (219)  
26 26 limit 25 to (conference abstract or conference paper or "conference review" or editorial or  
27 letter) (41)  
28 27 25 not 26 (178)

### Cochrane Database of Systematic Reviews (Cochrane Library)

Search Name: Vitamin D Covid and Acute Respiratory Infections SRs

Date Run: 20/05/2020 18:30:28

Comment:

| ID  | Search                                                                                                                                                                                                                                                                                                                                                                                                                                              | Hits  |
|-----|-----------------------------------------------------------------------------------------------------------------------------------------------------------------------------------------------------------------------------------------------------------------------------------------------------------------------------------------------------------------------------------------------------------------------------------------------------|-------|
| #1  | MeSH descriptor: [Vitamin D] explode all trees                                                                                                                                                                                                                                                                                                                                                                                                      | 5224  |
| #2  | MeSH descriptor: [Vitamin D Deficiency] this term only                                                                                                                                                                                                                                                                                                                                                                                              | 1226  |
| #3  | ((vitamin NEXT D?) or (vit NEXT D?) or (D NEXT vitamin?) or ergocalciferol or cholecalciferol or colecalciferol or calciferol or dihydroergocalciferol or sitocalciferol or dihydrotachysterol or dihydroxycholecalciferol? or hydroxycholecalciferol? or "25(OH)D" or "25(OH)D3" or 25OHD? or calcdiol or hydroxyergocalciferol or alfalcidol or alphacalcidol or "1,25(OH)2D" or (hydroxyvitamin NEXT D?) or (dihydroxyvitamin NEXT D?)):ti,ab,kw | 12959 |
| #4  | (paricalcitol or doxercalciferol or doxerocalciferol or calcifediol or calcitriol):ti,ab,kw                                                                                                                                                                                                                                                                                                                                                         | 2417  |
| #5  | hypovitaminosis NEXT D?                                                                                                                                                                                                                                                                                                                                                                                                                             | 303   |
| #6  | ((D OR D2 OR D3) NEAR/3 supplement*):ti,ab,kw                                                                                                                                                                                                                                                                                                                                                                                                       | 5632  |
| #7  | #1 or #2 or #3 or #4 or #5 or #6                                                                                                                                                                                                                                                                                                                                                                                                                    | 14461 |
| #8  | MeSH descriptor: [Coronavirus] this term only                                                                                                                                                                                                                                                                                                                                                                                                       | 2     |
| #9  | MeSH descriptor: [Betacoronavirus] this term only                                                                                                                                                                                                                                                                                                                                                                                                   | 2     |
| #10 | MeSH descriptor: [Betacoronavirus 1] this term only                                                                                                                                                                                                                                                                                                                                                                                                 | 0     |
| #11 | MeSH descriptor: [Coronavirus OC43, Human] this term only                                                                                                                                                                                                                                                                                                                                                                                           | 0     |
| #12 | MeSH descriptor: [Middle East Respiratory Syndrome Coronavirus] explode all trees                                                                                                                                                                                                                                                                                                                                                                   | 1     |

- 1  
2  
3 #13 MeSH descriptor: [SARS Virus] this term only 9  
4 #14 MeSH descriptor: [Coronavirus Infections] this term only 137  
5 #15 MeSH descriptor: [Severe Acute Respiratory Syndrome] this term only 107  
6 #16 (((corona\* or corono\*) near/1 (virus\* or viral\* or virinae\*)) or coronavirus\* or coronavirus\*  
7 or coronavirinae\* or Coronavirus\* or Coronavirus\* or Wuhan\* or Hubei\* or Huanan or "2019-nCoV"  
8 or 2019nCoV or nCoV2019 or "nCoV-2019" or "COVID-19" or COVID19 or "CORVID-19" or CORVID19  
9 or "WN-CoV" or WNCov or "HCoV-19" or HCoV19 or CoV or "2019 novel\*" or Ncov or "n-cov" or  
10 "SARS-CoV-2" or "SARSCoV-2" or "SARSCoV2" or "SARS-CoV2" or SARSCov19 or "SARS-Cov19" or  
11 "SARSCov-19" or "SARS-Cov-19" or Ncover or Ncorona\* or Ncorono\* or NcovWuhan\* or NcovHubei\*  
12 or NcovChina\* or NcovChinese\*):ti,ab,kw 616  
13 #17 ("severe acute respiratory syndrome" or SARS or "Middle East respiratory syndrome" or  
14 MERS):ti,ab,kw 351  
15 #18 (betacoronavirus\* or betacoronavirinae\*):ti,ab,kw 4  
16 #19 MeSH descriptor: [Respiratory Tract Infections] explode all trees 14360  
17 #20 (("acute respiratory" NEXT infection\*) or ("severe respiratory" NEXT infection\*) or ("acute  
18 respiratory tract" NEXT infection\*) or ("severe respiratory tract" NEXT infection\*) or influenza or  
19 "common cold" or pneumonia or bronchitis):ti,ab,kw 25944  
20 #21 #8 or #9 or #10 or #11 or #12 or #13 or #14 or #15 or #16 or #17 or #18 or #19 or #20  
21 32554  
22 #22 #7 and #21 329

23  
24  
25  
26  
27 CDSR: 3

### 28 29 **Expert consultation**

30  
31 One additional study identified:

32  
33 Martineau AR, Jolliffe DA, Hooper RL, et al., (2017) Vitamin D supplementation to prevent acute  
34 respiratory tract infections: systematic review and meta-analysis of individual participant data. BMJ.  
35 2017;356:i6583. doi:10.1136/bmj.i6583  
36  
37  
38  
39  
40  
41  
42  
43  
44  
45  
46  
47  
48  
49  
50  
51  
52  
53  
54  
55  
56  
57  
58  
59  
60



2. Full details of the study eligibility criteria

| Include                                                                                                                                                                                                                                                                                                                                                                                                                                                                                                                                                                                                                                                                                                                                                                                                                                                                                                                                                                                                                                                                                                                                                                                                                                                                                                                                                                                                                                                                                                                                        | Exclude                                                                                                                                                                                                                 |
|------------------------------------------------------------------------------------------------------------------------------------------------------------------------------------------------------------------------------------------------------------------------------------------------------------------------------------------------------------------------------------------------------------------------------------------------------------------------------------------------------------------------------------------------------------------------------------------------------------------------------------------------------------------------------------------------------------------------------------------------------------------------------------------------------------------------------------------------------------------------------------------------------------------------------------------------------------------------------------------------------------------------------------------------------------------------------------------------------------------------------------------------------------------------------------------------------------------------------------------------------------------------------------------------------------------------------------------------------------------------------------------------------------------------------------------------------------------------------------------------------------------------------------------------|-------------------------------------------------------------------------------------------------------------------------------------------------------------------------------------------------------------------------|
| <p><b>P- Population</b></p> <ol style="list-style-type: none"> <li>1) Patients acutely ill with Betacoronavirus infection [SARS-CoV, MERS-CoV, SARS-CoV-2]</li> <li>2) or at risk of acute illness with Betacoronavirus infection</li> </ol> <p><b>I – Intervention/exposure</b></p> <ol style="list-style-type: none"> <li>1) Vitamin D supplementation</li> <li>2) Low Serum Vitamin D</li> </ol> <p><b>O - Outcomes</b></p> <ol style="list-style-type: none"> <li>1) Betacoronavirus infection (to include serological evidence of infection or clinically confirmed symptomatic infection);</li> <li>2) severity of Betacoronavirus infection (to include patients admitted to hospital or admitted to intensive care); mortality due to Betacoronavirus.</li> <li>3) Mortality due to Betacoronavirus</li> </ol> <p><b>C – Comparator</b></p> <ol style="list-style-type: none"> <li>1) No Vitamin D supplementation</li> <li>2) high or normal Serum Vitamin D</li> </ol> <p><b>S - Study design</b><br/>Randomised controlled trials and non-randomized studies will be eligible for inclusion in the review including, non randomized controlled trials, interrupted time series, controlled before-and-after studies, cohort studies, ecological studies, case reports and case series.</p> <p><b>Subgroups</b></p> <ol style="list-style-type: none"> <li>1. Ethnicity characteristics (White British, All Other White, Mixed, Asian, Black, Other)</li> <li>2. Age characteristics (population by five-year age groups)</li> </ol> | <p>Animals studies, modelling studies</p> <p>Qualitative studies, Non-primary research- reviews, editorials etc, guidelines and non-systematic reviews.</p> <p>Non-English language. Non peer reviewed publication.</p> |

### 3. List of studies excluded at full text review

|    | Excluded studies                                                                                                                                                                                                                                                                                                            | Reason                                                 |
|----|-----------------------------------------------------------------------------------------------------------------------------------------------------------------------------------------------------------------------------------------------------------------------------------------------------------------------------|--------------------------------------------------------|
| 1  | Adams, K. K., et al. (2020). "Myth Busters: Dietary Supplements and COVID-19." <u>Annals of Pharmacotherapy</u> : 1060028020928052.                                                                                                                                                                                         | Study design – commentary                              |
| 2  | Ahmed, I., et al. (2020). "First Covid-19 maternal mortality in the UK associated with thrombotic complications." <u>British Journal of Haematology</u> . <b>18</b> .                                                                                                                                                       | Study design – letter                                  |
| 3  | Alpalhao, M. and P. Filipe (2020). "SARS-CoV-2 pandemic and Vitamin D deficiency - a double trouble." <u>Photodermatology, Photoimmunology &amp; Photomedicine</u> <b>01</b> : 01.                                                                                                                                          | Study design – letter                                  |
| 4  | Annweiler, C., et al. (2020). COvid-19 and Vitamin D Supplementation: a Multicenter Randomized Controlled Trial of High Dose Versus Standard Dose Vitamin D3 in High-risk COVID-19 Patients (CoVitTrial). <a href="https://clinicaltrials.gov/show/NCT04344041">https://clinicaltrials.gov/show/NCT04344041</a> .           | Study design – on-going RCT completion date. July 2020 |
| 5  | Arya, A. and V. D. Dwivedi (2020). "Synergistic effect of vitamin D and remdesivir can fight COVID-19." <u>Journal of Biomolecular Structure &amp; Dynamics</u> : 1-2                                                                                                                                                       | Study design – letter                                  |
| 6  | Banerjee, D., et al. (2020). "COVID-19 infection in kidney transplant recipients." <u>Kidney International</u> <b>97</b> (6): 1076-1082.                                                                                                                                                                                    | Study design – commentary                              |
| 7  | Caccialanza, R., et al. (2020). Early nutritional supplementation in non-critically ill patients hospitalized for the 2019 novel coronavirus disease (COVID-19): Rationale and feasibility of a shared pragmatic protocol. <u>Nutrition</u> : 110835.                                                                       | Study design - protocol                                |
| 8  | Calder, P. C., et al. (2020). Optimal Nutritional Status for a Well-Functioning Immune System Is an Important Factor to Protect against Viral Infections. <u>Nutrients</u> : <b>12</b> (4), 1181.                                                                                                                           | Study design -narrative review                         |
| 9  | Cao, Z., et al. (2020). SARS-CoV-2 & Covid-19: Key-Roles of the 'Renin-Angiotensin' System / Vitamin D Impacting Drug and Vaccine Developments. <u>Infectious Disorders - Drug Targets</u> . (E-pub Ahead of Print) DOI : <a href="https://doi.org/10.2174/1871526520999200505174704">10.2174/1871526520999200505174704</a> | Study design – editorial                               |
| 10 | Carter, S. J., et al. (2020). Considerations for obesity, vitamin D, and physical activity amidst the COVID-19 pandemic. <u>Obesity</u> <b>16</b> : 16.                                                                                                                                                                     | Study design -narrative review                         |

|    |                                                                                                                                                                                                                                                                                                              |                                                  |
|----|--------------------------------------------------------------------------------------------------------------------------------------------------------------------------------------------------------------------------------------------------------------------------------------------------------------|--------------------------------------------------|
| 11 | Daneshkhah, A., et al. (2020). The Possible Role of Vitamin D in Suppressing Cytokine Storm and Associated Mortality in COVID-19 Patients. <u>medRxiv</u> . DOI: <a href="https://doi.org/10.1101/2020.04.08.20058578">https://doi.org/10.1101/2020.04.08.20058578</a>                                       | Study design – modelling                         |
| 12 | Davies G, Garami AR, Byers JC. Evidence Supports a Causal Model for Vitamin D in COVID-19 Outcomes. <u>medRxiv</u> , 2020. DOR: <a href="https://doi.org/10.1101/2020.05.01.20087965v3">https://doi.org/10.1101/2020.05.01.20087965v3</a>                                                                    | Study design – modelling                         |
| 13 | de Lucena, T. M. C., et al. (2020). "Mechanism of inflammatory response in associated comorbidities in COVID-19." <u>Diabetes &amp; Metabolic Syndrome</u> <b>14</b> (4): 597-600.                                                                                                                           | Study design -narrative review                   |
| 14 | Eroglu, C., et al. (2019). The relation between serum vitamin D levels, viral infections and severity of attacks in children with recurrent wheezing. <u>Allergologia et Immunopathologia</u> <b>47</b> (6): 591-597.                                                                                        | Population - Not COVID-19/SARs/MERs              |
| 15 | Faul, J. L., et al. (2020). "Vitamin d deficiency and ards after sars-cov-2 infection." <u>Irish Medical Journal</u> <b>113</b> (5).                                                                                                                                                                         | Study design – letter                            |
| 16 | Ghasemian, R., et al. (2020). "The Role of Vitamin D in The Age of COVID-19: A Systematic Review and Meta-Analysis Along with an Ecological Approach." <u>MedRxiv : the Preprint Server for Health Sciences</u> . DOI: <a href="https://doi.org/10.1101/2020.06.05.20123554">10.1101/2020.06.05.20123554</a> | Study design -narrative review                   |
| 17 | Grant, W. B., et al. (2020). Evidence that Vitamin D Supplementation Could Reduce Risk of Influenza and COVID-19 Infections and Deaths. <u>Nutrients</u> <b>12</b> (4): 02.                                                                                                                                  | Study design -narrative review                   |
| 18 | Heiser, K., et al. (2020). Identification of potential treatments for COVID-19 through artificial intelligence-enabled phenomic analysis of human cells infected with SARS-CoV-2. <u>bioRxiv</u> : 2020.2004.2021.054387.                                                                                    | Study design – modelling                         |
| 19 | Hribar, C. A., et al. (2020). "Potential Role of Vitamin D in the Elderly to Resist COVID-19 and to Slow Progression of Parkinson's Disease." <u>Brain Sciences</u> <b>10</b> (5): 08.                                                                                                                       | Study design -narrative review                   |
| 20 | Jakovac, H. (2020). COVID-19 and vitamin D-Is there a link and an opportunity for intervention? <u>American Journal of Physiology - Endocrinology &amp; Metabolism</u> <b>318</b> (5): E589-E589.                                                                                                            | Study design – letter                            |
| 21 | Jamaati, H., et al. (2020). A fourteen-day experience with coronavirus disease 2019 (COVID-19) induced acute respiratory distress syndrome (ARDS): An Iranian treatment protocol. <u>Iranian Journal of Pharmaceutical Research</u> <b>19</b> (1): 31-36.                                                    | Study design – treatment protocol/recommendation |
| 22 | Kalippurayil Moozhipurath, R., et al. (2020). "Evidence of Protective Role of Ultraviolet-B (UVB) Radiation in                                                                                                                                                                                               | Exposure – not vitamin D( UVB)                   |

|    |                                                                                                                                                                                                                                                                                                           |                                             |
|----|-----------------------------------------------------------------------------------------------------------------------------------------------------------------------------------------------------------------------------------------------------------------------------------------------------------|---------------------------------------------|
|    | Reducing COVID-19 Deaths." <u>MedRxiv : the Preprint Server for Health Sciences</u> .<br>DOI 10.1101/2020.05.06.20093419                                                                                                                                                                                  |                                             |
| 23 | Kara, M., et al. (2020). "'Scientific Strabismus' or Two Related Pandemics: COVID-19 & Vitamin D Deficiency." <u>British Journal of Nutrition</u> : 1-20.                                                                                                                                                 | Study design -narrative review              |
| 24 | Koivisto, O., et al. (2020). Key Vitamin D Target Genes with Functions in the Immune System. <u>Nutrients</u> , <b>12</b> (4):1140.                                                                                                                                                                       | Population - Outcomes - target genes        |
| 25 | Kow, C. S., et al. (2020). "Vitamin D Supplementation in Influenza and COVID-19 Infections Comment on: "Evidence that Vitamin D Supplementation Could Reduce Risk of Influenza and COVID-19 Infections and Deaths" <u>Nutrients</u> 2020, 12(4), 988." <u>Nutrients</u> <b>12</b> (6): 01.                | Study design – commentary                   |
| 26 | Kumar, V. and A. Srivastava (2020). "Spurious Correlation? A review of the relationship between Vitamin D and Covid-19 infection and mortality." <u>MedRxiv : the Preprint Server for Health Sciences</u> .<br>DOI: 10.1101/2020.05.25.20110338                                                           | Study design -narrative review              |
| 27 | Laird, E., et al. (2020). "Vitamin D and inflammation: Potential implications for severity of Covid-19." <u>Irish Medical Journal</u> <b>113</b> (5).                                                                                                                                                     | Study design -narrative review              |
| 28 | La Vignera, S., et al. (2020). Sex-Specific SARS-CoV-2 Mortality: Among Hormone-Modulated ACE2 Expression, Risk of Venous Thromboembolism and Hypovitaminosis D. <u>International journal of molecular sciences</u> <b>21</b> (8):2948.                                                                   | Study design – editorial                    |
| 29 | Li, A. Y., et al. (2020). Multivariate Analysis of Factors Affecting COVID-19 Case and Death Rate in U.S. Counties: The Significant Effects of Black Race and Temperature. <u>medRxiv</u> .<br>DOI: <a href="https://doi.org/10.1101/2020.04.17.20069708">https://doi.org/10.1101/2020.04.17.20069708</a> | Intervention – not Vitamin D                |
| 30 | Maestri, E., et al. (2020). Vitamin D and coronavirus: a new field of use?. <u>Recenti Progressi in Medicina</u> <b>111</b> (4): 253-256.                                                                                                                                                                 | Study design -narrative review, non-English |
| 31 | Mansbach, J. M. and C. A. Camargo Jr., (2009). Respiratory Viruses in Bronchiolitis and Their Link to Recurrent Wheezing and Asthma. <u>Clinics in Laboratory Medicine</u> <b>29</b> (4): 741-755.                                                                                                        | Population - Not COVID-19/SARs/MERs         |
| 32 | Marik, P. E., et al. (2020). Does vitamin D status impact mortality from SARS-CoV-2 infection? <u>Medicine in Drug Discovery</u> : 100041-100041.                                                                                                                                                         | Study design - commentary                   |
| 33 | McKenna, M. J. and M. A. T. Flynn (2020). "Covid-19, cocooning and vitamin d intake requirements." <u>Irish Medical Journal</u> <b>113</b> (5).                                                                                                                                                           | Study design -narrative review              |

|    |                                                                                                                                                                                                                                                     |                                               |
|----|-----------------------------------------------------------------------------------------------------------------------------------------------------------------------------------------------------------------------------------------------------|-----------------------------------------------|
| 34 | Mitchell, F. (2020). "Vitamin-D and COVID-19: do deficient risk a poorer outcome?" <u>The Lancet Diabetes &amp; Endocrinology</u> <b>20</b> : 20.                                                                                                   | Study design -narrative review                |
| 35 | Molloy, E. J. and N. Murphy (2020). Vitamin D, Covid-19 and Children. <u>Irish Medical Journal</u> <b>113</b> (4): 64.                                                                                                                              | Study design -narrative review                |
| 36 | McCartney, D. M. and D. G. Byrne (2020). Optimisation of Vitamin D Status for Enhanced Immuno-protection Against Covid-19. <u>Irish Medical Journal</u> <b>113</b> (4): 58.                                                                         | Study design -narrative review                |
| 37 | Rabbitt, L. and E. Slattery (2020). "Vitamin d and covid-19: A note of caution." <u>Irish Medical Journal</u> <b>113</b> (5).                                                                                                                       | Study design - letter                         |
| 38 | Ribeiro, H., et al. (2020). "Does Vitamin D play a role in the management of Covid-19 in Brazil?" <u>Revista de Saude Publica</u> <b>54</b> : 53.                                                                                                   | Study design -narrative review                |
| 39 | Romano, L., et al. (2020). "Short Report - Medical nutrition therapy for critically ill patients with COVID-19." <u>European Review for Medical and Pharmacological Sciences</u> <b>24</b> (7): 4035-4039.                                          | Study design -narrative review                |
| 40 | Silberstein, M. (2020). Vitamin D: A simpler alternative to tocilizumab for trial in COVID-19? <u>Medical Hypotheses</u> <b>140</b> : 109767-109767.                                                                                                | Study design -narrative review                |
| 41 | Speeckaert, M. M. and J. R. Delanghe (2020). "Association between low vitamin D and COVID-19: don't forget the vitamin D binding protein." <u>Aging Clinical &amp; Experimental Research</u> <b>28</b> : 28.                                        | Study design - letter                         |
| 42 | Skutsch, M., et al. (2020). "The association of UV with rates of COVID-19 transmission and deaths in Mexico: the possible mediating role of vitamin D." <u>MedRxiv : the Preprint Server for Health Sciences</u> . DOI: 10.1101/2020.05.25.20112805 | Study design – modelling                      |
| 43 | Suresh, P. S. (2020). "Hypovitaminosis D and COVID-19: Matter of Concern in India?" <u>Indian Journal of Clinical Biochemistry</u> .                                                                                                                | Study design - letter                         |
| 44 | Taghizadieh, A., et al. (2020). "Acute kidney injury in pregnant women following SARS-CoV-2 infection: A case report from Iran." <u>Respiratory Medicine Case Reports</u> <b>30</b>                                                                 | Exposure – not vitamin D                      |
| 45 | Tan, S. H. S., et al. (2020). "Medications in COVID-19 patients: summarizing the current literature from an orthopaedic perspective." <u>International Orthopaedics</u> <b>22</b> : 22.                                                             | Study design -narrative review                |
| 46 | Yalaki, Z., et al. (2019). Comparison of viral agents and vitamin D levels in children with acute bronchiolitis infection. <u>Cocuk Enfeksiyon Dergisi</u> <b>13</b> (1): e14-e20.                                                                  | Population - COVID-19/SARs/MERs not specified |
| 47 | Zabetakis, I., et al. (2020). "COVID-19: The Inflammation Link and the Role of Nutrition in Potential Mitigation." <u>Nutrients</u> <b>12</b> (5): 19.                                                                                              | Study design -narrative review                |

|    |                                                                                                                                          |                           |
|----|------------------------------------------------------------------------------------------------------------------------------------------|---------------------------|
| 48 | Zemb, P., et al. (2020). "Vitamin D deficiency and COVID-19 pandemic." <u>Journal of Global Antimicrobial Resistance</u> <b>28</b> : 28. | Study design - commentary |
|----|------------------------------------------------------------------------------------------------------------------------------------------|---------------------------|

#### 4. Articles included at full text, but later excluded at time of narrative synthesis

|    | Citation record                                                                                                                                                                                                                                                                                                                                                                                                      | Exclusion reason                                             | Update performed 8 <sup>th</sup> October 2020                                                                                                                                                                    |
|----|----------------------------------------------------------------------------------------------------------------------------------------------------------------------------------------------------------------------------------------------------------------------------------------------------------------------------------------------------------------------------------------------------------------------|--------------------------------------------------------------|------------------------------------------------------------------------------------------------------------------------------------------------------------------------------------------------------------------|
| 49 | Darling, A. L., et al. (2020). Vitamin D status, body mass index, ethnicity and COVID-19: Initial analysis of the first-reported UK Biobank COVID-19 positive cases (n 580) compared with negative controls (n 723). <u>medRxiv</u> .<br><br><a href="https://www.medrxiv.org/content/10.1101/2020.04.29.20084277v1?versioned=TRUE">https://www.medrxiv.org/content/10.1101/2020.04.29.20084277v1?versioned=TRUE</a> | Not peer reviewed publication at time of narrative synthesis | No update available                                                                                                                                                                                              |
| 50 | De Smet, D., et al. (2020). Vitamin D deficiency as risk factor for severe COVID-19: a convergence of two pandemics. <u>medRxiv</u> .<br><br><a href="https://www.medrxiv.org/content/10.1101/2020.05.01.20079376v2">https://www.medrxiv.org/content/10.1101/2020.05.01.20079376v2</a>                                                                                                                               | Not peer reviewed publication at time of narrative synthesis | No update available                                                                                                                                                                                              |
| 51 | Lau, F. H., et al. (2020). Vitamin D Insufficiency is Prevalent in Severe COVID-19. <u>medRxiv</u> .<br><br><a href="https://www.medrxiv.org/content/10.1101/2020.04.24.20075838v1?versioned=TRUE">https://www.medrxiv.org/content/10.1101/2020.04.24.20075838v1?versioned=TRUE</a>                                                                                                                                  | Not peer reviewed publication at time of narrative synthesis | No update available                                                                                                                                                                                              |
| 52 | Meltzer, D. O., et al. (2020). "Association of Vitamin D Deficiency and Treatment with COVID-19 Incidence." <u>MedRxiv : the Preprint Server for Health Sciences</u> <b>13</b> : 13.                                                                                                                                                                                                                                 | Not peer reviewed public                                     | An updated publication is available at <a href="https://jamanetwork.com/journals/jama-networkopen/fullarticle/2770157">https://jamanetwork.com/journals/jama-networkopen/fullarticle/2770157</a><br><br>Citation |

|    |                                                                                                                                                                                                                                                                                                                                                                                                                                                                                                     |                                                                     |                                                                                                                                                                                                                                                                                                                                                                                                                                                                                                                                                                                                                                                                                                                                                                                              |
|----|-----------------------------------------------------------------------------------------------------------------------------------------------------------------------------------------------------------------------------------------------------------------------------------------------------------------------------------------------------------------------------------------------------------------------------------------------------------------------------------------------------|---------------------------------------------------------------------|----------------------------------------------------------------------------------------------------------------------------------------------------------------------------------------------------------------------------------------------------------------------------------------------------------------------------------------------------------------------------------------------------------------------------------------------------------------------------------------------------------------------------------------------------------------------------------------------------------------------------------------------------------------------------------------------------------------------------------------------------------------------------------------------|
|    | <p><a href="https://www.medrxiv.org/content/10.1101/2020.05.08.20095893v1">https://www.medrxiv.org/content/10.1101/2020.05.08.20095893v1</a></p>                                                                                                                                                                                                                                                                                                                                                    | <p>ation at time of narrative synthesis</p>                         | <p>Meltzer DO, Best TJ, Zhang H, Vokes T, Arora V, Solway J. Association of Vitamin D Status and Other Clinical Characteristics With COVID-19 Test Results. <i>JAMA Netw Open</i>. 2020;3(9):e2019722. doi:10.1001/jamanetworkopen.2020.19722</p>                                                                                                                                                                                                                                                                                                                                                                                                                                                                                                                                            |
| 53 | <p>Notari, A. and G. Torrieri (2020). "COVID-19 transmission risk factors." <u>MedRxiv : the Preprint Server for Health Sciences</u>.</p> <p><a href="https://www.medrxiv.org/content/10.1101/2020.05.08.20095083v1?versioned=TRUE">https://www.medrxiv.org/content/10.1101/2020.05.08.20095083v1?versioned=TRUE</a></p>                                                                                                                                                                            | <p>Not peer reviewed publication at time of narrative synthesis</p> | <p>No update available</p>                                                                                                                                                                                                                                                                                                                                                                                                                                                                                                                                                                                                                                                                                                                                                                   |
| 54 | <p>Raisi-Estabragh, Z., et al. (2020). "Greater risk of severe COVID-19 in non-White ethnicities is not explained by cardiometabolic, socioeconomic, or behavioural factors, or by 25(OH)-vitamin D status: study of 1,326 cases from the UK Biobank." <u>MedRxiv : the Preprint Server for Health Sciences</u>.</p> <p><a href="https://www.medrxiv.org/content/10.1101/2020.06.01.20118943v1?versioned=TRUE">https://www.medrxiv.org/content/10.1101/2020.06.01.20118943v1?versioned=TRUE</a></p> | <p>Not peer reviewed publication at time of narrative synthesis</p> | <p>An updated publication is available at <a href="https://academic.oup.com/jpubhealth/article/42/3/451/5859581">https://academic.oup.com/jpubhealth/article/42/3/451/5859581</a></p> <p>Citation<br/>Zahra Raisi-Estabragh, Celeste McCracken, Mae S Bethell, Jackie Cooper, Cyrus Cooper, Mark J Caulfield, Patricia B Munroe, Nicholas C Harvey, Steffen E Petersen, Greater risk of severe COVID-19 in Black, Asian and Minority Ethnic populations is not explained by cardiometabolic, socioeconomic or behavioural factors, or by 25(OH)-vitamin D status: study of 1326 cases from the UK Biobank, <i>Journal of Public Health</i>, Volume 42, Issue 3, September 2020, Pages 451–460, <a href="https://doi.org/10.1093/pubmed/fda095">https://doi.org/10.1093/pubmed/fda095</a></p> |
| 55 | <p>Tan, C. W., et al. (2020). "A cohort study to evaluate the effect of combination Vitamin D, Magnesium and Vitamin B12 (DMB) on progression to severe outcome in older COVID-19 patients." <u>MedRxiv : the Preprint Server for Health Sciences</u>.</p> <p><a href="https://www.medrxiv.org/content/10.1101/2020.06.01.20112334v2">https://www.medrxiv.org/content/10.1101/2020.06.01.20112334v2</a></p>                                                                                         | <p>Not peer reviewed publication at time of narrative synthesis</p> | <p>No update available</p>                                                                                                                                                                                                                                                                                                                                                                                                                                                                                                                                                                                                                                                                                                                                                                   |



| Study details of the seven articles included at full text, but excluded at time of narrative synthesis |                                                                                           |                                                                                                                                                                                                                                                                                                                                                                                                                                                  |                                                                                                                                                                                      |                      |                                                                                                                                                                                                                                                                                                                                                                                                                                                                                                                                             |                                                                                                                                                                                                                        |
|--------------------------------------------------------------------------------------------------------|-------------------------------------------------------------------------------------------|--------------------------------------------------------------------------------------------------------------------------------------------------------------------------------------------------------------------------------------------------------------------------------------------------------------------------------------------------------------------------------------------------------------------------------------------------|--------------------------------------------------------------------------------------------------------------------------------------------------------------------------------------|----------------------|---------------------------------------------------------------------------------------------------------------------------------------------------------------------------------------------------------------------------------------------------------------------------------------------------------------------------------------------------------------------------------------------------------------------------------------------------------------------------------------------------------------------------------------------|------------------------------------------------------------------------------------------------------------------------------------------------------------------------------------------------------------------------|
| Study                                                                                                  | Design/<br>setting                                                                        | Population                                                                                                                                                                                                                                                                                                                                                                                                                                       | Exposure/Intervention                                                                                                                                                                | Outcomes             | Results                                                                                                                                                                                                                                                                                                                                                                                                                                                                                                                                     | Limitations                                                                                                                                                                                                            |
| Darling, A. L., et al. (2020) <sup>1</sup>                                                             | Retrospective cohort study<br><br>UK Biobank England cohort only                          | COVID-19 positive cases (n 580) Mean age 57.5 (SD 9.7)<br><br>COVID-19 negative controls (n 723) Mean age 57.9 (SD 8.7)                                                                                                                                                                                                                                                                                                                          | Serum 25(OH)D status Median (IQR) nmol/L<br><br>by gender (Male/Female), body mass index (Normal/underweight, overweight, obesity), ethnicity (Asian, Black, Mixed and Other, White) | COVID-19 test result | Serum 25(OH)D status similar in both groups:<br><br>COVID-19 positive cases (median IQR) = 43.3 (32.1) nmol/L)<br><br>COVID-19 negative controls (median (IQR) 44.1 (31.2) nmol/L) for COVID-19.<br><br>A logistic regression model suggests that being overweight (OR 1.51 CI 1.13-2.02) or obese (OR 1.67 CI 1.24-2.26); living in London (OR 1.45 CI 1.05-2.00); being male (OR 1.28 CI 1.01-1.61) and being of Asian, Black or Mixed ethnicity (OR 1.66 CI 1.08-2.54) is associated with a higher odds of testing positive for COVID-19 | UK Biobank baseline samples collected in 2006-2010.                                                                                                                                                                    |
| De Smet, D., et al. (2020) <sup>2</sup>                                                                | Retrospective observational study<br><br>Central network hospital, West Flanders, Belgium | 186 SARS-CoV-2 infected patients hospitalised from March 1, 2020 to April 7, 2020<br><br>(109 males [median age 68 years, IQR 53-79] 77 females [median age 71 years, IQR 65-74])<br><br>25(OH)D in COVID-19 patients was compared a control group of 2717 patients with similar age distribution, sampled from March 1, 2019 to April 30, 2019. (999 males [median age 69 years, IQR 53-81] and 1718 females [median age 68 years, IQR 43-83]). | 25(OH)D levels                                                                                                                                                                       | SARS-CoV-2 infection | COVID-19 patients had a lower median 25(OH)D on admission (18.6 ng/mL, IQR 12.6-25.3) than controls (21.5 ng/mL, IQR 13.9-20.8, P=0.0016) and a higher percentage of vitamin D deficiency (defined as 25(OH)D < 20ng/mL): 58.6% versus 45.2% (P=0.0005).<br><br>In male COVID-19 patients, vitamin D deficiency was lower median 25(OH)D (17.6 ng/mL, IQR 12.7-24.0 versus 20.3 ng/mL, IQR 13.7-28.3, P=0.0234) and a higher deficiency rate (67.0% versus 49.2%, P=0.0006) than male controls.                                             | The prevalence and age/sex/seasonal-distribution of vitamin D status was derived from the general population sampled from 16274 consecutive, unselected and unique patients from January 1, 2019 to December 31, 2019. |



|                                                  |                                                                                                                                           |                                                                                                                                                                                                                                                                                                                  |                                                                                                                                                                                                                                                                                                                                                                                                                                                                                                                                                  |                                      |                                                                                                                                                                                                                                                                                                                                                                                                                                                                                                                                                                                                                                                                                                                                                       |                                                                                                                                                                                                                                                                                       |
|--------------------------------------------------|-------------------------------------------------------------------------------------------------------------------------------------------|------------------------------------------------------------------------------------------------------------------------------------------------------------------------------------------------------------------------------------------------------------------------------------------------------------------|--------------------------------------------------------------------------------------------------------------------------------------------------------------------------------------------------------------------------------------------------------------------------------------------------------------------------------------------------------------------------------------------------------------------------------------------------------------------------------------------------------------------------------------------------|--------------------------------------|-------------------------------------------------------------------------------------------------------------------------------------------------------------------------------------------------------------------------------------------------------------------------------------------------------------------------------------------------------------------------------------------------------------------------------------------------------------------------------------------------------------------------------------------------------------------------------------------------------------------------------------------------------------------------------------------------------------------------------------------------------|---------------------------------------------------------------------------------------------------------------------------------------------------------------------------------------------------------------------------------------------------------------------------------------|
| <p>Lau, F. H., et al. (2020)<sup>3</sup></p>     | <p>Retrospective observational study</p> <p>A single, tertiary care academic (university) medical centre, Louisiana, New Orleans, USA</p> | <p>COVID-19 ICU patients (n 13)<br/>Mean age 61.5 (SD 15.7)</p> <p>COVID-19 floor patients (n 7)<br/>Mean age 72.0 (SD 14.8)</p> <p>Medical records of COVID-19 patients between March 27, 2020 and April 21, 2020</p> <p>Vitamin D insufficiency (VDI) and COVID-19 metrics in ICU vs. floor patients</p>       | <p>VDI: defined as serum 25(OH) D &lt; 30 ng/mL</p> <p>Serum 25(OH) D status Mean (SD) ng/mL</p> <p>by gender (Male/Female), body mass index (Normal, obesity), race (African American), age (elderly&gt;65 years), hypertension</p>                                                                                                                                                                                                                                                                                                             | <p>COVID-19 metrics</p>              | <p>Overall, few significant differences were identified between ICU and floor patients: Lactate dehydrogenase was significantly higher among ICU patients (441.8 vs. 223.0, P=0.001). Also, body mass index was significantly higher among ICU patients (35.2 vs. 24.5, P=0.02).</p> <p>Among ICU subjects, 11 (84.6%) had VDI, vs. 4 (57.1%) of floor subjects. 100% of ICU patients less than 75 years old had VDI (n=11). Among these, 64.6% (n=7) had critically low 25(OH) D (&lt;20 ng/mL) and 3 had &lt;10 ng/mL.</p> <p>VDI is highly prevalent in dark-skinned people (82.1% of African Americans vs. 41.6% overall).</p> <p>Male/Female ratio was 1.24 and 1.44 for COVID-19 and VDI respectively.</p>                                      | <p>Statistical analysis was limited by the small number of subjects.</p>                                                                                                                                                                                                              |
| <p>Meltzer, D. O., et al. (2020)<sup>4</sup></p> | <p>Retrospective cohort study</p> <p>University of Chicago Medicine, USA</p>                                                              | <p>4,314 patients tested for COVID-19 from 3/3/2020 to 4/10/2020. Among these, 499 had a vitamin D level in the year before testing.</p> <p>COVID-19 positive cases with vitamin D deficient (n 178)<br/>Mean age 45.6</p> <p>COVID-19 positive cases with not vitamin D deficient (n 321)<br/>Mean age 50.7</p> | <p>Vitamin D deficiency: defined by the most recent 25(OH) D &lt;20ng/ml or 1,25-dihydroxycholecalciferol &lt;18pg/ml within 1 year before COVID-19 testing. Treatment: defined by the most recent vitamin D type and dose, and treatment changes between the time of the most recent vitamin D level and time of COVID-19 testing</p> <p>Vitamin D deficiency and treatment changes were combined to categorize vitamin D status at the time of COVID-19 testing as:<br/>1) Likely deficient (last-level-deficient/treatment-not-increased)</p> | <p>Testing positive for COVID-19</p> | <p>In multivariable analysis, testing positive for COVID-19 was associated with increasing age (RR (age&lt;50)=1.05, P&lt;0.021; RR (age≥50)=1.02, P&lt;0.064), non-white race (RR=2.54, P&lt;0.01) and being likely vitamin D deficient (deficient/treatment-not-increased: RR=1.77, P&lt;0.02) as compared to likely vitamin D sufficient (not-deficient/treatment-not-decreased), with predicted COVID-19 rates in the vitamin D deficient group of 21.6% (95%CI [14.0%-29.2%] ) vs 12.2% (95%CI [8.9%-15.4%]) in the vitamin D sufficient group.</p> <p>Vitamin D deficiency declined with increasing vitamin D dose (especially of vitamin D3). Vitamin D dose was not significantly associated with testing positive for COVID-19 (P=0.18).</p> | <p>The associations observed might not reflect causal effects of vitamin D deficiency on COVID-19. This is because vitamin D deficiency can reflect a range of chronic health conditions or behavioural factors which plausibly decrease the likelihood of treatment of vitamin D</p> |

|                                                      |                                                                                  |                                                                                                                                                                                                                                                                                                                                                 |                                                                                                                                                                                                                                                                                                                                                                                                                          |                                |                                                                                                                                                                                                                                                                                                                                                                                                                                                                                                                                                                                                                                                                                                                                                                                                                                                                                                                                                                                                                                                                                                                                                                                                                                                                                 |                                                                                                                                                                                                                                                                                                       |
|------------------------------------------------------|----------------------------------------------------------------------------------|-------------------------------------------------------------------------------------------------------------------------------------------------------------------------------------------------------------------------------------------------------------------------------------------------------------------------------------------------|--------------------------------------------------------------------------------------------------------------------------------------------------------------------------------------------------------------------------------------------------------------------------------------------------------------------------------------------------------------------------------------------------------------------------|--------------------------------|---------------------------------------------------------------------------------------------------------------------------------------------------------------------------------------------------------------------------------------------------------------------------------------------------------------------------------------------------------------------------------------------------------------------------------------------------------------------------------------------------------------------------------------------------------------------------------------------------------------------------------------------------------------------------------------------------------------------------------------------------------------------------------------------------------------------------------------------------------------------------------------------------------------------------------------------------------------------------------------------------------------------------------------------------------------------------------------------------------------------------------------------------------------------------------------------------------------------------------------------------------------------------------|-------------------------------------------------------------------------------------------------------------------------------------------------------------------------------------------------------------------------------------------------------------------------------------------------------|
|                                                      |                                                                                  |                                                                                                                                                                                                                                                                                                                                                 | <p>2)Likely sufficient (last-level-not-deficient/treatment-not-decreased)<br/>                 3)Uncertain deficiency (last-level-deficient/treatment-increased or last-level-not-deficient/treatment-decreased)</p> <p>by age (&lt;50, ≥50), gender (Male/Female), race (White, other than White), ethnicity (Hispanic, not Hispanic), body mass index, employee status, comorbidity indicators (e.g. hypertension)</p> |                                |                                                                                                                                                                                                                                                                                                                                                                                                                                                                                                                                                                                                                                                                                                                                                                                                                                                                                                                                                                                                                                                                                                                                                                                                                                                                                 | <p>deficiency and increase COVID-19 risk.</p>                                                                                                                                                                                                                                                         |
| <p>Notari, A. and G. Torrieri (2020)<sup>5</sup></p> | <p>Correlational study</p> <p>126 countries, Only 50 countries for vitamin D</p> | <p>The number of cases follows in its early stages an almost exponential expansion. A starting point in each country was chosen: the first day di with 30 cases and fitted for 12 days. Thus, capturing the early exponential growth.</p> <p>Countries with too small total population (less than 300 thousands inhabitants) were excluded.</p> | <p>They analysed risk factors correlated with the initial transmission growth rate of COVID-19</p> <p>Average annual level of serum Vitamin D and the seasonal level</p> <p>The seasonal level is defined as: the amount during March or during winter for northern hemisphere, or during summer for southern hemisphere or the annual level for countries with little seasonal variation.</p>                           | <p>Growth rate of COVID-19</p> | <p>They looked for linear correlations of the exponents with other variables, for a sample of 126 countries.</p> <p>They found a positive correlation, i.e. faster spread of COVID-19, with high confidence level with the following variables, with respective p-value: low Temperature (<math>4.10^{-7}</math>), high ratio of old vs. working-age people (<math>3.10^{-6}</math>), life expectancy (<math>8.10^{-6}</math>), number of international tourists (<math>1.10^{-5}</math>), earlier epidemic starting date di (<math>2.10^{-5}</math>), high level of physical contact in greeting habits (<math>6.10^{-5}</math>), lung cancer prevalence (<math>6.10^{-5}</math>), obesity in males (<math>1.10^{-4}</math>), share of population in urban areas (<math>2.10^{-4}</math>), cancer prevalence (<math>3.10^{-4}</math>), alcohol consumption (0.0019), daily smoking prevalence (0.0036), UV index (0.004, smaller sample, 73 countries), low Vitamin D serum levels (0.002-0.006, smaller sample, 50 countries). There is highly significant correlation also with blood type. Also, positive correlation with moderate CI (p-value of 0.02-0.03) with: CO2/SO emissions, type-1 diabetes in children, and low vaccination coverage for Tuberculosis (BCG).</p> | <p>The dataset for the annual vitamin D was built with the available literature, which is quite inhomogeneous.</p> <p>The dataset for the seasonal levels is more restricted. This is because the relative literature is less complete. So, for this the authors have included only 42 countries.</p> |

|                                                 |                                                                           |                                                                                                                                                                                                                                                                                |                                                                                                                                                                                                                                                                                                                                                                                                                                                                   |                                                                                                   |                                                                                                                                                                                                                                                                                                                                                                                                                                                                                                                                                                                                                                                    |                                                                                                                                                                                                                                                                                                            |
|-------------------------------------------------|---------------------------------------------------------------------------|--------------------------------------------------------------------------------------------------------------------------------------------------------------------------------------------------------------------------------------------------------------------------------|-------------------------------------------------------------------------------------------------------------------------------------------------------------------------------------------------------------------------------------------------------------------------------------------------------------------------------------------------------------------------------------------------------------------------------------------------------------------|---------------------------------------------------------------------------------------------------|----------------------------------------------------------------------------------------------------------------------------------------------------------------------------------------------------------------------------------------------------------------------------------------------------------------------------------------------------------------------------------------------------------------------------------------------------------------------------------------------------------------------------------------------------------------------------------------------------------------------------------------------------|------------------------------------------------------------------------------------------------------------------------------------------------------------------------------------------------------------------------------------------------------------------------------------------------------------|
|                                                 |                                                                           |                                                                                                                                                                                                                                                                                |                                                                                                                                                                                                                                                                                                                                                                                                                                                                   |                                                                                                   | Vitamin D is not highly correlated with UV index due to different food consumption in different countries.                                                                                                                                                                                                                                                                                                                                                                                                                                                                                                                                         |                                                                                                                                                                                                                                                                                                            |
| Raisi-Estabragh, Z., et al. (2020) <sup>6</sup> | Retrospective cohort study<br><br>UK Biobank                              | 4,510 UK participants tested for COVID-19.<br><br>Latest data release (29/05/2020) includes test results from 16/03/2020 to 18/05/2020.<br><br>COVID-19 positive cases (n 1,326) Mean age 68.11 (SD 9.23)<br><br>COVID-19 negative controls (n 3,184) Mean age 68.91 (SD 8.72) | Serum 25(OH) D levels nmol/L<br><br>Multivariate logistic regression models by age, gender (Male/Female), ethnicity (Caucasian (any White background) and non-Caucasian: Black, Asian, Chinese) to test whether addition of: 1) cardio metabolic factors (e.g. hypertension, body mass index); 2) 25(OH)-vitamin D; 3) poor diet; 4) Townsend deprivation score; 5) housing; or 6) behavioural factors attenuated sex/ethnicity associations with COVID-19 status | COVID-19 test result<br><br>Greater risk of severe COVID-19                                       | Over-representation of men and non-White ethnicities in the COVID-19 positive group.<br><br>Non-Whites had, on average, poorer cardio metabolic profile, lower 25(OH)-vitamin D, greater material deprivation, and were more likely to live in larger households and flats.<br><br>Male sex, non-White ethnicity, higher body mass index, Townsend deprivation score, and household overcrowding were independently associated with significantly greater odds of COVID-19. The pattern of association was consistent for men and women; cardio metabolic, socio-demographic and behavioural factors did not attenuate sex/ethnicity associations. | UK Biobank baseline samples collected in 2006-2010.<br><br>Aggregating all Black and Minority Ethnic (BAME) populations into one cohort might overlook important differences between non-Caucasian ethnicities.<br><br>The current dataset does not allow assessment of specific COVID-19 health outcomes. |
| Tan, C. W., et al. (2020) <sup>7</sup>          | Cohort observational study<br><br>A tertiary academic hospital, Singapore | All 43 consecutive hospitalized COVID-19 patients aged 50 and above.<br><br>Between 15 January and 15 April 2020.                                                                                                                                                              | DMB = a single daily oral dose of vitamin D3 1000 IU, magnesium 150mg and vitamin B12 500mcg for up to 14 days<br><br>Adjusted for age, gender and comorbidities                                                                                                                                                                                                                                                                                                  | Deterioration post-DMB administration leading to any form of oxygen therapy and/or intensive care | Duration of therapy: days, Median 5 (IQR 4-7)<br><br>Significantly fewer DMB patients than controls required initiation of oxygen therapy subsequently throughout their hospitalization (17.6% vs 61.5%, P=0.006).<br><br>On univariate analysis, increasing age and presence of comorbidities were associated                                                                                                                                                                                                                                                                                                                                     | Small sample size, and the lack of systematic biologic measures to support their findings.                                                                                                                                                                                                                 |

|  |  |                                                                                                                                                |  |                                      |                                                                                                                                                                                                                                                                                                                                                                                                                 |  |
|--|--|------------------------------------------------------------------------------------------------------------------------------------------------|--|--------------------------------------|-----------------------------------------------------------------------------------------------------------------------------------------------------------------------------------------------------------------------------------------------------------------------------------------------------------------------------------------------------------------------------------------------------------------|--|
|  |  | <p>17 patients received Vitamin D, Magnesium, Vitamin B12 (DMB): Mean age 58.4 (SD 7.0)</p> <p>26 patients did not: Mean age 64.1 (SD 7.9)</p> |  | <p>support for COVID-19 patients</p> | <p>with significantly higher OR for oxygen therapy, while exposure to DMB therapy was associated with a significantly improved OR 0.13 (95% CI: 0.03 – 0.59, P=0.008) .</p> <p>On multivariate analysis, increasing age was associated with significantly higher OR for oxygen therapy, while exposure to DMB therapy was associated with a significantly improved OR 0.15 (95% CI: 0.025 – 0.93, P=0.041).</p> |  |
|--|--|------------------------------------------------------------------------------------------------------------------------------------------------|--|--------------------------------------|-----------------------------------------------------------------------------------------------------------------------------------------------------------------------------------------------------------------------------------------------------------------------------------------------------------------------------------------------------------------------------------------------------------------|--|

For peer review only

1  
2  
3  
4  
5  
6  
7  
8  
9  
10  
11  
12  
13  
14  
15  
16  
17  
18  
19  
20  
21  
22  
23  
24  
25  
26  
27  
28  
29  
30  
31  
32  
33  
34  
35  
36  
37  
38  
39  
40  
41  
42  
43  
44  
45  
46

## 5. Risk of bias of included studies

### Risk of bias assessment using the Downs and Black Checklist<sup>8</sup>

| Study                              | Quality score                                                                                                                                                                 | Reviewer notes                                                                                                                                                                                                                                                                                                                                                                                                                                                                                                                                                                                                                                                                                                                                                                                                                                                                                                         |
|------------------------------------|-------------------------------------------------------------------------------------------------------------------------------------------------------------------------------|------------------------------------------------------------------------------------------------------------------------------------------------------------------------------------------------------------------------------------------------------------------------------------------------------------------------------------------------------------------------------------------------------------------------------------------------------------------------------------------------------------------------------------------------------------------------------------------------------------------------------------------------------------------------------------------------------------------------------------------------------------------------------------------------------------------------------------------------------------------------------------------------------------------------|
| Hastie et al., 2020 <sup>9</sup>   | 14/20<br><br>Seven domains were not applicable and therefore not assessed, 2 reporting, 1 external validity 3 internal validity (bias) and 1 internal validity (confounding). | <p>The study could not be scored for 3 questions as we were unable to determine; 1) the representativeness of the subjects who were prepared to participate from entire population from which they were recruited, 2) whether losses to follow-up were taken into account as patients lost to follow-up were not reported and 3) whether the study had sufficient power to detect a clinically important effect.</p> <p>The study did not score a point for 3 questions; 1) providing the number and a description of the characteristics of patients lost to follow-up, 2) stating whether study subjects in different intervention groups we recruited over the same period of time and 3) for assignment concealment as it was a non-randomised study. The study scored partially (only 1 point not two) for clearly described distributions of principal confounders in each group of subjects to be compared.</p> |
| D'Avolio et al, 2020 <sup>10</sup> | 13/15<br><br>Twelve domains were not applicable therefore not assessed, 3 reporting, 1 external validity, 4 internal validity (bias) and 4 internal validity (confounding).   | <p>The study could not be scored for the 'power' domain as we were unable to determine from the article whether the study had sufficient power to detect a clinically important effect where the probability value for a difference being due to chance is less than 5%.</p> <p>The study did not score 1 point in the 'external validity' domain as those subjects who were prepared to participate were not representative of the entire population from which they were recruited.</p>                                                                                                                                                                                                                                                                                                                                                                                                                              |
| Fasano et al., 2020 <sup>11</sup>  | 12/17<br><br>Ten domains were not applicable therefore not assessed, 3 reporting, 1 external validity, 4 internal validity (bias) and 2 internal validity (confounding).      | <p>The study could not be scored for 4 items, the 'power' domain and one question in the 'Internal validity - confounding (selection bias)' as the study did not specify the time period over which patients were recruited. It could also not be scored for 2 questions in the 'External validity domain', 1) the representativeness of the subjects asked to participate in the study compared to the entire population from which they were recruited and 2) the representativeness of those subjects who were prepared to participate compared to the entire population from which they were recruited.</p> <p>The study did not score 1 point as the effect of the main confounders was not investigated or confounding was demonstrated but no adjustment was made in the final analyses. The study scored two points for presentation of potential confounders.</p>                                             |

|                                                                                                                                                                                                                                                                                                                                                                                                                                       |                                                                                                                                                                                        |                                                                                                                                                                                                                                                                                                                                                                                                                                                                                                                                                                                                                                                                                                                                                                                                                                                                                                                                                                                                                                                                                                                                                                                                                                                                                                                                                                                                                                                                                                                                                                                                                                                                                 |
|---------------------------------------------------------------------------------------------------------------------------------------------------------------------------------------------------------------------------------------------------------------------------------------------------------------------------------------------------------------------------------------------------------------------------------------|----------------------------------------------------------------------------------------------------------------------------------------------------------------------------------------|---------------------------------------------------------------------------------------------------------------------------------------------------------------------------------------------------------------------------------------------------------------------------------------------------------------------------------------------------------------------------------------------------------------------------------------------------------------------------------------------------------------------------------------------------------------------------------------------------------------------------------------------------------------------------------------------------------------------------------------------------------------------------------------------------------------------------------------------------------------------------------------------------------------------------------------------------------------------------------------------------------------------------------------------------------------------------------------------------------------------------------------------------------------------------------------------------------------------------------------------------------------------------------------------------------------------------------------------------------------------------------------------------------------------------------------------------------------------------------------------------------------------------------------------------------------------------------------------------------------------------------------------------------------------------------|
| Ilie et al., 2020 <sup>12</sup>                                                                                                                                                                                                                                                                                                                                                                                                       | 4/20<br>Seven domains were not applicable and therefore not assessed, 1 reporting, 1 external validity, 3 internal validity (bias), 1 internal validity (confounding) and 1 for power. | <p>The study could not be scored for 9 questions. Two in the 'reporting' domain, 1) interventions of interest not clearly described, 2) the main findings of the study are not clearly described. Two 'External validity' questions 1) the representativeness of the subjects asked to participate in the study compared to the entire population from which they were recruited and 2) the representativeness of those subjects who were prepared to participate compared to the entire population from which they were recruited. Two 'Internal validity – bias' domain questions 1) all analyses that had not been planned at the outset of the study were not clearly indicated (results of the study based on "data dredging", were not made clear), and 2) it was not clear is the statistical techniques used were appropriate to the data. Three 'Internal validity - confounding (selection bias)' domain questions, 1) no information provided concerning the source of patients included in the study 2) does not specify the time period over which patients were recruited, and 3) the numbers of patients lost to follow-up are not reported.</p> <p>The study did not score 7 points for the following; 3 reporting issues 1) no description of the characteristics of participants included in the study 2) no description of the distributions of principal confounders in each group of subjects to be compared, and 3) no description of the characteristics of patients lost to follow-up. Two internal validity bias issues 1) differences in follow-up were ignored and 2) no evidence that the main measure used were accurate (valid and reliable).</p> |
| <p><b>Note:</b> For each included study, the maximum possible quality score was dependent on which domains could be assessed based on the study design. The higher the score assigned to a study, the lower the risk of bias. For example, Hastie et al. 2020<sup>9</sup> was assigned a score of 14 out of a maximum possible score of 20, suggesting good quality and therefore low risk of bias compared to the other studies.</p> |                                                                                                                                                                                        |                                                                                                                                                                                                                                                                                                                                                                                                                                                                                                                                                                                                                                                                                                                                                                                                                                                                                                                                                                                                                                                                                                                                                                                                                                                                                                                                                                                                                                                                                                                                                                                                                                                                                 |

## References

1. Darling AL, Ahmadi KR, Ward KA, et al. Vitamin D status, body mass index, ethnicity and COVID-19: initial analysis of the first-reported UK Biobank COVID-19 positive cases (n 580) compared with negative controls (n 723). *medRxiv* 2020. doi: 10.1101/2020.04.29.20084277
2. De Smet D, De Smet K, Herroelen P, Gryspeerdt S, Martens GA. Vitamin D deficiency as risk factor for severe COVID-19: a convergence of two pandemics. *medRxiv* 2020. doi: 10.1101/2020.05.01.20079376
3. Lau FH, Majumder R, Torabi R, et al. Vitamin D insufficiency is prevalent in severe COVID-19. *medRxiv* 2020. doi: 10.1101/2020.04.24.20075838

- 1
- 2
- 3
- 4 4. Meltzer DO, Best TJ, Zhang H, Vokes T, Arora V, Solway J. Association of vitamin D
- 5 deficiency and treatment with COVID-19 incidence. *medRxiv* 2020. doi:
- 6 10.1101/2020.05.08.20095893
- 7
- 8 5. Notari A, Torrieri G. COVID-19 transmission risk factors. *medRxiv* 2020. doi:
- 9 10.1101/2020.05.08.20095083
- 10
- 11 6. Raisi-Estabragh Z, McCracken C, Bethell MS, et al. Greater risk of severe COVID-19 in non-
- 12 White ethnicities is not explained by cardiometabolic, socioeconomic, or behavioural
- 13 factors, or by 25(OH)-vitamin D status: study of 1,326 cases from the UK Biobank.
- 14 *medRxiv* 2020. doi: 10.1101/2020.06.01.20118943
- 15
- 16 7. Tan CW, Ho LP, Kalimuddin S, et al. A cohort study to evaluate the effect of combination
- 17 vitamin D, magnesium and vitamin B12 (DMB) on progression to severe outcome in
- 18 older COVID-19 patients. *medRxiv* 2020. doi: 10.1101/2020.06.01.20112334
- 19
- 20 8. Downs SH, Black N. The feasibility of creating a checklist for the assessment of the
- 21 methodological quality both of randomised and non-randomised studies of health
- 22 care interventions. *J Epidemiol Community Health* 1998;52(6):377-84. doi:
- 23 10.1136/jech.52.6.377
- 24
- 25 9. Hastie CE, Mackay DF, Ho F, et al. Vitamin D concentrations and COVID-19 infection in UK
- 26 Biobank. *Diabetes Metab Syndr* 2020;14(4):561-65. doi: 10.1016/j.dsx.2020.04.050
- 27
- 28 10. D'Avolio A, Avataneo V, Manca A, et al. 25-hydroxyvitamin D concentrations are lower in
- 29 patients with positive PCR for SARS-CoV-2. *Nutrients* 2020;12(5):1359. doi:
- 30 10.3390/nu12051359
- 31
- 32 11. Fasano A, Cereda E, Barichella M, et al. COVID-19 in Parkinson's Disease Patients Living
- 33 in Lombardy, Italy. *Mov Disord* 2020. doi: 10.1002/mds.28176
- 34
- 35 12. Ilie PC, Stefanescu S, Smith L. The role of vitamin D in the prevention of coronavirus
- 36 disease 2019 infection and mortality. *Aging Clin Exp Res* 2020. doi: 10.1007/s40520-
- 37 020-01570-8
- 38
- 39
- 40
- 41
- 42
- 43
- 44
- 45
- 46
- 47
- 48
- 49
- 50
- 51
- 52
- 53
- 54
- 55
- 56
- 57
- 58
- 59
- 60



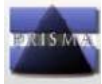

# PRISMA 2009 Checklist

| Section/topic                      | #  | Checklist item                                                                                                                                                                                                                                                                                              | Reported on page #    |
|------------------------------------|----|-------------------------------------------------------------------------------------------------------------------------------------------------------------------------------------------------------------------------------------------------------------------------------------------------------------|-----------------------|
| <b>TITLE</b>                       |    |                                                                                                                                                                                                                                                                                                             |                       |
| Title                              | 1  | Identify the report as a systematic review, meta-analysis, or both.                                                                                                                                                                                                                                         | 1                     |
| <b>ABSTRACT</b>                    |    |                                                                                                                                                                                                                                                                                                             |                       |
| Structured summary                 | 2  | Provide a structured summary including, as applicable: background; objectives; data sources; study eligibility criteria, participants, and interventions; study appraisal and synthesis methods; results; limitations; conclusions and implications of key findings; systematic review registration number. | 3                     |
| <b>INTRODUCTION</b>                |    |                                                                                                                                                                                                                                                                                                             |                       |
| Rationale                          | 3  | Describe the rationale for the review in the context of what is already known.                                                                                                                                                                                                                              | 5                     |
| Objectives                         | 4  | Provide an explicit statement of questions being addressed with reference to participants, interventions, comparisons, outcomes, and study design (PICOS).                                                                                                                                                  | 6                     |
| <b>METHODS</b>                     |    |                                                                                                                                                                                                                                                                                                             |                       |
| Protocol and registration          | 5  | Indicate if a review protocol exists, if and where it can be accessed (e.g., Web address), and, if available, provide registration information including registration number.                                                                                                                               | 6                     |
| Eligibility criteria               | 6  | Specify study characteristics (e.g., PICOS, length of follow-up) and report characteristics (e.g., years considered, language, publication status) used as criteria for eligibility, giving rationale.                                                                                                      | 7                     |
| Information sources                | 7  | Describe all information sources (e.g., databases with dates of coverage, contact with study authors to identify additional studies) in the search and date last searched.                                                                                                                                  | 6                     |
| Search                             | 8  | Present full electronic search strategy for at least one database, including any limits used, such that it could be repeated.                                                                                                                                                                               | Supp appendix 1       |
| Study selection                    | 9  | State the process for selecting studies (i.e., screening, eligibility, included in systematic review, and, if applicable, included in the meta-analysis).                                                                                                                                                   | 7 and supp appendix 2 |
| Data collection process            | 10 | Describe method of data extraction from reports (e.g., piloted forms, independently, in duplicate) and any processes for obtaining and confirming data from investigators.                                                                                                                                  | 8                     |
| Data items                         | 11 | List and define all variables for which data were sought (e.g., PICOS, funding sources) and any assumptions and simplifications made.                                                                                                                                                                       | 8                     |
| Risk of bias in individual studies | 12 | Describe methods used for assessing risk of bias of individual studies (including specification of whether this was done at the study or outcome level), and how this information is to be used in any data synthesis.                                                                                      | 8                     |



# PRISMA 2009 Checklist

Page 1 of 2

|                      |    |                                                                                                                                                           |   |
|----------------------|----|-----------------------------------------------------------------------------------------------------------------------------------------------------------|---|
| Summary measures     | 13 | State the principal summary measures (e.g., risk ratio, difference in means).                                                                             | 8 |
| Synthesis of results | 14 | Describe the methods of handling data and combining results of studies, if done, including measures of consistency (e.g., $I^2$ ) for each meta-analysis. | 8 |

| Section/topic                 | #  | Checklist item                                                                                                                                                                                           | Reported on page #                  |
|-------------------------------|----|----------------------------------------------------------------------------------------------------------------------------------------------------------------------------------------------------------|-------------------------------------|
| Risk of bias across studies   | 15 | Specify any assessment of risk of bias that may affect the cumulative evidence (e.g., publication bias, selective reporting within studies).                                                             | n/a                                 |
| Additional analyses           | 16 | Describe methods of additional analyses (e.g., sensitivity or subgroup analyses, meta-regression), if done, indicating which were pre-specified.                                                         | 8                                   |
| <b>RESULTS</b>                |    |                                                                                                                                                                                                          |                                     |
| Study selection               | 17 | Give numbers of studies screened, assessed for eligibility, and included in the review, with reasons for exclusions at each stage, ideally with a flow diagram.                                          | 8                                   |
| Study characteristics         | 18 | For each study, present characteristics for which data were extracted (e.g., study size, PICOS, follow-up period) and provide the citations.                                                             | 8 and<br>supp<br>appendix<br>3      |
| Risk of bias within studies   | 19 | Present data on risk of bias of each study and, if available, any outcome level assessment (see item 12).                                                                                                | 8/9 supp<br>appendix<br>4           |
| Results of individual studies | 20 | For all outcomes considered (benefits or harms), present, for each study: (a) simple summary data for each intervention group (b) effect estimates and confidence intervals, ideally with a forest plot. | 8/9/10<br>and supp<br>appendix<br>3 |
| Synthesis of results          | 21 | Present results of each meta-analysis done, including confidence intervals and measures of consistency.                                                                                                  | n/a                                 |
| Risk of bias across studies   | 22 | Present results of any assessment of risk of bias across studies (see Item 15).                                                                                                                          | n/a                                 |
| Additional analysis           | 23 | Give results of additional analyses, if done (e.g., sensitivity or subgroup analyses, meta-regression [see Item 16]).                                                                                    | 10                                  |
| <b>DISCUSSION</b>             |    |                                                                                                                                                                                                          |                                     |
| Summary of evidence           | 24 | Summarize the main findings including the strength of evidence for each main outcome; consider their relevance to key groups (e.g., healthcare providers, users, and policy makers).                     | 11/12/13                            |
| Limitations                   | 25 | Discuss limitations at study and outcome level (e.g., risk of bias), and at review-level (e.g., incomplete retrieval of identified research, reporting bias).                                            | 13                                  |

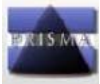

# PRISMA 2009 Checklist

1  
2  
3  
4  
5  
6  
7  
8  
9  
10  
11  
12  
13  
14  
15  
16  
17  
18  
19  
20  
21  
22  
23  
24  
25  
26  
27  
28  
29  
30  
31  
32  
33  
34  
35  
36  
37  
38  
39  
40  
41  
42  
43  
44  
45  
46  
47

|                |    |                                                                                                                                            |       |
|----------------|----|--------------------------------------------------------------------------------------------------------------------------------------------|-------|
| Conclusions    | 26 | Provide a general interpretation of the results in the context of other evidence, and implications for future research.                    | 13/14 |
| <b>FUNDING</b> |    |                                                                                                                                            |       |
| Funding        | 27 | Describe sources of funding for the systematic review and other support (e.g., supply of data); role of funders for the systematic review. | 15    |

From: Moher D, Liberati A, Tetzlaff J, Altman DG, The PRISMA Group (2009). Preferred Reporting Items for Systematic Reviews and Meta-Analyses: The PRISMA Statement. PLoS Med 6(7): e1000097. doi:10.1371/journal.pmed1000097

For more information, visit: [www.prisma-statement.org](http://www.prisma-statement.org).

Page 2 of 2

# BMJ Open

## Association between vitamin D supplementation or level and susceptibility to COVID-19 infection including clinical course, morbidity and mortality outcomes? A systematic review.

|                                 |                                                                                                                                                                                                                                                                                                                                                                                                                                                                                                                                                                                                                                                                                                                                                                                                                                                                                                                                                                                        |
|---------------------------------|----------------------------------------------------------------------------------------------------------------------------------------------------------------------------------------------------------------------------------------------------------------------------------------------------------------------------------------------------------------------------------------------------------------------------------------------------------------------------------------------------------------------------------------------------------------------------------------------------------------------------------------------------------------------------------------------------------------------------------------------------------------------------------------------------------------------------------------------------------------------------------------------------------------------------------------------------------------------------------------|
| Journal:                        | <i>BMJ Open</i>                                                                                                                                                                                                                                                                                                                                                                                                                                                                                                                                                                                                                                                                                                                                                                                                                                                                                                                                                                        |
| Manuscript ID                   | bmjopen-2020-043737.R2                                                                                                                                                                                                                                                                                                                                                                                                                                                                                                                                                                                                                                                                                                                                                                                                                                                                                                                                                                 |
| Article Type:                   | Original research                                                                                                                                                                                                                                                                                                                                                                                                                                                                                                                                                                                                                                                                                                                                                                                                                                                                                                                                                                      |
| Date Submitted by the Author:   | 09-Jan-2021                                                                                                                                                                                                                                                                                                                                                                                                                                                                                                                                                                                                                                                                                                                                                                                                                                                                                                                                                                            |
| Complete List of Authors:       | Grove, Amy; Warwick Life Sciences, Division of Health Sciences, Warwick Medical School<br>Osokogu, Osemeke; University of Warwick, Warwick Medical School<br>Al-Khudairy, Lena; University of Warwick Warwick Medical School, Population, evidence and technology<br>Mehrabian, Amin; University of Warwick, Warwick Medical School; University of Medical Sciences, 2) Department of Pharmaceutical Nanotechnology<br>Zanganeh, Mandana; University of Warwick, Warwick Medical School<br>Brown, Anna; University of Warwick, Warwick Medical School<br>Court, Rachel; University of Warwick, Health Sciences<br>Taylor-Phillips, Sian; University of Warwick, Warwick Medical School<br>Uthman, Olalekan; University of Warwick, Warwick-Centre for Applied Health Research (WCAHRD)<br>McCarthy, Noel; University of Warwick, Warwick Medical School<br>Kumar, Sudhesh; University of Warwick, Medical School<br>Clarke, Aileen; University of Warwick, Division of Health Sciences |
| <b>Primary Subject Heading</b>: | Public health                                                                                                                                                                                                                                                                                                                                                                                                                                                                                                                                                                                                                                                                                                                                                                                                                                                                                                                                                                          |
| Secondary Subject Heading:      | Infectious diseases                                                                                                                                                                                                                                                                                                                                                                                                                                                                                                                                                                                                                                                                                                                                                                                                                                                                                                                                                                    |
| Keywords:                       | COVID-19, Public health < INFECTIOUS DISEASES, NUTRITION & DIETETICS                                                                                                                                                                                                                                                                                                                                                                                                                                                                                                                                                                                                                                                                                                                                                                                                                                                                                                                   |
|                                 |                                                                                                                                                                                                                                                                                                                                                                                                                                                                                                                                                                                                                                                                                                                                                                                                                                                                                                                                                                                        |

SCHOLARONE™  
Manuscripts



I, the Submitting Author has the right to grant and does grant on behalf of all authors of the Work (as defined in the below author licence), an exclusive licence and/or a non-exclusive licence for contributions from authors who are: i) UK Crown employees; ii) where BMJ has agreed a CC-BY licence shall apply, and/or iii) in accordance with the terms applicable for US Federal Government officers or employees acting as part of their official duties; on a worldwide, perpetual, irrevocable, royalty-free basis to BMJ Publishing Group Ltd ("BMJ") its licensees and where the relevant Journal is co-owned by BMJ to the co-owners of the Journal, to publish the Work in this journal and any other BMJ products and to exploit all rights, as set out in our [licence](#).

The Submitting Author accepts and understands that any supply made under these terms is made by BMJ to the Submitting Author unless you are acting as an employee on behalf of your employer or a postgraduate student of an affiliated institution which is paying any applicable article publishing charge ("APC") for Open Access articles. Where the Submitting Author wishes to make the Work available on an Open Access basis (and intends to pay the relevant APC), the terms of reuse of such Open Access shall be governed by a Creative Commons licence – details of these licences and which [Creative Commons](#) licence will apply to this Work are set out in our licence referred to above.

Other than as permitted in any relevant BMJ Author's Self Archiving Policies, I confirm this Work has not been accepted for publication elsewhere, is not being considered for publication elsewhere and does not duplicate material already published. I confirm all authors consent to publication of this Work and authorise the granting of this licence.

1  
2  
3 Title page  
4  
5

6 **Title**  
7

8  
9 Association between vitamin D supplementation or level and susceptibility to COVID-19  
10 infection including clinical course, morbidity and mortality outcomes? A systematic review.  
11  
12

13 **Author's names**  
14

15  
16 Amy Grove (0000-0002-8027-7274), Osemeke Osokogu, Lena Al-Khudairy, Amin Mehrabian,  
17 Mandana Zanganeh, Anna Brown, Rachel Court, Sian Taylor-Phillips, Olalekan Uthman, Noel  
18 McCarthy, Sudhesh Kumar, Aileen Clarke (0000-0001-8299-3146).<sup>1</sup>  
19  
20

21 **Address for each author**  
22

23 **Author's names and positions**  
24

25  
26 1) Warwick Medical School, University of Warwick, Coventry, CV4 7AL, UK  
27

28 Dr Amy Grove

29 Associate Professor of Health Technology Assessment and Implementation Science  
30  
31

32 Dr Osemeke Osokogu

33 Research Fellow  
34  
35

36 Dr Lena Al-Khudairy

37 Senior Research Fellow  
38  
39

40 Dr Mandana Zanganeh

41 Research Fellow  
42  
43

44 Mrs Anna Brown

45 Information Specialist  
46  
47

48 Mrs Rachel Court

49 Information Specialist  
50  
51

52 Professor Sian Taylor-Phillips

53 Professor of Population Health  
54  
55

56 Professor Olalekan Uthman

57 Professor of Evidence Synthesis  
58  
59  
60

1  
2  
3 Professor Noel McCarthy  
4 Professor of Public Health  
5

6  
7 Professor Sudhesh Kumar  
8 Dean of Medicine  
9

10  
11 Professor Aileen Clarke  
12 Professor of Public Health and Health Services Research  
13  
14

15  
16 2) Department of Pharmaceutical Nanotechnology, School of Pharmacy, Mashhad  
17 University of Medical Sciences, Mashhad, Iran  
18

19  
20 Mr Amin Mehrabian  
21 Research Fellow  
22

23  
24 **Corresponding Author**  
25

26  
27 Dr Amy Grove, Room A101, Division of Health Sciences, Warwick Medical School, University  
28 of Warwick, Coventry, CV4 7AL  
29 Email: A.L.Grove@warwick.ac.uk  
30  
31  
32  
33  
34  
35  
36  
37  
38  
39  
40  
41  
42  
43  
44  
45  
46  
47  
48  
49  
50  
51  
52  
53  
54  
55  
56  
57  
58  
59  
60



## Abstract

Objective: To systemically review and critically appraise published studies of the association between vitamin D supplementation or level and susceptibility to COVID-19 infection, including clinical course, morbidity and mortality outcomes.

Design: Systematic review.

Data sources: MEDLINE (OVID), Embase (OVID), Cochrane Central Register of Controlled Trials, MedRxiv and BioRxiv preprint databases. COVID-19 databases of the WHO, Cochrane, CEBM Oxford, and Bern University up to 10 June 2020.

Study selection: Studies which assessed Vitamin D supplementation and/or Low Serum Vitamin D in patients acutely ill with, or at risk of severe betacoronavirus infection (SARS-CoV, MERS-CoV, SARS-CoV-2).

Data extraction: Two authors independently extracted data using a predefined data extraction form and assessed risk of bias using the Downs and Black Quality Assessment Checklist.

Results: Searches elicited 449 papers, 59 studies were eligible full text assessment and four met the eligibility criteria of this review. The four studies were narratively synthesised and included: 1) a cross-sectional study (n=107) suggesting an inverse association between serum vitamin D and SARS-CoV-2, 2) a retrospective cohort study (348,598 participants, 449 cases) in which univariable analysis showed that vitamin D protects against COVID-19, 3) an ecological country level study demonstrating a negative correlation between vitamin D and COVID-19 case numbers and mortality, and 4) a case-control survey (n=1,486) showing cases with confirmed/probable COVID-19 reported lower vitamin D supplementation. All studies were at high/unclear risk of bias.

Conclusion: There is no robust evidence of a negative association between vitamin D and COVID-19 infection. No relevant randomised control trials were identified and there is no robust peer reviewed published evidence of association between Vitamin D levels and severity of symptoms or mortality due to COVID-19. Guideline producers should acknowledge that benefits of vitamin D supplementation in COVID-19 infection are as yet unproven despite increasing interest from the media and academic community.

### Strengths and limitations of this study

- The strengths of this systematic review include that it is reported in accordance with the Preferred Reporting Items for Systematic Reviews and Meta-Analyses (PRISMA) checklist.
- The review was conducted by two independent reviewers to ensure robustness of this work.
- We searched multiple living systematic review databases to enable us to capture publications in a fast moving field of research.
- The limitations of the study relate to the small amount of evidence available which was, at risk of bias and which limits the inferences that can be drawn.
- The review was restricted to the English language, therefore non English language papers may have been missed.

## Introduction

COVID-19, a novel viral infection caused by Severe Acute Respiratory Syndrome Coronavirus two (SARS-CoV-2) was declared a pandemic by The World Health Organization (WHO) on 11 March 2020.<sup>1</sup> Mild COVID-19 infection may manifest as high temperature, a continuous cough and a loss of or change in sense of smell or taste.<sup>2,3</sup> However, more severe and critical cases can result in inflammation of the lungs, low oxygen levels and acute respiratory distress syndrome.<sup>4</sup> Interest is mounting regarding the association of vitamin D supplementation or level with susceptibility to COVID-19 infection due to the recognised modulating effects of vitamin D on the immune system and immune response.

Vitamin D can modulate the immune system through highly expressed receptors in most non-skeletal tissues.<sup>5,6</sup> Two of the most common analogues of vitamin D which are found in food and used as a dietary supplement are D<sub>2</sub> (ergocalciferol) and D<sub>3</sub> (cholecalciferol, also made by the skin when exposed to sunlight).<sup>7</sup> Both D<sub>2</sub> and D<sub>3</sub> can be hydroxylated by liver enzymes CYP2R1 and CYP27A1 to form calcidiol (25(OH)D). The active metabolite of vitamin D, calcitriol (1 $\alpha$ ,25(OH)<sub>2</sub>D), results from the action of CYP27B enzyme on calcidiol. CYP27B is found in several tissues including the kidney, skin, bones, and immune system.<sup>8,9</sup> Tumour necrosis factor  $\alpha$  (TNF  $\alpha$ ) and interferon (IFN $\gamma$ ) are examples of inflammatory cytokines that stimulate the CYP27B enzymes of the immune system.<sup>10-20</sup> Vitamin D can interact with both the innate and cellular immune systems through these mechanisms.

Current Public Health England (PHE),<sup>21</sup> National Institutes of Health<sup>22</sup> and European Food Safety Authority<sup>23</sup> recommendations highlight the importance of vitamin D to population health. Vitamin D deficiency is defined as less than 25 nmol/L (10ng/ml) measured in blood serum.<sup>21</sup> UK guideline recommendations suggest that people take a supplement of 10 micrograms of vitamin D per day during the winter months or throughout the year if they do not spend time outdoors or if they cover the majority of their skin when outside.<sup>21</sup> Published editorials, journal commentaries<sup>24-29</sup> and news media reports<sup>30-32</sup> suggest that individuals with low blood serum concentrations of vitamin D might be at higher risk of infection with COVID-19, or upon infection have worse outcomes than individuals with normal/high serum vitamin D.<sup>33</sup>

Several observational studies have reported associations between low serum vitamin D and chronic<sup>34</sup> and acute conditions such as susceptibility to acute respiratory tract infections (RTI).<sup>35-37</sup> Most recently, Martineau and colleagues (2017) conducted a systematic review and meta-analysis of individual participant data from randomised controlled trials (RCTs) to assess the overall effect of vitamin D supplementation on risk of acute RTI.<sup>38</sup> They reported vitamin D supplementation to be safe while protecting against acute RTI overall (adjusted odds ratio 0.88, 95% confidence interval 0.81 to 0.96; P for heterogeneity <0.001). Patients very deficient in vitamin D benefited the most (adjusted odds ratio 0.75, 0.60 to 0.95; p for

1  
2  
3 interaction=0.006).<sup>38</sup> Critiques of this review have suggested that the findings should be  
4 interpreted as hypothesis generating only, as the results are heterogeneous and not  
5 sufficiently applicable to the general population.<sup>39</sup> Recent rapid reviews of vitamin D for  
6 treatment or prevention in COVID-19 reported no evidence that vitamin D deficiency  
7 predisposes to COVID-19, or that vitamin D supplementation is effective in prevention or  
8 treatment of COVID-19.<sup>40 41</sup> However, data sources included in the rapid review were  
9 limited.<sup>42</sup> Given the remaining uncertainty, it is timely to systematically review and critically  
10 appraise all peer reviewed published evidence to assess the association of vitamin D  
11 supplementation or level with susceptibility to COVID-19 infection including clinical course,  
12 morbidity and mortality outcomes.  
13  
14  
15  
16  
17  
18

## 19 **Methods**

### 20 Protocol registration

21  
22 The methods were prespecified in a protocol that was registered with the PROSPERO  
23 International Prospective Register of Systematic Reviews  
24 ([https://www.crd.york.ac.uk/prospero/display\\_record.php?ID=CRD42020182876](https://www.crd.york.ac.uk/prospero/display_record.php?ID=CRD42020182876)). Research  
25 ethics committee approval was not required for this study.  
26  
27  
28  
29

30 We undertook a systematic review to answer the following question: Is vitamin D  
31 supplementation or level associated with susceptibility to severe betacoronavirus infection  
32 (Severe Acute Respiratory Syndrome [SARS-CoV], Middle East Respiratory Syndrome  
33 [MERS-CoV], Severe Acute Respiratory Syndrome two [SARS-CoV-2]) including clinical course,  
34 morbidity and mortality outcomes?  
35  
36  
37

38 Our review was conceptualised and written in accordance with the PRISMA statement.<sup>43</sup>  
39  
40

### 41 Data sources and search

42 The search strategy was developed by the information specialists in collaboration with the  
43 research team and clinical advisors. We searched MEDLINE (OVID interface), Embase (OVID  
44 interface), Cochrane Central Register of Controlled Trials, MedRxiv and BioRxiv preprint  
45 databases on 6<sup>th</sup>-8<sup>th</sup> May 2020. We searched the global research on COVID-19 developed by  
46 the WHO,<sup>44</sup> CEBM Oxford,<sup>45</sup> and the living systematic review developed by Bern University<sup>46</sup>  
47 on 10 May 2020. We updated the database searches on 10<sup>th</sup> June 2020 to capture articles  
48 which may have been published since the initial search was conducted.  
49  
50  
51  
52

53 We searched additional resources including relevant systematic reviews (in MEDLINE [OVID  
54 interface], Embase [OVID interface] and Cochrane Database of Systematic Reviews, 19<sup>th</sup> May  
55 2020), relevant references and contacted experts for additional evidence. Our full search  
56 record is included in the supplementary information.  
57  
58  
59  
60

## Study eligibility

We developed pre-defined study eligibility criteria aligned to the research question (Table 1). We imposed a date restriction of January 2002, to capture all published articles since SARS-CoV was first discovered in Asia in February 2003.<sup>47</sup> We limited to English language only.

Table 1. Study eligibility criteria

| <i>Study eligibility criteria</i>                                                                                                                                                                                                                                                                                                                                                                                         |
|---------------------------------------------------------------------------------------------------------------------------------------------------------------------------------------------------------------------------------------------------------------------------------------------------------------------------------------------------------------------------------------------------------------------------|
| <p>P - Population</p> <ol style="list-style-type: none"> <li>1) Patients acutely ill with betacoronavirus infection [SARS-CoV, MERS-CoV, SARS-CoV-2]</li> <li>2) or at risk of acute illness with betacoronavirus infection</li> </ol>                                                                                                                                                                                    |
| <p>I - Intervention/exposure</p> <ol style="list-style-type: none"> <li>1) Vitamin D supplementation</li> <li>2) Low Serum vitamin D</li> </ol>                                                                                                                                                                                                                                                                           |
| <p>O - Outcomes</p> <ol style="list-style-type: none"> <li>1) Betacoronavirus infection (to include serological evidence of infection or clinically confirmed symptomatic infection);</li> <li>2) Severe betacoronavirus infection (to include patients admitted to hospital or admitted to intensive care); mortality due to betacoronavirus infection</li> <li>3) Mortality due to betacoronavirus infection</li> </ol> |
| <p>C – Comparators</p> <ol style="list-style-type: none"> <li>1) No vitamin D supplementation</li> <li>2) High or normal serum vitamin D</li> </ol>                                                                                                                                                                                                                                                                       |
| <p>S - Study design</p> <p>Peer reviewed publications of randomised controlled trials and non-randomised studies were eligible for inclusion; including, non randomised controlled trials, interrupted time series analyses, controlled before-and-after studies, cohort studies, ecological studies, case reports and case series.</p>                                                                                   |
| <p>Subgroups</p> <ol style="list-style-type: none"> <li>1. Ethnicity characteristics (White British, all other White, Mixed, Asian, Black, Other)</li> <li>2. Age characteristics (population by five-year age groups)</li> </ol>                                                                                                                                                                                         |

## Article selection

Following the article search, we systematically identified and removed any duplicate citations using EndNote X9 software. Using titles and abstracts, de-duplicated citations were screened by two independent reviewers (OO, MZ, AM, AG) and checked by a third (AC). All articles deemed ineligible were excluded at this stage. We identified and obtained all remaining articles for full text screening, which was performed independently by at least two reviewers against the pre-specified eligibility criteria (Table 1). Where disagreements regarding the inclusion of articles arose, a third reviewer (AC) was consulted to reach a final decision.

### Data extraction

Two reviewers independently (LAK, MZ, OO, AM) extracted data from eligible full-text papers using a prespecified data extraction form. The accuracy of all the data extraction was independently assessed by a third reviewer (AG). Where reported, we sought to extract data from each article relevant to the research question, including details of population, intervention/exposure, comparator, outcomes and any detail related to the two pre-specified subgroups: ethnicity characteristics and age characteristics. Disagreements between reviewers were resolved by discussion and agreement, or via consultation with a third reviewer (AC).

### Risk of bias

The included studies had observational study designs aimed at answering a specific question. Therefore, risk of bias of included full-text papers was assessed using the Downs and Black Quality Assessment Checklist.<sup>48</sup> Two reviewers (AM, MZ, OO) independently assessed the risk of bias of the included studies and the accuracy of the assessment was evaluated by a third reviewer (LAK).

### Data analysis

We anticipated that identified studies would be too heterogeneous to facilitate pooling of study data and planned a narrative synthesis. Nevertheless, we intended to consider pooling outcomes data in a meta-analysis using a random-effects model if appropriate.

### Patient and public involvement

Due to the rapid timeframe of this systematic review it was not possible for our research team to involve patients or the public in the design, conduct, or reporting of our study.

### Results

After searching databases, assessing the reference lists of 17 narrative reviews<sup>27 28 33 49-62</sup> and one additional article identified through consultation with clinical experts,<sup>38</sup> we identified 499 citations. Following removal of duplicates and screening of titles and abstracts, we retrieved 59 full-text papers of which four met the full eligibility criteria (see **Error! Reference source not found.**). The electronic supplement includes a list of reasons for excluding studies at full text review. Seven articles closely met the eligibility criteria but were excluded as they were not available as peer reviewed publications at the time of our narrative synthesis, details of these seven studies<sup>63-69</sup> is provided in the electronic supplement.

<Figure 1 approximatley here >

1  
2  
3  
4 The characteristics of the four included studies are presented in  
5  
6  
7  
8  
9  
10  
11  
12  
13  
14  
15  
16  
17  
18  
19  
20  
21  
22  
23  
24  
25  
26  
27  
28  
29  
30  
31  
32  
33  
34  
35  
36  
37  
38  
39  
40  
41  
42  
43  
44  
45  
46  
47  
48  
49  
50  
51  
52  
53  
54  
55  
56  
57  
58  
59  
60

For peer review only



1  
2  
3 Table 2. All four included studies were conducted in Europe and published in April or May  
4 2020. One study was based on data from UK residents exclusively,<sup>70</sup> another included data  
5 on residents in 20 European countries, including the UK.<sup>71</sup> The studies were observational  
6 design and no relevant RCT were identified or included in the review. All four studies were  
7 at high or unclear risk of bias and scored poorly across several domains of the Downs and  
8 Black Quality Assessment Checklist,<sup>48</sup> including external validity, internal validity and power.  
9 A prominent issue amongst the included studies was that the authors did not perform  
10 adequate multivariable adjustment to correct for confounding.<sup>72 73 74</sup> Ecological bias was  
11 present in Ilie et al., 2020<sup>71</sup> which may result from spatial and temporal scale differences  
12 between country level mean levels of vitamin D. However, several domains in each risk of  
13 bias assessment were not applicable or not reported and therefore, could not be scored  
14 using the Downs and Black Quality Assessment Checklist.<sup>48</sup> Detailed risk of bias scores are  
15 provided in the electronic supplement.  
16  
17  
18  
19  
20  
21  
22  
23  
24  
25  
26  
27  
28  
29  
30  
31  
32  
33  
34  
35  
36  
37  
38  
39  
40  
41  
42  
43  
44  
45  
46  
47  
48  
49  
50  
51  
52  
53  
54  
55  
56  
57  
58  
59  
60

Table 2. Characteristics of the four included studies

| Study                              | Design/Setting                                                                        | Population                                                   | Exposure/Intervention                                                                                                                                                      | Outcomes                                                         | Results                                                                                                                                                                                                                                                                                                                                                        | Limitations                                                                                                                                                                                                                                           |
|------------------------------------|---------------------------------------------------------------------------------------|--------------------------------------------------------------|----------------------------------------------------------------------------------------------------------------------------------------------------------------------------|------------------------------------------------------------------|----------------------------------------------------------------------------------------------------------------------------------------------------------------------------------------------------------------------------------------------------------------------------------------------------------------------------------------------------------------|-------------------------------------------------------------------------------------------------------------------------------------------------------------------------------------------------------------------------------------------------------|
| <b>Serum vitamin D</b>             |                                                                                       |                                                              |                                                                                                                                                                            |                                                                  |                                                                                                                                                                                                                                                                                                                                                                |                                                                                                                                                                                                                                                       |
| D'Avolio et al. 2020 <sup>73</sup> | Cross-sectional study<br>Canton of Tessin, Switzerland                                | 107 patients with data on SARS-CoV-2 and 25(OH)D measurement | Vitamin D analysis, conducted within seven weeks of the SARS-CoV-2 polymerase chain reaction (PCR) result<br><br>Control patients with 25(OH)D data during the same period | SARS-CoV-2 infection                                             | Group 1 comprised 27 patients with positive PCR test results for SARS-CoV-2 while group 2 comprised 80 patients with a negative PCR result for SARS-CoV-2<br><br>Significantly lower 25(OH)D levels (p = 0.004) in SARS-CoV-2 patients even after stratifying patients according to age >70 years                                                              | Few patients from a single hospital<br><br>No available clinical information about the severity of COVID-19 symptoms<br><br>No data on other potential confounding variable<br><br>SARS-CoV-2 and the 25(OH)D status were performed on different days |
| Hastie et al. 2020 <sup>70</sup>   | Retrospective cohort study<br>UK Biobank Cohort including England, Scotland and Wales | 502,624 participants aged 37-73 years between 2006 and 2010  | Biochemical assay of 25(OH)D, a measure of vitamin D status<br><br>Vitamin D was imputed if it was below or above the limit of detection                                   | Confirmed COVID-19 infection (at least one positive test result) | Complete data on 348,598 UK Biobank participants<br><br>449 had confirmed COVID-19 infection. Of these, 385 (85.8%) were White compared to 64 (14.2%) non-White (Black, South Asian and others)<br><br>Vitamin D was associated with COVID-19 infection univariably but not after adjustment for confounders. Ethnicity was associated with COVID-19 infection | UK Biobank is not representative of the general population<br><br>Baseline measurements, including 25(OH)D concentration and health status, were obtained a decade prior to conduct of the study                                                      |

1  
2  
3  
4  
5  
6  
7  
8  
9  
10  
11  
12  
13  
14  
15  
16  
17  
18  
19  
20  
21  
22  
23  
24  
25  
26  
27  
28  
29  
30  
31  
32  
33  
34  
35  
36  
37  
38  
39  
40  
41  
42  
43  
44  
45  
46

|                                  |                                                                        |                                                                                                            |                                          |                                                                                                                 |                                                                                                                                                           |                                                                                                                                                                                                                                                                             |
|----------------------------------|------------------------------------------------------------------------|------------------------------------------------------------------------------------------------------------|------------------------------------------|-----------------------------------------------------------------------------------------------------------------|-----------------------------------------------------------------------------------------------------------------------------------------------------------|-----------------------------------------------------------------------------------------------------------------------------------------------------------------------------------------------------------------------------------------------------------------------------|
| Ilie et al. 2020 <sup>71</sup>   | Ecological study<br>20 European countries                              | Population of 20 included European countries                                                               | Mean levels of vitamin D in each country | Cases of COVID-19 per 1 million population in each country<br><br>Deaths from COVID-19 per 1 million population | Negative correlations between mean levels of vitamin D and the number of COVID-19 cases per 1 million, and mortality per 1 million                        | The number of cases per country is affected by the number of tests performed and by the different measures taken by each country to prevent the spread of infection                                                                                                         |
| <b>Vitamin D supplementation</b> |                                                                        |                                                                                                            |                                          |                                                                                                                 |                                                                                                                                                           |                                                                                                                                                                                                                                                                             |
| Fasano et al. 2020 <sup>74</sup> | Case-control survey<br><br>A single tertiary centre in Lombardy, Italy | 1,486 Parkinson's disease (PD) patients were included in the survey<br><br>1,207 family members (controls) | Vitamin D                                | 'Confirmed' or 'probable' diagnosis of COVID-19                                                                 | 12.4% of PD patients with confirmed or probable COVID-19 had been taking vitamin D<br><br>22.9% of PD patients without COVID-19 had been taking vitamin D | Well-known limitation of a telephone survey<br><br>Community-dwelling PD patients<br><br>Some patients could not be reached possibly due to death from COVID-19<br><br>COVID-19 diagnosis could not be confirmed in many cases<br><br>Younger age of non- PD COVID-19 cases |

### Serum vitamin D

D'Avolio et al., 2020<sup>73</sup> used a cross sectional design with data on nasopharyngeal swab polymerase chain reaction (PCR) analysis for SARS-CoV-2 and a 25(OH)D measurement taken from patients between 1st March and 14th April 2020. PCR positives (median age = 74 years [IQR 65–81]; male = 70.4%) had significantly ( $P = 0.004$ ) lower serum 25(OH)D levels (median = 11.1 ng/mL [IQR 8.2–21.0]) than PCR negatives (median age = 73 years [IQR 61–82]; male = 48.8%; median 25(OH)D = 24.6 ng/mL [IQR 8.9–30.5]). Although gender and age stratified analysis showed no significant differences, older (>70 years) SARS-CoV-2 positive ( $n=18$ ) participants had significantly lower median serum 25 (OH) D levels (9.3 ng/mL [IQR 8.1–19.9]) than older SARS-CoV-2 negatives ( $n=43$ ) (23.1 ng/mL [IQR 8.5–31.7]) ( $P = 0.037$ ).

Hastie et al., 2020<sup>70</sup> is a retrospective cohort study that utilised data from the UK Biobank,<sup>72</sup> using data from 348,598 people with complete information on vitamin D and covariates; 449 people tested positive for COVID-19 infection. COVID-19 positives were older (Median = 49 years; Interquartile Range [IQR] = 40-58) than COVID-19 negatives (Median = 49 years; IQR = 38 - 57) with  $p$ -value of  $<0.05$ . Multivariable analysis showed that age at assessment (OR = 1.02; 95% CI = 1.00 - 1.03;  $P = 0.016$ ) and non-White ethnicity (Black OR = 4.30, 95% CI = 2.92 - 6.31,  $P = < 0.001$ ; South Asian OR = 2.42, 95% CI = 1.50 - 3.93,  $P = < 0.001$ ) were associated with confirmed COVID-19 infection. There was no significant interaction between ethnicity and vitamin D deficiency (OR = 0.90; 95% CI = 0.66 - 1.23;  $P = 0.515$ ). Median vitamin D concentration at recruitment was lower for people with subsequent confirmed COVID-19 infection (28.7 [IQR 10.0-43.8] nmol/l) than for other participants (32.7 [IQR 10.0-47.2] nmol/l) ( $P = < 0.01$ ). Although univariable analysis suggested an association between vitamin D and COVID-19 (OR=0.99; 95% CI 0.99 – 0.999;  $P=0.013$ ), this association became insignificant (OR=1.00; 95% CI = 0.998-1.01;  $P=0.208$ ) after adjustment for covariates.<sup>70</sup>

Ilie et al., 2020<sup>71</sup> used an ecological study design reporting on 20 European countries as at 8th April 2020; the data pertains to mean levels of vitamin D, cases of COVID-19 infection per million population and deaths from COVID-19 per million population. The authors performed Pearson Correlation Coefficient Calculations and reported a negative correlation between mean levels of vitamin D (Mean 56.79 nmol/l, SD 10.61) and numbers of cases of COVID-19 infection per million population in each country (Mean cases 1393.4, SD 1129.984,  $r(20) = -0.44$ ;  $P = 0.05$ ). Additionally, a negative correlation was reported between mean vitamin D levels and the number of deaths caused by COVID-19 per million population in each country (Mean 80.42, SD 94.61,  $r(20) = -0.4378$ ;  $P = 0.05$ ). Sweden had the highest mean level of vitamin D (73.5 nmol/l) compared to Spain which had a mean level of 42.5 nmol/l). The number of cases of COVID-19 per million population was 834 in Sweden and 3,137 in Spain. Likewise, at the time of the study, there were 68 deaths from COVID-19 per million population in Sweden and 314 in Spain.

### Vitamin D supplementation

Fasano et al., 2020<sup>74</sup> investigated patients in a case-control phone survey in Lombardy, Italy. COVID-19 diagnosis was confirmed using a nasopharyngeal swab or probable based on : a) presence of persistent COVID-19-related symptoms ( $\geq 3$  including fever or  $\geq 5$  without fever); or b)  $\geq 1$  symptom in presence of suggestive chest radiologic signs; and/or c) living with a family member with a confirmed diagnosis of COVID-19. 1,486 participants were included in the survey (32 confirmed COVID-19, 73 probable COVID-19 and 1,381 unaffected). Confirmed/probable COVID-19 cases (mean age = 70.5 [Standard Deviation [SD] = 10.1]; male = 53%) self-reported a significantly lower intake of vitamin D supplementation (12.4%) compared to unaffected cases (22.9%; mean age = 73.0 [SD = 9.5], male = 57%). The age-adjusted OR (OR 0.56 [95% CI = 0.32-0.99], P= 0.048) suggested a protective effect of vitamin D intake.

### Subgroup evaluation

We planned to perform subgroup analyses by age and ethnicity. According to Hastie et al., 2020<sup>70</sup> multivariable analysis showed that age at assessment (OR = 1.02; 95% CI = 1.00 - 1.03; P= 0.016) and non-White ethnicity (Black OR = 4.30, 95% CI = 2.92 - 6.31, P= < 0.001; South Asians OR = 2.42, 95% CI = 1.50 - 3.93, P= <0.001) were associated with confirmed COVID-19 infection. However, Hastie et al found no significant interaction between ethnicity and vitamin D deficiency (OR = 0.90; 95% CI = 0.66 - 1.23; P= 0.515).

### Discussion

This systematic review of non-randomised studies has shown no robust evidence of an association between vitamin D and COVID-19 infection. We identified four studies for inclusion in a narrative synthesis which were all at high or unclear risk of bias. A univariable analysis of data from the UK Biobank database revealed an association between vitamin D and COVID-19 infection (OR=0.99; 95% CI 0.99 – 0.999; P=0.013). However, this association became insignificant (OR=1.00; 95% CI=0.998-1.01; P=0.208) after adjustment for 13 other covariates, suggesting that the initial association was due to one or more confounding variables.<sup>70</sup> This view is further strengthened by the demonstration of highly significant associations between age and ethnicity characteristics as predictor variables, and COVID-19 infection as the outcome variable. Overall, the UK Biobank study showed no effect, however it should be noted that the UK Biobank data included only one measurement of Vitamin D levels taken between 10 and 14 years prior to the outbreak of COVID-19. This is a significant study limitation.

Liu et al., 2020<sup>75</sup> concluded that patients over 60 years experienced more severe manifestations and had longer disease courses of COVID-19 compared to patients below 60 years.<sup>75</sup> And other studies have shown that older (rather than younger) people are more likely to die from COVID-19 infection.<sup>76-79</sup>

1  
2  
3 Non-White people are known to be more susceptible to COVID-19 infection and tend to  
4 develop worse outcomes,<sup>80</sup> a finding that our review has further substantiated.<sup>70</sup> Ethnicity is  
5 a multi-faceted construct that includes genetic make-up, socio-cultural identity and  
6 behavioural patterns.<sup>81</sup> It has been shown to be associated with differing susceptibility and  
7 treatment outcomes in a number of diseases.<sup>82 83 84</sup> Hastie et al., 2020<sup>[#ref]</sup> did not find any  
8 interaction between ethnicity and vitamin D deficiency and although Ilie et al 2020<sup>71</sup>  
9 identified a relationship, the study is subject to ecological bias. Ilie et al 2020<sup>71</sup> compared  
10 vitamin D levels and rates of COVID-19 infection across 20 European countries, and therefore  
11 many relevant factors were not accounted for in the analysis. Given the findings so far from  
12 our review we consider that there is paucity of data on vitamin D levels and morbidity and  
13 mortality from COVID-19 and there is no evidence from RCTs on outcomes of vitamin D  
14 supplementation on severity of symptoms or mortality to date. However a relationship  
15 between ethnicity, vitamin D (serum levels or supplementation) and susceptibility to or  
16 severity of COVID-19 infection cannot yet be ruled out.

17  
18 Risk of bias assessments demonstrate that all studies were at high or unclear risk of bias. All  
19 studies were observational designs and therefore subject to confounding. The persistent calls  
20 for high-dose vitamin D supplementation<sup>85</sup> arise from speculation about presumed  
21 mechanisms.<sup>86 87</sup> Our systematic review found no robust evidence that low levels of Vitamin  
22 D are associated with an increased likelihood of COVID-19 infection. More robust prognostic  
23 studies could be combined in a systematic review where a prognostic factor research question  
24 is phrased, and considerations of participation, attrition, prognostic factor measurement,  
25 confounding measurement and account, outcome measurement, and analysis and reporting  
26 are evaluated.

27  
28 Our systematic review identified no relevant RCTs, nevertheless we are aware of two ongoing  
29 RCTs investigating the effects of vitamin D on COVID-19, the ZnD3-CoVici study, France  
30 (NCT04351490)<sup>88</sup> and the CoVitTrial, France (NCT04344041).<sup>89</sup> Both trials have an estimated  
31 study completion date of July 2020. Inclusion of data from these studies in future systematic  
32 reviews and meta-analyses may enable us to potentially draw better stronger conclusions on  
33 this topic. Results from the ongoing international VITDALIZE Study (NCT03188796) may also  
34 contribute to our understanding of the effect of high dose vitamin D3 on mortality.<sup>90</sup>

### 35 36 37 38 39 40 41 42 43 44 45 46 47 48 49 **Study limitations**

50  
51 We performed a full systematic review of the published evidence available, and simultaneous  
52 independent screening, data extraction and risk of bias assessments. However, our study is  
53 limited by the small amount of evidence available which was, moreover, at risk of bias. This  
54 limits the inferences that can be drawn. Seven eligible studies were excluded because they  
55 are not available as peer reviewed publications.<sup>63-69</sup> If published, these seven studies would  
56 be included in a future update of this review. A final limitation is that the review was restricted  
57  
58  
59  
60

1  
2  
3 to English language only. Therefore, articles published in other languages may have been  
4 excluded.  
5  
6

### 7 **Implications for practice**

8  
9 Our review does not provide evidence for or against additional or high dose vitamin D  
10 supplementation specifically in relation to COVID-19. Treatment as standard practice for  
11 people who are deficient is pre-existing practice across Europe<sup>23</sup> the US<sup>91</sup> and in the UK.<sup>21</sup>  
12 Current guidelines from PHE suggest that the entire UK population should take vitamin D  
13 supplements to prevent vitamin D deficiency in winter or with inadequate sunlight exposure  
14 to sun in summer.<sup>21</sup> This review does not give evidence to drive a change in this current  
15 advice. Treatment recommendations for patients should be updated following the  
16 publication of results from ongoing and new well designed adequately powered randomised  
17 controlled trials  
18  
19  
20  
21  
22

### 23 **Conclusion**

24 This systematic review identified no robust evidence to enable us to assess an association  
25 between vitamin D supplementation or level with susceptibility to COVID-19 infection  
26 including clinical course, morbidity and mortality outcomes. All studies were at high or  
27 unclear risk of bias. Both age and ethnicity were associated with vitamin D levels even after  
28 multivariable adjustment. Black and South Asian people had a much higher risk of confirmed  
29 COVID-19 compared to White people. However, there was no interaction between the  
30 association of ethnicity and vitamin D deficiency with COVID-19. There were no papers  
31 reporting association of vitamin D with severity of symptoms or mortality due to COVID-19.  
32  
33  
34  
35  
36  
37  
38  
39  
40  
41  
42  
43  
44  
45  
46  
47  
48  
49  
50  
51  
52  
53  
54  
55  
56  
57  
58  
59  
60



**Acknowledgements:**

We thank Mrs Kath Charters, Welsh Ambulance Services NHS Trust for comments on the study design and drafts of this manuscript and for valuable advice and helpful discussions.

**Contributorship statement:**

SK, AG and AC conceived the study. AG, AC, NMCC, SK, STP and OU designed the study. RC and AB developed the search strategies, performed all searches and database management and created the bibliography. AG, AC, AM, OO, MZ screened titles and abstracts for inclusion. AG, OO, AM, MZ, LAK, AC screened at full text and extracted and analysed data. OO, AM, MZ, LAK performed risk of bias assessments. AC, SK and NMCC assisted in the interpretation from a clinical perspective. STP, LAK, OU offered technical and methodological support. AG and OO wrote the first draft, all authors revised content. All authors approved the final manuscript. AG and AC are the guarantors. The corresponding author attests that all listed authors meet authorship criteria and that no others meeting the criteria have been omitted.

**Copyright/license for publication:**

The Corresponding Author has the right to grant on behalf of all authors and does grant on behalf of all authors, a worldwide licence to the Publishers and its licensees in perpetuity, in all forms, formats and media (whether known now or created in the future), to i) publish, reproduce, distribute, display and store the Contribution, ii) translate the Contribution into other languages, create adaptations, reprints, include within collections and create summaries, extracts and/or, abstracts of the Contribution, iii) create any other derivative work(s) based on the Contribution, iv) to exploit all subsidiary rights in the Contribution, v) the inclusion of electronic links from the Contribution to third party material where-ever it may be located; and, vi) licence any third party to do any or all of the above.

**Funding:**

Dr Amy Grove is supported by the National Institute for Health Research (NIHR) Advanced Fellowship Programme Reference (AF-300060). Dr Taylor-Phillips is supported by an NIHR Career Development Fellowship (CDF-2016-09-018). Prof Clarke and Dr Al-Khudairy are supported by the NIHR Applied Research Centre West Midlands (ARC-WM). All other authors, with the exception of Professor Uthman, Professor Kumar and Professor McCarthy, are supported by the NIHR, Evidence Synthesis Programme (HTA 14.25.05). The views expressed are those of the authors and not necessarily those of the NIHR or the Department of Health and Social Care.

**Competing interests:**

All authors have completed the ICMJE uniform disclosure form at [www.icmje.org/coi\\_disclosure.pdf](http://www.icmje.org/coi_disclosure.pdf) and declare: no support from any organisation for the submitted work; no competing interests with regards to the submitted work.



**Ethical statement:**

Not required

**Data sharing statement:**

The study protocol is available

Systematic review protocol registration: CRD42020182876 available online via PROSPERO at [https://www.crd.york.ac.uk/prospERO/display\\_record.php?ID=CRD42020182876](https://www.crd.york.ac.uk/prospERO/display_record.php?ID=CRD42020182876). All included studies are publicly available. Additional data are available upon reasonable request by emailing the corresponding author.

## References

1. World Health Organization. Coronavirus disease (COVID-19) pandemic. 2020. <https://www.who.int/emergencies/diseases/novel-coronavirus-2019>
2. NHS. Check if you or your child has coronavirus symptoms. 2020. <https://www.nhs.uk/conditions/coronavirus-covid-19/symptoms/#symptoms>
3. Argenziano MG, Bruce SL, Slater CL, et al. Characterization and clinical course of 1000 patients with coronavirus disease 2019 in New York: retrospective case series. *BMJ* 2020;369:m1996. doi: 10.1136/bmj.m1996
4. Matthay MA, Aldrich JM, Gotts JE. Treatment for severe acute respiratory distress syndrome from COVID-19. *Lancet Respir Med* 2020;8(5):433-34. doi: 10.1016/s2213-2600(20)30127-2
5. Gruber BM. Fenomen witaminy D [The phenomenon of vitamin D]. *Postepy Hig Med Dosw (Online)* 2015;69:127-39
6. Gruber-Bzura BM. Vitamin D and influenza: prevention or therapy? *Int J Mol Sci* 2018;19(8):2419. doi: 10.3390/ijms19082419
7. Holick MF. High prevalence of vitamin D inadequacy and implications for health. *Mayo Clin Proc* 2006;81(3):353-73. doi: 10.4065/81.3.353
8. Sigmundsdottir H, Pan J, Debes GF, et al. DCs metabolize sunlight-induced vitamin D3 to 'program' T cell attraction to the epidermal chemokine CCL27. *Nat Immunol* 2007;8(3):285-93. doi: 10.1038/ni1433
9. Kogawa M, Findlay DM, Anderson PH, et al. Osteoclastic metabolism of 25(OH)-vitamin D3: a potential mechanism for optimization of bone resorption. *Endocrinology* 2010;151(10):4613-25. doi: 10.1210/en.2010-0334
10. Jones G. Vitamin D safety: its mechanisms and application. *Standardy Medyczne, Pediatria* 2012;9:605-09
11. Kim D. The role of vitamin D in thyroid diseases. *Int J Mol Sci* 2017;18(9):1949. doi: 10.3390/ijms18091949
12. Beard JA, Bearden A, Striker R. Vitamin D and the anti-viral state. *J Clin Virol* 2011;50(3):194-200. doi: 10.1016/j.jcv.2010.12.006
13. Liu PT, Stenger S, Li H, et al. Toll-like receptor triggering of a vitamin D-mediated human antimicrobial response. *Science* 2006;311(5768):1770-3. doi: 10.1126/science.1123933
14. Adams JS, Ren S, Liu PT, et al. Vitamin D-directed rheostatic regulation of monocyte antibacterial responses. *J Immunol* 2009;182(7):4289-95. doi: 10.4049/jimmunol.0803736
15. Laaksi I. Vitamin D and respiratory infection in adults. *Proc Nutr Soc* 2012;71(1):90-7. doi: 10.1017/s0029665111003351
16. Sharifi A, Vahedi H, Nedjat S, Rafiei H, Hosseinzadeh-Attar MJ. Effect of single-dose injection of vitamin D on immune cytokines in ulcerative colitis patients: a randomized placebo-controlled trial. *APMIS* 2019;127(10):681-87. doi: 10.1111/apm.12982
17. Cantorna MT, Snyder L, Lin YD, Yang L. Vitamin D and 1,25(OH)<sub>2</sub>D regulation of T cells. *Nutrients* 2015;7(4):3011-21. doi: 10.3390/nu7043011
18. Jeffery LE, Burke F, Mura M, et al. 1,25-Dihydroxyvitamin D3 and IL-2 combine to inhibit T cell production of inflammatory cytokines and promote development of regulatory

- 1  
2  
3 T cells expressing CTLA-4 and FoxP3. *J Immunol* 2009;183(9):5458-67. doi:  
4 10.4049/jimmunol.0803217  
5  
6 19. Lei GS, Zhang C, Cheng BH, Lee CH. Mechanisms of action of vitamin D as supplemental  
7 therapy for pneumocystis pneumonia. *Antimicrob Agents Chemother*  
8 2017;61(10):e01226-17. doi: 10.1128/aac.01226-17  
9  
10 20. Colunga Biancatelli RML, Berrill M, Marik PE. The antiviral properties of vitamin C. *Expert*  
11 *Rev Anti Infect Ther* 2020;18(2):99-101. doi: 10.1080/14787210.2020.1706483  
12  
13 21. Scientific Advisory Committee on Nutrition. SACN vitamin D and health report. 21 July  
14 2016. [https://www.gov.uk/government/publications/sacn-vitamin-d-and-health-](https://www.gov.uk/government/publications/sacn-vitamin-d-and-health-report)  
15 [report](https://www.gov.uk/government/publications/sacn-vitamin-d-and-health-report)  
16  
17 22. National Institutes of Health, Office of Dietary Supplements. Vitamin D: fact sheet for  
18 health professionals. 24 March 2020. [https://ods.od.nih.gov/factsheets/VitaminD-](https://ods.od.nih.gov/factsheets/VitaminD-HealthProfessional/#h2)  
19 [HealthProfessional/#h2](https://ods.od.nih.gov/factsheets/VitaminD-HealthProfessional/#h2)  
20  
21 23. EFSA Panel on Dietetic Products, Nutrition and Allergies. Dietary reference values for  
22 vitamin D. *EFSA Journal* 2016;14(10):e04547. doi: 10.2903/j.efsa.2016.4547  
23  
24 24. Cao Z, Wu Y, Faucon E, Sabatier JM. SARS-CoV-2 & Covid-19: key-roles of the 'renin-  
25 angiotensin' system / vitamin D impacting drug and vaccine developments. *Infect*  
26 *Disord Drug Targets* 2020;20(1). doi: 10.2174/1871526520999200505174704  
27  
28 25. Jakovac H. COVID-19 and vitamin D: is there a link and an opportunity for intervention?  
29 *Am J Physiol Endocrinol Metab* 2020;318(5):E589. doi: 10.1152/ajpendo.00138.2020  
30  
31 26. Mitchell F. Vitamin-D and COVID-19: do deficient risk a poorer outcome? *Lancet*  
32 *Diabetes Endocrinol* 2020;8(7):570. doi: 10.1016/S2213-8587(20)30183-2  
33  
34 27. Silberstein M. Vitamin D: a simpler alternative to tocilizumab for trial in COVID-19? *Med*  
35 *Hypotheses* 2020;140:109767. doi: 10.1016/j.mehy.2020.109767  
36  
37 28. Calder PC, Carr AC, Gombart AF, Eggersdorfer M. Optimal nutritional status for a well-  
38 functioning immune system is an important factor to protect against viral infections.  
39 *Nutrients* 2020;12(4):1181. doi: <https://dx.doi.org/10.3390/nu12041181>  
40  
41 29. Tian Y, Rong L. Letter: Covid-19, and vitamin D. Authors' reply. *Aliment Pharmacol Ther*  
42 2020;51(10):995-96. doi: 10.1111/apt.15764  
43  
44 30. Busby M. UK public health bodies reviewing vitamin D's effects on coronavirus. The  
45 Guardian; 17 June 2020. [https://www.theguardian.com/world/2020/jun/17/uk-](https://www.theguardian.com/world/2020/jun/17/uk-ministers-order-urgent-vitamin-d-coronavirus-review)  
46 [ministers-order-urgent-vitamin-d-coronavirus-review](https://www.theguardian.com/world/2020/jun/17/uk-ministers-order-urgent-vitamin-d-coronavirus-review)  
47  
48 31. Coronavirus: Should I start taking vitamin D? BBC News; 18 June 2020.  
49 <https://www.bbc.co.uk/news/health-52371688>  
50  
51 32. Torjesen I. Covid-19: Public health agencies review whether vitamin D supplements  
52 could reduce risk. *BMJ* 2020;369:m2475. doi: 10.1136/bmj.m2475  
53  
54 33. Grant WB, Lahore H, McDonnell SL, et al. Evidence that vitamin D supplementation  
55 could reduce risk of influenza and COVID-19 infections and deaths. *Nutrients*  
56 2020;12(4):988. doi: 10.3390/nu12040988  
57  
58 34. Parker J, Hashmi O, Dutton D, et al. Levels of vitamin D and cardiometabolic disorders:  
59 systematic review and meta-analysis. *Maturitas* 2010;65(3):225-36. doi:  
60 10.1016/j.maturitas.2009.12.013  
35. Cannell JJ, Vieth R, Umhau JC, et al. Epidemic influenza and vitamin D. *Epidemiol Infect*  
2006;134(6):1129-40. doi: 10.1017/s0950268806007175  
36. Jolliffe DA, Griffiths CJ, Martineau AR. Vitamin D in the prevention of acute respiratory  
infection: systematic review of clinical studies. *J Steroid Biochem Mol Biol*  
2013;136:321-9. doi: 10.1016/j.jsbmb.2012.11.017

- 1
- 2
- 3
- 4 37. Nnoaham KE, Clarke A. Low serum vitamin D levels and tuberculosis: a systematic review
- 5 and meta-analysis. *Int J Epidemiol* 2008;37(1):113-19. doi: 10.1093/ije/dym247
- 6 38. Martineau AR, Jolliffe DA, Hooper RL, et al. Vitamin D supplementation to prevent acute
- 7 respiratory tract infections: systematic review and meta-analysis of individual
- 8 participant data. *BMJ* 2017;356:i6583. doi: 10.1136/bmj.i6583
- 9 39. Bolland MJ, Avenell A. Do Vitamin D supplements help prevent respiratory tract
- 10 infections? *BMJ* 2017;356:j456. doi: 10.1136/bmj.j456
- 11 40. National Institute for Health and Care Excellence. COVID-19 rapid evidence summary:
- 12 vitamin D for COVID-19. 29 June 2020.
- 13 <https://www.nice.org.uk/advice/es28/chapter/Key-messages>
- 14 41. Royal Society. Vitamin D and covid-19. 18 June 2020. [https://royalsociety.org/-](https://royalsociety.org/-/media/policy/projects/set-c/set-c-vitamin-d-and-covid-19.pdf)
- 15 [/media/policy/projects/set-c/set-c-vitamin-d-and-covid-19.pdf](https://royalsociety.org/-/media/policy/projects/set-c/set-c-vitamin-d-and-covid-19.pdf)
- 16 42. Lee J, van Hecke O, Roberts N, on behalf of the Oxford COVID-19 Evidence Service Team.
- 17 Vitamin D: a rapid review of the evidence for treatment or prevention in COVID-19.
- 18 Centre for Evidence-Based Medicine, University of Oxford; 1 May 2020.
- 19 [https://www.cebm.net/covid-19/vitamin-d-a-rapid-review-of-the-evidence-for-](https://www.cebm.net/covid-19/vitamin-d-a-rapid-review-of-the-evidence-for-treatment-or-prevention-in-covid-19/)
- 20 [treatment-or-prevention-in-covid-19/](https://www.cebm.net/covid-19/vitamin-d-a-rapid-review-of-the-evidence-for-treatment-or-prevention-in-covid-19/)
- 21 43. Moher D, Liberati A, Tetzlaff J, Altman DG. Preferred reporting items for systematic
- 22 reviews and meta-analyses: the PRISMA statement. *BMJ* 2009;339:b2535. doi:
- 23 10.1136/bmj.b2535
- 24 44. World Health Organization. Global research on coronavirus disease (COVID-19) [online
- 25 database]. 2020. [https://www.who.int/emergencies/diseases/novel-coronavirus-](https://www.who.int/emergencies/diseases/novel-coronavirus-2019/global-research-on-novel-coronavirus-2019-ncov)
- 26 [2019/global-research-on-novel-coronavirus-2019-ncov](https://www.who.int/emergencies/diseases/novel-coronavirus-2019/global-research-on-novel-coronavirus-2019-ncov)
- 27 45. Oxford COVID-19 Evidence Service. Centre for Evidence-Based Medicine, University of
- 28 Oxford; 2020. <https://www.cebm.net/oxford-covid-19-evidence-service/>
- 29 46. Counotte M, Imeri H, Ipekci M, Low N. Living evidence on COVID-19 [online database].
- 30 University of Bern Institute of Social and Preventive Medicine; 2020.
- 31 <https://zika.ispm.unibe.ch/assets/data/pub/ncov/>
- 32 47. Centers for Disease Control and Prevention. CDC SARS response timeline. 2013.
- 33 <https://www.cdc.gov/about/history/sars/timeline.htm>
- 34 48. Downs SH, Black N. The feasibility of creating a checklist for the assessment of the
- 35 methodological quality both of randomised and non-randomised studies of health
- 36 care interventions. *J Epidemiol Community Health* 1998;52(6):377-84. doi:
- 37 10.1136/jech.52.6.377
- 38 49. Carter SJ, Baranuskas MN, Fly AD. Considerations for obesity, vitamin D, and physical
- 39 activity amidst the COVID-19 pandemic. *Obesity (Silver Spring)* 2020;28:1176-77. doi:
- 40 10.1002/oby.22838
- 41 50. Molloy EJ, Murphy N. Vitamin D, covid-19 and children. *Ir Med J* 2020;113(4):64
- 42 51. McCartney DM, Byrne DG. Optimisation of vitamin D status for enhanced immuno-
- 43 protection against covid-19. *Ir Med J* 2020;113(4):P58
- 44 52. Adams KK, Baker WL, Sobieraj DM. Myth busters: dietary supplements and COVID-19.
- 45 *Ann Pharmacother* 2020;54(8):820-26. doi: 10.1177/1060028020928052
- 46 53. de Lucena TMC, da Silva Santos AF, de Lima BR, de Albuquerque Borborema ME, de
- 47 Azevedo Silva J. Mechanism of inflammatory response in associated comorbidities in
- 48 COVID-19. *Diabetes Metab Syndr* 2020;14(4):597-600. doi:
- 49 10.1016/j.dsx.2020.05.025
- 50
- 51
- 52
- 53
- 54
- 55
- 56
- 57
- 58
- 59
- 60

- 1
- 2
- 3
- 4 54. Ghasemian R, Shamshirian A, Heydari K, et al. The role of vitamin D in the age of COVID-
- 5 19: a systematic review and meta-analysis along with an ecological approach.
- 6 *medRxiv* 2020. doi: 10.1101/2020.06.05.20123554
- 7
- 8 55. Hribar CA, Cobbold PH, Church FC. Potential role of vitamin D in the elderly to resist
- 9 COVID-19 and to slow progression of Parkinson's disease. *Brain Sci* 2020;10(5):284.
- 10 doi: 10.3390/brainsci10050284
- 11
- 12 56. Laird E, Rhodes J, Kenny RA. Vitamin D and inflammation: potential implications for
- 13 severity of Covid-19. *Ir Med J* 2020;113(5):P81
- 14
- 15 57. McKenna MJ, Flynn MAT. Covid-19, cocooning and vitamin D intake requirements. *Ir*
- 16 *Med J* 2020;113(5):P79
- 17
- 18 58. Ribeiro H, Santana KVS, Oliver SL, et al. Does vitamin D play a role in the management of
- 19 Covid-19 in Brazil? *Rev Saude Publica* 2020;54:53
- 20
- 21 59. Speeckaert MM, Delanghe JR. Association between low vitamin D and COVID-19: don't
- 22 forget the vitamin D binding protein. *Aging Clin Exp Res* 2020. doi: 10.1007/s40520-
- 23 020-01607-y
- 24
- 25 60. Suresh PS. Hypovitaminosis D and COVID-19: matter of concern in India? *Indian J Clin*
- 26 *Biochem* 2020. doi: 10.1007/s12291-020-00894-6
- 27
- 28 61. Tan SHS, Hong CC, Saha S, Murphy D, Hui JH. Medications in COVID-19 patients:
- 29 summarizing the current literature from an orthopaedic perspective. *Int Orthop*
- 30 2020. doi: 10.1007/s00264-020-04643-5
- 31
- 32 62. Zabetakis I, Lordan R, Norton C, Tsoupras A. COVID-19: the inflammation link and the
- 33 role of nutrition in potential mitigation. *Nutrients* 2020;12(5):1466. doi:
- 34 10.3390/nu12051466
- 35
- 36 63. Lau FH, Majumder R, Torabi R, et al. Vitamin D insufficiency is prevalent in severe
- 37 COVID-19. *medRxiv* 2020. doi: 10.1101/2020.04.24.20075838
- 38
- 39 64. Darling AL, Ahmadi KR, Ward KA, et al. Vitamin D status, body mass index, ethnicity and
- 40 COVID-19: initial analysis of the first-reported UK Biobank COVID-19 positive cases (n
- 41 580) compared with negative controls (n 723). *medRxiv* 2020. doi:
- 42 10.1101/2020.04.29.20084277
- 43
- 44 65. De Smet D, De Smet K, Herroelen P, Gryspeerdt S, Martens GA. Vitamin D deficiency as
- 45 risk factor for severe COVID-19: a convergence of two pandemics. *medRxiv* 2020.
- 46 doi: 10.1101/2020.05.01.20079376
- 47
- 48 66. Meltzer DO, Best TJ, Zhang H, Vokes T, Arora V, Solway J. Association of vitamin D
- 49 deficiency and treatment with COVID-19 incidence. *medRxiv* 2020. doi:
- 50 10.1101/2020.05.08.20095893
- 51
- 52 67. Notari A, Torrieri G. COVID-19 transmission risk factors. *medRxiv* 2020. doi:
- 53 10.1101/2020.05.08.20095083
- 54
- 55 68. Raisi-Estabragh Z, McCracken C, Bethell MS, et al. Greater risk of severe COVID-19 in
- 56 non-White ethnicities is not explained by cardiometabolic, socioeconomic, or
- 57 behavioural factors, or by 25(OH)-vitamin D status: study of 1,326 cases from the UK
- 58 Biobank. *medRxiv* 2020. doi: 10.1101/2020.06.01.20118943
- 59
- 60 69. Tan CW, Ho LP, Kalimuddin S, et al. A cohort study to evaluate the effect of combination
- vitamin D, magnesium and vitamin B12 (DMB) on progression to severe outcome in
- older COVID-19 patients. *medRxiv* 2020. doi: 10.1101/2020.06.01.20112334
70. Hastie CE, Mackay DF, Ho F, et al. Vitamin D concentrations and COVID-19 infection in
- UK Biobank. *Diabetes Metab Syndr* 2020;14(4):561-65. doi:
- 10.1016/j.dsx.2020.04.050



- 1
- 2
- 3
- 4 71. Ilie PC, Stefanescu S, Smith L. The role of vitamin D in the prevention of coronavirus
- 5 disease 2019 infection and mortality. *Aging Clin Exp Res* 2020. doi: 10.1007/s40520-
- 6 020-01570-8
- 7 72. UK Biobank. About UK Biobank. 17 June 2020. [https://www.ukbiobank.ac.uk/about-](https://www.ukbiobank.ac.uk/about-biobank-uk/)
- 8 [biobank-uk/](https://www.ukbiobank.ac.uk/about-biobank-uk/)
- 9 73. D'Avolio A, Avataneo V, Manca A, et al. 25-hydroxyvitamin D concentrations are lower in
- 10 patients with positive PCR for SARS-CoV-2. *Nutrients* 2020;12(5):1359. doi:
- 11 10.3390/nu12051359
- 12 74. Fasano A, Cereda E, Barichella M, et al. COVID-19 in Parkinson's Disease Patients Living
- 13 in Lombardy, Italy. *Mov Disord* 2020. doi: 10.1002/mds.28176
- 14 75. Liu Y, Mao B, Liang S, et al. Association between age and clinical characteristics and
- 15 outcomes of COVID-19. *Eur Respir J* 2020;55(5):2001112. doi:
- 16 10.1183/13993003.01112-2020
- 17 76. Verity R, Okell LC, Dorigatti I, et al. Estimates of the severity of coronavirus disease 2019:
- 18 a model-based analysis. *Lancet Infect Dis* 2020;20(6):669-77. doi: 10.1016/s1473-
- 19 3099(20)30243-7
- 20 77. Mahase E. Covid-19: death rate is 0.66% and increases with age, study estimates. *BMJ*
- 21 2020;369:m1327. doi: 10.1136/bmj.m1327
- 22 78. Fulzele S, Sahay B, Yusufu I, et al. COVID-19 virulence in aged patients might be
- 23 impacted by the host cellular microRNAs abundance/profile. *Aging Dis*
- 24 2020;11(3):509-22. doi: 10.14336/ad.2020.0428
- 25 79. Koff WC, Williams MA. Covid-19 and immunity in aging populations: a new research
- 26 agenda. *N Engl J Med* 2020. doi: 10.1056/NEJMp2006761
- 27 80. Pan D, Sze S, Minhas JS, et al. The impact of ethnicity on clinical outcomes in COVID-19:
- 28 a systematic review. *EClinicalMedicine*. doi: 10.1016/j.eclinm.2020.100404
- 29 81. Lee C. "Race" and "ethnicity" in biomedical research: how do scientists construct and
- 30 explain differences in health? *Soc Sci Med* 2009;68(6):1183-90. doi:
- 31 10.1016/j.socscimed.2008.12.036
- 32 82. Stead WW, Senner JW, Reddick WT, Lofgren JP. Racial differences in susceptibility to
- 33 infection by Mycobacterium tuberculosis. *N Engl J Med* 1990;322(7):422-7. doi:
- 34 10.1056/nejm199002153220702
- 35 83. Nahid P, Horne DJ, Jarlsberg LG, et al. Racial differences in tuberculosis infection in
- 36 United States communities: the coronary artery risk development in young adults
- 37 study. *Clin Infect Dis* 2011;53(3):291-4. doi: 10.1093/cid/cir378
- 38 84. Bime C, Poongkunran C, Borgstrom M, et al. Racial differences in mortality from severe
- 39 acute respiratory failure in the United States, 2008-2012. *Ann Am Thorac Soc*
- 40 2016;13(12):2184-89. doi: 10.1513/AnnalsATS.201605-359OC
- 41 85. Lanham-New SA, Webb AR, Cashman KD, et al. Vitamin D and SARS-CoV-2 virus/COVID-
- 42 19 disease. *BMJ Nutrition, Prevention & Health* 2020:bmjnph-2020-000089. doi:
- 43 10.1136/bmjnph-2020-000089
- 44 86. Huang F, Zhang C, Liu Q, et al. Identification of amitriptyline HCl, flavin adenine
- 45 dinucleotide, azacitidine and calcitriol as repurposing drugs for influenza A H5N1
- 46 virus-induced lung injury. *PLoS Pathog* 2020;16(3):e1008341. doi:
- 47 10.1371/journal.ppat.1008341
- 48 87. Lee C. Controversial effects of vitamin D and related genes on viral infections,
- 49 pathogenesis, and treatment outcomes. *Nutrients* 2020;12(4):962. doi:
- 50 10.3390/nu12040962
- 51
- 52
- 53
- 54
- 55
- 56
- 57
- 58
- 59
- 60

- 1  
2  
3 88. Impact of zinc and vitamin D3 supplementation on the survival of aged patients infected  
4 with COVID-19. NCT04351490. ClinicalTrials.gov, U.S. National Library of Medicine;  
5 2020. <https://ClinicalTrials.gov/show/NCT04351490>  
6  
7 89. COvid-19 and Vitamin D supplementation: a multicenter randomized controlled trial of  
8 high dose versus standard dose vitamin D3 in high-risk COVID-19 Patients  
9 (CoVitTrial). NCT04344041. ClinicalTrials.gov, U.S. National Library of Medicine;  
10 2020. <https://clinicaltrials.gov/show/NCT04344041>  
11  
12 90. The VITDALIZE Study: effect of high-dose vitamin D3 on 28-day mortality in adult  
13 critically ill patients. NCT03188796. ClinicalTrials.gov, U.S. National Library of  
14 Medicine; 2017. <https://ClinicalTrials.gov/show/NCT03188796>  
15  
16 91. Scientific Advisory Committee on Nutrition, European Food Safety Authority. Joint  
17 explanatory note by the European Food Safety Authority and the UK Scientific  
18 Advisory Committee on Nutrition regarding dietary reference values for vitamin D.  
19 2016.  
20 [https://www.efsa.europa.eu/sites/default/files/documents/news/explanatory\\_note](https://www.efsa.europa.eu/sites/default/files/documents/news/explanatory_note_EFSA_SACN_vitaminD.pdf)  
21 [\\_EFSA\\_SACN\\_vitaminD.pdf](https://www.efsa.europa.eu/sites/default/files/documents/news/explanatory_note_EFSA_SACN_vitaminD.pdf)  
22  
23  
24  
25

## 26 **Figure legends**

27  
28 Figure 1. PRISMA flow diagram for the selection of studies  
29  
30  
31  
32  
33  
34  
35  
36  
37  
38  
39  
40  
41  
42  
43  
44  
45  
46  
47  
48  
49  
50  
51  
52  
53  
54  
55  
56  
57  
58  
59  
60





## Supplemental file

### Contents

1. Full record of search
2. Full details of the study eligibility criteria
3. List of studies excluded at full text review
4. Articles included at full text, but later excluded at time of narrative synthesis
5. Quality assessment of included studies

#### 1. Full record of search

#### Medline (Ovid)

Search date: 06/05/2020

Database: Ovid MEDLINE(R) ALL <1946 to May 05, 2020>

Search Strategy:

- 
- 1 exp Vitamin D/ (58492)
  - 2 Vitamin D Deficiency/ (15552)
  - 3 (vitamin D? or vit D? or D vitamin? or ergocalciferol or cholecalciferol or colecalciferol or calciferol or dihydroergocalciferol or sitocalciferol or dihydrotachysterol or dihydroxycholecalciferol? or hydroxycholecalciferol? or "25(OH)D?" or 25OHD? or calcidiol or hydroxyergocalciferol or alfacalcidol or alphacalcidol or "1,25(OH)2D" or hydroxyvitamin D? or dihydroxyvitamin D?).ab,kf,ti. (78232)
  - 4 (paricalcitol or doxercalciferol or doxerocalciferol or calcifediol or calcitriol).ab,kf,ti. (5577)
  - 5 hypovitaminosis D?.ab,kf,ti. (1775)
  - 6 ((D or D2 or D3) adj3 supplement\*).ab,kf,ti. (12158)
  - 7 1 or 2 or 3 or 4 or 5 or 6 (92560)
  - 8 coronavirus/ or betacoronavirus/ or betacoronavirus 1/ or coronavirus oc43, human/ or middle east respiratory syndrome coronavirus/ or sars virus/ (7431)
  - 9 coronavirus infections/ or severe acute respiratory syndrome/ (10675)
  - 10 (((corona\* or corono\*) adj1 (virus\* or viral\* or virinae\*)) or coronavirus\* or coronovirus\* or coronavirinae\* or Coronavirus\* or Coronovirus\* or Wuhan\* or Hubei\* or Huanan or "2019-nCoV" or 2019nCoV or nCoV2019 or "nCoV-2019" or "COVID-19" or COVID19 or "CORVID-19" or CORVID19 or "WN-CoV" or WNCov or "HCoV-19" or HCoV19 or CoV or "2019 novel\*" or Ncov or "n-cov" or "SARS-CoV-2" or "SARSCoV-2" or "SARSCoV2" or "SARS-CoV2" or SARSCov19 or "SARS-Cov19" or "SARSCov-19" or "SARS-Cov-19" or Ncovor or Ncorona\* or Ncorono\* or NcovWuhan\* or NcovHubei\* or NcovChina\* or NcovChinese\*).ab,kf,ti. (26891)
  - 11 (severe acute respiratory syndrome or SARS or Middle East respiratory syndrome or MERS).ab,kf,ti. (16560)
  - 12 (betacoronavirus\* or betacoronavirinae\*).ab,kf,ti. (280)
  - 13 8 or 9 or 10 or 11 or 12 (37180)
  - 14 7 and 13 (32)
  - 15 exp Animals/ (23144176)

- 16 exp Humans/ (18448248)
- 17 15 not 16 (4695928)
- 18 14 not 17 (30)
- 19 limit 18 to yr="2002 -Current" (30)

#### Update

Search date: 10/6/2020

Actual databases searched: Ovid MEDLINE All <1946 to June 09, 2020>

Search strategy:

Re-ran search above plus...

- 20 limit 19 to ed=20200506-20200610 (8)
- 21 limit 19 to ep=20200506-20200610 (39)
- 22 limit 19 to dt=20200506-20200610 (43)
- 23 limit 19 to ez=20200506-20200610 (27)
- 24 20 or 21 or 22 or 23 (46)

#### Embase (Ovid)

Search date: 06/05/2020

Database: Embase <1974 to 2020 May 05>

Search Strategy:

- 
- 1 exp vitamin D/ (139781)
  - 2 vitamin D deficiency/ (29333)
  - 3 (vitamin D? or vit D? or D vitamin? or ergocalciferol or cholecalciferol or colecalciferol or calciferol or dihydroergocalciferol or sitocalciferol or dihydrotachysterol or dihydroxycholecalciferol? or hydroxycholecalciferol? or "25(OH)D?" or 25OHD? or calcidiol or hydroxyergocalciferol or alfacalcidol or alphacalcidol or "1,25(OH)2D" or hydroxyvitamin D? or dihydroxyvitamin D?).ab,kw,ti. (112459)
  - 4 (paricalcitol or doxercalciferol or doxerocalciferol or calcifediol or calcitriol).ab,kw,ti. (8478)
  - 5 hypovitaminosis D?.ab,kw,ti. (3012)
  - 6 ((D or D2 or D3) adj3 supplement\*).ab,kw,ti. (19177)
  - 7 1 or 2 or 3 or 4 or 5 or 6 (163395)
  - 8 betacoronavirus 1/ or betacoronavirus/ or human coronavirus oc43/ (696)
  - 9 Middle East respiratory syndrome coronavirus/ (2028)
  - 10 sars-related coronavirus/ or sars coronavirus/ (6354)
  - 11 Coronavirinae/ (2231)
  - 12 coronavirus infection/ or middle east respiratory syndrome/ or severe acute respiratory syndrome/ (11950)
  - 13 (((corona\* or corono\*) adj1 (virus\* or viral\* or virinae\*)) or coronavirus\* or coronovirus\* or coronavirinae\* or Coronavirus\* or Coronovirus\* or Wuhan\* or Hubei\* or Huanan or "2019-nCoV" or 2019nCoV or nCoV2019 or "nCoV-2019" or "COVID-19" or COVID19 or "CORVID-19" or CORVID19 or "WN-CoV" or WNCov or "HCoV-19" or HCoV19 or CoV or "2019 novel\*" or Ncov or "n-cov" or "SARS-CoV-2" or "SARSCoV-2" or "SARSCoV2" or "SARS-CoV2" or SARSCov19 or "SARS-Cov19" or "SARSCov-19" or "SARS-Cov-19" or Ncover or Ncorona\* or Ncorono\* or NcovWuhan\* or NcovHubei\* or NcovChina\* or NcovChinese\*).ab,kw,ti. (27686)
  - 14 (severe acute respiratory syndrome or SARS or Middle East respiratory syndrome or MERS).ab,kw,ti. (17146)
  - 15 (betacoronavirus\* or betacoronavirinae\*).ab,kw,ti. (275)
  - 16 8 or 9 or 10 or 11 or 12 or 13 or 14 or 15 (40716)

1  
2  
3 17 7 and 16 (61)  
4 18 exp animal/ (25459151)  
5 19 exp human/ (20834835)  
6 20 18 not 19 (4624316)  
7 21 17 not 20 (58)  
8 22 limit 21 to yr="2002 -Current" (58)  
9

#### 10 Update

11 Search date: 10/6/2020

12 Actual databases searched: Ovid Embase <1974 to 2020 June 09>

13 Search strategy:

14 Re-ran search above plus...

15 22 limit 21 to yr="2002 -Current" (123)  
16 23 limit 22 to dd=20200506-20200610 (39)  
17 24 limit 22 to em=202005-202006 (0)  
18 25 limit 22 to dc=20200506-20200610 (62)  
19 26 23 or 24 or 25 (62)  
20  
21  
22  
23

24 **MedrXiv** (searched via Medrxivr <https://mcguinlu.shinyapps.io/medrxivr/>)

25 Search date: 07/05/2020

26 Search Strategy:

27 Topic 1:

28 [Vv]itamin D  
29 [Vv]itamin D2  
30 [Vv]itamin D3  
31 calciferol  
32 25OHD  
33 25OHD3  
34 [Hh]ypovitaminosis D  
35  
36  
37  
38  
39  
40  
41

42 Topic 2:

43 [Cc]oronavirus  
44 [Cc]orona(\s)([:graph:]+\s){0,1}virus  
45 [Cc]oronavirinae  
46 [Cc]ovid  
47 COVID  
48 nCoV  
49 NCOV  
50 Ncov  
51 [Nn]-cov  
52 N-COV  
53 2019ncov  
54 2019-ncov  
55 ncov2019  
56 ncov-2019  
57  
58  
59  
60

1  
2  
3 SARS

4 [Ss]evere [Aa]cute [Rr]espiratory [Ss]yndrome

5 [Mm]iddle [Ee]ast [Rr]espiratory [Ss]yndrome

6 MERS  
7

8  
9 Earliest record date

10 20190101

11 Latest record date

12 20200507

13 Remove older versions of the same record  
14

15 6 results  
16

17 Update

18 Search date: 10/6/2020

19 Re-ran search above changing record dates as follows:

20 Earliest record date

21 20200507

22 Latest record date

23 20200610

24 Remove older versions of the same record  
25  
26

27  
28 11 results  
29

30  
31 **BioRxiv**

32 <https://www.biorxiv.org/>

33  
34 Search date: 07/05/2020  
35

36 65 Results

37 for abstract or title "vitamin D" (match phrase words)  
38  
39

40 22 Results

41 for full text or abstract or title "ergocalciferol cholecalciferol colecalciferol" (match whole any)  
42  
43

44 41 Results

45 for full text or abstract or title "25OHD 25OHD3" (match whole any)  
46

47 Imported into EndNote and de-duplicated

48 92 results after deduplication  
49

50 Searched in Endnote using the following search strategy:

51 coronavirus or corona or covid or SARS or MERS or betacoronavirus or ncov

52 *Any Field*  
53

54 5 results  
55  
56

57  
58 Update

59 Search date: 10/6/2020  
60

## 1 Results

for abstract or title "vitamin D" (match phrase words) and posted between "07 May, 2020 and 10 Jun, 2020" – *animal study (also in both results sets below) so not exported to EndNote*

## 3 Results

for full text or abstract or title "ergocalciferol cholecalciferol colecalciferol" (match whole any) and posted between "07 May, 2020 and 10 Jun, 2020" - *2 animal studies and 1 on sertraline in TB*

## 2 Results

for full text or abstract or title "25OHD 25OHD3" (match whole any) and posted between "07 May, 2020 and 10 Jun, 2020" - *1 animal study, 1 non-clinical / non-coronavirus*

0 results relevant to coronaviruses

**Cochrane Library**

Search date: 08/05/2020

| ID  | Search                                                                                                                                                                                                                                                                                                                                                                                                                                                                                                                                                                                                          | Hits  |
|-----|-----------------------------------------------------------------------------------------------------------------------------------------------------------------------------------------------------------------------------------------------------------------------------------------------------------------------------------------------------------------------------------------------------------------------------------------------------------------------------------------------------------------------------------------------------------------------------------------------------------------|-------|
| #1  | MeSH descriptor: [Vitamin D] explode all trees                                                                                                                                                                                                                                                                                                                                                                                                                                                                                                                                                                  | 5224  |
| #2  | MeSH descriptor: [Vitamin D Deficiency] this term only                                                                                                                                                                                                                                                                                                                                                                                                                                                                                                                                                          | 1226  |
| #3  | ((vitamin NEXT D?) or (vit NEXT D?) or (D NEXT vitamin?) or ergocalciferol or cholecalciferol or colecalciferol or calciferol or dihydroergocalciferol or sitocalciferol or dihydrotachysterol or dihydroxycholecalciferol? or hydroxycholecalciferol? or "25(OH)D" or "25(OH)D3" or 25OHD? or calcdiol or hydroxyergocalciferol or alfalcidol or alphacalcidol or "1,25(OH)2D" or (hydroxyvitamin NEXT D?) or (dihydroxyvitamin NEXT D?):ti,ab,kw                                                                                                                                                              | 12959 |
| #4  | (paricalcitol or doxercalciferol or doxerocalciferol or calcifediol or calcitriol):ti,ab,kw                                                                                                                                                                                                                                                                                                                                                                                                                                                                                                                     | 2417  |
| #5  | hypovitaminosis NEXT D?                                                                                                                                                                                                                                                                                                                                                                                                                                                                                                                                                                                         | 303   |
| #6  | ((D OR D2 OR D3) NEAR/3 supplement*):ti,ab,kw                                                                                                                                                                                                                                                                                                                                                                                                                                                                                                                                                                   | 5633  |
| #7  | #1 or #2 or #3 or #4 or #5 or #6                                                                                                                                                                                                                                                                                                                                                                                                                                                                                                                                                                                | 14461 |
| #8  | MeSH descriptor: [Coronavirus] this term only                                                                                                                                                                                                                                                                                                                                                                                                                                                                                                                                                                   | 2     |
| #9  | MeSH descriptor: [Betacoronavirus] this term only                                                                                                                                                                                                                                                                                                                                                                                                                                                                                                                                                               | 2     |
| #10 | MeSH descriptor: [Betacoronavirus 1] this term only                                                                                                                                                                                                                                                                                                                                                                                                                                                                                                                                                             | 0     |
| #11 | MeSH descriptor: [Coronavirus OC43, Human] this term only                                                                                                                                                                                                                                                                                                                                                                                                                                                                                                                                                       | 0     |
| #12 | MeSH descriptor: [Middle East Respiratory Syndrome Coronavirus] explode all trees                                                                                                                                                                                                                                                                                                                                                                                                                                                                                                                               | 1     |
| #13 | MeSH descriptor: [SARS Virus] this term only                                                                                                                                                                                                                                                                                                                                                                                                                                                                                                                                                                    | 9     |
| #14 | MeSH descriptor: [Coronavirus Infections] this term only                                                                                                                                                                                                                                                                                                                                                                                                                                                                                                                                                        | 137   |
| #15 | MeSH descriptor: [Severe Acute Respiratory Syndrome] this term only                                                                                                                                                                                                                                                                                                                                                                                                                                                                                                                                             | 107   |
| #16 | ((((corona* or corono*) near/1 (virus* or viral* or virinae*)) or coronavirus* or coronavirus* or coronavirinae* or Coronavirus* or Coronavirus* or Wuhan* or Hubei* or Huanan or "2019-nCoV" or 2019nCoV or nCoV2019 or "nCoV-2019" or "COVID-19" or COVID19 or "CORVID-19" or CORVID19 or "WN-CoV" or WNCov or "HCoV-19" or HCoV19 or CoV or "2019 novel*" or Ncov or "n-cov" or "SARS-CoV-2" or "SARSCoV-2" or "SARSCoV2" or "SARS-CoV2" or SARSCov19 or "SARS-Cov19" or "SARSCov-19" or "SARS-Cov-19" or Ncover or Ncorona* or Ncorono* or NcovWuhan* or NcovHubei* or NcovChina* or NcovChinese*):ti,ab,kw | 614   |
| #17 | ("severe acute respiratory syndrome" or SARS or "Middle East respiratory syndrome" or MERS):ti,ab,kw                                                                                                                                                                                                                                                                                                                                                                                                                                                                                                            | 350   |
| #18 | (betacoronavirus* or betacoronavirinae*):ti,ab,kw                                                                                                                                                                                                                                                                                                                                                                                                                                                                                                                                                               | 4     |

1  
2  
3 #19 #8 or #9 or #10 or #11 or #12 or #13 or #14 or #15 or #16 or #17 or #18 798  
4 #20 #7 and #19 3  
5

6 [all 3 results were from CENTRAL]  
7

8 Update

9 Search date: 10/06/2020

10 Re-ran search exactly as above and retrieved 5 results, all from CENTRAL. All 5 results exported to  
11 EndNote for deduplication.  
12  
13

14  
15 **Database of publications (living map of evidence) on coronavirus disease (COVID-19) developed by**  
16 **the University of Bern**  
17

18 Living Evidence on COVID-19

19 Contributors: Michel Counotte, Hira Imeri, Mert Ipekci, Nicola Low  
20  
21

22 <https://zika.ispm.unibe.ch/assets/data/pub/ncov/>  
23

24 Search date: 10/05/2020 (14,988 entries)  
25

26 Search: Title, Abstract

27 Search:  
28

29  
30 vitamin D 13  
31 vitamin D2 0  
32 vitamin D3 0  
33 ergocalciferol 0  
34 cholecalciferol 0  
35 coledalciferol 0  
36 25(OH)D 0  
37 25OHD 0  
38 25(OH)D3 0  
39 25OHD3 0  
40 hypovitaminosis D 1  
41 Vitamin D Deficiency 1  
42  
43  
44

45 **Oxford COVID-19 Evidence Service**

46 <https://www.cebm.net/oxford-covid-19-evidence-service/>

47 The Centre for Evidence-Based Medicine (CEBM) The University of Oxford  
48  
49

50 Search date: 10/05/2020 (142 articles)

51 vitamin D 1  
52 vitamin D2 0  
53 vitamin D3 0  
54 ergocalciferol 0  
55 cholecalciferol 0  
56 coledalciferol 0  
57 25(OH)D 0  
58 25OHD 0  
59  
60

1  
2  
3 25(OH)D3 0  
4 25OHD3 0  
5 hypovitaminosis D 0  
6 Vitamin D Deficiency 0  
7  
8  
9

10 **Database of publications on coronavirus disease (COVID-19) developed by WHO**

11 [https://www.who.int/emergencies/diseases/novel-coronavirus-2019/global-research-on-novel-](https://www.who.int/emergencies/diseases/novel-coronavirus-2019/global-research-on-novel-coronavirus-2019-ncov)  
12 [coronavirus-2019-ncov](https://www.who.int/emergencies/diseases/novel-coronavirus-2019/global-research-on-novel-coronavirus-2019-ncov)  
13

14 Search date: 10/05/2020 (15,253 entries)

15  
16 Search: Title, Abstract, Subject

17  
18  
19 vitamin D 19  
20 vitamin D2 0  
21 vitamin D3 2  
22 ergocalciferol 0  
23 cholecalciferol 1  
24 coilecalciferol 0  
25 25(OH)D 0  
26 25OHD 0  
27 25(OH)D3 0  
28 25OHD3 0  
29 hypovitaminosis D 1  
30 Vitamin D Deficiency 2  
31  
32

33 Total: 25

34 After de-duplication: 20  
35  
36  
37

38 **Searches for systematic reviews, for reference checking**

39  
40 **Medline**

41  
42 Search date: 19/05/2020

43 Database: Ovid MEDLINE(R) ALL <1946 to May 18, 2020>

44 Search Strategy:  
45  
46 -----

47 1 exp Vitamin D/ (58577)  
48 2 Vitamin D Deficiency/ (15588)  
49 3 (vitamin D? or vit D? or D vitamin? or ergocalciferol or cholecalciferol or coilecalciferol or  
50 calciferol or dihydroergocalciferol or sitocalciferol or dihydrotachysterol or dihydroxycholecalciferol?  
51 or hydroxycholecalciferol? or "25(OH)D?" or 25OHD? or calcidiol or hydroxyergocalciferol or  
52 alfalcidol or alphacalcidol or "1,25(OH)2D" or hydroxyvitamin D? or dihydroxyvitamin D?).ab,kf,ti.  
53 (78395)  
54 4 (paricalcitol or doxercalciferol or doxerocalciferol or calcifediol or calcitriol).ab,kf,ti. (5588)  
55 5 hypovitaminosis D?.ab,kf,ti. (1780)  
56 6 ((D or D2 or D3) adj3 supplement\*).ab,kf,ti. (12198)  
57 7 1 or 2 or 3 or 4 or 5 or 6 (92747)  
58  
59  
60



- 1  
2  
3 8 coronavirus/ or betacoronavirus/ or betacoronavirus 1/ or coronavirus oc43, human/ or middle  
4 east respiratory syndrome coronavirus/ or sars virus/ (8161)  
5 9 coronavirus infections/ or severe acute respiratory syndrome/ (11614)  
6 10 (((corona\* or corono\*) adj1 (virus\* or viral\* or virinae\*)) or coronavirus\* or coronovirus\* or  
7 coronavirinae\* or Coronavirus\* or Coronovirus\* or Wuhan\* or Hubei\* or Huanan or "2019-nCoV" or  
8 2019nCoV or nCoV2019 or "nCoV-2019" or "COVID-19" or COVID19 or "CORVID-19" or CORVID19 or  
9 "WN-CoV" or WNCov or "HCoV-19" or HCoV19 or CoV or "2019 novel\*" or Ncov or "n-cov" or "SARS-  
10 CoV-2" or "SARSCoV-2" or "SARSCoV2" or "SARS-CoV2" or SARSCov19 or "SARS-Cov19" or "SARSCov-  
11 19" or "SARS-Cov-19" or Ncovor or Ncorona\* or Ncorono\* or NcovWuhan\* or NcovHubei\* or  
12 NcovChina\* or NcovChinese\*).ab,kf,ti. (31115)  
13 11 (severe acute respiratory syndrome or SARS or Middle East respiratory syndrome or  
14 MERS).ab,kf,ti. (17795)  
15 12 (betacoronavirus\* or betacoronavirinae\*).ab,kf,ti. (294)  
16 13 exp Respiratory Tract Infections/ (356696)  
17 14 (acute respiratory infection\* or severe respiratory infection\* or acute respiratory tract  
18 infection\* or severe respiratory tract infection\* or influenza or common cold or pneumonia or  
19 bronchitis).ab,kf,ti. (234266)  
20 15 8 or 9 or 10 or 11 or 12 or 13 or 14 (503079)  
21 16 7 and 15 (1062)  
22 17 (metaanalys\* or "meta analys\*" or "meta-analys\*").tw. (169008)  
23 18 (systematic\* adj3 review\*).mp. (200684)  
24 19 meta analysis.pt. (114746)  
25 20 17 or 18 or 19 (301767)  
26 21 16 and 20 (55)  
27  
28  
29  
30  
31  
32

### Embase

33  
34 Search date: 19/05/2020

35  
36 Database: Embase Classic+Embase <1947 to 2020 Week 20>

37 Search Strategy:  
38  
39 -----

- 40 1 exp vitamin D/ (147053)  
41 2 vitamin D deficiency/ (30106)  
42 3 (vitamin D? or vit D? or D vitamin? or ergocalciferol or cholecalciferol or colecalciferol or  
43 calciferol or dihydroergocalciferol or sitocalciferol or dihydrotachysterol or dihydroxycholecalciferol?  
44 or hydroxycholecalciferol? or "25(OH)D?" or 25OHD? or calcidiol or hydroxyergocalciferol or  
45 alfacalcidol or alphacalcidol or "1,25(OH)2D" or hydroxyvitamin D? or dihydroxyvitamin D?).ab,kw,ti.  
46 (118981)  
47 4 (paricalcitol or doxercalciferol or doxerocalciferol or calcifediol or calcitriol).ab,kw,ti. (8485)  
48 5 hypovitaminosis D?.ab,kw,ti. (3033)  
49 6 ((D or D2 or D3) adj3 supplement\*).ab,kw,ti. (19335)  
50 7 1 or 2 or 3 or 4 or 5 or 6 (172654)  
51 8 betacoronavirus 1/ or betacoronavirus/ or human coronavirus oc43/ (1085)  
52 9 Middle East respiratory syndrome coronavirus/ (2082)  
53 10 sars-related coronavirus/ or sars coronavirus/ (6062)  
54 11 Coronavirinae/ (2060)  
55 12 coronavirus infection/ or middle east respiratory syndrome/ or severe acute respiratory  
56 syndrome/ (12565)  
57  
58  
59  
60

1  
2  
3 13 (((corona\* or corono\*) adj1 (virus\* or viral\* or virinae\*)) or coronavirus\* or coronovirus\* or  
4 coronavirinae\* or Coronavirus\* or Coronovirus\* or Wuhan\* or Hubei\* or Huanan or "2019-nCoV" or  
5 2019nCoV or nCoV2019 or "nCoV-2019" or "COVID-19" or COVID19 or "CORVID-19" or CORVID19 or  
6 "WN-CoV" or WNCov or "HCoV-19" or HCoV19 or CoV or "2019 novel\*" or Ncov or "n-cov" or "SARS-  
7 CoV-2" or "SARSCoV-2" or "SARSCoV2" or "SARS-CoV2" or SARSCov19 or "SARS-Cov19" or "SARSCov-  
8 19" or "SARS-Cov-19" or Ncovor or Ncorona\* or Ncorono\* or NcovWuhan\* or NcovHubei\* or  
9 NcovChina\* or NcovChinese\*).ab,kw,ti. (30532)  
10  
11 14 (severe acute respiratory syndrome or SARS or Middle East respiratory syndrome or  
12 MERS).ab,kw,ti. (17954)  
13 15 (betacoronavirus\* or betacoronavirinae\*).ab,kw,ti. (286)  
14 16 exp respiratory tract infection/ (460049)  
15 17 (acute respiratory infection\* or severe respiratory infection\* or acute respiratory tract  
16 infection\* or severe respiratory tract infection\* or influenza or common cold or pneumonia or  
17 bronchitis).ab,kw,ti. (329779)  
18 18 8 or 9 or 10 or 11 or 12 or 13 or 14 or 15 or 16 or 17 (674800)  
19 19 7 and 18 (3315)  
20 20 (metaanalys\* or "meta analys\*" or "meta-analys\*").mp. (294469)  
21 21 (systematic\* adj2 review\*).mp. (330720)  
22 22 20 or 21 (475492)  
23 23 19 and 22 (219)  
24 24 limit 19 to (meta analysis or "systematic review") (145)  
25 25 23 or 24 (219)  
26 26 limit 25 to (conference abstract or conference paper or "conference review" or editorial or  
27 letter) (41)  
28 27 25 not 26 (178)

### Cochrane Database of Systematic Reviews (Cochrane Library)

Search Name: Vitamin D Covid and Acute Respiratory Infections SRs

Date Run: 20/05/2020 18:30:28

Comment:

| ID  | Search                                                                                                                                                                                                                                                                                                                                                                                                                                              | Hits  |
|-----|-----------------------------------------------------------------------------------------------------------------------------------------------------------------------------------------------------------------------------------------------------------------------------------------------------------------------------------------------------------------------------------------------------------------------------------------------------|-------|
| #1  | MeSH descriptor: [Vitamin D] explode all trees                                                                                                                                                                                                                                                                                                                                                                                                      | 5224  |
| #2  | MeSH descriptor: [Vitamin D Deficiency] this term only                                                                                                                                                                                                                                                                                                                                                                                              | 1226  |
| #3  | ((vitamin NEXT D?) or (vit NEXT D?) or (D NEXT vitamin?) or ergocalciferol or cholecalciferol or colecalciferol or calciferol or dihydroergocalciferol or sitocalciferol or dihydrotachysterol or dihydroxycholecalciferol? or hydroxycholecalciferol? or "25(OH)D" or "25(OH)D3" or 25OHD? or calcdiol or hydroxyergocalciferol or alfalcidol or alphacalcidol or "1,25(OH)2D" or (hydroxyvitamin NEXT D?) or (dihydroxyvitamin NEXT D?)):ti,ab,kw | 12959 |
| #4  | (paricalcitol or doxercalciferol or doxerocalciferol or calcifediol or calcitriol):ti,ab,kw                                                                                                                                                                                                                                                                                                                                                         | 2417  |
| #5  | hypovitaminosis NEXT D?                                                                                                                                                                                                                                                                                                                                                                                                                             | 303   |
| #6  | ((D OR D2 OR D3) NEAR/3 supplement*):ti,ab,kw                                                                                                                                                                                                                                                                                                                                                                                                       | 5632  |
| #7  | #1 or #2 or #3 or #4 or #5 or #6                                                                                                                                                                                                                                                                                                                                                                                                                    | 14461 |
| #8  | MeSH descriptor: [Coronavirus] this term only                                                                                                                                                                                                                                                                                                                                                                                                       | 2     |
| #9  | MeSH descriptor: [Betacoronavirus] this term only                                                                                                                                                                                                                                                                                                                                                                                                   | 2     |
| #10 | MeSH descriptor: [Betacoronavirus 1] this term only                                                                                                                                                                                                                                                                                                                                                                                                 | 0     |
| #11 | MeSH descriptor: [Coronavirus OC43, Human] this term only                                                                                                                                                                                                                                                                                                                                                                                           | 0     |
| #12 | MeSH descriptor: [Middle East Respiratory Syndrome Coronavirus] explode all trees                                                                                                                                                                                                                                                                                                                                                                   | 1     |

- 1  
2  
3 #13 MeSH descriptor: [SARS Virus] this term only 9  
4 #14 MeSH descriptor: [Coronavirus Infections] this term only 137  
5 #15 MeSH descriptor: [Severe Acute Respiratory Syndrome] this term only 107  
6 #16 (((corona\* or corono\*) near/1 (virus\* or viral\* or virinae\*)) or coronavirus\* or coronavirus\*  
7 or coronavirinae\* or Coronavirus\* or Coronavirus\* or Wuhan\* or Hubei\* or Huanan or "2019-nCoV"  
8 or 2019nCoV or nCoV2019 or "nCoV-2019" or "COVID-19" or COVID19 or "CORVID-19" or CORVID19  
9 or "WN-CoV" or WNCov or "HCoV-19" or HCoV19 or CoV or "2019 novel\*" or Ncov or "n-cov" or  
10 "SARS-CoV-2" or "SARSCoV-2" or "SARSCoV2" or "SARS-CoV2" or SARSCov19 or "SARS-Cov19" or  
11 "SARSCov-19" or "SARS-Cov-19" or Ncover or Ncorona\* or Ncorono\* or NcovWuhan\* or NcovHubei\*  
12 or NcovChina\* or NcovChinese\*):ti,ab,kw 616  
13 #17 ("severe acute respiratory syndrome" or SARS or "Middle East respiratory syndrome" or  
14 MERS):ti,ab,kw 351  
15 #18 (betacoronavirus\* or betacoronavirinae\*):ti,ab,kw 4  
16 #19 MeSH descriptor: [Respiratory Tract Infections] explode all trees 14360  
17 #20 (("acute respiratory" NEXT infection\*) or ("severe respiratory" NEXT infection\*) or ("acute  
18 respiratory tract" NEXT infection\*) or ("severe respiratory tract" NEXT infection\*) or influenza or  
19 "common cold" or pneumonia or bronchitis):ti,ab,kw 25944  
20 #21 #8 or #9 or #10 or #11 or #12 or #13 or #14 or #15 or #16 or #17 or #18 or #19 or #20  
21 32554  
22 #22 #7 and #21 329  
23  
24  
25  
26

27 CDSR: 3

### 28 Expert consultation

29 One additional study identified:

30  
31  
32  
33 Martineau AR, Jolliffe DA, Hooper RL, et al., (2017) Vitamin D supplementation to prevent acute  
34 respiratory tract infections: systematic review and meta-analysis of individual participant data. BMJ.  
35 2017;356:i6583. doi:10.1136/bmj.i6583  
36  
37  
38  
39  
40  
41  
42  
43  
44  
45  
46  
47  
48  
49  
50  
51  
52  
53  
54  
55  
56  
57  
58  
59  
60

2. Full details of the study eligibility criteria

| Include                                                                                                                                                                                                                                                                                                                                                                                                                                                                                                                                                                                                                                                                                                                                                                                                                                                                                                                                                                                                                                                                                                                                                                                                                                                                                                                                                                                                                                                                                                                                        | Exclude                                                                                                                                                                                                                 |
|------------------------------------------------------------------------------------------------------------------------------------------------------------------------------------------------------------------------------------------------------------------------------------------------------------------------------------------------------------------------------------------------------------------------------------------------------------------------------------------------------------------------------------------------------------------------------------------------------------------------------------------------------------------------------------------------------------------------------------------------------------------------------------------------------------------------------------------------------------------------------------------------------------------------------------------------------------------------------------------------------------------------------------------------------------------------------------------------------------------------------------------------------------------------------------------------------------------------------------------------------------------------------------------------------------------------------------------------------------------------------------------------------------------------------------------------------------------------------------------------------------------------------------------------|-------------------------------------------------------------------------------------------------------------------------------------------------------------------------------------------------------------------------|
| <p><b>P- Population</b></p> <ol style="list-style-type: none"> <li>1) Patients acutely ill with Betacoronavirus infection [SARS-CoV, MERS-CoV, SARS-CoV-2]</li> <li>2) or at risk of acute illness with Betacoronavirus infection</li> </ol> <p><b>I – Intervention/exposure</b></p> <ol style="list-style-type: none"> <li>1) Vitamin D supplementation</li> <li>2) Low Serum Vitamin D</li> </ol> <p><b>O - Outcomes</b></p> <ol style="list-style-type: none"> <li>1) Betacoronavirus infection (to include serological evidence of infection or clinically confirmed symptomatic infection);</li> <li>2) severity of Betacoronavirus infection (to include patients admitted to hospital or admitted to intensive care); mortality due to Betacoronavirus.</li> <li>3) Mortality due to Betacoronavirus</li> </ol> <p><b>C – Comparator</b></p> <ol style="list-style-type: none"> <li>1) No Vitamin D supplementation</li> <li>2) high or normal Serum Vitamin D</li> </ol> <p><b>S - Study design</b><br/>Randomised controlled trials and non-randomized studies will be eligible for inclusion in the review including, non randomized controlled trials, interrupted time series, controlled before-and-after studies, cohort studies, ecological studies, case reports and case series.</p> <p><b>Subgroups</b></p> <ol style="list-style-type: none"> <li>1. Ethnicity characteristics (White British, All Other White, Mixed, Asian, Black, Other)</li> <li>2. Age characteristics (population by five-year age groups)</li> </ol> | <p>Animals studies, modelling studies</p> <p>Qualitative studies, Non-primary research- reviews, editorials etc, guidelines and non-systematic reviews.</p> <p>Non-English language. Non peer reviewed publication.</p> |

### 3. List of studies excluded at full text review

|    | Excluded studies                                                                                                                                                                                                                                                                                                            | Reason                                                 |
|----|-----------------------------------------------------------------------------------------------------------------------------------------------------------------------------------------------------------------------------------------------------------------------------------------------------------------------------|--------------------------------------------------------|
| 1  | Adams, K. K., et al. (2020). "Myth Busters: Dietary Supplements and COVID-19." <u>Annals of Pharmacotherapy</u> : 1060028020928052.                                                                                                                                                                                         | Study design – commentary                              |
| 2  | Ahmed, I., et al. (2020). "First Covid-19 maternal mortality in the UK associated with thrombotic complications." <u>British Journal of Haematology</u> . <b>18</b> .                                                                                                                                                       | Study design – letter                                  |
| 3  | Alpalhao, M. and P. Filipe (2020). "SARS-CoV-2 pandemic and Vitamin D deficiency - a double trouble." <u>Photodermatology, Photoimmunology &amp; Photomedicine</u> <b>01</b> : 01.                                                                                                                                          | Study design – letter                                  |
| 4  | Annweiler, C., et al. (2020). COvid-19 and Vitamin D Supplementation: a Multicenter Randomized Controlled Trial of High Dose Versus Standard Dose Vitamin D3 in High-risk COVID-19 Patients (CoVitTrial). <a href="https://clinicaltrials.gov/show/NCT04344041">https://clinicaltrials.gov/show/NCT04344041</a> .           | Study design – on-going RCT completion date. July 2020 |
| 5  | Arya, A. and V. D. Dwivedi (2020). "Synergistic effect of vitamin D and remdesivir can fight COVID-19." <u>Journal of Biomolecular Structure &amp; Dynamics</u> : 1-2                                                                                                                                                       | Study design – letter                                  |
| 6  | Banerjee, D., et al. (2020). "COVID-19 infection in kidney transplant recipients." <u>Kidney International</u> <b>97</b> (6): 1076-1082.                                                                                                                                                                                    | Study design – commentary                              |
| 7  | Caccialanza, R., et al. (2020). Early nutritional supplementation in non-critically ill patients hospitalized for the 2019 novel coronavirus disease (COVID-19): Rationale and feasibility of a shared pragmatic protocol. <u>Nutrition</u> : 110835.                                                                       | Study design - protocol                                |
| 8  | Calder, P. C., et al. (2020). Optimal Nutritional Status for a Well-Functioning Immune System Is an Important Factor to Protect against Viral Infections. <u>Nutrients</u> : <b>12</b> (4), 1181.                                                                                                                           | Study design -narrative review                         |
| 9  | Cao, Z., et al. (2020). SARS-CoV-2 & Covid-19: Key-Roles of the 'Renin-Angiotensin' System / Vitamin D Impacting Drug and Vaccine Developments. <u>Infectious Disorders - Drug Targets</u> . (E-pub Ahead of Print) DOI : <a href="https://doi.org/10.2174/1871526520999200505174704">10.2174/1871526520999200505174704</a> | Study design – editorial                               |
| 10 | Carter, S. J., et al. (2020). Considerations for obesity, vitamin D, and physical activity amidst the COVID-19 pandemic. <u>Obesity</u> <b>16</b> : 16.                                                                                                                                                                     | Study design -narrative review                         |

|    |                                                                                                                                                                                                                                                                                                              |                                                  |
|----|--------------------------------------------------------------------------------------------------------------------------------------------------------------------------------------------------------------------------------------------------------------------------------------------------------------|--------------------------------------------------|
| 11 | Daneshkhan, A., et al. (2020). The Possible Role of Vitamin D in Suppressing Cytokine Storm and Associated Mortality in COVID-19 Patients. <u>medRxiv</u> . DOI: <a href="https://doi.org/10.1101/2020.04.08.20058578">https://doi.org/10.1101/2020.04.08.20058578</a>                                       | Study design – modelling                         |
| 12 | Davies G, Garami AR, Byers JC. Evidence Supports a Causal Model for Vitamin D in COVID-19 Outcomes. <u>medRxiv</u> , 2020. DOR: <a href="https://doi.org/10.1101/2020.05.01.20087965v3">https://doi.org/10.1101/2020.05.01.20087965v3</a>                                                                    | Study design – modelling                         |
| 13 | de Lucena, T. M. C., et al. (2020). "Mechanism of inflammatory response in associated comorbidities in COVID-19." <u>Diabetes &amp; Metabolic Syndrome</u> <b>14</b> (4): 597-600.                                                                                                                           | Study design -narrative review                   |
| 14 | Eroglu, C., et al. (2019). The relation between serum vitamin D levels, viral infections and severity of attacks in children with recurrent wheezing. <u>Allergologia et Immunopathologia</u> <b>47</b> (6): 591-597.                                                                                        | Population - Not COVID-19/SARs/MERs              |
| 15 | Faul, J. L., et al. (2020). "Vitamin d deficiency and ards after sars-cov-2 infection." <u>Irish Medical Journal</u> <b>113</b> (5).                                                                                                                                                                         | Study design – letter                            |
| 16 | Ghasemian, R., et al. (2020). "The Role of Vitamin D in The Age of COVID-19: A Systematic Review and Meta-Analysis Along with an Ecological Approach." <u>MedRxiv : the Preprint Server for Health Sciences</u> . DOI: <a href="https://doi.org/10.1101/2020.06.05.20123554">10.1101/2020.06.05.20123554</a> | Study design -narrative review                   |
| 17 | Grant, W. B., et al. (2020). Evidence that Vitamin D Supplementation Could Reduce Risk of Influenza and COVID-19 Infections and Deaths. <u>Nutrients</u> <b>12</b> (4): 02.                                                                                                                                  | Study design -narrative review                   |
| 18 | Heiser, K., et al. (2020). Identification of potential treatments for COVID-19 through artificial intelligence-enabled phenomic analysis of human cells infected with SARS-CoV-2. <u>bioRxiv</u> : 2020.2004.2021.054387.                                                                                    | Study design – modelling                         |
| 19 | Hribar, C. A., et al. (2020). "Potential Role of Vitamin D in the Elderly to Resist COVID-19 and to Slow Progression of Parkinson's Disease." <u>Brain Sciences</u> <b>10</b> (5): 08.                                                                                                                       | Study design -narrative review                   |
| 20 | Jakovac, H. (2020). COVID-19 and vitamin D-Is there a link and an opportunity for intervention? <u>American Journal of Physiology - Endocrinology &amp; Metabolism</u> <b>318</b> (5): E589-E589.                                                                                                            | Study design – letter                            |
| 21 | Jamaati, H., et al. (2020). A fourteen-day experience with coronavirus disease 2019 (COVID-19) induced acute respiratory distress syndrome (ARDS): An Iranian treatment protocol. <u>Iranian Journal of Pharmaceutical Research</u> <b>19</b> (1): 31-36.                                                    | Study design – treatment protocol/recommendation |
| 22 | Kalippurayil Moozhipurath, R., et al. (2020). "Evidence of Protective Role of Ultraviolet-B (UVB) Radiation in                                                                                                                                                                                               | Exposure – not vitamin D( UVB)                   |

|    |                                                                                                                                                                                                                                                                                                           |                                             |
|----|-----------------------------------------------------------------------------------------------------------------------------------------------------------------------------------------------------------------------------------------------------------------------------------------------------------|---------------------------------------------|
|    | Reducing COVID-19 Deaths." <u>MedRxiv : the Preprint Server for Health Sciences</u> .<br>DOI 10.1101/2020.05.06.20093419                                                                                                                                                                                  |                                             |
| 23 | Kara, M., et al. (2020). "'Scientific Strabismus' or Two Related Pandemics: COVID-19 & Vitamin D Deficiency." <u>British Journal of Nutrition</u> : 1-20.                                                                                                                                                 | Study design -narrative review              |
| 24 | Koivisto, O., et al. (2020). Key Vitamin D Target Genes with Functions in the Immune System. <u>Nutrients</u> , <b>12</b> (4):1140.                                                                                                                                                                       | Population - Outcomes - target genes        |
| 25 | Kow, C. S., et al. (2020). "Vitamin D Supplementation in Influenza and COVID-19 Infections Comment on: "Evidence that Vitamin D Supplementation Could Reduce Risk of Influenza and COVID-19 Infections and Deaths" <u>Nutrients</u> 2020, 12(4), 988." <u>Nutrients</u> <b>12</b> (6): 01.                | Study design – commentary                   |
| 26 | Kumar, V. and A. Srivastava (2020). "Spurious Correlation? A review of the relationship between Vitamin D and Covid-19 infection and mortality." <u>MedRxiv : the Preprint Server for Health Sciences</u> .<br>DOI: 10.1101/2020.05.25.20110338                                                           | Study design -narrative review              |
| 27 | Laird, E., et al. (2020). "Vitamin D and inflammation: Potential implications for severity of Covid-19." <u>Irish Medical Journal</u> <b>113</b> (5).                                                                                                                                                     | Study design -narrative review              |
| 28 | La Vignera, S., et al. (2020). Sex-Specific SARS-CoV-2 Mortality: Among Hormone-Modulated ACE2 Expression, Risk of Venous Thromboembolism and Hypovitaminosis D. <u>International journal of molecular sciences</u> <b>21</b> (8):2948.                                                                   | Study design – editorial                    |
| 29 | Li, A. Y., et al. (2020). Multivariate Analysis of Factors Affecting COVID-19 Case and Death Rate in U.S. Counties: The Significant Effects of Black Race and Temperature. <u>medRxiv</u> .<br>DOI: <a href="https://doi.org/10.1101/2020.04.17.20069708">https://doi.org/10.1101/2020.04.17.20069708</a> | Intervention – not Vitamin D                |
| 30 | Maestri, E., et al. (2020). Vitamin D and coronavirus: a new field of use?. <u>Recenti Progressi in Medicina</u> <b>111</b> (4): 253-256.                                                                                                                                                                 | Study design -narrative review, non-English |
| 31 | Mansbach, J. M. and C. A. Camargo Jr., (2009). Respiratory Viruses in Bronchiolitis and Their Link to Recurrent Wheezing and Asthma. <u>Clinics in Laboratory Medicine</u> <b>29</b> (4): 741-755.                                                                                                        | Population - Not COVID-19/SARs/MERs         |
| 32 | Marik, P. E., et al. (2020). Does vitamin D status impact mortality from SARS-CoV-2 infection? <u>Medicine in Drug Discovery</u> : 100041-100041.                                                                                                                                                         | Study design - commentary                   |
| 33 | McKenna, M. J. and M. A. T. Flynn (2020). "Covid-19, cocooning and vitamin d intake requirements." <u>Irish Medical Journal</u> <b>113</b> (5).                                                                                                                                                           | Study design -narrative review              |



|    |                                                                                                                                                                                                                                                     |                                               |
|----|-----------------------------------------------------------------------------------------------------------------------------------------------------------------------------------------------------------------------------------------------------|-----------------------------------------------|
| 34 | Mitchell, F. (2020). "Vitamin-D and COVID-19: do deficient risk a poorer outcome?" <u>The Lancet Diabetes &amp; Endocrinology</u> <b>20</b> : 20.                                                                                                   | Study design -narrative review                |
| 35 | Molloy, E. J. and N. Murphy (2020). Vitamin D, Covid-19 and Children. <u>Irish Medical Journal</u> <b>113</b> (4): 64.                                                                                                                              | Study design -narrative review                |
| 36 | McCartney, D. M. and D. G. Byrne (2020). Optimisation of Vitamin D Status for Enhanced Immuno-protection Against Covid-19. <u>Irish Medical Journal</u> <b>113</b> (4): 58.                                                                         | Study design -narrative review                |
| 37 | Rabbitt, L. and E. Slattery (2020). "Vitamin d and covid-19: A note of caution." <u>Irish Medical Journal</u> <b>113</b> (5).                                                                                                                       | Study design - letter                         |
| 38 | Ribeiro, H., et al. (2020). "Does Vitamin D play a role in the management of Covid-19 in Brazil?" <u>Revista de Saude Publica</u> <b>54</b> : 53.                                                                                                   | Study design -narrative review                |
| 39 | Romano, L., et al. (2020). "Short Report - Medical nutrition therapy for critically ill patients with COVID-19." <u>European Review for Medical and Pharmacological Sciences</u> <b>24</b> (7): 4035-4039.                                          | Study design -narrative review                |
| 40 | Silberstein, M. (2020). Vitamin D: A simpler alternative to tocilizumab for trial in COVID-19? <u>Medical Hypotheses</u> <b>140</b> : 109767-109767.                                                                                                | Study design -narrative review                |
| 41 | Speeckaert, M. M. and J. R. Delanghe (2020). "Association between low vitamin D and COVID-19: don't forget the vitamin D binding protein." <u>Aging Clinical &amp; Experimental Research</u> <b>28</b> : 28.                                        | Study design - letter                         |
| 42 | Skutsch, M., et al. (2020). "The association of UV with rates of COVID-19 transmission and deaths in Mexico: the possible mediating role of vitamin D." <u>MedRxiv : the Preprint Server for Health Sciences</u> . DOI: 10.1101/2020.05.25.20112805 | Study design – modelling                      |
| 43 | Suresh, P. S. (2020). "Hypovitaminosis D and COVID-19: Matter of Concern in India?" <u>Indian Journal of Clinical Biochemistry</u> .                                                                                                                | Study design - letter                         |
| 44 | Taghizadieh, A., et al. (2020). "Acute kidney injury in pregnant women following SARS-CoV-2 infection: A case report from Iran." <u>Respiratory Medicine Case Reports</u> <b>30</b>                                                                 | Exposure – not vitamin D                      |
| 45 | Tan, S. H. S., et al. (2020). "Medications in COVID-19 patients: summarizing the current literature from an orthopaedic perspective." <u>International Orthopaedics</u> <b>22</b> : 22.                                                             | Study design -narrative review                |
| 46 | Yalaki, Z., et al. (2019). Comparison of viral agents and vitamin D levels in children with acute bronchiolitis infection. <u>Cocuk Enfeksiyon Dergisi</u> <b>13</b> (1): e14-e20.                                                                  | Population - COVID-19/SARs/MERs not specified |
| 47 | Zabetakis, I., et al. (2020). "COVID-19: The Inflammation Link and the Role of Nutrition in Potential Mitigation." <u>Nutrients</u> <b>12</b> (5): 19.                                                                                              | Study design -narrative review                |



|    |                                                                                                                                          |                           |
|----|------------------------------------------------------------------------------------------------------------------------------------------|---------------------------|
| 48 | Zemb, P., et al. (2020). "Vitamin D deficiency and COVID-19 pandemic." <u>Journal of Global Antimicrobial Resistance</u> <b>28</b> : 28. | Study design - commentary |
|----|------------------------------------------------------------------------------------------------------------------------------------------|---------------------------|

#### 4. Articles included at full text, but later excluded at time of narrative synthesis

|    | Citation record                                                                                                                                                                                                                                                                                                                                                                                                      | Exclusion reason                                             | Update performed 8 <sup>th</sup> October 2020                                                                                                                                                                    |
|----|----------------------------------------------------------------------------------------------------------------------------------------------------------------------------------------------------------------------------------------------------------------------------------------------------------------------------------------------------------------------------------------------------------------------|--------------------------------------------------------------|------------------------------------------------------------------------------------------------------------------------------------------------------------------------------------------------------------------|
| 49 | Darling, A. L., et al. (2020). Vitamin D status, body mass index, ethnicity and COVID-19: Initial analysis of the first-reported UK Biobank COVID-19 positive cases (n 580) compared with negative controls (n 723). <u>medRxiv</u> .<br><br><a href="https://www.medrxiv.org/content/10.1101/2020.04.29.20084277v1?versioned=TRUE">https://www.medrxiv.org/content/10.1101/2020.04.29.20084277v1?versioned=TRUE</a> | Not peer reviewed publication at time of narrative synthesis | No update available                                                                                                                                                                                              |
| 50 | De Smet, D., et al. (2020). Vitamin D deficiency as risk factor for severe COVID-19: a convergence of two pandemics. <u>medRxiv</u> .<br><br><a href="https://www.medrxiv.org/content/10.1101/2020.05.01.20079376v2">https://www.medrxiv.org/content/10.1101/2020.05.01.20079376v2</a>                                                                                                                               | Not peer reviewed publication at time of narrative synthesis | No update available                                                                                                                                                                                              |
| 51 | Lau, F. H., et al. (2020). Vitamin D Insufficiency is Prevalent in Severe COVID-19. <u>medRxiv</u> .<br><br><a href="https://www.medrxiv.org/content/10.1101/2020.04.24.20075838v1?versioned=TRUE">https://www.medrxiv.org/content/10.1101/2020.04.24.20075838v1?versioned=TRUE</a>                                                                                                                                  | Not peer reviewed publication at time of narrative synthesis | No update available                                                                                                                                                                                              |
| 52 | Meltzer, D. O., et al. (2020). "Association of Vitamin D Deficiency and Treatment with COVID-19 Incidence." <u>MedRxiv : the Preprint Server for Health Sciences</u> <b>13</b> : 13.                                                                                                                                                                                                                                 | Not peer reviewed public                                     | An updated publication is available at <a href="https://jamanetwork.com/journals/jama-networkopen/fullarticle/2770157">https://jamanetwork.com/journals/jama-networkopen/fullarticle/2770157</a><br><br>Citation |

|    |                                                                                                                                                                                                                                                                                                                                                                                                                                                                                               |                                                              |                                                                                                                                                                                                                                                                                                                                                                                                                                                                                                                                                                                                                                                                                                                                                                                       |
|----|-----------------------------------------------------------------------------------------------------------------------------------------------------------------------------------------------------------------------------------------------------------------------------------------------------------------------------------------------------------------------------------------------------------------------------------------------------------------------------------------------|--------------------------------------------------------------|---------------------------------------------------------------------------------------------------------------------------------------------------------------------------------------------------------------------------------------------------------------------------------------------------------------------------------------------------------------------------------------------------------------------------------------------------------------------------------------------------------------------------------------------------------------------------------------------------------------------------------------------------------------------------------------------------------------------------------------------------------------------------------------|
|    | <a href="https://www.medrxiv.org/content/10.1101/2020.05.08.20095893v1">https://www.medrxiv.org/content/10.1101/2020.05.08.20095893v1</a>                                                                                                                                                                                                                                                                                                                                                     | ation at time of narrative synthesis                         | Meltzer DO, Best TJ, Zhang H, Vokes T, Arora V, Solway J. Association of Vitamin D Status and Other Clinical Characteristics With COVID-19 Test Results. <i>JAMA Netw Open</i> . 2020;3(9):e2019722. doi:10.1001/jamanetworkopen.2020.19722                                                                                                                                                                                                                                                                                                                                                                                                                                                                                                                                           |
| 53 | Notari, A. and G. Torrieri (2020). "COVID-19 transmission risk factors." <u>MedRxiv : the Preprint Server for Health Sciences</u> .<br><br><a href="https://www.medrxiv.org/content/10.1101/2020.05.08.20095083v1?versioned=TRUE">https://www.medrxiv.org/content/10.1101/2020.05.08.20095083v1?versioned=TRUE</a>                                                                                                                                                                            | Not peer reviewed publication at time of narrative synthesis | No update available                                                                                                                                                                                                                                                                                                                                                                                                                                                                                                                                                                                                                                                                                                                                                                   |
| 54 | Raisi-Estabragh, Z., et al. (2020). "Greater risk of severe COVID-19 in non-White ethnicities is not explained by cardiometabolic, socioeconomic, or behavioural factors, or by 25(OH)-vitamin D status: study of 1,326 cases from the UK Biobank." <u>MedRxiv : the Preprint Server for Health Sciences</u> .<br><br><a href="https://www.medrxiv.org/content/10.1101/2020.06.01.20118943v1?versioned=TRUE">https://www.medrxiv.org/content/10.1101/2020.06.01.20118943v1?versioned=TRUE</a> | Not peer reviewed publication at time of narrative synthesis | An updated publication is available at <a href="https://academic.oup.com/jpubhealth/article/42/3/451/5859581">https://academic.oup.com/jpubhealth/article/42/3/451/5859581</a><br><br>Citation<br>Zahra Raisi-Estabragh, Celeste McCracken, Mae S Bethell, Jackie Cooper, Cyrus Cooper, Mark J Caulfield, Patricia B Munroe, Nicholas C Harvey, Steffen E Petersen, Greater risk of severe COVID-19 in Black, Asian and Minority Ethnic populations is not explained by cardiometabolic, socioeconomic or behavioural factors, or by 25(OH)-vitamin D status: study of 1326 cases from the UK Biobank, <i>Journal of Public Health</i> , Volume 42, Issue 3, September 2020, Pages 451–460, <a href="https://doi.org/10.1093/pubmed/fda095">https://doi.org/10.1093/pubmed/fda095</a> |
| 55 | Tan, C. W., et al. (2020). "A cohort study to evaluate the effect of combination Vitamin D, Magnesium and Vitamin B12 (DMB) on progression to severe outcome in older COVID-19 patients." <u>MedRxiv : the Preprint Server for Health Sciences</u> .<br><br><a href="https://www.medrxiv.org/content/10.1101/2020.06.01.20112334v2">https://www.medrxiv.org/content/10.1101/2020.06.01.20112334v2</a>                                                                                         | Not peer reviewed publication at time of narrative synthesis | No update available                                                                                                                                                                                                                                                                                                                                                                                                                                                                                                                                                                                                                                                                                                                                                                   |

| Study details of the seven articles included at full text, but excluded at time of narrative synthesis |                                                                                           |                                                                                                                                                                                                                                                                                                                                                                                                                                                  |                                                                                                                                                                                      |                      |                                                                                                                                                                                                                                                                                                                                                                                                                                                                                                                                             |                                                                                                                                                                                                                        |
|--------------------------------------------------------------------------------------------------------|-------------------------------------------------------------------------------------------|--------------------------------------------------------------------------------------------------------------------------------------------------------------------------------------------------------------------------------------------------------------------------------------------------------------------------------------------------------------------------------------------------------------------------------------------------|--------------------------------------------------------------------------------------------------------------------------------------------------------------------------------------|----------------------|---------------------------------------------------------------------------------------------------------------------------------------------------------------------------------------------------------------------------------------------------------------------------------------------------------------------------------------------------------------------------------------------------------------------------------------------------------------------------------------------------------------------------------------------|------------------------------------------------------------------------------------------------------------------------------------------------------------------------------------------------------------------------|
| Study                                                                                                  | Design/<br>setting                                                                        | Population                                                                                                                                                                                                                                                                                                                                                                                                                                       | Exposure/Intervention                                                                                                                                                                | Outcomes             | Results                                                                                                                                                                                                                                                                                                                                                                                                                                                                                                                                     | Limitations                                                                                                                                                                                                            |
| Darling, A. L., et al. (2020) <sup>1</sup>                                                             | Retrospective cohort study<br><br>UK Biobank England cohort only                          | COVID-19 positive cases (n 580) Mean age 57.5 (SD 9.7)<br><br>COVID-19 negative controls (n 723) Mean age 57.9 (SD 8.7)                                                                                                                                                                                                                                                                                                                          | Serum 25(OH)D status Median (IQR) nmol/L<br><br>by gender (Male/Female), body mass index (Normal/underweight, overweight, obesity), ethnicity (Asian, Black, Mixed and Other, White) | COVID-19 test result | Serum 25(OH)D status similar in both groups:<br><br>COVID-19 positive cases (median IQR) = 43.3 (32.1) nmol/L)<br><br>COVID-19 negative controls (median (IQR) 44.1 (31.2) nmol/L) for COVID-19.<br><br>A logistic regression model suggests that being overweight (OR 1.51 CI 1.13-2.02) or obese (OR 1.67 CI 1.24-2.26); living in London (OR 1.45 CI 1.05-2.00); being male (OR 1.28 CI 1.01-1.61) and being of Asian, Black or Mixed ethnicity (OR 1.66 CI 1.08-2.54) is associated with a higher odds of testing positive for COVID-19 | UK Biobank baseline samples collected in 2006-2010.                                                                                                                                                                    |
| De Smet, D., et al. (2020) <sup>2</sup>                                                                | Retrospective observational study<br><br>Central network hospital, West Flanders, Belgium | 186 SARS-CoV-2 infected patients hospitalised from March 1, 2020 to April 7, 2020<br><br>(109 males [median age 68 years, IQR 53-79] 77 females [median age 71 years, IQR 65-74])<br><br>25(OH)D in COVID-19 patients was compared a control group of 2717 patients with similar age distribution, sampled from March 1, 2019 to April 30, 2019. (999 males [median age 69 years, IQR 53-81] and 1718 females [median age 68 years, IQR 43-83]). | 25(OH)D levels                                                                                                                                                                       | SARS-CoV-2 infection | COVID-19 patients had a lower median 25(OH)D on admission (18.6 ng/mL, IQR 12.6-25.3) than controls (21.5 ng/mL, IQR 13.9-20.8, P=0.0016) and a higher percentage of vitamin D deficiency (defined as 25(OH)D < 20ng/mL): 58.6% versus 45.2% (P=0.0005).<br><br>In male COVID-19 patients, vitamin D deficiency was lower median 25(OH)D (17.6 ng/mL, IQR 12.7-24.0 versus 20.3 ng/mL, IQR 13.7-28.3, P=0.0234) and a higher deficiency rate (67.0% versus 49.2%, P=0.0006) than male controls.                                             | The prevalence and age/sex/seasonal-distribution of vitamin D status was derived from the general population sampled from 16274 consecutive, unselected and unique patients from January 1, 2019 to December 31, 2019. |

|                                                  |                                                                                                                                           |                                                                                                                                                                                                                                                                                                                  |                                                                                                                                                                                                                                                                                                                                                                                                                                                                                                                                                  |                                      |                                                                                                                                                                                                                                                                                                                                                                                                                                                                                                                                                                                                                                                                                                                                                       |                                                                                                                                                                                                                                                                                       |
|--------------------------------------------------|-------------------------------------------------------------------------------------------------------------------------------------------|------------------------------------------------------------------------------------------------------------------------------------------------------------------------------------------------------------------------------------------------------------------------------------------------------------------|--------------------------------------------------------------------------------------------------------------------------------------------------------------------------------------------------------------------------------------------------------------------------------------------------------------------------------------------------------------------------------------------------------------------------------------------------------------------------------------------------------------------------------------------------|--------------------------------------|-------------------------------------------------------------------------------------------------------------------------------------------------------------------------------------------------------------------------------------------------------------------------------------------------------------------------------------------------------------------------------------------------------------------------------------------------------------------------------------------------------------------------------------------------------------------------------------------------------------------------------------------------------------------------------------------------------------------------------------------------------|---------------------------------------------------------------------------------------------------------------------------------------------------------------------------------------------------------------------------------------------------------------------------------------|
| <p>Lau, F. H., et al. (2020)<sup>3</sup></p>     | <p>Retrospective observational study</p> <p>A single, tertiary care academic (university) medical centre, Louisiana, New Orleans, USA</p> | <p>COVID-19 ICU patients (n 13)<br/>Mean age 61.5 (SD 15.7)</p> <p>COVID-19 floor patients (n 7)<br/>Mean age 72.0 (SD 14.8)</p> <p>Medical records of COVID-19 patients between March 27, 2020 and April 21, 2020</p> <p>Vitamin D insufficiency (VDI) and COVID-19 metrics in ICU vs. floor patients</p>       | <p>VDI: defined as serum 25(OH) D &lt; 30 ng/mL</p> <p>Serum 25(OH) D status Mean (SD) ng/mL</p> <p>by gender (Male/Female), body mass index (Normal, obesity), race (African American), age (elderly&gt;65 years), hypertension</p>                                                                                                                                                                                                                                                                                                             | <p>COVID-19 metrics</p>              | <p>Overall, few significant differences were identified between ICU and floor patients: Lactate dehydrogenase was significantly higher among ICU patients (441.8 vs. 223.0, P=0.001). Also, body mass index was significantly higher among ICU patients (35.2 vs. 24.5, P=0.02).</p> <p>Among ICU subjects, 11 (84.6%) had VDI, vs. 4 (57.1%) of floor subjects. 100% of ICU patients less than 75 years old had VDI (n=11). Among these, 64.6% (n=7) had critically low 25(OH) D (&lt;20 ng/mL) and 3 had &lt;10 ng/mL.</p> <p>VDI is highly prevalent in dark-skinned people (82.1% of African Americans vs. 41.6% overall).</p> <p>Male/Female ratio was 1.24 and 1.44 for COVID-19 and VDI respectively.</p>                                      | <p>Statistical analysis was limited by the small number of subjects.</p>                                                                                                                                                                                                              |
| <p>Meltzer, D. O., et al. (2020)<sup>4</sup></p> | <p>Retrospective cohort study</p> <p>University of Chicago Medicine, USA</p>                                                              | <p>4,314 patients tested for COVID-19 from 3/3/2020 to 4/10/2020. Among these, 499 had a vitamin D level in the year before testing.</p> <p>COVID-19 positive cases with vitamin D deficient (n 178)<br/>Mean age 45.6</p> <p>COVID-19 positive cases with not vitamin D deficient (n 321)<br/>Mean age 50.7</p> | <p>Vitamin D deficiency: defined by the most recent 25(OH) D &lt;20ng/ml or 1,25-dihydroxycholecalciferol &lt;18pg/ml within 1 year before COVID-19 testing. Treatment: defined by the most recent vitamin D type and dose, and treatment changes between the time of the most recent vitamin D level and time of COVID-19 testing</p> <p>Vitamin D deficiency and treatment changes were combined to categorize vitamin D status at the time of COVID-19 testing as:<br/>1) Likely deficient (last-level-deficient/treatment-not-increased)</p> | <p>Testing positive for COVID-19</p> | <p>In multivariable analysis, testing positive for COVID-19 was associated with increasing age (RR (age&lt;50)=1.05, P&lt;0.021; RR (age≥50)=1.02, P&lt;0.064), non-white race (RR=2.54, P&lt;0.01) and being likely vitamin D deficient (deficient/treatment-not-increased: RR=1.77, P&lt;0.02) as compared to likely vitamin D sufficient (not-deficient/treatment-not-decreased), with predicted COVID-19 rates in the vitamin D deficient group of 21.6% (95%CI [14.0%-29.2%] ) vs 12.2% (95%CI [8.9%-15.4%]) in the vitamin D sufficient group.</p> <p>Vitamin D deficiency declined with increasing vitamin D dose (especially of vitamin D3). Vitamin D dose was not significantly associated with testing positive for COVID-19 (P=0.18).</p> | <p>The associations observed might not reflect causal effects of vitamin D deficiency on COVID-19. This is because vitamin D deficiency can reflect a range of chronic health conditions or behavioural factors which plausibly decrease the likelihood of treatment of vitamin D</p> |

|                                                      |                                                                                  |                                                                                                                                                                                                                                                                                                                                                 |                                                                                                                                                                                                                                                                                                                                                                                                         |                                |                                                                                                                                                                                                                                                                                                                                                                                                                                                                                                                                                                                                                                                                                                                                                                                                                                                                                                                                                                                                                                                                                                                                                                                                                                                                                 |                                                                                                                                                                                                                                                                                                       |
|------------------------------------------------------|----------------------------------------------------------------------------------|-------------------------------------------------------------------------------------------------------------------------------------------------------------------------------------------------------------------------------------------------------------------------------------------------------------------------------------------------|---------------------------------------------------------------------------------------------------------------------------------------------------------------------------------------------------------------------------------------------------------------------------------------------------------------------------------------------------------------------------------------------------------|--------------------------------|---------------------------------------------------------------------------------------------------------------------------------------------------------------------------------------------------------------------------------------------------------------------------------------------------------------------------------------------------------------------------------------------------------------------------------------------------------------------------------------------------------------------------------------------------------------------------------------------------------------------------------------------------------------------------------------------------------------------------------------------------------------------------------------------------------------------------------------------------------------------------------------------------------------------------------------------------------------------------------------------------------------------------------------------------------------------------------------------------------------------------------------------------------------------------------------------------------------------------------------------------------------------------------|-------------------------------------------------------------------------------------------------------------------------------------------------------------------------------------------------------------------------------------------------------------------------------------------------------|
|                                                      |                                                                                  |                                                                                                                                                                                                                                                                                                                                                 | <p>2)Likely sufficient (last-level-not-deficient/treatment-not-decreased)<br/>3)Uncertain deficiency (last-level-deficient/treatment-increased or last-level-not-deficient/treatment-decreased)</p> <p>by age (&lt;50, ≥50), gender (Male/Female), race (White, other than White), ethnicity (Hispanic, not Hispanic), body mass index, employee status, comorbidity indicators (e.g. hypertension)</p> |                                |                                                                                                                                                                                                                                                                                                                                                                                                                                                                                                                                                                                                                                                                                                                                                                                                                                                                                                                                                                                                                                                                                                                                                                                                                                                                                 | deficiency and increase COVID-19 risk.                                                                                                                                                                                                                                                                |
| <p>Notari, A. and G. Torrieri (2020)<sup>5</sup></p> | <p>Correlational study</p> <p>126 countries, Only 50 countries for vitamin D</p> | <p>The number of cases follows in its early stages an almost exponential expansion. A starting point in each country was chosen: the first day di with 30 cases and fitted for 12 days. Thus, capturing the early exponential growth.</p> <p>Countries with too small total population (less than 300 thousands inhabitants) were excluded.</p> | <p>They analysed risk factors correlated with the initial transmission growth rate of COVID-19</p> <p>Average annual level of serum Vitamin D and the seasonal level</p> <p>The seasonal level is defined as: the amount during March or during winter for northern hemisphere, or during summer for southern hemisphere or the annual level for countries with little seasonal variation.</p>          | <p>Growth rate of COVID-19</p> | <p>They looked for linear correlations of the exponents with other variables, for a sample of 126 countries.</p> <p>They found a positive correlation, i.e. faster spread of COVID-19, with high confidence level with the following variables, with respective p-value: low Temperature (<math>4.10^{-7}</math>), high ratio of old vs. working-age people (<math>3.10^{-6}</math>), life expectancy (<math>8.10^{-6}</math>), number of international tourists (<math>1.10^{-5}</math>), earlier epidemic starting date di (<math>2.10^{-5}</math>), high level of physical contact in greeting habits (<math>6.10^{-5}</math>), lung cancer prevalence (<math>6.10^{-5}</math>), obesity in males (<math>1.10^{-4}</math>), share of population in urban areas (<math>2.10^{-4}</math>), cancer prevalence (<math>3.10^{-4}</math>), alcohol consumption (0.0019), daily smoking prevalence (0.0036), UV index (0.004, smaller sample, 73 countries), low Vitamin D serum levels (0.002-0.006, smaller sample, 50 countries). There is highly significant correlation also with blood type. Also, positive correlation with moderate CI (p-value of 0.02-0.03) with: CO2/SO emissions, type-1 diabetes in children, and low vaccination coverage for Tuberculosis (BCG).</p> | <p>The dataset for the annual vitamin D was built with the available literature, which is quite inhomogeneous.</p> <p>The dataset for the seasonal levels is more restricted. This is because the relative literature is less complete. So, for this the authors have included only 42 countries.</p> |

|                                                 |                                                                           |                                                                                                                                                                                                                                                                                |                                                                                                                                                                                                                                                                                                                                                                                                                                                                   |                                                                                                   |                                                                                                                                                                                                                                                                                                                                                                                                                                                                                                                                                                                                                                                    |                                                                                                                                                                                                                                                                                                            |
|-------------------------------------------------|---------------------------------------------------------------------------|--------------------------------------------------------------------------------------------------------------------------------------------------------------------------------------------------------------------------------------------------------------------------------|-------------------------------------------------------------------------------------------------------------------------------------------------------------------------------------------------------------------------------------------------------------------------------------------------------------------------------------------------------------------------------------------------------------------------------------------------------------------|---------------------------------------------------------------------------------------------------|----------------------------------------------------------------------------------------------------------------------------------------------------------------------------------------------------------------------------------------------------------------------------------------------------------------------------------------------------------------------------------------------------------------------------------------------------------------------------------------------------------------------------------------------------------------------------------------------------------------------------------------------------|------------------------------------------------------------------------------------------------------------------------------------------------------------------------------------------------------------------------------------------------------------------------------------------------------------|
|                                                 |                                                                           |                                                                                                                                                                                                                                                                                |                                                                                                                                                                                                                                                                                                                                                                                                                                                                   |                                                                                                   | Vitamin D is not highly correlated with UV index due to different food consumption in different countries.                                                                                                                                                                                                                                                                                                                                                                                                                                                                                                                                         |                                                                                                                                                                                                                                                                                                            |
| Raisi-Estabragh, Z., et al. (2020) <sup>6</sup> | Retrospective cohort study<br><br>UK Biobank                              | 4,510 UK participants tested for COVID-19.<br><br>Latest data release (29/05/2020) includes test results from 16/03/2020 to 18/05/2020.<br><br>COVID-19 positive cases (n 1,326) Mean age 68.11 (SD 9.23)<br><br>COVID-19 negative controls (n 3,184) Mean age 68.91 (SD 8.72) | Serum 25(OH) D levels nmol/L<br><br>Multivariate logistic regression models by age, gender (Male/Female), ethnicity (Caucasian (any White background) and non-Caucasian: Black, Asian, Chinese) to test whether addition of: 1) cardio metabolic factors (e.g. hypertension, body mass index); 2) 25(OH)-vitamin D; 3) poor diet; 4) Townsend deprivation score; 5) housing; or 6) behavioural factors attenuated sex/ethnicity associations with COVID-19 status | COVID-19 test result<br><br>Greater risk of severe COVID-19                                       | Over-representation of men and non-White ethnicities in the COVID-19 positive group.<br><br>Non-Whites had, on average, poorer cardio metabolic profile, lower 25(OH)-vitamin D, greater material deprivation, and were more likely to live in larger households and flats.<br><br>Male sex, non-White ethnicity, higher body mass index, Townsend deprivation score, and household overcrowding were independently associated with significantly greater odds of COVID-19. The pattern of association was consistent for men and women; cardio metabolic, socio-demographic and behavioural factors did not attenuate sex/ethnicity associations. | UK Biobank baseline samples collected in 2006-2010.<br><br>Aggregating all Black and Minority Ethnic (BAME) populations into one cohort might overlook important differences between non-Caucasian ethnicities.<br><br>The current dataset does not allow assessment of specific COVID-19 health outcomes. |
| Tan, C. W., et al. (2020) <sup>7</sup>          | Cohort observational study<br><br>A tertiary academic hospital, Singapore | All 43 consecutive hospitalized COVID-19 patients aged 50 and above.<br><br>Between 15 January and 15 April 2020.                                                                                                                                                              | DMB = a single daily oral dose of vitamin D3 1000 IU, magnesium 150mg and vitamin B12 500mcg for up to 14 days<br><br>Adjusted for age, gender and comorbidities                                                                                                                                                                                                                                                                                                  | Deterioration post-DMB administration leading to any form of oxygen therapy and/or intensive care | Duration of therapy: days, Median 5 (IQR 4-7)<br><br>Significantly fewer DMB patients than controls required initiation of oxygen therapy subsequently throughout their hospitalization (17.6% vs 61.5%, P=0.006).<br><br>On univariate analysis, increasing age and presence of comorbidities were associated                                                                                                                                                                                                                                                                                                                                     | Small sample size, and the lack of systematic biologic measures to support their findings.                                                                                                                                                                                                                 |

|  |  |                                                                                                                                                |  |                                      |                                                                                                                                                                                                                                                                                                                                                                                                                 |  |
|--|--|------------------------------------------------------------------------------------------------------------------------------------------------|--|--------------------------------------|-----------------------------------------------------------------------------------------------------------------------------------------------------------------------------------------------------------------------------------------------------------------------------------------------------------------------------------------------------------------------------------------------------------------|--|
|  |  | <p>17 patients received Vitamin D, Magnesium, Vitamin B12 (DMB): Mean age 58.4 (SD 7.0)</p> <p>26 patients did not: Mean age 64.1 (SD 7.9)</p> |  | <p>support for COVID-19 patients</p> | <p>with significantly higher OR for oxygen therapy, while exposure to DMB therapy was associated with a significantly improved OR 0.13 (95% CI: 0.03 – 0.59, P=0.008) .</p> <p>On multivariate analysis, increasing age was associated with significantly higher OR for oxygen therapy, while exposure to DMB therapy was associated with a significantly improved OR 0.15 (95% CI: 0.025 – 0.93, P=0.041).</p> |  |
|--|--|------------------------------------------------------------------------------------------------------------------------------------------------|--|--------------------------------------|-----------------------------------------------------------------------------------------------------------------------------------------------------------------------------------------------------------------------------------------------------------------------------------------------------------------------------------------------------------------------------------------------------------------|--|

For peer review only

1  
2  
3  
4  
5  
6  
7  
8  
9  
10  
11  
12  
13  
14  
15  
16  
17  
18  
19  
20  
21  
22  
23  
24  
25  
26  
27  
28  
29  
30  
31  
32  
33  
34  
35  
36  
37  
38  
39  
40  
41  
42  
43  
44  
45  
46



## 5. Risk of bias of included studies

Risk of bias assessment using the Downs and Black Checklist<sup>8</sup>

| Study                              | Quality score                                                                                                                                                                 | Reviewer notes                                                                                                                                                                                                                                                                                                                                                                                                                                                                                                                                                                                                                                                                                                                                                                                                                                                                                                         |
|------------------------------------|-------------------------------------------------------------------------------------------------------------------------------------------------------------------------------|------------------------------------------------------------------------------------------------------------------------------------------------------------------------------------------------------------------------------------------------------------------------------------------------------------------------------------------------------------------------------------------------------------------------------------------------------------------------------------------------------------------------------------------------------------------------------------------------------------------------------------------------------------------------------------------------------------------------------------------------------------------------------------------------------------------------------------------------------------------------------------------------------------------------|
| Hastie et al., 2020 <sup>9</sup>   | 14/20<br><br>Seven domains were not applicable and therefore not assessed, 2 reporting, 1 external validity 3 internal validity (bias) and 1 internal validity (confounding). | <p>The study could not be scored for 3 questions as we were unable to determine; 1) the representativeness of the subjects who were prepared to participate from entire population from which they were recruited, 2) whether losses to follow-up were taken into account as patients lost to follow-up were not reported and 3) whether the study had sufficient power to detect a clinically important effect.</p> <p>The study did not score a point for 3 questions; 1) providing the number and a description of the characteristics of patients lost to follow-up, 2) stating whether study subjects in different intervention groups we recruited over the same period of time and 3) for assignment concealment as it was a non-randomised study. The study scored partially (only 1 point not two) for clearly described distributions of principal confounders in each group of subjects to be compared.</p> |
| D'Avolio et al, 2020 <sup>10</sup> | 13/15<br><br>Twelve domains were not applicable therefore not assessed, 3 reporting, 1 external validity, 4 internal validity (bias) and 4 internal validity (confounding).   | <p>The study could not be scored for the 'power' domain as we were unable to determine from the article whether the study had sufficient power to detect a clinically important effect where the probability value for a difference being due to chance is less than 5%.</p> <p>The study did not score 1 point in the 'external validity' domain as those subjects who were prepared to participate were not representative of the entire population from which they were recruited.</p>                                                                                                                                                                                                                                                                                                                                                                                                                              |
| Fasano et al., 2020 <sup>11</sup>  | 12/17<br><br>Ten domains were not applicable therefore not assessed, 3 reporting, 1 external validity, 4 internal validity (bias) and 2 internal validity (confounding).      | <p>The study could not be scored for 4 items, the 'power' domain and one question in the 'Internal validity - confounding (selection bias)' as the study did not specify the time period over which patients were recruited. It could also not be scored for 2 questions in the 'External validity domain', 1) the representativeness of the subjects asked to participate in the study compared to the entire population from which they were recruited and 2) the representativeness of those subjects who were prepared to participate compared to the entire population from which they were recruited.</p> <p>The study did not score 1 point as the effect of the main confounders was not investigated or confounding was demonstrated but no adjustment was made in the final analyses. The study scored two points for presentation of potential confounders.</p>                                             |

|                                                                                                                                                                                                                                                                                                                                                                                                                                       |                                                                                                                                                                                        |                                                                                                                                                                                                                                                                                                                                                                                                                                                                                                                                                                                                                                                                                                                                                                                                                                                                                                                                                                                                                                                                                                                                                                                                                                                                                                                                                                                                                                                                                                                                                                                                                                                                                 |
|---------------------------------------------------------------------------------------------------------------------------------------------------------------------------------------------------------------------------------------------------------------------------------------------------------------------------------------------------------------------------------------------------------------------------------------|----------------------------------------------------------------------------------------------------------------------------------------------------------------------------------------|---------------------------------------------------------------------------------------------------------------------------------------------------------------------------------------------------------------------------------------------------------------------------------------------------------------------------------------------------------------------------------------------------------------------------------------------------------------------------------------------------------------------------------------------------------------------------------------------------------------------------------------------------------------------------------------------------------------------------------------------------------------------------------------------------------------------------------------------------------------------------------------------------------------------------------------------------------------------------------------------------------------------------------------------------------------------------------------------------------------------------------------------------------------------------------------------------------------------------------------------------------------------------------------------------------------------------------------------------------------------------------------------------------------------------------------------------------------------------------------------------------------------------------------------------------------------------------------------------------------------------------------------------------------------------------|
| Ilie et al., 2020 <sup>12</sup>                                                                                                                                                                                                                                                                                                                                                                                                       | 4/20<br>Seven domains were not applicable and therefore not assessed, 1 reporting, 1 external validity, 3 internal validity (bias), 1 internal validity (confounding) and 1 for power. | <p>The study could not be scored for 9 questions. Two in the 'reporting' domain, 1) interventions of interest not clearly described, 2) the main findings of the study are not clearly described. Two 'External validity' questions 1) the representativeness of the subjects asked to participate in the study compared to the entire population from which they were recruited and 2) the representativeness of those subjects who were prepared to participate compared to the entire population from which they were recruited. Two 'Internal validity – bias' domain questions 1) all analyses that had not been planned at the outset of the study were not clearly indicated (results of the study based on "data dredging", were not made clear), and 2) it was not clear if the statistical techniques used were appropriate to the data. Three 'Internal validity - confounding (selection bias)' domain questions, 1) no information provided concerning the source of patients included in the study 2) does not specify the time period over which patients were recruited, and 3) the numbers of patients lost to follow-up are not reported.</p> <p>The study did not score 7 points for the following; 3 reporting issues 1) no description of the characteristics of participants included in the study 2) no description of the distributions of principal confounders in each group of subjects to be compared, and 3) no description of the characteristics of patients lost to follow-up. Two internal validity bias issues 1) differences in follow-up were ignored and 2) no evidence that the main measure used were accurate (valid and reliable).</p> |
| <p><b>Note:</b> For each included study, the maximum possible quality score was dependent on which domains could be assessed based on the study design. The higher the score assigned to a study, the lower the risk of bias. For example, Hastie et al. 2020<sup>9</sup> was assigned a score of 14 out of a maximum possible score of 20, suggesting good quality and therefore low risk of bias compared to the other studies.</p> |                                                                                                                                                                                        |                                                                                                                                                                                                                                                                                                                                                                                                                                                                                                                                                                                                                                                                                                                                                                                                                                                                                                                                                                                                                                                                                                                                                                                                                                                                                                                                                                                                                                                                                                                                                                                                                                                                                 |

## References

1. Darling AL, Ahmadi KR, Ward KA, et al. Vitamin D status, body mass index, ethnicity and COVID-19: initial analysis of the first-reported UK Biobank COVID-19 positive cases (n 580) compared with negative controls (n 723). *medRxiv* 2020. doi: 10.1101/2020.04.29.20084277
2. De Smet D, De Smet K, Herroelen P, Gryspeerdt S, Martens GA. Vitamin D deficiency as risk factor for severe COVID-19: a convergence of two pandemics. *medRxiv* 2020. doi: 10.1101/2020.05.01.20079376
3. Lau FH, Majumder R, Torabi R, et al. Vitamin D insufficiency is prevalent in severe COVID-19. *medRxiv* 2020. doi: 10.1101/2020.04.24.20075838

- 1
- 2
- 3
- 4 4. Meltzer DO, Best TJ, Zhang H, Vokes T, Arora V, Solway J. Association of vitamin D
- 5 deficiency and treatment with COVID-19 incidence. *medRxiv* 2020. doi:
- 6 10.1101/2020.05.08.20095893
- 7
- 8 5. Notari A, Torrieri G. COVID-19 transmission risk factors. *medRxiv* 2020. doi:
- 9 10.1101/2020.05.08.20095083
- 10
- 11 6. Raisi-Estabragh Z, McCracken C, Bethell MS, et al. Greater risk of severe COVID-19 in non-
- 12 White ethnicities is not explained by cardiometabolic, socioeconomic, or behavioural
- 13 factors, or by 25(OH)-vitamin D status: study of 1,326 cases from the UK Biobank.
- 14 *medRxiv* 2020. doi: 10.1101/2020.06.01.20118943
- 15
- 16 7. Tan CW, Ho LP, Kalimuddin S, et al. A cohort study to evaluate the effect of combination
- 17 vitamin D, magnesium and vitamin B12 (DMB) on progression to severe outcome in
- 18 older COVID-19 patients. *medRxiv* 2020. doi: 10.1101/2020.06.01.20112334
- 19
- 20 8. Downs SH, Black N. The feasibility of creating a checklist for the assessment of the
- 21 methodological quality both of randomised and non-randomised studies of health
- 22 care interventions. *J Epidemiol Community Health* 1998;52(6):377-84. doi:
- 23 10.1136/jech.52.6.377
- 24
- 25 9. Hastie CE, Mackay DF, Ho F, et al. Vitamin D concentrations and COVID-19 infection in UK
- 26 Biobank. *Diabetes Metab Syndr* 2020;14(4):561-65. doi: 10.1016/j.dsx.2020.04.050
- 27
- 28 10. D'Avolio A, Avataneo V, Manca A, et al. 25-hydroxyvitamin D concentrations are lower in
- 29 patients with positive PCR for SARS-CoV-2. *Nutrients* 2020;12(5):1359. doi:
- 30 10.3390/nu12051359
- 31
- 32 11. Fasano A, Cereda E, Barichella M, et al. COVID-19 in Parkinson's Disease Patients Living
- 33 in Lombardy, Italy. *Mov Disord* 2020. doi: 10.1002/mds.28176
- 34
- 35 12. Ilie PC, Stefanescu S, Smith L. The role of vitamin D in the prevention of coronavirus
- 36 disease 2019 infection and mortality. *Aging Clin Exp Res* 2020. doi: 10.1007/s40520-
- 37 020-01570-8
- 38
- 39
- 40
- 41
- 42
- 43
- 44
- 45
- 46
- 47
- 48
- 49
- 50
- 51
- 52
- 53
- 54
- 55
- 56
- 57
- 58
- 59
- 60



# PRISMA 2009 Checklist

| Section/topic                      | #  | Checklist item                                                                                                                                                                                                                                                                                              | Reported on page #    |
|------------------------------------|----|-------------------------------------------------------------------------------------------------------------------------------------------------------------------------------------------------------------------------------------------------------------------------------------------------------------|-----------------------|
| <b>TITLE</b>                       |    |                                                                                                                                                                                                                                                                                                             |                       |
| Title                              | 1  | Identify the report as a systematic review, meta-analysis, or both.                                                                                                                                                                                                                                         | 1                     |
| <b>ABSTRACT</b>                    |    |                                                                                                                                                                                                                                                                                                             |                       |
| Structured summary                 | 2  | Provide a structured summary including, as applicable: background; objectives; data sources; study eligibility criteria, participants, and interventions; study appraisal and synthesis methods; results; limitations; conclusions and implications of key findings; systematic review registration number. | 3                     |
| <b>INTRODUCTION</b>                |    |                                                                                                                                                                                                                                                                                                             |                       |
| Rationale                          | 3  | Describe the rationale for the review in the context of what is already known.                                                                                                                                                                                                                              | 5                     |
| Objectives                         | 4  | Provide an explicit statement of questions being addressed with reference to participants, interventions, comparisons, outcomes, and study design (PICOS).                                                                                                                                                  | 6                     |
| <b>METHODS</b>                     |    |                                                                                                                                                                                                                                                                                                             |                       |
| Protocol and registration          | 5  | Indicate if a review protocol exists, if and where it can be accessed (e.g., Web address), and, if available, provide registration information including registration number.                                                                                                                               | 6                     |
| Eligibility criteria               | 6  | Specify study characteristics (e.g., PICOS, length of follow-up) and report characteristics (e.g., years considered, language, publication status) used as criteria for eligibility, giving rationale.                                                                                                      | 7                     |
| Information sources                | 7  | Describe all information sources (e.g., databases with dates of coverage, contact with study authors to identify additional studies) in the search and date last searched.                                                                                                                                  | 6                     |
| Search                             | 8  | Present full electronic search strategy for at least one database, including any limits used, such that it could be repeated.                                                                                                                                                                               | Supp appendix 1       |
| Study selection                    | 9  | State the process for selecting studies (i.e., screening, eligibility, included in systematic review, and, if applicable, included in the meta-analysis).                                                                                                                                                   | 7 and supp appendix 2 |
| Data collection process            | 10 | Describe method of data extraction from reports (e.g., piloted forms, independently, in duplicate) and any processes for obtaining and confirming data from investigators.                                                                                                                                  | 8                     |
| Data items                         | 11 | List and define all variables for which data were sought (e.g., PICOS, funding sources) and any assumptions and simplifications made.                                                                                                                                                                       | 8                     |
| Risk of bias in individual studies | 12 | Describe methods used for assessing risk of bias of individual studies (including specification of whether this was done at the study or outcome level), and how this information is to be used in any data synthesis.                                                                                      | 8                     |



# PRISMA 2009 Checklist

Page 1 of 2

|                      |    |                                                                                                                                                           |   |
|----------------------|----|-----------------------------------------------------------------------------------------------------------------------------------------------------------|---|
| Summary measures     | 13 | State the principal summary measures (e.g., risk ratio, difference in means).                                                                             | 8 |
| Synthesis of results | 14 | Describe the methods of handling data and combining results of studies, if done, including measures of consistency (e.g., $I^2$ ) for each meta-analysis. | 8 |

| Section/topic                 | #  | Checklist item                                                                                                                                                                                           | Reported on page #                  |
|-------------------------------|----|----------------------------------------------------------------------------------------------------------------------------------------------------------------------------------------------------------|-------------------------------------|
| Risk of bias across studies   | 15 | Specify any assessment of risk of bias that may affect the cumulative evidence (e.g., publication bias, selective reporting within studies).                                                             | n/a                                 |
| Additional analyses           | 16 | Describe methods of additional analyses (e.g., sensitivity or subgroup analyses, meta-regression), if done, indicating which were pre-specified.                                                         | 8                                   |
| <b>RESULTS</b>                |    |                                                                                                                                                                                                          |                                     |
| Study selection               | 17 | Give numbers of studies screened, assessed for eligibility, and included in the review, with reasons for exclusions at each stage, ideally with a flow diagram.                                          | 8                                   |
| Study characteristics         | 18 | For each study, present characteristics for which data were extracted (e.g., study size, PICOS, follow-up period) and provide the citations.                                                             | 8 and<br>supp<br>appendix<br>3      |
| Risk of bias within studies   | 19 | Present data on risk of bias of each study and, if available, any outcome level assessment (see item 12).                                                                                                | 8/9 supp<br>appendix<br>4           |
| Results of individual studies | 20 | For all outcomes considered (benefits or harms), present, for each study: (a) simple summary data for each intervention group (b) effect estimates and confidence intervals, ideally with a forest plot. | 8/9/10<br>and supp<br>appendix<br>3 |
| Synthesis of results          | 21 | Present results of each meta-analysis done, including confidence intervals and measures of consistency.                                                                                                  | n/a                                 |
| Risk of bias across studies   | 22 | Present results of any assessment of risk of bias across studies (see Item 15).                                                                                                                          | n/a                                 |
| Additional analysis           | 23 | Give results of additional analyses, if done (e.g., sensitivity or subgroup analyses, meta-regression [see Item 16]).                                                                                    | 10                                  |
| <b>DISCUSSION</b>             |    |                                                                                                                                                                                                          |                                     |
| Summary of evidence           | 24 | Summarize the main findings including the strength of evidence for each main outcome; consider their relevance to key groups (e.g., healthcare providers, users, and policy makers).                     | 11/12/13                            |
| Limitations                   | 25 | Discuss limitations at study and outcome level (e.g., risk of bias), and at review-level (e.g., incomplete retrieval of identified research, reporting bias).                                            | 13                                  |



# PRISMA 2009 Checklist

1  
2  
3  
4  
5  
6  
7  
8  
9  
10  
11  
12  
13  
14  
15  
16  
17  
18  
19  
20  
21  
22  
23  
24  
25  
26  
27  
28  
29  
30  
31  
32  
33  
34  
35  
36  
37  
38  
39  
40  
41  
42  
43  
44  
45  
46  
47

|                |    |                                                                                                                                            |       |
|----------------|----|--------------------------------------------------------------------------------------------------------------------------------------------|-------|
| Conclusions    | 26 | Provide a general interpretation of the results in the context of other evidence, and implications for future research.                    | 13/14 |
| <b>FUNDING</b> |    |                                                                                                                                            |       |
| Funding        | 27 | Describe sources of funding for the systematic review and other support (e.g., supply of data); role of funders for the systematic review. | 15    |

From: Moher D, Liberati A, Tetzlaff J, Altman DG, The PRISMA Group (2009). Preferred Reporting Items for Systematic Reviews and Meta-Analyses: The PRISMA Statement. PLoS Med 6(7): e1000097. doi:10.1371/journal.pmed1000097

For more information, visit: [www.prisma-statement.org](http://www.prisma-statement.org).

Page 2 of 2

# BMJ Open

## Association between vitamin D supplementation or serum vitamin D level and susceptibility to SARS-CoV-2 infection or COVID-19 including clinical course, morbidity and mortality outcomes? A systematic review.

|                                 |                                                                                                                                                                                                                                                                                                                                                                                                                                                                                                                                                                                                                                                                                                                                                                                                                                                                                                                                                                                        |
|---------------------------------|----------------------------------------------------------------------------------------------------------------------------------------------------------------------------------------------------------------------------------------------------------------------------------------------------------------------------------------------------------------------------------------------------------------------------------------------------------------------------------------------------------------------------------------------------------------------------------------------------------------------------------------------------------------------------------------------------------------------------------------------------------------------------------------------------------------------------------------------------------------------------------------------------------------------------------------------------------------------------------------|
| Journal:                        | <i>BMJ Open</i>                                                                                                                                                                                                                                                                                                                                                                                                                                                                                                                                                                                                                                                                                                                                                                                                                                                                                                                                                                        |
| Manuscript ID                   | bmjopen-2020-043737.R3                                                                                                                                                                                                                                                                                                                                                                                                                                                                                                                                                                                                                                                                                                                                                                                                                                                                                                                                                                 |
| Article Type:                   | Original research                                                                                                                                                                                                                                                                                                                                                                                                                                                                                                                                                                                                                                                                                                                                                                                                                                                                                                                                                                      |
| Date Submitted by the Author:   | 20-Apr-2021                                                                                                                                                                                                                                                                                                                                                                                                                                                                                                                                                                                                                                                                                                                                                                                                                                                                                                                                                                            |
| Complete List of Authors:       | Grove, Amy; Warwick Life Sciences, Division of Health Sciences, Warwick Medical School<br>Osokogu, Osemeke; University of Warwick, Warwick Medical School<br>Al-Khudairy, Lena; University of Warwick Warwick Medical School, Population, evidence and technology<br>Mehrabian, Amin; University of Warwick, Warwick Medical School; University of Medical Sciences, 2) Department of Pharmaceutical Nanotechnology<br>Zanganeh, Mandana; University of Warwick, Warwick Medical School<br>Brown, Anna; University of Warwick, Warwick Medical School<br>Court, Rachel; University of Warwick, Health Sciences<br>Taylor-Phillips, Sian; University of Warwick, Warwick Medical School<br>Uthman, Olalekan; University of Warwick, Warwick-Centre for Applied Health Research (WCAHRD)<br>McCarthy, Noel; University of Warwick, Warwick Medical School<br>Kumar, Sudhesh; University of Warwick, Medical School<br>Clarke, Aileen; University of Warwick, Division of Health Sciences |
| <b>Primary Subject Heading</b>: | Public health                                                                                                                                                                                                                                                                                                                                                                                                                                                                                                                                                                                                                                                                                                                                                                                                                                                                                                                                                                          |
| Secondary Subject Heading:      | Infectious diseases                                                                                                                                                                                                                                                                                                                                                                                                                                                                                                                                                                                                                                                                                                                                                                                                                                                                                                                                                                    |
| Keywords:                       | COVID-19, Public health < INFECTIOUS DISEASES, NUTRITION & DIETETICS                                                                                                                                                                                                                                                                                                                                                                                                                                                                                                                                                                                                                                                                                                                                                                                                                                                                                                                   |
|                                 |                                                                                                                                                                                                                                                                                                                                                                                                                                                                                                                                                                                                                                                                                                                                                                                                                                                                                                                                                                                        |

SCHOLARONE™  
Manuscripts





I, the Submitting Author has the right to grant and does grant on behalf of all authors of the Work (as defined in the below author licence), an exclusive licence and/or a non-exclusive licence for contributions from authors who are: i) UK Crown employees; ii) where BMJ has agreed a CC-BY licence shall apply, and/or iii) in accordance with the terms applicable for US Federal Government officers or employees acting as part of their official duties; on a worldwide, perpetual, irrevocable, royalty-free basis to BMJ Publishing Group Ltd ("BMJ") its licensees and where the relevant Journal is co-owned by BMJ to the co-owners of the Journal, to publish the Work in this journal and any other BMJ products and to exploit all rights, as set out in our [licence](#).

The Submitting Author accepts and understands that any supply made under these terms is made by BMJ to the Submitting Author unless you are acting as an employee on behalf of your employer or a postgraduate student of an affiliated institution which is paying any applicable article publishing charge ("APC") for Open Access articles. Where the Submitting Author wishes to make the Work available on an Open Access basis (and intends to pay the relevant APC), the terms of reuse of such Open Access shall be governed by a Creative Commons licence – details of these licences and which [Creative Commons](#) licence will apply to this Work are set out in our licence referred to above.

Other than as permitted in any relevant BMJ Author's Self Archiving Policies, I confirm this Work has not been accepted for publication elsewhere, is not being considered for publication elsewhere and does not duplicate material already published. I confirm all authors consent to publication of this Work and authorise the granting of this licence.

1  
2  
3 Title page  
4  
5

6 **Title**  
7

8  
9 Association between vitamin D supplementation or serum vitamin D level and susceptibility  
10 to SARS-CoV-2 infection or COVID-19 including clinical course, morbidity and mortality  
11 outcomes? A systematic review.  
12  
13

14 **Author's names**  
15

16  
17 Amy Grove (0000-0002-8027-7274), Osemeke Osokogu, Lena Al-Khudairy, Amin Mehrabian,  
18 Mandana Zanganeh, Anna Brown, Rachel Court, Sian Taylor-Phillips, Olalekan Uthman, Noel  
19 McCarthy, Sudhesh Kumar, Aileen Clarke (0000-0001-8299-3146).<sup>1</sup>  
20  
21

22  
23 **Address for each author**

24 **Author's names and positions**  
25

26  
27 1) Warwick Medical School, University of Warwick, Coventry, CV4 7AL, UK  
28  
29

30 Dr Amy Grove

31 Associate Professor of Health Technology Assessment and Implementation Science  
32  
33

34 Dr Osemeke Osokogu

35 Research Fellow  
36  
37

38 Dr Lena Al-Khudairy

39 Senior Research Fellow  
40  
41

42 Dr Mandana Zanganeh

43 Research Fellow  
44  
45

46 Mrs Anna Brown

47 Information Specialist  
48  
49

50 Mrs Rachel Court

51 Information Specialist  
52  
53

54 Professor Sian Taylor-Phillips

55 Professor of Population Health  
56  
57

58 Professor Olalekan Uthman  
59  
60

1  
2  
3 Professor of Evidence Synthesis

4 Professor Noel McCarthy

5 Professor of Public Health

6  
7  
8 Professor Sudhesh Kumar

9 Dean of Medicine

10  
11  
12 Professor Aileen Clarke

13 Professor of Public Health and Health Services Research

14  
15  
16  
17 2) Department of Pharmaceutical Nanotechnology, School of Pharmacy, Mashhad  
18 University of Medical Sciences, Mashhad, Iran

19  
20  
21 Mr Amin Mehrabian

22 Research Fellow

23  
24  
25 **Corresponding Author**

26  
27  
28 Dr Amy Grove, Room A101, Division of Health Sciences, Warwick Medical School, University  
29 of Warwick, Coventry, CV4 7AL

30 Email: [A.L.Grove@warwick.ac.uk](mailto:A.L.Grove@warwick.ac.uk)

## Abstract

Objective: To systemically review and critically appraise published studies of the association between vitamin D supplementation or serum vitamin D level and susceptibility to SARS-CoV-2 infection or COVID-19, including clinical course, morbidity and mortality outcomes.

Design: Systematic review.

Data sources: MEDLINE (OVID), Embase (OVID), Cochrane Central Register of Controlled Trials, MedRxiv and BioRxiv preprint databases. COVID-19 databases of the WHO, Cochrane, CEBM Oxford, and Bern University up to 10 June 2020.

Study selection: Studies which assessed Vitamin D supplementation and/or Low Serum Vitamin D in patients acutely ill with, or at risk of severe betacoronavirus infection (SARS-CoV, MERS-CoV, SARS-CoV-2).

Data extraction: Two authors independently extracted data using a predefined data extraction form and assessed risk of bias using the Downs and Black Quality Assessment Checklist.

Results: Searches elicited 449 papers, 59 studies were eligible full text assessment and four met the eligibility criteria of this review. The four studies were narratively synthesised and included: 1) a cross-sectional study (n=107) suggesting an inverse association between serum vitamin D and SARS-CoV-2, 2) a retrospective cohort study (348,598 participants, 449 cases) in which univariable analysis showed that vitamin D protects against COVID-19, 3) an ecological country level study demonstrating a negative correlation between vitamin D and COVID-19 case numbers and mortality, and 4) a case-control survey (n=1,486) showing cases with confirmed/probable COVID-19 reported lower vitamin D supplementation. All studies were at high/unclear risk of bias.

Conclusion: There is no robust evidence of a negative association between vitamin D and COVID-19. No relevant randomised control trials were identified and there is no robust peer reviewed published evidence of association between Vitamin D levels and severity of symptoms or mortality due to COVID-19. Guideline producers should acknowledge that benefits of vitamin D supplementation in COVID-19 are as yet unproven despite increasing interest.

### Strengths and limitations of this study

- The strengths of this systematic review include that it is reported in accordance with the Preferred Reporting Items for Systematic Reviews and Meta-Analyses (PRISMA) checklist.
- The review was conducted by two independent reviewers to ensure robustness of this work.
- We searched multiple living systematic review databases to enable us to capture publications in a fast moving field of research.
- The limitations of the study relate to the small amount of evidence available which was, at risk of bias and which limits the inferences that can be drawn.
- The review was restricted to the English language, therefore non English language papers may have been missed.

## Introduction

COVID-19, a novel viral infection caused by Severe Acute Respiratory Syndrome Coronavirus two (SARS-CoV-2) was declared a pandemic by The World Health Organization (WHO) on 11 March 2020.<sup>1</sup> Mild COVID-19 may manifest as high temperature, a continuous cough and a loss of or change in sense of smell or taste.<sup>2 3</sup> However, more severe and critical cases can result in inflammation of the lungs, low oxygen levels and acute respiratory distress syndrome.<sup>4</sup> Interest is mounting regarding the association of vitamin D supplementation or level with susceptibility to COVID-19 due to the recognised modulating effects of vitamin D on the immune system and immune response.

Vitamin D can modulate the immune system through highly expressed receptors in most non-skeletal tissues.<sup>5 6</sup> Two of the most common analogues of vitamin D which are found in food and used as a dietary supplement are D<sub>2</sub> (ergocalciferol) and D<sub>3</sub> (cholecalciferol, also made by the skin when exposed to sunlight).<sup>7</sup> Both D<sub>2</sub> and D<sub>3</sub> can be hydroxylated by liver enzymes CYP2R1 and CYP27A1 to form calcidiol (25(OH)D). The active metabolite of vitamin D, calcitriol (1 $\alpha$ ,25(OH)<sub>2</sub>D), results from the action of CYP27B enzyme on calcidiol. CYP27B is found in several tissues including the kidney, skin, bones, and immune system.<sup>8 9</sup> Tumour necrosis factor  $\alpha$  (TNF  $\alpha$ ) and interferon (IFN $\gamma$ ) are examples of inflammatory cytokines that stimulate the CYP27B enzymes of the immune system.<sup>10-20</sup> Vitamin D can interact with both the innate and cellular immune systems through these mechanisms.

Current Public Health England (PHE),<sup>21</sup> National Institutes of Health<sup>22</sup> and European Food Safety Authority<sup>23</sup> recommendations highlight the importance of vitamin D to population health. Vitamin D deficiency is defined as less than 25 nmol/L (10ng/ml) measured in blood serum.<sup>21</sup> UK guideline recommendations suggest that people take a supplement of 10 micrograms of vitamin D per day during the winter months or throughout the year if they do not spend time outdoors or if they cover the majority of their skin when outside.<sup>21</sup> Published editorials, journal commentaries<sup>24-29</sup> and news media reports<sup>30-32</sup> suggest that individuals with low blood serum concentrations of vitamin D might be at higher risk of infection with COVID-19, or upon infection have worse outcomes than individuals with normal/high serum vitamin D.<sup>33</sup>

Several observational studies have reported associations between low serum vitamin D and chronic<sup>34</sup> and acute conditions such as susceptibility to acute respiratory tract infections (RTI).<sup>35-37</sup> Most recently, Martineau and colleagues (2017) conducted a systematic review and meta-analysis of individual participant data from randomised controlled trials (RCTs) to assess the overall effect of vitamin D supplementation on risk of acute RTI.<sup>38</sup> They reported vitamin D supplementation to be safe while protecting against acute RTI overall (adjusted odds ratio 0.88, 95% confidence interval 0.81 to 0.96; P for heterogeneity <0.001). Patients very deficient in vitamin D benefited the most (adjusted odds ratio 0.75, 0.60 to 0.95; p for

1  
2  
3 interaction=0.006).<sup>38</sup> Critiques of this review have suggested that the findings should be  
4 interpreted as hypothesis generating only, as the results are heterogeneous and not  
5 sufficiently applicable to the general population.<sup>39</sup> Recent rapid reviews of vitamin D for  
6 treatment or prevention in COVID-19 reported no evidence that vitamin D deficiency  
7 predisposes to COVID-19, or that vitamin D supplementation is effective in prevention or  
8 treatment of COVID-19.<sup>40 41</sup> However, data sources included in the rapid review were  
9 limited.<sup>42</sup> Given the remaining uncertainty, it is timely to systematically review and critically  
10 appraise all peer reviewed published evidence to assess the association of vitamin D  
11 supplementation or level with susceptibility to COVID-19 including clinical course, morbidity  
12 and mortality outcomes.  
13  
14  
15  
16  
17  
18

## 19 **Methods**

### 20 Protocol registration

21  
22 The methods were prespecified in a protocol that was registered with the PROSPERO  
23 International Prospective Register of Systematic Reviews  
24 ([https://www.crd.york.ac.uk/prospero/display\\_record.php?ID=CRD42020182876](https://www.crd.york.ac.uk/prospero/display_record.php?ID=CRD42020182876)). Research  
25 ethics committee approval was not required for this study.  
26  
27  
28  
29

30 We undertook a systematic review to answer the following question: Is vitamin D  
31 supplementation or level associated with susceptibility to severe betacoronavirus infection  
32 (Severe Acute Respiratory Syndrome [SARS-CoV], Middle East Respiratory Syndrome  
33 [MERS-CoV], Severe Acute Respiratory Syndrome two [SARS-CoV-2]) including clinical course,  
34 morbidity and mortality outcomes?  
35  
36  
37

38 Our review was conceptualised and written in accordance with the PRISMA statement.<sup>43</sup>  
39  
40

### 41 Data sources and search

42 The search strategy was developed by the information specialists in collaboration with the  
43 research team and clinical advisors. We searched MEDLINE (OVID interface), Embase (OVID  
44 interface), Cochrane Central Register of Controlled Trials, MedRxiv and BioRxiv preprint  
45 databases on 6<sup>th</sup>-8<sup>th</sup> May 2020. We searched the global research on COVID-19 developed by  
46 the WHO,<sup>44</sup> CEBM Oxford,<sup>45</sup> and the living systematic review developed by Bern University<sup>46</sup>  
47 on 10 May 2020. We updated the database searches on 10<sup>th</sup> June 2020 to capture articles  
48 which may have been published since the initial search was conducted.  
49  
50  
51  
52

53 We searched additional resources including relevant systematic reviews (in MEDLINE [OVID  
54 interface], Embase [OVID interface] and Cochrane Database of Systematic Reviews, 19<sup>th</sup> May  
55 2020), relevant references and contacted experts for additional evidence. Our full search  
56 record is included in the supplementary information.  
57  
58  
59  
60



## Study eligibility

We developed pre-defined study eligibility criteria aligned to the research question (Table 1). We imposed a date restriction of January 2002, to capture all published articles since SARS-CoV was first discovered in Asia in February 2003.<sup>47</sup> We limited to English language only.

Table 1. Study eligibility criteria

| <i>Study eligibility criteria</i>                                                                                                                                                                                                                                                                                                                                                                                         |
|---------------------------------------------------------------------------------------------------------------------------------------------------------------------------------------------------------------------------------------------------------------------------------------------------------------------------------------------------------------------------------------------------------------------------|
| <p>P - Population</p> <ol style="list-style-type: none"> <li>1) Patients acutely ill with betacoronavirus infection [SARS-CoV, MERS-CoV, SARS-CoV-2]</li> <li>2) or at risk of acute illness with betacoronavirus infection</li> </ol>                                                                                                                                                                                    |
| <p>I - Intervention/exposure</p> <ol style="list-style-type: none"> <li>1) Vitamin D supplementation</li> <li>2) Low Serum vitamin D</li> </ol>                                                                                                                                                                                                                                                                           |
| <p>O - Outcomes</p> <ol style="list-style-type: none"> <li>1) Betacoronavirus infection (to include serological evidence of infection or clinically confirmed symptomatic infection);</li> <li>2) Severe betacoronavirus infection (to include patients admitted to hospital or admitted to intensive care); mortality due to betacoronavirus infection</li> <li>3) Mortality due to betacoronavirus infection</li> </ol> |
| <p>C – Comparators</p> <ol style="list-style-type: none"> <li>1) No vitamin D supplementation</li> <li>2) High or normal serum vitamin D</li> </ol>                                                                                                                                                                                                                                                                       |
| <p>S - Study design</p> <p>Peer reviewed publications of randomised controlled trials and non-randomised studies were eligible for inclusion; including, non randomised controlled trials, interrupted time series analyses, controlled before-and-after studies, cohort studies, ecological studies, case reports and case series.</p>                                                                                   |
| <p>Subgroups</p> <ol style="list-style-type: none"> <li>1. Ethnicity characteristics (White British, all other White, Mixed, Asian, Black, Other)</li> <li>2. Age characteristics (population by five-year age groups)</li> </ol>                                                                                                                                                                                         |

## Article selection

Following the article search, we systematically identified and removed any duplicate citations using EndNote X9 software. Using titles and abstracts, de-duplicated citations were screened by two independent reviewers (OO, MZ, AM, AG) and checked by a third (AC). All articles deemed ineligible were excluded at this stage. We identified and obtained all remaining articles for full text screening, which was performed independently by at least two reviewers against the pre-specified eligibility criteria (Table 1). Where disagreements regarding the inclusion of articles arose, a third reviewer (AC) was consulted to reach a final decision.

### Data extraction

Two reviewers independently (LAK, MZ, OO, AM) extracted data from eligible full-text papers using a prespecified data extraction form. The accuracy of all the data extraction was independently assessed by a third reviewer (AG). Where reported, we sought to extract data from each article relevant to the research question, including details of population, intervention/exposure, comparator, outcomes and any detail related to the two pre-specified subgroups: ethnicity characteristics and age characteristics. Disagreements between reviewers were resolved by discussion and agreement, or via consultation with a third reviewer (AC).

### Risk of bias

The included studies had observational study designs aimed at answering a specific question. Therefore, risk of bias of included full-text papers was assessed using the Downs and Black Quality Assessment Checklist.<sup>48</sup> Two reviewers (AM, MZ, OO) independently assessed the risk of bias of the included studies and the accuracy of the assessment was evaluated by a third reviewer (LAK).

### Data analysis

We anticipated that identified studies would be too heterogeneous to facilitate pooling of study data and planned a narrative synthesis. Nevertheless, we intended to consider pooling outcomes data in a meta-analysis using a random-effects model if appropriate.

### Patient and public involvement

Due to the rapid timeframe of this systematic review it was not possible for our research team to involve patients or the public in the design, conduct, or reporting of our study.

### Results

After searching databases, assessing the reference lists of 17 narrative reviews<sup>27 28 33 49-62</sup> and one additional article identified through consultation with clinical experts,<sup>38</sup> we identified 499 citations. Following removal of duplicates and screening of titles and abstracts, we retrieved 59 full-text papers of which four met the full eligibility criteria (see **Error! Reference source not found.**). The electronic supplement includes a list of reasons for excluding studies at full text review. Seven articles closely met the eligibility criteria but were excluded as they were not available as peer reviewed publications at the time of our narrative synthesis, details of these seven studies<sup>63-69</sup> is provided in the electronic supplement.

<Figure 1 approximatley here >

1  
2  
3  
4 The characteristics of the four included studies are presented in  
5  
6  
7  
8  
9  
10  
11  
12  
13  
14  
15  
16  
17  
18  
19  
20  
21  
22  
23  
24  
25  
26  
27  
28  
29  
30  
31  
32  
33  
34  
35  
36  
37  
38  
39  
40  
41  
42  
43  
44  
45  
46  
47  
48  
49  
50  
51  
52  
53  
54  
55  
56  
57  
58  
59  
60

For peer review only

1  
2  
3 Table 2. All four included studies were conducted in Europe and published in April or May  
4 2020. One study was based on data from UK residents exclusively,<sup>70</sup> another included data  
5 on residents in 20 European countries, including the UK.<sup>71</sup> The studies were observational  
6 design and no relevant RCT were identified or included in the review. All four studies were  
7 at high or unclear risk of bias and scored poorly across several domains of the Downs and  
8 Black Quality Assessment Checklist,<sup>48</sup> including external validity, internal validity and power.  
9 A prominent issue amongst the included studies was that the authors did not perform  
10 adequate multivariable adjustment to correct for confounding.<sup>72 73 74</sup> Ecological bias was  
11 present in Ilie et al., 2020<sup>71</sup> which may result from spatial and temporal scale differences  
12 between country level mean levels of vitamin D. However, several domains in each risk of  
13 bias assessment were not applicable or not reported and therefore, could not be scored  
14 using the Downs and Black Quality Assessment Checklist.<sup>48</sup> Detailed risk of bias scores are  
15 provided in the electronic supplement.  
16  
17  
18  
19  
20  
21  
22  
23  
24  
25  
26  
27  
28  
29  
30  
31  
32  
33  
34  
35  
36  
37  
38  
39  
40  
41  
42  
43  
44  
45  
46  
47  
48  
49  
50  
51  
52  
53  
54  
55  
56  
57  
58  
59  
60

Table 2. Characteristics of the four included studies

| Study                              | Design/Setting                                                                        | Population                                                   | Exposure/Intervention                                                                                                                                                      | Outcomes                                               | Results                                                                                                                                                                                                                                                                                                                          | Limitations                                                                                                                                                                                                                                           |
|------------------------------------|---------------------------------------------------------------------------------------|--------------------------------------------------------------|----------------------------------------------------------------------------------------------------------------------------------------------------------------------------|--------------------------------------------------------|----------------------------------------------------------------------------------------------------------------------------------------------------------------------------------------------------------------------------------------------------------------------------------------------------------------------------------|-------------------------------------------------------------------------------------------------------------------------------------------------------------------------------------------------------------------------------------------------------|
| <b>Serum vitamin D</b>             |                                                                                       |                                                              |                                                                                                                                                                            |                                                        |                                                                                                                                                                                                                                                                                                                                  |                                                                                                                                                                                                                                                       |
| D'Avolio et al. 2020 <sup>73</sup> | Cross-sectional study<br>Canton of Tessin, Switzerland                                | 107 patients with data on SARS-CoV-2 and 25(OH)D measurement | Vitamin D analysis, conducted within seven weeks of the SARS-CoV-2 polymerase chain reaction (PCR) result<br><br>Control patients with 25(OH)D data during the same period | SARS-CoV-2 infection                                   | Group 1 comprised 27 patients with positive PCR test results for SARS-CoV-2 while group 2 comprised 80 patients with a negative PCR result for SARS-CoV-2<br><br>Significantly lower 25(OH)D levels (p = 0.004) in SARS-CoV-2 patients even after stratifying patients according to age >70 years                                | Few patients from a single hospital<br><br>No available clinical information about the severity of COVID-19 symptoms<br><br>No data on other potential confounding variable<br><br>SARS-CoV-2 and the 25(OH)D status were performed on different days |
| Hastie et al. 2020 <sup>70</sup>   | Retrospective cohort study<br>UK Biobank Cohort including England, Scotland and Wales | 502,624 participants aged 37-73 years between 2006 and 2010  | Biochemical assay of 25(OH)D, a measure of vitamin D status<br><br>Vitamin D was imputed if it was below or above the limit of detection                                   | Confirmed COVID-19 (at least one positive test result) | Complete data on 348,598 UK Biobank participants<br><br>449 had confirmed COVID-19. Of these, 385 (85.8%) were White compared to 64 (14.2%) non-White (Black, South Asian and others)<br><br>Vitamin D was associated with COVID-19 univariably but not after adjustment for confounders. Ethnicity was associated with COVID-19 | UK Biobank is not representative of the general population<br><br>Baseline measurements, including 25(OH)D concentration and health status, were obtained a decade prior to conduct of the study                                                      |

1  
2  
3  
4  
5  
6  
7  
8  
9  
10  
11  
12  
13  
14  
15  
16  
17  
18  
19  
20  
21  
22  
23  
24  
25  
26  
27  
28  
29  
30  
31  
32  
33  
34  
35  
36  
37  
38  
39  
40  
41  
42  
43  
44  
45  
46

|                                  |                                                                        |                                                                                                            |                                          |                                                                                                                 |                                                                                                                                                           |                                                                                                                                                                                                                                                                             |
|----------------------------------|------------------------------------------------------------------------|------------------------------------------------------------------------------------------------------------|------------------------------------------|-----------------------------------------------------------------------------------------------------------------|-----------------------------------------------------------------------------------------------------------------------------------------------------------|-----------------------------------------------------------------------------------------------------------------------------------------------------------------------------------------------------------------------------------------------------------------------------|
| Ilie et al. 2020 <sup>71</sup>   | Ecological study<br>20 European countries                              | Population of 20 included European countries                                                               | Mean levels of vitamin D in each country | Cases of COVID-19 per 1 million population in each country<br><br>Deaths from COVID-19 per 1 million population | Negative correlations between mean levels of vitamin D and the number of COVID-19 cases per 1 million, and mortality per 1 million                        | The number of cases per country is affected by the number of tests performed and by the different measures taken by each country to prevent the spread of infection                                                                                                         |
| <b>Vitamin D supplementation</b> |                                                                        |                                                                                                            |                                          |                                                                                                                 |                                                                                                                                                           |                                                                                                                                                                                                                                                                             |
| Fasano et al. 2020 <sup>74</sup> | Case-control survey<br><br>A single tertiary centre in Lombardy, Italy | 1,486 Parkinson's disease (PD) patients were included in the survey<br><br>1,207 family members (controls) | Vitamin D                                | 'Confirmed' or 'probable' diagnosis of COVID-19                                                                 | 12.4% of PD patients with confirmed or probable COVID-19 had been taking vitamin D<br><br>22.9% of PD patients without COVID-19 had been taking vitamin D | Well-known limitation of a telephone survey<br><br>Community-dwelling PD patients<br><br>Some patients could not be reached possibly due to death from COVID-19<br><br>COVID-19 diagnosis could not be confirmed in many cases<br><br>Younger age of non- PD COVID-19 cases |

### Serum vitamin D

D'Avolio et al., 2020<sup>73</sup> used a cross sectional design with data on nasopharyngeal swab polymerase chain reaction (PCR) analysis for SARS-CoV-2 and a 25(OH)D measurement taken from patients between 1st March and 14th April 2020. PCR positives (median age = 74 years [IQR 65–81]; male = 70.4%) had significantly ( $P = 0.004$ ) lower serum 25(OH)D levels (median = 11.1 ng/mL [IQR 8.2–21.0]) than PCR negatives (median age = 73 years [IQR 61–82]; male = 48.8%; median 25(OH)D = 24.6 ng/mL [IQR 8.9–30.5]). Although gender and age stratified analysis showed no significant differences, older (>70 years) SARS-CoV-2 positive ( $n=18$ ) participants had significantly lower median serum 25 (OH) D levels (9.3 ng/mL [IQR 8.1–19.9]) than older SARS-CoV-2 negatives ( $n=43$ ) (23.1 ng/mL [IQR 8.5–31.7]) ( $P = 0.037$ ).

Hastie et al., 2020<sup>70</sup> is a retrospective cohort study that utilised data from the UK Biobank,<sup>72</sup> using data from 348,598 people with complete information on vitamin D and covariates; 449 people tested positive for COVID-19. COVID-19 positives were older (Median = 49 years; Interquartile Range [IQR] = 40-58) than COVID-19 negatives (Median = 49 years; IQR = 38 - 57) with  $p$ -value of <0.05. Multivariable analysis showed that age at assessment (OR = 1.02; 95% CI = 1.00 - 1.03;  $P = 0.016$ ) and non-White ethnicity (Black OR = 4.30, 95% CI = 2.92 - 6.31,  $P = < 0.001$ ; South Asian OR = 2.42, 95% CI = 1.50 - 3.93,  $P = < 0.001$ ) were associated with confirmed COVID-19. There was no significant interaction between ethnicity and vitamin D deficiency (OR = 0.90; 95% CI = 0.66 - 1.23;  $P = 0.515$ ). Median vitamin D concentration at recruitment was lower for people with subsequent confirmed COVID-19 (28.7 [IQR 10.0-43.8] nmol/l) than for other participants (32.7 [IQR 10.0-47.2] nmol/l) ( $P = < 0.01$ ). Although univariable analysis suggested an association between vitamin D and COVID-19 (OR=0.99; 95% CI 0.99 – 0.999;  $P = 0.013$ ), this association became insignificant (OR=1.00; 95% CI = 0.998-1.01;  $P = 0.208$ ) after adjustment for covariates.<sup>70</sup>

Ilie et al., 2020<sup>71</sup> used an ecological study design reporting on 20 European countries as at 8th April 2020; the data pertains to mean levels of vitamin D, cases of COVID-19 per million population and deaths from COVID-19 per million population. The authors performed Pearson Correlation Coefficient Calculations and reported a negative correlation between mean levels of vitamin D (Mean 56.79 nmol/l, SD 10.61) and numbers of cases of COVID-19 per million population in each country (Mean cases 1393.4, SD 1129.984,  $r(20) = -0.44$ ;  $P = 0.05$ ). Additionally, a negative correlation was reported between mean vitamin D levels and the number of deaths caused by COVID-19 per million population in each country (Mean 80.42, SD 94.61,  $r(20) = -0.4378$ ;  $P = 0.05$ ). Sweden had the highest mean level of vitamin D (73.5 nmol/l) compared to Spain which had a mean level of 42.5 nmol/l). The number of cases of COVID-19 per million population was 834 in Sweden and 3,137 in Spain. Likewise, at the time of the study, there were 68 deaths from COVID-19 per million population in Sweden and 314 in Spain.

### Vitamin D supplementation

Fasano et al., 2020<sup>74</sup> investigated patients in a case-control phone survey in Lombardy, Italy. COVID-19 diagnosis was confirmed using a nasopharyngeal swab or probable based on : a) presence of persistent COVID-19-related symptoms ( $\geq 3$  including fever or  $\geq 5$  without fever); or b)  $\geq 1$  symptom in presence of suggestive chest radiologic signs; and/or c) living with a family member with a confirmed diagnosis of COVID-19. 1,486 participants were included in the survey (32 confirmed COVID-19, 73 probable COVID-19 and 1,381 unaffected). Confirmed/probable COVID-19 cases (mean age = 70.5 [Standard Deviation [SD] = 10.1]; male = 53%) self-reported a significantly lower intake of vitamin D supplementation (12.4%) compared to unaffected cases (22.9%; mean age = 73.0 [SD = 9.5], male = 57%). The age-adjusted OR (OR 0.56 [95% CI = 0.32-0.99], P= 0.048) suggested a protective effect of vitamin D intake.

### Subgroup evaluation

We planned to perform subgroup analyses by age and ethnicity. According to Hastie et al., 2020<sup>70</sup> multivariable analysis showed that age at assessment (OR = 1.02; 95% CI = 1.00 - 1.03; P= 0.016) and non-White ethnicity (Black OR = 4.30, 95% CI = 2.92 - 6.31, P= < 0.001; South Asians OR = 2.42, 95% CI = 1.50 - 3.93, P= <0.001) were associated with confirmed COVID-19. However, Hastie et al found no significant interaction between ethnicity and vitamin D deficiency (OR = 0.90; 95% CI = 0.66 - 1.23; P= 0.515).

### Discussion

This systematic review of non-randomised studies has shown no robust evidence of an association between vitamin D and COVID-19. We identified four studies for inclusion in a narrative synthesis which were all at high or unclear risk of bias. A univariable analysis of data from the UK Biobank database revealed an association between vitamin D and COVID-19 (OR=0.99; 95% CI 0.99 – 0.999; P=0.013). However, this association became insignificant (OR=1.00; 95% CI=0.998-1.01; P=0.208) after adjustment for 13 other covariates, suggesting that the initial association was due to one or more confounding variables.<sup>70</sup> This view is further strengthened by the demonstration of highly significant associations between age and ethnicity characteristics as predictor variables, and COVID-19 as the outcome variable. Overall, the UK Biobank study showed no effect, however it should be noted that the UK Biobank data included only one measurement of Vitamin D levels taken between 10 and 14 years prior to the outbreak of COVID-19. This is a significant study limitation.

Liu et al., 2020<sup>75</sup> concluded that patients over 60 years experienced more severe manifestations and had longer disease courses of COVID-19 compared to patients below 60 years.<sup>75</sup> And other studies have shown that older (rather than younger) people are more likely to die from COVID-19.<sup>76-79</sup>



1  
2  
3 Non-White people are known to be more susceptible to COVID-19 and tend to develop worse  
4 outcomes,<sup>80</sup> a finding that our review has further substantiated.<sup>70</sup> Ethnicity is a multi-faceted  
5 construct that includes genetic make-up, socio-cultural identity and behavioural patterns.<sup>81</sup> It  
6 has been shown to be associated with differing susceptibility and treatment outcomes in a  
7 number of diseases.<sup>82 83 84</sup> Hastie et al., 2020<sup>70</sup> did not find any interaction between ethnicity  
8 and vitamin D deficiency and although Ilie et al 2020<sup>71</sup> identified a relationship, the study is  
9 subject to ecological bias. Ilie et al 2020<sup>71</sup> compared vitamin D levels and rates of COVID-19  
10 across 20 European countries, and therefore many relevant factors were not accounted for in  
11 the analysis. Given the findings so far from our review we consider that there is paucity of  
12 data on vitamin D levels and morbidity and mortality from COVID-19 and there is no evidence  
13 from RCTs on outcomes of vitamin D supplementation on severity of symptoms or mortality  
14 to date. However a relationship between ethnicity, vitamin D (serum levels or  
15 supplementation) and susceptibility to or severity of COVID-19 cannot yet be ruled out.

16  
17  
18  
19  
20  
21  
22  
23 Risk of bias assessments demonstrate that all studies were at high or unclear risk of bias. All  
24 studies were observational designs and therefore subject to confounding. The persistent calls  
25 for high-dose vitamin D supplementation<sup>85</sup> arise from speculation about presumed  
26 mechanisms.<sup>86 87</sup> Our systematic review found no robust evidence that low levels of Vitamin  
27 D are associated with an increased likelihood of COVID-19. More robust prognostic studies  
28 could be combined in a systematic review where a prognostic factor research question is  
29 phrased, and considerations of participation, attrition, prognostic factor measurement,  
30 confounding measurement and account, outcome measurement, and analysis and reporting  
31 are evaluated.

32  
33  
34  
35  
36  
37 Our systematic review identified no relevant RCTs, nevertheless we are aware of two ongoing  
38 RCTs investigating the effects of vitamin D on COVID-19, the ZnD3-CoVici study, France  
39 (NCT04351490)<sup>88</sup> and the CoVitTrial, France (NCT04344041).<sup>89</sup> Both trials have an estimated  
40 study completion date of July 2020. Inclusion of data from these studies in future systematic  
41 reviews and meta-analyses may enable us to potentially draw better stronger conclusions on  
42 this topic. Results from the ongoing international VITDALIZE Study (NCT03188796) may also  
43 contribute to our understanding of the effect of high dose vitamin D3 on mortality.<sup>90</sup>

### 44 45 46 47 48 **Study limitations**

49 We performed a full systematic review of the published evidence available, and simultaneous  
50 independent screening, data extraction and risk of bias assessments. However, our study is  
51 limited by the small amount of evidence available which was, moreover, at risk of bias. This  
52 limits the inferences that can be drawn. Seven eligible studies were excluded because they  
53 are not available as peer reviewed publications.<sup>63-69</sup> If published, these seven studies would  
54 be included in a future update of this review. A final limitation is that the review was restricted  
55 to English language only. Therefore, articles published in other languages may have been  
56 excluded.

### Implications for practice

Our review does not provide evidence for or against additional or high dose vitamin D supplementation specifically in relation to COVID-19. Treatment as standard practice for people who are deficient is pre-existing practice across Europe<sup>23</sup> the US<sup>22</sup> and in the UK.<sup>21</sup> Current guidelines from PHE suggest that the entire UK population should take vitamin D supplements to prevent vitamin D deficiency in winter or with inadequate sunlight exposure to sun in summer.<sup>21</sup> This review does not give evidence to drive a change in this current advice. Treatment recommendations for patients should be updated following the publication of results from ongoing and new well designed adequately powered randomised controlled trials

### Conclusion

This systematic review identified no robust evidence to enable us to assess an association between vitamin D supplementation or serum vitamin D level with susceptibility to COVID-19 including clinical course, morbidity and mortality outcomes. All studies were at high or unclear risk of bias. Both age and ethnicity were associated with vitamin D levels even after multivariable adjustment. Black and South Asian people had a much higher risk of confirmed COVID-19 compared to White people. However, there was no interaction between the association of ethnicity and vitamin D deficiency with COVID-19. There were no papers reporting association of vitamin D with severity of symptoms or mortality due to COVID-19.

**Acknowledgements:**

We thank Mrs Kath Charters, Welsh Ambulance Services NHS Trust for comments on the study design and drafts of this manuscript and for valuable advice and helpful discussions.

**Contributorship statement:**

SK, AG and AC conceived the study. AG, AC, NMCC, SK, STP and OU designed the study. RC and AB developed the search strategies, performed all searches and database management and created the bibliography. AG, AC, AM, OO, MZ screened titles and abstracts for inclusion. AG, OO, AM, MZ, LAK, AC screened at full text and extracted and analysed data. OO, AM, MZ, LAK performed risk of bias assessments. AC, SK and NMCC assisted in the interpretation from a clinical perspective. STP, LAK, OU offered technical and methodological support. AG and OO wrote the first draft, all authors revised content. All authors approved the final manuscript. AG and AC are the guarantors. The corresponding author attests that all listed authors meet authorship criteria and that no others meeting the criteria have been omitted.

**Copyright/license for publication:**

The Corresponding Author has the right to grant on behalf of all authors and does grant on behalf of all authors, a worldwide licence to the Publishers and its licensees in perpetuity, in all forms, formats and media (whether known now or created in the future), to i) publish, reproduce, distribute, display and store the Contribution, ii) translate the Contribution into other languages, create adaptations, reprints, include within collections and create summaries, extracts and/or, abstracts of the Contribution, iii) create any other derivative work(s) based on the Contribution, iv) to exploit all subsidiary rights in the Contribution, v) the inclusion of electronic links from the Contribution to third party material where-ever it may be located; and, vi) licence any third party to do any or all of the above.

**Funding:**

Dr Amy Grove is supported by the National Institute for Health Research (NIHR) Advanced Fellowship Programme Reference (AF-300060). Dr Taylor-Phillips is supported by an NIHR Career Development Fellowship (CDF-2016-09-018). Prof Clarke and Dr Al-Khudairy are supported by the NIHR Applied Research Centre West Midlands (ARC-WM). All other authors, with the exception of Professor Uthman, Professor Kumar and Professor McCarthy, are supported by the NIHR, Evidence Synthesis Programme (HTA 14.25.05). The views expressed are those of the authors and not necessarily those of the NIHR or the Department of Health and Social Care.

**Competing interests:**

All authors have completed the ICMJE uniform disclosure form at [www.icmje.org/coi\\_disclosure.pdf](http://www.icmje.org/coi_disclosure.pdf) and declare: no support from any organisation for the submitted work; no competing interests with regards to the submitted work.

**Ethical approval statement:**

Not required. Systematic review - secondary research.

**Data sharing statement:**

The study protocol is available

Systematic review protocol registration: CRD42020182876 available online via PROSPERO at [https://www.crd.york.ac.uk/prospero/display\\_record.php?ID=CRD42020182876](https://www.crd.york.ac.uk/prospero/display_record.php?ID=CRD42020182876). All included studies are publicly available. Additional data are available upon reasonable request by emailing the corresponding author.

## References

1. World Health Organization. Coronavirus disease (COVID-19) pandemic. 2020. <https://www.who.int/emergencies/diseases/novel-coronavirus-2019>
2. NHS. Check if you or your child has coronavirus symptoms. 2020. <https://www.nhs.uk/conditions/coronavirus-covid-19/symptoms/#symptoms>
3. Argenziano MG, Bruce SL, Slater CL, et al. Characterization and clinical course of 1000 patients with coronavirus disease 2019 in New York: retrospective case series. *BMJ* 2020;369:m1996. doi: 10.1136/bmj.m1996
4. Matthay MA, Aldrich JM, Gotts JE. Treatment for severe acute respiratory distress syndrome from COVID-19. *Lancet Respir Med* 2020;8(5):433-34. doi: 10.1016/s2213-2600(20)30127-2
5. Gruber BM. Fenomen witaminy D [The phenomenon of vitamin D]. *Postepy Hig Med Dosw (Online)* 2015;69:127-39
6. Gruber-Bzura BM. Vitamin D and influenza: prevention or therapy? *Int J Mol Sci* 2018;19(8):2419. doi: 10.3390/ijms19082419
7. Holick MF. High prevalence of vitamin D inadequacy and implications for health. *Mayo Clin Proc* 2006;81(3):353-73. doi: 10.4065/81.3.353
8. Sigmundsdottir H, Pan J, Debes GF, et al. DCs metabolize sunlight-induced vitamin D3 to 'program' T cell attraction to the epidermal chemokine CCL27. *Nat Immunol* 2007;8(3):285-93. doi: 10.1038/ni1433
9. Kogawa M, Findlay DM, Anderson PH, et al. Osteoclastic metabolism of 25(OH)-vitamin D3: a potential mechanism for optimization of bone resorption. *Endocrinology* 2010;151(10):4613-25. doi: 10.1210/en.2010-0334
10. Jones G. Vitamin D safety: its mechanisms and application. *Standardy Medyczne, Pediatria* 2012;9:605-09
11. Kim D. The role of vitamin D in thyroid diseases. *Int J Mol Sci* 2017;18(9):1949. doi: 10.3390/ijms18091949
12. Beard JA, Bearden A, Striker R. Vitamin D and the anti-viral state. *J Clin Virol* 2011;50(3):194-200. doi: 10.1016/j.jcv.2010.12.006
13. Liu PT, Stenger S, Li H, et al. Toll-like receptor triggering of a vitamin D-mediated human antimicrobial response. *Science* 2006;311(5768):1770-3. doi: 10.1126/science.1123933
14. Adams JS, Ren S, Liu PT, et al. Vitamin D-directed rheostatic regulation of monocyte antibacterial responses. *J Immunol* 2009;182(7):4289-95. doi: 10.4049/jimmunol.0803736
15. Laaksi I. Vitamin D and respiratory infection in adults. *Proc Nutr Soc* 2012;71(1):90-7. doi: 10.1017/s0029665111003351
16. Sharifi A, Vahedi H, Nedjat S, Rafiei H, Hosseinzadeh-Attar MJ. Effect of single-dose injection of vitamin D on immune cytokines in ulcerative colitis patients: a randomized placebo-controlled trial. *APMIS* 2019;127(10):681-87. doi: 10.1111/apm.12982
17. Cantorna MT, Snyder L, Lin YD, Yang L. Vitamin D and 1,25(OH)<sub>2</sub>D regulation of T cells. *Nutrients* 2015;7(4):3011-21. doi: 10.3390/nu7043011
18. Jeffery LE, Burke F, Mura M, et al. 1,25-Dihydroxyvitamin D3 and IL-2 combine to inhibit T cell production of inflammatory cytokines and promote development of regulatory

- 1  
2  
3 T cells expressing CTLA-4 and FoxP3. *J Immunol* 2009;183(9):5458-67. doi:  
4 10.4049/jimmunol.0803217  
5  
6 19. Lei GS, Zhang C, Cheng BH, Lee CH. Mechanisms of action of vitamin D as supplemental  
7 therapy for pneumocystis pneumonia. *Antimicrob Agents Chemother*  
8 2017;61(10):e01226-17. doi: 10.1128/aac.01226-17  
9  
10 20. Colunga Biancatelli RML, Berrill M, Marik PE. The antiviral properties of vitamin C. *Expert*  
11 *Rev Anti Infect Ther* 2020;18(2):99-101. doi: 10.1080/14787210.2020.1706483  
12  
13 21. Scientific Advisory Committee on Nutrition. SACN vitamin D and health report. 21 July  
14 2016. [https://www.gov.uk/government/publications/sacn-vitamin-d-and-health-](https://www.gov.uk/government/publications/sacn-vitamin-d-and-health-report)  
15 [report](https://www.gov.uk/government/publications/sacn-vitamin-d-and-health-report)  
16  
17 22. National Institutes of Health, Office of Dietary Supplements. Vitamin D: fact sheet for  
18 health professionals. 24 March 2020. [https://ods.od.nih.gov/factsheets/VitaminD-](https://ods.od.nih.gov/factsheets/VitaminD-HealthProfessional/#h2)  
19 [HealthProfessional/#h2](https://ods.od.nih.gov/factsheets/VitaminD-HealthProfessional/#h2)  
20  
21 23. EFSA Panel on Dietetic Products, Nutrition and Allergies. Dietary reference values for  
22 vitamin D. *EFSA Journal* 2016;14(10):e04547. doi: 10.2903/j.efsa.2016.4547  
23  
24 24. Cao Z, Wu Y, Faucon E, Sabatier JM. SARS-CoV-2 & Covid-19: key-roles of the 'renin-  
25 angiotensin' system / vitamin D impacting drug and vaccine developments. *Infect*  
26 *Disord Drug Targets* 2020;20(1). doi: 10.2174/1871526520999200505174704  
27  
28 25. Jakovac H. COVID-19 and vitamin D: is there a link and an opportunity for intervention?  
29 *Am J Physiol Endocrinol Metab* 2020;318(5):E589. doi: 10.1152/ajpendo.00138.2020  
30  
31 26. Mitchell F. Vitamin-D and COVID-19: do deficient risk a poorer outcome? *Lancet*  
32 *Diabetes Endocrinol* 2020;8(7):570. doi: 10.1016/S2213-8587(20)30183-2  
33  
34 27. Silberstein M. Vitamin D: a simpler alternative to tocilizumab for trial in COVID-19? *Med*  
35 *Hypotheses* 2020;140:109767. doi: 10.1016/j.mehy.2020.109767  
36  
37 28. Calder PC, Carr AC, Gombart AF, Eggersdorfer M. Optimal nutritional status for a well-  
38 functioning immune system is an important factor to protect against viral infections.  
39 *Nutrients* 2020;12(4):1181. doi: <https://dx.doi.org/10.3390/nu12041181>  
40  
41 29. Tian Y, Rong L. Letter: Covid-19, and vitamin D. Authors' reply. *Aliment Pharmacol Ther*  
42 2020;51(10):995-96. doi: 10.1111/apt.15764  
43  
44 30. Busby M. UK public health bodies reviewing vitamin D's effects on coronavirus. The  
45 Guardian; 17 June 2020. [https://www.theguardian.com/world/2020/jun/17/uk-](https://www.theguardian.com/world/2020/jun/17/uk-ministers-order-urgent-vitamin-d-coronavirus-review)  
46 [ministers-order-urgent-vitamin-d-coronavirus-review](https://www.theguardian.com/world/2020/jun/17/uk-ministers-order-urgent-vitamin-d-coronavirus-review)  
47  
48 31. Coronavirus: Should I start taking vitamin D? BBC News; 18 June 2020.  
49 <https://www.bbc.co.uk/news/health-52371688>  
50  
51 32. Torjesen I. Covid-19: Public health agencies review whether vitamin D supplements  
52 could reduce risk. *BMJ* 2020;369:m2475. doi: 10.1136/bmj.m2475  
53  
54 33. Grant WB, Lahore H, McDonnell SL, et al. Evidence that vitamin D supplementation  
55 could reduce risk of influenza and COVID-19 infections and deaths. *Nutrients*  
56 2020;12(4):988. doi: 10.3390/nu12040988  
57  
58 34. Parker J, Hashmi O, Dutton D, et al. Levels of vitamin D and cardiometabolic disorders:  
59 systematic review and meta-analysis. *Maturitas* 2010;65(3):225-36. doi:  
60 10.1016/j.maturitas.2009.12.013  
35. Cannell JJ, Vieth R, Umhau JC, et al. Epidemic influenza and vitamin D. *Epidemiol Infect*  
2006;134(6):1129-40. doi: 10.1017/s0950268806007175  
36. Jolliffe DA, Griffiths CJ, Martineau AR. Vitamin D in the prevention of acute respiratory  
infection: systematic review of clinical studies. *J Steroid Biochem Mol Biol*  
2013;136:321-9. doi: 10.1016/j.jsbmb.2012.11.017



- 1
- 2
- 3
- 4 37. Nnoaham KE, Clarke A. Low serum vitamin D levels and tuberculosis: a systematic review
- 5 and meta-analysis. *Int J Epidemiol* 2008;37(1):113-19. doi: 10.1093/ije/dym247
- 6 38. Martineau AR, Jolliffe DA, Hooper RL, et al. Vitamin D supplementation to prevent acute
- 7 respiratory tract infections: systematic review and meta-analysis of individual
- 8 participant data. *BMJ* 2017;356:i6583. doi: 10.1136/bmj.i6583
- 9 39. Bolland MJ, Avenell A. Do Vitamin D supplements help prevent respiratory tract
- 10 infections? *BMJ* 2017;356:j456. doi: 10.1136/bmj.j456
- 11 40. National Institute for Health and Care Excellence. COVID-19 rapid evidence summary:
- 12 vitamin D for COVID-19. 29 June 2020.
- 13 <https://www.nice.org.uk/advice/es28/chapter/Key-messages>
- 14 41. Royal Society. Vitamin D and covid-19. 18 June 2020. [https://royalsociety.org/-](https://royalsociety.org/-/media/policy/projects/set-c/set-c-vitamin-d-and-covid-19.pdf)
- 15 [/media/policy/projects/set-c/set-c-vitamin-d-and-covid-19.pdf](https://royalsociety.org/-/media/policy/projects/set-c/set-c-vitamin-d-and-covid-19.pdf)
- 16 42. Lee J, van Hecke O, Roberts N, on behalf of the Oxford COVID-19 Evidence Service Team.
- 17 Vitamin D: a rapid review of the evidence for treatment or prevention in COVID-19.
- 18 Centre for Evidence-Based Medicine, University of Oxford; 1 May 2020.
- 19 [https://www.cebm.net/covid-19/vitamin-d-a-rapid-review-of-the-evidence-for-](https://www.cebm.net/covid-19/vitamin-d-a-rapid-review-of-the-evidence-for-treatment-or-prevention-in-covid-19/)
- 20 [treatment-or-prevention-in-covid-19/](https://www.cebm.net/covid-19/vitamin-d-a-rapid-review-of-the-evidence-for-treatment-or-prevention-in-covid-19/)
- 21 43. Moher D, Liberati A, Tetzlaff J, Altman DG. Preferred reporting items for systematic
- 22 reviews and meta-analyses: the PRISMA statement. *BMJ* 2009;339:b2535. doi:
- 23 10.1136/bmj.b2535
- 24 44. World Health Organization. Global research on coronavirus disease (COVID-19) [online
- 25 database]. 2020. [https://www.who.int/emergencies/diseases/novel-coronavirus-](https://www.who.int/emergencies/diseases/novel-coronavirus-2019/global-research-on-novel-coronavirus-2019-ncov)
- 26 [2019/global-research-on-novel-coronavirus-2019-ncov](https://www.who.int/emergencies/diseases/novel-coronavirus-2019/global-research-on-novel-coronavirus-2019-ncov)
- 27 45. Oxford COVID-19 Evidence Service. Centre for Evidence-Based Medicine, University of
- 28 Oxford; 2020. <https://www.cebm.net/oxford-covid-19-evidence-service/>
- 29 46. Counotte M, Imeri H, Ipekci M, Low N. Living evidence on COVID-19 [online database].
- 30 University of Bern Institute of Social and Preventive Medicine; 2020.
- 31 <https://zika.ispm.unibe.ch/assets/data/pub/ncov/>
- 32 47. Centers for Disease Control and Prevention. CDC SARS response timeline. 2013.
- 33 <https://www.cdc.gov/about/history/sars/timeline.htm>
- 34 48. Downs SH, Black N. The feasibility of creating a checklist for the assessment of the
- 35 methodological quality both of randomised and non-randomised studies of health
- 36 care interventions. *J Epidemiol Community Health* 1998;52(6):377-84. doi:
- 37 10.1136/jech.52.6.377
- 38 49. Carter SJ, Baranuskas MN, Fly AD. Considerations for obesity, vitamin D, and physical
- 39 activity amidst the COVID-19 pandemic. *Obesity (Silver Spring)* 2020;28:1176-77. doi:
- 40 10.1002/oby.22838
- 41 50. Molloy EJ, Murphy N. Vitamin D, covid-19 and children. *Ir Med J* 2020;113(4):64
- 42 51. McCartney DM, Byrne DG. Optimisation of vitamin D status for enhanced immuno-
- 43 protection against covid-19. *Ir Med J* 2020;113(4):P58
- 44 52. Adams KK, Baker WL, Sobieraj DM. Myth busters: dietary supplements and COVID-19.
- 45 *Ann Pharmacother* 2020;54(8):820-26. doi: 10.1177/1060028020928052
- 46 53. de Lucena TMC, da Silva Santos AF, de Lima BR, de Albuquerque Borborema ME, de
- 47 Azevedo Silva J. Mechanism of inflammatory response in associated comorbidities in
- 48 COVID-19. *Diabetes Metab Syndr* 2020;14(4):597-600. doi:
- 49 10.1016/j.dsx.2020.05.025
- 50
- 51
- 52
- 53
- 54
- 55
- 56
- 57
- 58
- 59
- 60

- 1  
2  
3  
4 54. Ghasemian R, Shamshirian A, Heydari K, et al. The role of vitamin D in the age of COVID-  
5 19: a systematic review and meta-analysis along with an ecological approach.  
6 *medRxiv* 2020. doi: 10.1101/2020.06.05.20123554
- 7 55. Hribar CA, Cobbold PH, Church FC. Potential role of vitamin D in the elderly to resist  
8 COVID-19 and to slow progression of Parkinson's disease. *Brain Sci* 2020;10(5):284.  
9 doi: 10.3390/brainsci10050284
- 10 56. Laird E, Rhodes J, Kenny RA. Vitamin D and inflammation: potential implications for  
11 severity of Covid-19. *Ir Med J* 2020;113(5):P81
- 12 57. McKenna MJ, Flynn MAT. Covid-19, cocooning and vitamin D intake requirements. *Ir*  
13 *Med J* 2020;113(5):P79
- 14 58. Ribeiro H, Santana KVS, Oliver SL, et al. Does vitamin D play a role in the management of  
15 Covid-19 in Brazil? *Rev Saude Publica* 2020;54:53
- 16 59. Speeckaert MM, Delanghe JR. Association between low vitamin D and COVID-19: don't  
17 forget the vitamin D binding protein. *Aging Clin Exp Res* 2020. doi: 10.1007/s40520-  
18 020-01607-y
- 19 60. Suresh PS. Hypovitaminosis D and COVID-19: matter of concern in India? *Indian J Clin*  
20 *Biochem* 2020. doi: 10.1007/s12291-020-00894-6
- 21 61. Tan SHS, Hong CC, Saha S, Murphy D, Hui JH. Medications in COVID-19 patients:  
22 summarizing the current literature from an orthopaedic perspective. *Int Orthop*  
23 2020. doi: 10.1007/s00264-020-04643-5
- 24 62. Zabetakis I, Lordan R, Norton C, Tsoupras A. COVID-19: the inflammation link and the  
25 role of nutrition in potential mitigation. *Nutrients* 2020;12(5):1466. doi:  
26 10.3390/nu12051466
- 27 63. Lau FH, Majumder R, Torabi R, et al. Vitamin D insufficiency is prevalent in severe  
28 COVID-19. *medRxiv* 2020. doi: 10.1101/2020.04.24.20075838
- 29 64. Darling AL, Ahmadi KR, Ward KA, et al. Vitamin D status, body mass index, ethnicity and  
30 COVID-19: initial analysis of the first-reported UK Biobank COVID-19 positive cases (n  
31 580) compared with negative controls (n 723). *medRxiv* 2020. doi:  
32 10.1101/2020.04.29.20084277
- 33 65. De Smet D, De Smet K, Herroelen P, Gryspeerdt S, Martens GA. Vitamin D deficiency as  
34 risk factor for severe COVID-19: a convergence of two pandemics. *medRxiv* 2020.  
35 doi: 10.1101/2020.05.01.20079376
- 36 66. Meltzer DO, Best TJ, Zhang H, Vokes T, Arora V, Solway J. Association of vitamin D  
37 deficiency and treatment with COVID-19 incidence. *medRxiv* 2020. doi:  
38 10.1101/2020.05.08.20095893
- 39 67. Notari A, Torrieri G. COVID-19 transmission risk factors. *medRxiv* 2020. doi:  
40 10.1101/2020.05.08.20095083
- 41 68. Raisi-Estabragh Z, McCracken C, Bethell MS, et al. Greater risk of severe COVID-19 in  
42 non-White ethnicities is not explained by cardiometabolic, socioeconomic, or  
43 behavioural factors, or by 25(OH)-vitamin D status: study of 1,326 cases from the UK  
44 Biobank. *medRxiv* 2020. doi: 10.1101/2020.06.01.20118943
- 45 69. Tan CW, Ho LP, Kalimuddin S, et al. A cohort study to evaluate the effect of combination  
46 vitamin D, magnesium and vitamin B12 (DMB) on progression to severe outcome in  
47 older COVID-19 patients. *medRxiv* 2020. doi: 10.1101/2020.06.01.20112334
- 48 70. Hastie CE, Mackay DF, Ho F, et al. Vitamin D concentrations and COVID-19 infection in  
49 UK Biobank. *Diabetes Metab Syndr* 2020;14(4):561-65. doi:  
50 10.1016/j.dsx.2020.04.050
- 51  
52  
53  
54  
55  
56  
57  
58  
59  
60



- 1
- 2
- 3
- 4 71. Ilie PC, Stefanescu S, Smith L. The role of vitamin D in the prevention of coronavirus
- 5 disease 2019 infection and mortality. *Aging Clin Exp Res* 2020. doi: 10.1007/s40520-
- 6 020-01570-8
- 7 72. UK Biobank. About UK Biobank. 17 June 2020. [https://www.ukbiobank.ac.uk/about-](https://www.ukbiobank.ac.uk/about-biobank-uk/)
- 8 [biobank-uk/](https://www.ukbiobank.ac.uk/about-biobank-uk/)
- 9 73. D'Avolio A, Avataneo V, Manca A, et al. 25-hydroxyvitamin D concentrations are lower in
- 10 patients with positive PCR for SARS-CoV-2. *Nutrients* 2020;12(5):1359. doi:
- 11 10.3390/nu12051359
- 12 74. Fasano A, Cereda E, Barichella M, et al. COVID-19 in Parkinson's Disease Patients Living
- 13 in Lombardy, Italy. *Mov Disord* 2020. doi: 10.1002/mds.28176
- 14 75. Liu Y, Mao B, Liang S, et al. Association between age and clinical characteristics and
- 15 outcomes of COVID-19. *Eur Respir J* 2020;55(5):2001112. doi:
- 16 10.1183/13993003.01112-2020
- 17 76. Verity R, Okell LC, Dorigatti I, et al. Estimates of the severity of coronavirus disease 2019:
- 18 a model-based analysis. *Lancet Infect Dis* 2020;20(6):669-77. doi: 10.1016/s1473-
- 19 3099(20)30243-7
- 20 77. Mahase E. Covid-19: death rate is 0.66% and increases with age, study estimates. *BMJ*
- 21 2020;369:m1327. doi: 10.1136/bmj.m1327
- 22 78. Fulzele S, Sahay B, Yusufu I, et al. COVID-19 virulence in aged patients might be
- 23 impacted by the host cellular microRNAs abundance/profile. *Aging Dis*
- 24 2020;11(3):509-22. doi: 10.14336/ad.2020.0428
- 25 79. Koff WC, Williams MA. Covid-19 and immunity in aging populations: a new research
- 26 agenda. *N Engl J Med* 2020. doi: 10.1056/NEJMp2006761
- 27 80. Pan D, Sze S, Minhas JS, et al. The impact of ethnicity on clinical outcomes in COVID-19:
- 28 a systematic review. *EClinicalMedicine*. doi: 10.1016/j.eclinm.2020.100404
- 29 81. Lee C. "Race" and "ethnicity" in biomedical research: how do scientists construct and
- 30 explain differences in health? *Soc Sci Med* 2009;68(6):1183-90. doi:
- 31 10.1016/j.socscimed.2008.12.036
- 32 82. Stead WW, Senner JW, Reddick WT, Lofgren JP. Racial differences in susceptibility to
- 33 infection by Mycobacterium tuberculosis. *N Engl J Med* 1990;322(7):422-7. doi:
- 34 10.1056/nejm199002153220702
- 35 83. Nahid P, Horne DJ, Jarlsberg LG, et al. Racial differences in tuberculosis infection in
- 36 United States communities: the coronary artery risk development in young adults
- 37 study. *Clin Infect Dis* 2011;53(3):291-4. doi: 10.1093/cid/cir378
- 38 84. Bime C, Poongkunran C, Borgstrom M, et al. Racial differences in mortality from severe
- 39 acute respiratory failure in the United States, 2008-2012. *Ann Am Thorac Soc*
- 40 2016;13(12):2184-89. doi: 10.1513/AnnalsATS.201605-359OC
- 41 85. Lanham-New SA, Webb AR, Cashman KD, et al. Vitamin D and SARS-CoV-2 virus/COVID-
- 42 19 disease. *BMJ Nutrition, Prevention & Health* 2020:bmjnph-2020-000089. doi:
- 43 10.1136/bmjnph-2020-000089
- 44 86. Huang F, Zhang C, Liu Q, et al. Identification of amitriptyline HCl, flavin adenine
- 45 dinucleotide, azacitidine and calcitriol as repurposing drugs for influenza A H5N1
- 46 virus-induced lung injury. *PLoS Pathog* 2020;16(3):e1008341. doi:
- 47 10.1371/journal.ppat.1008341
- 48 87. Lee C. Controversial effects of vitamin D and related genes on viral infections,
- 49 pathogenesis, and treatment outcomes. *Nutrients* 2020;12(4):962. doi:
- 50 10.3390/nu12040962
- 51
- 52
- 53
- 54
- 55
- 56
- 57
- 58
- 59
- 60

- 1  
2  
3 88. Impact of zinc and vitamin D3 supplementation on the survival of aged patients infected  
4 with COVID-19. NCT04351490. ClinicalTrials.gov, U.S. National Library of Medicine;  
5 2020. <https://ClinicalTrials.gov/show/NCT04351490>  
6  
7 89. COvid-19 and Vitamin D supplementation: a multicenter randomized controlled trial of  
8 high dose versus standard dose vitamin D3 in high-risk COVID-19 Patients  
9 (CoVitTrial). NCT04344041. ClinicalTrials.gov, U.S. National Library of Medicine;  
10 2020. <https://clinicaltrials.gov/show/NCT04344041>  
11  
12 90. The VITDALIZE Study: effect of high-dose vitamin D3 on 28-day mortality in adult  
13 critically ill patients. NCT03188796. ClinicalTrials.gov, U.S. National Library of  
14 Medicine; 2017. <https://ClinicalTrials.gov/show/NCT03188796>  
15  
16  
17

### 18 **Figure legends**

19  
20  
21 Figure 1. PRISMA flow diagram for the selection of studies  
22  
23  
24  
25  
26  
27  
28  
29  
30  
31  
32  
33  
34  
35  
36  
37  
38  
39  
40  
41  
42  
43  
44  
45  
46  
47  
48  
49  
50  
51  
52  
53  
54  
55  
56  
57  
58  
59  
60



## Supplemental file

### Contents

1. Full record of search
2. Full details of the study eligibility criteria
3. List of studies excluded at full text review
4. Articles included at full text, but later excluded at time of narrative synthesis
5. Quality assessment of included studies

#### 1. Full record of search

#### Medline (Ovid)

Search date: 06/05/2020

Database: Ovid MEDLINE(R) ALL <1946 to May 05, 2020>

Search Strategy:

- 
- 1 exp Vitamin D/ (58492)
  - 2 Vitamin D Deficiency/ (15552)
  - 3 (vitamin D? or vit D? or D vitamin? or ergocalciferol or cholecalciferol or colecalciferol or calciferol or dihydroergocalciferol or sitocalciferol or dihydrotachysterol or dihydroxycholecalciferol? or hydroxycholecalciferol? or "25(OH)D?" or 25OHD? or calcidiol or hydroxyergocalciferol or alfacalcidol or alphacalcidol or "1,25(OH)2D" or hydroxyvitamin D? or dihydroxyvitamin D?).ab,kf,ti. (78232)
  - 4 (paricalcitol or doxercalciferol or doxerocalciferol or calcifediol or calcitriol).ab,kf,ti. (5577)
  - 5 hypovitaminosis D?.ab,kf,ti. (1775)
  - 6 ((D or D2 or D3) adj3 supplement\*).ab,kf,ti. (12158)
  - 7 1 or 2 or 3 or 4 or 5 or 6 (92560)
  - 8 coronavirus/ or betacoronavirus/ or betacoronavirus 1/ or coronavirus oc43, human/ or middle east respiratory syndrome coronavirus/ or sars virus/ (7431)
  - 9 coronavirus infections/ or severe acute respiratory syndrome/ (10675)
  - 10 (((corona\* or corono\*) adj1 (virus\* or viral\* or virinae\*)) or coronavirus\* or coronovirus\* or coronavirinae\* or Coronavirus\* or Coronovirus\* or Wuhan\* or Hubei\* or Huanan or "2019-nCoV" or 2019nCoV or nCoV2019 or "nCoV-2019" or "COVID-19" or COVID19 or "CORVID-19" or CORVID19 or "WN-CoV" or WNCov or "HCoV-19" or HCoV19 or CoV or "2019 novel\*" or Ncov or "n-cov" or "SARS-CoV-2" or "SARSCoV-2" or "SARSCoV2" or "SARS-CoV2" or SARSCov19 or "SARS-Cov19" or "SARSCov-19" or "SARS-Cov-19" or Ncovor or Ncorona\* or Ncorono\* or NcovWuhan\* or NcovHubei\* or NcovChina\* or NcovChinese\*).ab,kf,ti. (26891)
  - 11 (severe acute respiratory syndrome or SARS or Middle East respiratory syndrome or MERS).ab,kf,ti. (16560)
  - 12 (betacoronavirus\* or betacoronavirinae\*).ab,kf,ti. (280)
  - 13 8 or 9 or 10 or 11 or 12 (37180)
  - 14 7 and 13 (32)
  - 15 exp Animals/ (23144176)

- 1  
2  
3 16 exp Humans/ (18448248)  
4 17 15 not 16 (4695928)  
5 18 14 not 17 (30)  
6 19 limit 18 to yr="2002 -Current" (30)  
7  
8

### Update

- 9  
10 Search date: 10/6/2020  
11 Actual databases searched: Ovid MEDLINE All <1946 to June 09, 2020>  
12 Search strategy:  
13 Re-ran search above plus...  
14 20 limit 19 to ed=20200506-20200610 (8)  
15 21 limit 19 to ep=20200506-20200610 (39)  
16 22 limit 19 to dt=20200506-20200610 (43)  
17 23 limit 19 to ez=20200506-20200610 (27)  
18 24 20 or 21 or 22 or 23 (46)  
19  
20  
21  
22

### Embase (Ovid)

- 23  
24 Search date: 06/05/2020  
25 Database: Embase <1974 to 2020 May 05>  
26 Search Strategy:  
27  
28

- 29 1 exp vitamin D/ (139781)  
30 2 vitamin D deficiency/ (29333)  
31 3 (vitamin D? or vit D? or D vitamin? or ergocalciferol or cholecalciferol or colecalciferol or  
32 calciferol or dihydroergocalciferol or sitocalciferol or dihydrotachysterol or dihydroxycholecalciferol?  
33 or hydroxycholecalciferol? or "25(OH)D?" or 25OHD? or calcidiol or hydroxyergocalciferol or  
34 alfacalcidol or alphacalcidol or "1,25(OH)2D" or hydroxyvitamin D? or dihydroxyvitamin D?).ab,kw,ti.  
35 (112459)  
36 4 (paricalcitol or doxercalciferol or doxerocalciferol or calcifediol or calcitriol).ab,kw,ti. (8478)  
37 5 hypovitaminosis D?.ab,kw,ti. (3012)  
38 6 ((D or D2 or D3) adj3 supplement\*).ab,kw,ti. (19177)  
39 7 1 or 2 or 3 or 4 or 5 or 6 (163395)  
40 8 betacoronavirus 1/ or betacoronavirus/ or human coronavirus oc43/ (696)  
41 9 Middle East respiratory syndrome coronavirus/ (2028)  
42 10 sars-related coronavirus/ or sars coronavirus/ (6354)  
43 11 Coronavirinae/ (2231)  
44 12 coronavirus infection/ or middle east respiratory syndrome/ or severe acute respiratory  
45 syndrome/ (11950)  
46 13 (((corona\* or corono\*) adj1 (virus\* or viral\* or virinae\*)) or coronavirus\* or coronovirus\* or  
47 coronavirinae\* or Coronavirus\* or Coronovirus\* or Wuhan\* or Hubei\* or Huanan or "2019-nCoV" or  
48 2019nCoV or nCoV2019 or "nCoV-2019" or "COVID-19" or COVID19 or "CORVID-19" or CORVID19 or  
49 "WN-CoV" or WNCov or "HCoV-19" or HCoV19 or CoV or "2019 novel\*" or Ncov or "n-cov" or "SARS-  
50 CoV-2" or "SARSCoV-2" or "SARSCoV2" or "SARS-CoV2" or SARSCov19 or "SARS-Cov19" or "SARSCov-  
51 19" or "SARS-Cov-19" or Ncover or Ncorona\* or Ncorono\* or NcovWuhan\* or NcovHubei\* or  
52 NcovChina\* or NcovChinese\*).ab,kw,ti. (27686)  
53 14 (severe acute respiratory syndrome or SARS or Middle East respiratory syndrome or  
54 MERS).ab,kw,ti. (17146)  
55 15 (betacoronavirus\* or betacoronavirinae\*).ab,kw,ti. (275)  
56 16 8 or 9 or 10 or 11 or 12 or 13 or 14 or 15 (40716)  
57  
58  
59  
60

1  
2  
3 17 7 and 16 (61)  
4 18 exp animal/ (25459151)  
5 19 exp human/ (20834835)  
6 20 18 not 19 (4624316)  
7 21 17 not 20 (58)  
8 22 limit 21 to yr="2002 -Current" (58)  
9

#### 10 Update

11 Search date: 10/6/2020

12 Actual databases searched: Ovid Embase <1974 to 2020 June 09>

13 Search strategy:

14 Re-ran search above plus...

15 22 limit 21 to yr="2002 -Current" (123)  
16 23 limit 22 to dd=20200506-20200610 (39)  
17 24 limit 22 to em=202005-202006 (0)  
18 25 limit 22 to dc=20200506-20200610 (62)  
19 26 23 or 24 or 25 (62)  
20  
21  
22  
23

24 **MedrXiv** (searched via Medrxivr <https://mcguinlu.shinyapps.io/medrxivr/>)

25 Search date: 07/05/2020

26 Search Strategy:

27 Topic 1:

28 [Vv]itamin D  
29 [Vv]itamin D2  
30 [Vv]itamin D3  
31 calciferol  
32 25OHD  
33 25OHD3  
34 [Hh]ypovitaminosis D  
35  
36  
37  
38  
39  
40  
41

42 Topic 2:

43 [Cc]oronavirus  
44 [Cc]orona(\s)([:graph:]+\s){0,1}virus  
45 [Cc]oronavirinae  
46 [Cc]ovid  
47 COVID  
48 nCoV  
49 NCOV  
50 Ncov  
51 [Nn]-cov  
52 N-COV  
53 2019ncov  
54 2019-ncov  
55 ncov2019  
56 ncov-2019  
57  
58  
59  
60

1  
2  
3 SARS

4 [Ss]evere [Aa]cute [Rr]espiratory [Ss]yndrome

5 [Mm]iddle [Ee]ast [Rr]espiratory [Ss]yndrome

6 MERS  
7

8  
9 Earliest record date

10 20190101

11 Latest record date

12 20200507

13 Remove older versions of the same record  
14

15 6 results  
16

17 Update

18 Search date: 10/6/2020

19 Re-ran search above changing record dates as follows:

20 Earliest record date

21 20200507

22 Latest record date

23 20200610

24 Remove older versions of the same record  
25  
26

27  
28 11 results  
29

30  
31 **BioRxiv**

32 <https://www.biorxiv.org/>

33  
34 Search date: 07/05/2020  
35

36 65 Results

37 for abstract or title "vitamin D" (match phrase words)  
38  
39

40 22 Results

41 for full text or abstract or title "ergocalciferol cholecalciferol colecalciferol" (match whole any)  
42  
43

44 41 Results

45 for full text or abstract or title "25OHD 25OHD3" (match whole any)  
46

47 Imported into EndNote and de-duplicated

48 92 results after deduplication  
49

50 Searched in Endnote using the following search strategy:

51 coronavirus or corona or covid or SARS or MERS or betacoronavirus or ncov

52 *Any Field*  
53

54 5 results  
55  
56

57  
58 Update

59 Search date: 10/6/2020  
60



## 1 Results

for abstract or title "vitamin D" (match phrase words) and posted between "07 May, 2020 and 10 Jun, 2020" – *animal study (also in both results sets below) so not exported to EndNote*

## 3 Results

for full text or abstract or title "ergocalciferol cholecalciferol colecalciferol" (match whole any) and posted between "07 May, 2020 and 10 Jun, 2020" - *2 animal studies and 1 on sertraline in TB*

## 2 Results

for full text or abstract or title "25OHD 25OHD3" (match whole any) and posted between "07 May, 2020 and 10 Jun, 2020" - *1 animal study, 1 non-clinical / non-coronavirus*

0 results relevant to coronaviruses

**Cochrane Library**

Search date: 08/05/2020

| ID  | Search                                                                                                                                                                                                                                                                                                                                                                                                                                                                                                                                                                                                        | Hits  |
|-----|---------------------------------------------------------------------------------------------------------------------------------------------------------------------------------------------------------------------------------------------------------------------------------------------------------------------------------------------------------------------------------------------------------------------------------------------------------------------------------------------------------------------------------------------------------------------------------------------------------------|-------|
| #1  | MeSH descriptor: [Vitamin D] explode all trees                                                                                                                                                                                                                                                                                                                                                                                                                                                                                                                                                                | 5224  |
| #2  | MeSH descriptor: [Vitamin D Deficiency] this term only                                                                                                                                                                                                                                                                                                                                                                                                                                                                                                                                                        | 1226  |
| #3  | ((vitamin NEXT D?) or (vit NEXT D?) or (D NEXT vitamin?) or ergocalciferol or cholecalciferol or colecalciferol or calciferol or dihydroergocalciferol or sitocalciferol or dihydrotachysterol or dihydroxycholecalciferol? or hydroxycholecalciferol? or "25(OH)D" or "25(OH)D3" or 25OHD? or calcdiol or hydroxyergocalciferol or alfalcidol or alphacalcidol or "1,25(OH)2D" or (hydroxyvitamin NEXT D?) or (dihydroxyvitamin NEXT D?):ti,ab,kw                                                                                                                                                            | 12959 |
| #4  | (paricalcitol or doxercalciferol or doxerocalciferol or calcifediol or calcitriol):ti,ab,kw                                                                                                                                                                                                                                                                                                                                                                                                                                                                                                                   | 2417  |
| #5  | hypovitaminosis NEXT D?                                                                                                                                                                                                                                                                                                                                                                                                                                                                                                                                                                                       | 303   |
| #6  | ((D OR D2 OR D3) NEAR/3 supplement*):ti,ab,kw                                                                                                                                                                                                                                                                                                                                                                                                                                                                                                                                                                 | 5633  |
| #7  | #1 or #2 or #3 or #4 or #5 or #6                                                                                                                                                                                                                                                                                                                                                                                                                                                                                                                                                                              | 14461 |
| #8  | MeSH descriptor: [Coronavirus] this term only                                                                                                                                                                                                                                                                                                                                                                                                                                                                                                                                                                 | 2     |
| #9  | MeSH descriptor: [Betacoronavirus] this term only                                                                                                                                                                                                                                                                                                                                                                                                                                                                                                                                                             | 2     |
| #10 | MeSH descriptor: [Betacoronavirus 1] this term only                                                                                                                                                                                                                                                                                                                                                                                                                                                                                                                                                           | 0     |
| #11 | MeSH descriptor: [Coronavirus OC43, Human] this term only                                                                                                                                                                                                                                                                                                                                                                                                                                                                                                                                                     | 0     |
| #12 | MeSH descriptor: [Middle East Respiratory Syndrome Coronavirus] explode all trees                                                                                                                                                                                                                                                                                                                                                                                                                                                                                                                             | 1     |
| #13 | MeSH descriptor: [SARS Virus] this term only                                                                                                                                                                                                                                                                                                                                                                                                                                                                                                                                                                  | 9     |
| #14 | MeSH descriptor: [Coronavirus Infections] this term only                                                                                                                                                                                                                                                                                                                                                                                                                                                                                                                                                      | 137   |
| #15 | MeSH descriptor: [Severe Acute Respiratory Syndrome] this term only                                                                                                                                                                                                                                                                                                                                                                                                                                                                                                                                           | 107   |
| #16 | ((corona* or corono*) near/1 (virus* or viral* or virinae*)) or coronavirus* or coronavirus* or coronavirinae* or Coronavirus* or Coronavirus* or Wuhan* or Hubei* or Huanan or "2019-nCoV" or 2019nCoV or nCoV2019 or "nCoV-2019" or "COVID-19" or COVID19 or "CORVID-19" or CORVID19 or "WN-CoV" or WNCov or "HCoV-19" or HCoV19 or CoV or "2019 novel*" or Ncov or "n-cov" or "SARS-CoV-2" or "SARSCoV-2" or "SARSCoV2" or "SARS-CoV2" or SARSCov19 or "SARS-Cov19" or "SARSCov-19" or "SARS-Cov-19" or Ncover or Ncorona* or Ncorono* or NcovWuhan* or NcovHubei* or NcovChina* or NcovChinese*):ti,ab,kw | 614   |
| #17 | ("severe acute respiratory syndrome" or SARS or "Middle East respiratory syndrome" or MERS):ti,ab,kw                                                                                                                                                                                                                                                                                                                                                                                                                                                                                                          | 350   |
| #18 | (betacoronavirus* or betacoronavirinae*):ti,ab,kw                                                                                                                                                                                                                                                                                                                                                                                                                                                                                                                                                             | 4     |

1  
2  
3 #19 #8 or #9 or #10 or #11 or #12 or #13 or #14 or #15 or #16 or #17 or #18 798  
4 #20 #7 and #19 3  
5

6 [all 3 results were from CENTRAL]  
7

8 Update

9 Search date: 10/06/2020

10 Re-ran search exactly as above and retrieved 5 results, all from CENTRAL. All 5 results exported to  
11 EndNote for deduplication.  
12  
13

14  
15 **Database of publications (living map of evidence) on coronavirus disease (COVID-19) developed by**  
16 **the University of Bern**  
17

18 Living Evidence on COVID-19

19 Contributors: Michel Counotte, Hira Imeri, Mert Ipekci, Nicola Low  
20  
21

22 <https://zika.ispm.unibe.ch/assets/data/pub/ncov/>  
23  
24

25 Search date: 10/05/2020 (14,988 entries)  
26

27 Search: Title, Abstract

28 Search:  
29

30 vitamin D 13  
31 vitamin D2 0  
32 vitamin D3 0  
33 ergocalciferol 0  
34 cholecalciferol 0  
35 coledalciferol 0  
36 25(OH)D 0  
37 25OHD 0  
38 25(OH)D3 0  
39 25OHD3 0  
40 hypovitaminosis D 1  
41 Vitamin D Deficiency 1  
42  
43  
44

45 **Oxford COVID-19 Evidence Service**

46 <https://www.cebm.net/oxford-covid-19-evidence-service/>

47 The Centre for Evidence-Based Medicine (CEBM) The University of Oxford  
48  
49

50 Search date: 10/05/2020 (142 articles)

51 vitamin D 1  
52 vitamin D2 0  
53 vitamin D3 0  
54 ergocalciferol 0  
55 cholecalciferol 0  
56 coledalciferol 0  
57 25(OH)D 0  
58 25OHD 0  
59  
60

1  
2  
3 25(OH)D3 0  
4 25OHD3 0  
5 hypovitaminosis D 0  
6 Vitamin D Deficiency 0  
7  
8  
9

10 **Database of publications on coronavirus disease (COVID-19) developed by WHO**

11 [https://www.who.int/emergencies/diseases/novel-coronavirus-2019/global-research-on-novel-](https://www.who.int/emergencies/diseases/novel-coronavirus-2019/global-research-on-novel-coronavirus-2019-ncov)  
12 [coronavirus-2019-ncov](https://www.who.int/emergencies/diseases/novel-coronavirus-2019/global-research-on-novel-coronavirus-2019-ncov)  
13

14 Search date: 10/05/2020 (15,253 entries)

15  
16 Search: Title, Abstract, Subject

17  
18  
19 vitamin D 19  
20 vitamin D2 0  
21 vitamin D3 2  
22 ergocalciferol 0  
23 cholecalciferol 1  
24 coilecalciferol 0  
25 25(OH)D 0  
26 25OHD 0  
27 25(OH)D3 0  
28 25OHD3 0  
29 hypovitaminosis D 1  
30 Vitamin D Deficiency 2  
31  
32

33 Total: 25

34 After de-duplication: 20  
35  
36  
37

38 **Searches for systematic reviews, for reference checking**

39  
40 **Medline**

41  
42 Search date: 19/05/2020

43 Database: Ovid MEDLINE(R) ALL <1946 to May 18, 2020>

44 Search Strategy:  
45  
46 -----

47 1 exp Vitamin D/ (58577)  
48 2 Vitamin D Deficiency/ (15588)  
49 3 (vitamin D? or vit D? or D vitamin? or ergocalciferol or cholecalciferol or coilecalciferol or  
50 calciferol or dihydroergocalciferol or sitocalciferol or dihydrotachysterol or dihydroxycholecalciferol?  
51 or hydroxycholecalciferol? or "25(OH)D?" or 25OHD? or calcidiol or hydroxyergocalciferol or  
52 alfalcidol or alphacalcidol or "1,25(OH)2D" or hydroxyvitamin D? or dihydroxyvitamin D?).ab,kf,ti.  
53 (78395)  
54 4 (paricalcitol or doxercalciferol or doxerocalciferol or calcifediol or calcitriol).ab,kf,ti. (5588)  
55 5 hypovitaminosis D?.ab,kf,ti. (1780)  
56 6 ((D or D2 or D3) adj3 supplement\*).ab,kf,ti. (12198)  
57 7 1 or 2 or 3 or 4 or 5 or 6 (92747)  
58  
59  
60

- 8 coronavirus/ or betacoronavirus/ or betacoronavirus 1/ or coronavirus oc43, human/ or middle  
east respiratory syndrome coronavirus/ or sars virus/ (8161)
- 9 coronavirus infections/ or severe acute respiratory syndrome/ (11614)
- 10 (((corona\* or corono\*) adj1 (virus\* or viral\* or virinae\*)) or coronavirus\* or coronovirus\* or  
coronavirinae\* or Coronavirus\* or Coronovirus\* or Wuhan\* or Hubei\* or Huanan or "2019-nCoV" or  
2019nCoV or nCoV2019 or "nCoV-2019" or "COVID-19" or COVID19 or "CORVID-19" or CORVID19 or  
"WN-CoV" or WNCov or "HCoV-19" or HCoV19 or CoV or "2019 novel\*" or Ncov or "n-cov" or "SARS-  
CoV-2" or "SARSCoV-2" or "SARSCoV2" or "SARS-CoV2" or SARSCov19 or "SARS-Cov19" or "SARSCov-  
19" or "SARS-Cov-19" or Ncovor or Ncorona\* or Ncorono\* or NcovWuhan\* or NcovHubei\* or  
NcovChina\* or NcovChinese\*).ab,kf,ti. (31115)
- 11 (severe acute respiratory syndrome or SARS or Middle East respiratory syndrome or  
MERS).ab,kf,ti. (17795)
- 12 (betacoronavirus\* or betacoronavirinae\*).ab,kf,ti. (294)
- 13 exp Respiratory Tract Infections/ (356696)
- 14 (acute respiratory infection\* or severe respiratory infection\* or acute respiratory tract  
infection\* or severe respiratory tract infection\* or influenza or common cold or pneumonia or  
bronchitis).ab,kf,ti. (234266)
- 15 8 or 9 or 10 or 11 or 12 or 13 or 14 (503079)
- 16 7 and 15 (1062)
- 17 (metaanalys\* or "meta analys\*" or "meta-analys\*").tw. (169008)
- 18 (systematic\* adj3 review\*).mp. (200684)
- 19 meta analysis.pt. (114746)
- 20 17 or 18 or 19 (301767)
- 21 16 and 20 (55)

## Embase

Search date: 19/05/2020

Database: Embase Classic+Embase <1947 to 2020 Week 20>

Search Strategy:

- 
- 1 exp vitamin D/ (147053)
- 2 vitamin D deficiency/ (30106)
- 3 (vitamin D? or vit D? or D vitamin? or ergocalciferol or cholecalciferol or colecalciferol or  
calciferol or dihydroergocalciferol or sitocalciferol or dihydrotachysterol or dihydroxycholecalciferol?  
or hydroxycholecalciferol? or "25(OH)D?" or 25OHD? or calcidiol or hydroxyergocalciferol or  
alfacalcidol or alphacalcidol or "1,25(OH)2D" or hydroxyvitamin D? or dihydroxyvitamin D?).ab,kw,ti.  
(118981)
- 4 (paricalcitol or doxercalciferol or doxerocalciferol or calcifediol or calcitriol).ab,kw,ti. (8485)
- 5 hypovitaminosis D?.ab,kw,ti. (3033)
- 6 ((D or D2 or D3) adj3 supplement\*).ab,kw,ti. (19335)
- 7 1 or 2 or 3 or 4 or 5 or 6 (172654)
- 8 betacoronavirus 1/ or betacoronavirus/ or human coronavirus oc43/ (1085)
- 9 Middle East respiratory syndrome coronavirus/ (2082)
- 10 sars-related coronavirus/ or sars coronavirus/ (6062)
- 11 Coronavirinae/ (2060)
- 12 coronavirus infection/ or middle east respiratory syndrome/ or severe acute respiratory  
syndrome/ (12565)

1  
2  
3 13 (((corona\* or corono\*) adj1 (virus\* or viral\* or virinae\*)) or coronavirus\* or coronavirus\* or  
4 coronavirinae\* or Coronavirus\* or Coronavirus\* or Wuhan\* or Hubei\* or Huanan or "2019-nCoV" or  
5 2019nCoV or nCoV2019 or "nCoV-2019" or "COVID-19" or COVID19 or "CORVID-19" or CORVID19 or  
6 "WN-CoV" or WNCov or "HCoV-19" or HCoV19 or CoV or "2019 novel\*" or Ncov or "n-cov" or "SARS-  
7 CoV-2" or "SARSCoV-2" or "SARSCoV2" or "SARS-CoV2" or SARSCov19 or "SARS-Cov19" or "SARSCov-  
8 19" or "SARS-Cov-19" or Ncovor or Ncorona\* or Ncorono\* or NcovWuhan\* or NcovHubei\* or  
9 NcovChina\* or NcovChinese\*).ab,kw,ti. (30532)  
10  
11 14 (severe acute respiratory syndrome or SARS or Middle East respiratory syndrome or  
12 MERS).ab,kw,ti. (17954)  
13 15 (betacoronavirus\* or betacoronavirinae\*).ab,kw,ti. (286)  
14 16 exp respiratory tract infection/ (460049)  
15 17 (acute respiratory infection\* or severe respiratory infection\* or acute respiratory tract  
16 infection\* or severe respiratory tract infection\* or influenza or common cold or pneumonia or  
17 bronchitis).ab,kw,ti. (329779)  
18 18 8 or 9 or 10 or 11 or 12 or 13 or 14 or 15 or 16 or 17 (674800)  
19 19 7 and 18 (3315)  
20 20 (metaanalys\* or "meta analys\*" or "meta-analys\*").mp. (294469)  
21 21 (systematic\* adj2 review\*).mp. (330720)  
22 22 20 or 21 (475492)  
23 23 19 and 22 (219)  
24 24 limit 19 to (meta analysis or "systematic review") (145)  
25 25 23 or 24 (219)  
26 26 limit 25 to (conference abstract or conference paper or "conference review" or editorial or  
27 letter) (41)  
28 27 25 not 26 (178)

### Cochrane Database of Systematic Reviews (Cochrane Library)

Search Name: Vitamin D Covid and Acute Respiratory Infections SRs

Date Run: 20/05/2020 18:30:28

Comment:

| ID  | Search                                                                                                                                                                                                                                                                                                                                                                                                                                              | Hits  |
|-----|-----------------------------------------------------------------------------------------------------------------------------------------------------------------------------------------------------------------------------------------------------------------------------------------------------------------------------------------------------------------------------------------------------------------------------------------------------|-------|
| #1  | MeSH descriptor: [Vitamin D] explode all trees                                                                                                                                                                                                                                                                                                                                                                                                      | 5224  |
| #2  | MeSH descriptor: [Vitamin D Deficiency] this term only                                                                                                                                                                                                                                                                                                                                                                                              | 1226  |
| #3  | ((vitamin NEXT D?) or (vit NEXT D?) or (D NEXT vitamin?) or ergocalciferol or cholecalciferol or colecalciferol or calciferol or dihydroergocalciferol or sitocalciferol or dihydrotachysterol or dihydroxycholecalciferol? or hydroxycholecalciferol? or "25(OH)D" or "25(OH)D3" or 25OHD? or calcdiol or hydroxyergocalciferol or alfalcidol or alphacalcidol or "1,25(OH)2D" or (hydroxyvitamin NEXT D?) or (dihydroxyvitamin NEXT D?)):ti,ab,kw | 12959 |
| #4  | (paricalcitol or doxercalciferol or doxerocalciferol or calcifediol or calcitriol):ti,ab,kw                                                                                                                                                                                                                                                                                                                                                         | 2417  |
| #5  | hypovitaminosis NEXT D?                                                                                                                                                                                                                                                                                                                                                                                                                             | 303   |
| #6  | ((D OR D2 OR D3) NEAR/3 supplement*):ti,ab,kw                                                                                                                                                                                                                                                                                                                                                                                                       | 5632  |
| #7  | #1 or #2 or #3 or #4 or #5 or #6                                                                                                                                                                                                                                                                                                                                                                                                                    | 14461 |
| #8  | MeSH descriptor: [Coronavirus] this term only                                                                                                                                                                                                                                                                                                                                                                                                       | 2     |
| #9  | MeSH descriptor: [Betacoronavirus] this term only                                                                                                                                                                                                                                                                                                                                                                                                   | 2     |
| #10 | MeSH descriptor: [Betacoronavirus 1] this term only                                                                                                                                                                                                                                                                                                                                                                                                 | 0     |
| #11 | MeSH descriptor: [Coronavirus OC43, Human] this term only                                                                                                                                                                                                                                                                                                                                                                                           | 0     |
| #12 | MeSH descriptor: [Middle East Respiratory Syndrome Coronavirus] explode all trees                                                                                                                                                                                                                                                                                                                                                                   | 1     |

- 1  
2  
3 #13 MeSH descriptor: [SARS Virus] this term only 9  
4 #14 MeSH descriptor: [Coronavirus Infections] this term only 137  
5 #15 MeSH descriptor: [Severe Acute Respiratory Syndrome] this term only 107  
6 #16 (((corona\* or corono\*) near/1 (virus\* or viral\* or virinae\*)) or coronavirus\* or coronavirus\*  
7 or coronavirinae\* or Coronavirus\* or Coronavirus\* or Wuhan\* or Hubei\* or Huanan or "2019-nCoV"  
8 or 2019nCoV or nCoV2019 or "nCoV-2019" or "COVID-19" or COVID19 or "CORVID-19" or CORVID19  
9 or "WN-CoV" or WNCov or "HCoV-19" or HCoV19 or CoV or "2019 novel\*" or Ncov or "n-cov" or  
10 "SARS-CoV-2" or "SARSCoV-2" or "SARSCoV2" or "SARS-CoV2" or SARSCov19 or "SARS-Cov19" or  
11 "SARSCov-19" or "SARS-Cov-19" or Ncover or Ncorona\* or Ncorono\* or NcovWuhan\* or NcovHubei\*  
12 or NcovChina\* or NcovChinese\*):ti,ab,kw 616  
13 #17 ("severe acute respiratory syndrome" or SARS or "Middle East respiratory syndrome" or  
14 MERS):ti,ab,kw 351  
15 #18 (betacoronavirus\* or betacoronavirinae\*):ti,ab,kw 4  
16 #19 MeSH descriptor: [Respiratory Tract Infections] explode all trees 14360  
17 #20 (("acute respiratory" NEXT infection\*) or ("severe respiratory" NEXT infection\*) or ("acute  
18 respiratory tract" NEXT infection\*) or ("severe respiratory tract" NEXT infection\*) or influenza or  
19 "common cold" or pneumonia or bronchitis):ti,ab,kw 25944  
20 #21 #8 or #9 or #10 or #11 or #12 or #13 or #14 or #15 or #16 or #17 or #18 or #19 or #20  
21 32554  
22 #22 #7 and #21 329  
23  
24  
25  
26

27 CDSR: 3

### 28 Expert consultation

29 One additional study identified:

30  
31  
32  
33 Martineau AR, Jolliffe DA, Hooper RL, et al., (2017) Vitamin D supplementation to prevent acute  
34 respiratory tract infections: systematic review and meta-analysis of individual participant data. BMJ.  
35 2017;356:i6583. doi:10.1136/bmj.i6583  
36  
37  
38  
39  
40  
41  
42  
43  
44  
45  
46  
47  
48  
49  
50  
51  
52  
53  
54  
55  
56  
57  
58  
59  
60

2. Full details of the study eligibility criteria

| Include                                                                                                                                                                                                                                                                                                                                                                                                                                                                                                                                                                                                                                                                                                                                                                                                                                                                                                                                                                                                                                                                                                                                                                                                                                                                                                                                                                                                                                                                                                                                        | Exclude                                                                                                                                                                                                                 |
|------------------------------------------------------------------------------------------------------------------------------------------------------------------------------------------------------------------------------------------------------------------------------------------------------------------------------------------------------------------------------------------------------------------------------------------------------------------------------------------------------------------------------------------------------------------------------------------------------------------------------------------------------------------------------------------------------------------------------------------------------------------------------------------------------------------------------------------------------------------------------------------------------------------------------------------------------------------------------------------------------------------------------------------------------------------------------------------------------------------------------------------------------------------------------------------------------------------------------------------------------------------------------------------------------------------------------------------------------------------------------------------------------------------------------------------------------------------------------------------------------------------------------------------------|-------------------------------------------------------------------------------------------------------------------------------------------------------------------------------------------------------------------------|
| <p><b>P- Population</b></p> <ol style="list-style-type: none"> <li>1) Patients acutely ill with Betacoronavirus infection [SARS-CoV, MERS-CoV, SARS-CoV-2]</li> <li>2) or at risk of acute illness with Betacoronavirus infection</li> </ol> <p><b>I – Intervention/exposure</b></p> <ol style="list-style-type: none"> <li>1) Vitamin D supplementation</li> <li>2) Low Serum Vitamin D</li> </ol> <p><b>O - Outcomes</b></p> <ol style="list-style-type: none"> <li>1) Betacoronavirus infection (to include serological evidence of infection or clinically confirmed symptomatic infection);</li> <li>2) severity of Betacoronavirus infection (to include patients admitted to hospital or admitted to intensive care); mortality due to Betacoronavirus.</li> <li>3) Mortality due to Betacoronavirus</li> </ol> <p><b>C – Comparator</b></p> <ol style="list-style-type: none"> <li>1) No Vitamin D supplementation</li> <li>2) high or normal Serum Vitamin D</li> </ol> <p><b>S - Study design</b><br/>Randomised controlled trials and non-randomized studies will be eligible for inclusion in the review including, non randomized controlled trials, interrupted time series, controlled before-and-after studies, cohort studies, ecological studies, case reports and case series.</p> <p><b>Subgroups</b></p> <ol style="list-style-type: none"> <li>1. Ethnicity characteristics (White British, All Other White, Mixed, Asian, Black, Other)</li> <li>2. Age characteristics (population by five-year age groups)</li> </ol> | <p>Animals studies, modelling studies</p> <p>Qualitative studies, Non-primary research- reviews, editorials etc, guidelines and non-systematic reviews.</p> <p>Non-English language. Non peer reviewed publication.</p> |

### 3. List of studies excluded at full text review

|    | Excluded studies                                                                                                                                                                                                                                                                                                            | Reason                                                 |
|----|-----------------------------------------------------------------------------------------------------------------------------------------------------------------------------------------------------------------------------------------------------------------------------------------------------------------------------|--------------------------------------------------------|
| 1  | Adams, K. K., et al. (2020). "Myth Busters: Dietary Supplements and COVID-19." <u>Annals of Pharmacotherapy</u> : 1060028020928052.                                                                                                                                                                                         | Study design – commentary                              |
| 2  | Ahmed, I., et al. (2020). "First Covid-19 maternal mortality in the UK associated with thrombotic complications." <u>British Journal of Haematology</u> . <b>18</b> .                                                                                                                                                       | Study design – letter                                  |
| 3  | Alpalhao, M. and P. Filipe (2020). "SARS-CoV-2 pandemic and Vitamin D deficiency - a double trouble." <u>Photodermatology, Photoimmunology &amp; Photomedicine</u> <b>01</b> : 01.                                                                                                                                          | Study design – letter                                  |
| 4  | Annweiler, C., et al. (2020). COvid-19 and Vitamin D Supplementation: a Multicenter Randomized Controlled Trial of High Dose Versus Standard Dose Vitamin D3 in High-risk COVID-19 Patients (CoVitTrial). <a href="https://clinicaltrials.gov/show/NCT04344041">https://clinicaltrials.gov/show/NCT04344041</a> .           | Study design – on-going RCT completion date. July 2020 |
| 5  | Arya, A. and V. D. Dwivedi (2020). "Synergistic effect of vitamin D and remdesivir can fight COVID-19." <u>Journal of Biomolecular Structure &amp; Dynamics</u> : 1-2                                                                                                                                                       | Study design – letter                                  |
| 6  | Banerjee, D., et al. (2020). "COVID-19 infection in kidney transplant recipients." <u>Kidney International</u> <b>97</b> (6): 1076-1082.                                                                                                                                                                                    | Study design – commentary                              |
| 7  | Caccialanza, R., et al. (2020). Early nutritional supplementation in non-critically ill patients hospitalized for the 2019 novel coronavirus disease (COVID-19): Rationale and feasibility of a shared pragmatic protocol. <u>Nutrition</u> : 110835.                                                                       | Study design - protocol                                |
| 8  | Calder, P. C., et al. (2020). Optimal Nutritional Status for a Well-Functioning Immune System Is an Important Factor to Protect against Viral Infections. <u>Nutrients</u> : <b>12</b> (4), 1181.                                                                                                                           | Study design -narrative review                         |
| 9  | Cao, Z., et al. (2020). SARS-CoV-2 & Covid-19: Key-Roles of the 'Renin-Angiotensin' System / Vitamin D Impacting Drug and Vaccine Developments. <u>Infectious Disorders - Drug Targets</u> . (E-pub Ahead of Print) DOI : <a href="https://doi.org/10.2174/1871526520999200505174704">10.2174/1871526520999200505174704</a> | Study design – editorial                               |
| 10 | Carter, S. J., et al. (2020). Considerations for obesity, vitamin D, and physical activity amidst the COVID-19 pandemic. <u>Obesity</u> <b>16</b> : 16.                                                                                                                                                                     | Study design -narrative review                         |



|    |                                                                                                                                                                                                                                                                                                              |                                                  |
|----|--------------------------------------------------------------------------------------------------------------------------------------------------------------------------------------------------------------------------------------------------------------------------------------------------------------|--------------------------------------------------|
| 11 | Daneshkhah, A., et al. (2020). The Possible Role of Vitamin D in Suppressing Cytokine Storm and Associated Mortality in COVID-19 Patients. <u>medRxiv</u> . DOI: <a href="https://doi.org/10.1101/2020.04.08.20058578">https://doi.org/10.1101/2020.04.08.20058578</a>                                       | Study design – modelling                         |
| 12 | Davies G, Garami AR, Byers JC. Evidence Supports a Causal Model for Vitamin D in COVID-19 Outcomes. <u>medRxiv</u> , 2020. DOR: <a href="https://doi.org/10.1101/2020.05.01.20087965v3">https://doi.org/10.1101/2020.05.01.20087965v3</a>                                                                    | Study design – modelling                         |
| 13 | de Lucena, T. M. C., et al. (2020). "Mechanism of inflammatory response in associated comorbidities in COVID-19." <u>Diabetes &amp; Metabolic Syndrome</u> <b>14</b> (4): 597-600.                                                                                                                           | Study design -narrative review                   |
| 14 | Eroglu, C., et al. (2019). The relation between serum vitamin D levels, viral infections and severity of attacks in children with recurrent wheezing. <u>Allergologia et Immunopathologia</u> <b>47</b> (6): 591-597.                                                                                        | Population - Not COVID-19/SARs/MERs              |
| 15 | Faul, J. L., et al. (2020). "Vitamin d deficiency and ards after sars-cov-2 infection." <u>Irish Medical Journal</u> <b>113</b> (5).                                                                                                                                                                         | Study design – letter                            |
| 16 | Ghasemian, R., et al. (2020). "The Role of Vitamin D in The Age of COVID-19: A Systematic Review and Meta-Analysis Along with an Ecological Approach." <u>MedRxiv : the Preprint Server for Health Sciences</u> . DOI: <a href="https://doi.org/10.1101/2020.06.05.20123554">10.1101/2020.06.05.20123554</a> | Study design -narrative review                   |
| 17 | Grant, W. B., et al. (2020). Evidence that Vitamin D Supplementation Could Reduce Risk of Influenza and COVID-19 Infections and Deaths. <u>Nutrients</u> <b>12</b> (4): 02.                                                                                                                                  | Study design -narrative review                   |
| 18 | Heiser, K., et al. (2020). Identification of potential treatments for COVID-19 through artificial intelligence-enabled phenomic analysis of human cells infected with SARS-CoV-2. <u>bioRxiv</u> : 2020.2004.2021.054387.                                                                                    | Study design – modelling                         |
| 19 | Hribar, C. A., et al. (2020). "Potential Role of Vitamin D in the Elderly to Resist COVID-19 and to Slow Progression of Parkinson's Disease." <u>Brain Sciences</u> <b>10</b> (5): 08.                                                                                                                       | Study design -narrative review                   |
| 20 | Jakovac, H. (2020). COVID-19 and vitamin D-Is there a link and an opportunity for intervention? <u>American Journal of Physiology - Endocrinology &amp; Metabolism</u> <b>318</b> (5): E589-E589.                                                                                                            | Study design – letter                            |
| 21 | Jamaati, H., et al. (2020). A fourteen-day experience with coronavirus disease 2019 (COVID-19) induced acute respiratory distress syndrome (ARDS): An Iranian treatment protocol. <u>Iranian Journal of Pharmaceutical Research</u> <b>19</b> (1): 31-36.                                                    | Study design – treatment protocol/recommendation |
| 22 | Kalippurayil Moozhipurath, R., et al. (2020). "Evidence of Protective Role of Ultraviolet-B (UVB) Radiation in                                                                                                                                                                                               | Exposure – not vitamin D( UVB)                   |

|    |                                                                                                                                                                                                                                                                                                           |                                             |
|----|-----------------------------------------------------------------------------------------------------------------------------------------------------------------------------------------------------------------------------------------------------------------------------------------------------------|---------------------------------------------|
|    | Reducing COVID-19 Deaths." <u>MedRxiv : the Preprint Server for Health Sciences</u> .<br>DOI 10.1101/2020.05.06.20093419                                                                                                                                                                                  |                                             |
| 23 | Kara, M., et al. (2020). "'Scientific Strabismus' or Two Related Pandemics: COVID-19 & Vitamin D Deficiency." <u>British Journal of Nutrition</u> : 1-20.                                                                                                                                                 | Study design -narrative review              |
| 24 | Koivisto, O., et al. (2020). Key Vitamin D Target Genes with Functions in the Immune System. <u>Nutrients</u> , <b>12</b> (4):1140.                                                                                                                                                                       | Population - Outcomes - target genes        |
| 25 | Kow, C. S., et al. (2020). "Vitamin D Supplementation in Influenza and COVID-19 Infections Comment on: "Evidence that Vitamin D Supplementation Could Reduce Risk of Influenza and COVID-19 Infections and Deaths" <u>Nutrients</u> 2020, 12(4), 988." <u>Nutrients</u> <b>12</b> (6): 01.                | Study design – commentary                   |
| 26 | Kumar, V. and A. Srivastava (2020). "Spurious Correlation? A review of the relationship between Vitamin D and Covid-19 infection and mortality." <u>MedRxiv : the Preprint Server for Health Sciences</u> .<br>DOI: 10.1101/2020.05.25.20110338                                                           | Study design -narrative review              |
| 27 | Laird, E., et al. (2020). "Vitamin D and inflammation: Potential implications for severity of Covid-19." <u>Irish Medical Journal</u> <b>113</b> (5).                                                                                                                                                     | Study design -narrative review              |
| 28 | La Vignera, S., et al. (2020). Sex-Specific SARS-CoV-2 Mortality: Among Hormone-Modulated ACE2 Expression, Risk of Venous Thromboembolism and Hypovitaminosis D. <u>International journal of molecular sciences</u> <b>21</b> (8):2948.                                                                   | Study design – editorial                    |
| 29 | Li, A. Y., et al. (2020). Multivariate Analysis of Factors Affecting COVID-19 Case and Death Rate in U.S. Counties: The Significant Effects of Black Race and Temperature. <u>medRxiv</u> .<br>DOI: <a href="https://doi.org/10.1101/2020.04.17.20069708">https://doi.org/10.1101/2020.04.17.20069708</a> | Intervention – not Vitamin D                |
| 30 | Maestri, E., et al. (2020). Vitamin D and coronavirus: a new field of use?. <u>Recenti Progressi in Medicina</u> <b>111</b> (4): 253-256.                                                                                                                                                                 | Study design -narrative review, non-English |
| 31 | Mansbach, J. M. and C. A. Camargo Jr., (2009). Respiratory Viruses in Bronchiolitis and Their Link to Recurrent Wheezing and Asthma. <u>Clinics in Laboratory Medicine</u> <b>29</b> (4): 741-755.                                                                                                        | Population - Not COVID-19/SARs/MERs         |
| 32 | Marik, P. E., et al. (2020). Does vitamin D status impact mortality from SARS-CoV-2 infection? <u>Medicine in Drug Discovery</u> : 100041-100041.                                                                                                                                                         | Study design - commentary                   |
| 33 | McKenna, M. J. and M. A. T. Flynn (2020). "Covid-19, cocooning and vitamin d intake requirements." <u>Irish Medical Journal</u> <b>113</b> (5).                                                                                                                                                           | Study design -narrative review              |

|    |                                                                                                                                                                                                                                                     |                                               |
|----|-----------------------------------------------------------------------------------------------------------------------------------------------------------------------------------------------------------------------------------------------------|-----------------------------------------------|
| 34 | Mitchell, F. (2020). "Vitamin-D and COVID-19: do deficient risk a poorer outcome?" <u>The Lancet Diabetes &amp; Endocrinology</u> <b>20</b> : 20.                                                                                                   | Study design -narrative review                |
| 35 | Molloy, E. J. and N. Murphy (2020). Vitamin D, Covid-19 and Children. <u>Irish Medical Journal</u> <b>113</b> (4): 64.                                                                                                                              | Study design -narrative review                |
| 36 | McCartney, D. M. and D. G. Byrne (2020). Optimisation of Vitamin D Status for Enhanced Immuno-protection Against Covid-19. <u>Irish Medical Journal</u> <b>113</b> (4): 58.                                                                         | Study design -narrative review                |
| 37 | Rabbitt, L. and E. Slattery (2020). "Vitamin d and covid-19: A note of caution." <u>Irish Medical Journal</u> <b>113</b> (5).                                                                                                                       | Study design - letter                         |
| 38 | Ribeiro, H., et al. (2020). "Does Vitamin D play a role in the management of Covid-19 in Brazil?" <u>Revista de Saude Publica</u> <b>54</b> : 53.                                                                                                   | Study design -narrative review                |
| 39 | Romano, L., et al. (2020). "Short Report - Medical nutrition therapy for critically ill patients with COVID-19." <u>European Review for Medical and Pharmacological Sciences</u> <b>24</b> (7): 4035-4039.                                          | Study design -narrative review                |
| 40 | Silberstein, M. (2020). Vitamin D: A simpler alternative to tocilizumab for trial in COVID-19? <u>Medical Hypotheses</u> <b>140</b> : 109767-109767.                                                                                                | Study design -narrative review                |
| 41 | Speeckaert, M. M. and J. R. Delanghe (2020). "Association between low vitamin D and COVID-19: don't forget the vitamin D binding protein." <u>Aging Clinical &amp; Experimental Research</u> <b>28</b> : 28.                                        | Study design - letter                         |
| 42 | Skutsch, M., et al. (2020). "The association of UV with rates of COVID-19 transmission and deaths in Mexico: the possible mediating role of vitamin D." <u>MedRxiv : the Preprint Server for Health Sciences</u> . DOI: 10.1101/2020.05.25.20112805 | Study design – modelling                      |
| 43 | Suresh, P. S. (2020). "Hypovitaminosis D and COVID-19: Matter of Concern in India?" <u>Indian Journal of Clinical Biochemistry</u> .                                                                                                                | Study design - letter                         |
| 44 | Taghizadieh, A., et al. (2020). "Acute kidney injury in pregnant women following SARS-CoV-2 infection: A case report from Iran." <u>Respiratory Medicine Case Reports</u> <b>30</b>                                                                 | Exposure – not vitamin D                      |
| 45 | Tan, S. H. S., et al. (2020). "Medications in COVID-19 patients: summarizing the current literature from an orthopaedic perspective." <u>International Orthopaedics</u> <b>22</b> : 22.                                                             | Study design -narrative review                |
| 46 | Yalaki, Z., et al. (2019). Comparison of viral agents and vitamin D levels in children with acute bronchiolitis infection. <u>Cocuk Enfeksiyon Dergisi</u> <b>13</b> (1): e14-e20.                                                                  | Population - COVID-19/SARs/MERs not specified |
| 47 | Zabetakis, I., et al. (2020). "COVID-19: The Inflammation Link and the Role of Nutrition in Potential Mitigation." <u>Nutrients</u> <b>12</b> (5): 19.                                                                                              | Study design -narrative review                |

|    |                                                                                                                                          |                           |
|----|------------------------------------------------------------------------------------------------------------------------------------------|---------------------------|
| 48 | Zemb, P., et al. (2020). "Vitamin D deficiency and COVID-19 pandemic." <u>Journal of Global Antimicrobial Resistance</u> <b>28</b> : 28. | Study design - commentary |
|----|------------------------------------------------------------------------------------------------------------------------------------------|---------------------------|

#### 4. Articles included at full text, but later excluded at time of narrative synthesis

|    | Citation record                                                                                                                                                                                                                                                                                                                                                                                                      | Exclusion reason                                             | Update performed 8 <sup>th</sup> October 2020                                                                                                                                                                    |
|----|----------------------------------------------------------------------------------------------------------------------------------------------------------------------------------------------------------------------------------------------------------------------------------------------------------------------------------------------------------------------------------------------------------------------|--------------------------------------------------------------|------------------------------------------------------------------------------------------------------------------------------------------------------------------------------------------------------------------|
| 49 | Darling, A. L., et al. (2020). Vitamin D status, body mass index, ethnicity and COVID-19: Initial analysis of the first-reported UK Biobank COVID-19 positive cases (n 580) compared with negative controls (n 723). <u>medRxiv</u> .<br><br><a href="https://www.medrxiv.org/content/10.1101/2020.04.29.20084277v1?versioned=TRUE">https://www.medrxiv.org/content/10.1101/2020.04.29.20084277v1?versioned=TRUE</a> | Not peer reviewed publication at time of narrative synthesis | No update available                                                                                                                                                                                              |
| 50 | De Smet, D., et al. (2020). Vitamin D deficiency as risk factor for severe COVID-19: a convergence of two pandemics. <u>medRxiv</u> .<br><br><a href="https://www.medrxiv.org/content/10.1101/2020.05.01.20079376v2">https://www.medrxiv.org/content/10.1101/2020.05.01.20079376v2</a>                                                                                                                               | Not peer reviewed publication at time of narrative synthesis | No update available                                                                                                                                                                                              |
| 51 | Lau, F. H., et al. (2020). Vitamin D Insufficiency is Prevalent in Severe COVID-19. <u>medRxiv</u> .<br><br><a href="https://www.medrxiv.org/content/10.1101/2020.04.24.20075838v1?versioned=TRUE">https://www.medrxiv.org/content/10.1101/2020.04.24.20075838v1?versioned=TRUE</a>                                                                                                                                  | Not peer reviewed publication at time of narrative synthesis | No update available                                                                                                                                                                                              |
| 52 | Meltzer, D. O., et al. (2020). "Association of Vitamin D Deficiency and Treatment with COVID-19 Incidence." <u>MedRxiv : the Preprint Server for Health Sciences</u> <b>13</b> : 13.                                                                                                                                                                                                                                 | Not peer reviewed public                                     | An updated publication is available at <a href="https://jamanetwork.com/journals/jama-networkopen/fullarticle/2770157">https://jamanetwork.com/journals/jama-networkopen/fullarticle/2770157</a><br><br>Citation |

|    |                                                                                                                                                                                                                                                                                                                                                                                                                                                                                               |                                                              |                                                                                                                                                                                                                                                                                                                                                                                                                                                                                                                                                                                                                                                                                                                                                                                       |
|----|-----------------------------------------------------------------------------------------------------------------------------------------------------------------------------------------------------------------------------------------------------------------------------------------------------------------------------------------------------------------------------------------------------------------------------------------------------------------------------------------------|--------------------------------------------------------------|---------------------------------------------------------------------------------------------------------------------------------------------------------------------------------------------------------------------------------------------------------------------------------------------------------------------------------------------------------------------------------------------------------------------------------------------------------------------------------------------------------------------------------------------------------------------------------------------------------------------------------------------------------------------------------------------------------------------------------------------------------------------------------------|
|    | <a href="https://www.medrxiv.org/content/10.1101/2020.05.08.20095893v1">https://www.medrxiv.org/content/10.1101/2020.05.08.20095893v1</a>                                                                                                                                                                                                                                                                                                                                                     | ation at time of narrative synthesis                         | Meltzer DO, Best TJ, Zhang H, Vokes T, Arora V, Solway J. Association of Vitamin D Status and Other Clinical Characteristics With COVID-19 Test Results. <i>JAMA Netw Open</i> . 2020;3(9):e2019722. doi:10.1001/jamanetworkopen.2020.19722                                                                                                                                                                                                                                                                                                                                                                                                                                                                                                                                           |
| 53 | Notari, A. and G. Torrieri (2020). "COVID-19 transmission risk factors." <u>MedRxiv : the Preprint Server for Health Sciences</u> .<br><br><a href="https://www.medrxiv.org/content/10.1101/2020.05.08.20095083v1?versioned=TRUE">https://www.medrxiv.org/content/10.1101/2020.05.08.20095083v1?versioned=TRUE</a>                                                                                                                                                                            | Not peer reviewed publication at time of narrative synthesis | No update available                                                                                                                                                                                                                                                                                                                                                                                                                                                                                                                                                                                                                                                                                                                                                                   |
| 54 | Raisi-Estabragh, Z., et al. (2020). "Greater risk of severe COVID-19 in non-White ethnicities is not explained by cardiometabolic, socioeconomic, or behavioural factors, or by 25(OH)-vitamin D status: study of 1,326 cases from the UK Biobank." <u>MedRxiv : the Preprint Server for Health Sciences</u> .<br><br><a href="https://www.medrxiv.org/content/10.1101/2020.06.01.20118943v1?versioned=TRUE">https://www.medrxiv.org/content/10.1101/2020.06.01.20118943v1?versioned=TRUE</a> | Not peer reviewed publication at time of narrative synthesis | An updated publication is available at <a href="https://academic.oup.com/jpubhealth/article/42/3/451/5859581">https://academic.oup.com/jpubhealth/article/42/3/451/5859581</a><br><br>Citation<br>Zahra Raisi-Estabragh, Celeste McCracken, Mae S Bethell, Jackie Cooper, Cyrus Cooper, Mark J Caulfield, Patricia B Munroe, Nicholas C Harvey, Steffen E Petersen, Greater risk of severe COVID-19 in Black, Asian and Minority Ethnic populations is not explained by cardiometabolic, socioeconomic or behavioural factors, or by 25(OH)-vitamin D status: study of 1326 cases from the UK Biobank, <i>Journal of Public Health</i> , Volume 42, Issue 3, September 2020, Pages 451–460, <a href="https://doi.org/10.1093/pubmed/fda095">https://doi.org/10.1093/pubmed/fda095</a> |
| 55 | Tan, C. W., et al. (2020). "A cohort study to evaluate the effect of combination Vitamin D, Magnesium and Vitamin B12 (DMB) on progression to severe outcome in older COVID-19 patients." <u>MedRxiv : the Preprint Server for Health Sciences</u> .<br><br><a href="https://www.medrxiv.org/content/10.1101/2020.06.01.20112334v2">https://www.medrxiv.org/content/10.1101/2020.06.01.20112334v2</a>                                                                                         | Not peer reviewed publication at time of narrative synthesis | No update available                                                                                                                                                                                                                                                                                                                                                                                                                                                                                                                                                                                                                                                                                                                                                                   |

| Study details of the seven articles included at full text, but excluded at time of narrative synthesis |                                                                                           |                                                                                                                                                                                                                                                                                                                                                                                                                                                  |                                                                                                                                                                                      |                      |                                                                                                                                                                                                                                                                                                                                                                                                                                                                                                                                             |                                                                                                                                                                                                                        |
|--------------------------------------------------------------------------------------------------------|-------------------------------------------------------------------------------------------|--------------------------------------------------------------------------------------------------------------------------------------------------------------------------------------------------------------------------------------------------------------------------------------------------------------------------------------------------------------------------------------------------------------------------------------------------|--------------------------------------------------------------------------------------------------------------------------------------------------------------------------------------|----------------------|---------------------------------------------------------------------------------------------------------------------------------------------------------------------------------------------------------------------------------------------------------------------------------------------------------------------------------------------------------------------------------------------------------------------------------------------------------------------------------------------------------------------------------------------|------------------------------------------------------------------------------------------------------------------------------------------------------------------------------------------------------------------------|
| Study                                                                                                  | Design/<br>setting                                                                        | Population                                                                                                                                                                                                                                                                                                                                                                                                                                       | Exposure/Intervention                                                                                                                                                                | Outcomes             | Results                                                                                                                                                                                                                                                                                                                                                                                                                                                                                                                                     | Limitations                                                                                                                                                                                                            |
| Darling, A. L., et al. (2020) <sup>1</sup>                                                             | Retrospective cohort study<br><br>UK Biobank England cohort only                          | COVID-19 positive cases (n 580) Mean age 57.5 (SD 9.7)<br><br>COVID-19 negative controls (n 723) Mean age 57.9 (SD 8.7)                                                                                                                                                                                                                                                                                                                          | Serum 25(OH)D status Median (IQR) nmol/L<br><br>by gender (Male/Female), body mass index (Normal/underweight, overweight, obesity), ethnicity (Asian, Black, Mixed and Other, White) | COVID-19 test result | Serum 25(OH)D status similar in both groups:<br><br>COVID-19 positive cases (median IQR) = 43.3 (32.1) nmol/L)<br><br>COVID-19 negative controls (median (IQR) 44.1 (31.2) nmol/L) for COVID-19.<br><br>A logistic regression model suggests that being overweight (OR 1.51 CI 1.13-2.02) or obese (OR 1.67 CI 1.24-2.26); living in London (OR 1.45 CI 1.05-2.00); being male (OR 1.28 CI 1.01-1.61) and being of Asian, Black or Mixed ethnicity (OR 1.66 CI 1.08-2.54) is associated with a higher odds of testing positive for COVID-19 | UK Biobank baseline samples collected in 2006-2010.                                                                                                                                                                    |
| De Smet, D., et al. (2020) <sup>2</sup>                                                                | Retrospective observational study<br><br>Central network hospital, West Flanders, Belgium | 186 SARS-CoV-2 infected patients hospitalised from March 1, 2020 to April 7, 2020<br><br>(109 males [median age 68 years, IQR 53-79] 77 females [median age 71 years, IQR 65-74])<br><br>25(OH)D in COVID-19 patients was compared a control group of 2717 patients with similar age distribution, sampled from March 1, 2019 to April 30, 2019. (999 males [median age 69 years, IQR 53-81] and 1718 females [median age 68 years, IQR 43-83]). | 25(OH)D levels                                                                                                                                                                       | SARS-CoV-2 infection | COVID-19 patients had a lower median 25(OH)D on admission (18.6 ng/mL, IQR 12.6-25.3) than controls (21.5 ng/mL, IQR 13.9-20.8, P=0.0016) and a higher percentage of vitamin D deficiency (defined as 25(OH)D < 20ng/mL): 58.6% versus 45.2% (P=0.0005).<br><br>In male COVID-19 patients, vitamin D deficiency was lower median 25(OH)D (17.6 ng/mL, IQR 12.7-24.0 versus 20.3 ng/mL, IQR 13.7-28.3, P=0.0234) and a higher deficiency rate (67.0% versus 49.2%, P=0.0006) than male controls.                                             | The prevalence and age/sex/seasonal-distribution of vitamin D status was derived from the general population sampled from 16274 consecutive, unselected and unique patients from January 1, 2019 to December 31, 2019. |



|                                                  |                                                                                                                                           |                                                                                                                                                                                                                                                                                                                  |                                                                                                                                                                                                                                                                                                                                                                                                                                                                                                                                                  |                                      |                                                                                                                                                                                                                                                                                                                                                                                                                                                                                                                                                                                                                                                                                                                                                       |                                                                                                                                                                                                                                                                                       |
|--------------------------------------------------|-------------------------------------------------------------------------------------------------------------------------------------------|------------------------------------------------------------------------------------------------------------------------------------------------------------------------------------------------------------------------------------------------------------------------------------------------------------------|--------------------------------------------------------------------------------------------------------------------------------------------------------------------------------------------------------------------------------------------------------------------------------------------------------------------------------------------------------------------------------------------------------------------------------------------------------------------------------------------------------------------------------------------------|--------------------------------------|-------------------------------------------------------------------------------------------------------------------------------------------------------------------------------------------------------------------------------------------------------------------------------------------------------------------------------------------------------------------------------------------------------------------------------------------------------------------------------------------------------------------------------------------------------------------------------------------------------------------------------------------------------------------------------------------------------------------------------------------------------|---------------------------------------------------------------------------------------------------------------------------------------------------------------------------------------------------------------------------------------------------------------------------------------|
| <p>Lau, F. H., et al. (2020)<sup>3</sup></p>     | <p>Retrospective observational study</p> <p>A single, tertiary care academic (university) medical centre, Louisiana, New Orleans, USA</p> | <p>COVID-19 ICU patients (n 13)<br/>Mean age 61.5 (SD 15.7)</p> <p>COVID-19 floor patients (n 7)<br/>Mean age 72.0 (SD 14.8)</p> <p>Medical records of COVID-19 patients between March 27, 2020 and April 21, 2020</p> <p>Vitamin D insufficiency (VDI) and COVID-19 metrics in ICU vs. floor patients</p>       | <p>VDI: defined as serum 25(OH) D &lt; 30 ng/mL</p> <p>Serum 25(OH) D status Mean (SD) ng/mL</p> <p>by gender (Male/Female), body mass index (Normal, obesity), race (African American), age (elderly&gt;65 years), hypertension</p>                                                                                                                                                                                                                                                                                                             | <p>COVID-19 metrics</p>              | <p>Overall, few significant differences were identified between ICU and floor patients: Lactate dehydrogenase was significantly higher among ICU patients (441.8 vs. 223.0, P=0.001). Also, body mass index was significantly higher among ICU patients (35.2 vs. 24.5, P=0.02).</p> <p>Among ICU subjects, 11 (84.6%) had VDI, vs. 4 (57.1%) of floor subjects. 100% of ICU patients less than 75 years old had VDI (n=11). Among these, 64.6% (n=7) had critically low 25(OH) D (&lt;20 ng/mL) and 3 had &lt;10 ng/mL.</p> <p>VDI is highly prevalent in dark-skinned people (82.1% of African Americans vs. 41.6% overall).</p> <p>Male/Female ratio was 1.24 and 1.44 for COVID-19 and VDI respectively.</p>                                      | <p>Statistical analysis was limited by the small number of subjects.</p>                                                                                                                                                                                                              |
| <p>Meltzer, D. O., et al. (2020)<sup>4</sup></p> | <p>Retrospective cohort study</p> <p>University of Chicago Medicine, USA</p>                                                              | <p>4,314 patients tested for COVID-19 from 3/3/2020 to 4/10/2020. Among these, 499 had a vitamin D level in the year before testing.</p> <p>COVID-19 positive cases with vitamin D deficient (n 178)<br/>Mean age 45.6</p> <p>COVID-19 positive cases with not vitamin D deficient (n 321)<br/>Mean age 50.7</p> | <p>Vitamin D deficiency: defined by the most recent 25(OH) D &lt;20ng/ml or 1,25-dihydroxycholecalciferol &lt;18pg/ml within 1 year before COVID-19 testing. Treatment: defined by the most recent vitamin D type and dose, and treatment changes between the time of the most recent vitamin D level and time of COVID-19 testing</p> <p>Vitamin D deficiency and treatment changes were combined to categorize vitamin D status at the time of COVID-19 testing as:<br/>1) Likely deficient (last-level-deficient/treatment-not-increased)</p> | <p>Testing positive for COVID-19</p> | <p>In multivariable analysis, testing positive for COVID-19 was associated with increasing age (RR (age&lt;50)=1.05, P&lt;0.021; RR (age≥50)=1.02, P&lt;0.064), non-white race (RR=2.54, P&lt;0.01) and being likely vitamin D deficient (deficient/treatment-not-increased: RR=1.77, P&lt;0.02) as compared to likely vitamin D sufficient (not-deficient/treatment-not-decreased), with predicted COVID-19 rates in the vitamin D deficient group of 21.6% (95%CI [14.0%-29.2%] ) vs 12.2% (95%CI [8.9%-15.4%]) in the vitamin D sufficient group.</p> <p>Vitamin D deficiency declined with increasing vitamin D dose (especially of vitamin D3). Vitamin D dose was not significantly associated with testing positive for COVID-19 (P=0.18).</p> | <p>The associations observed might not reflect causal effects of vitamin D deficiency on COVID-19. This is because vitamin D deficiency can reflect a range of chronic health conditions or behavioural factors which plausibly decrease the likelihood of treatment of vitamin D</p> |

|                                                      |                                                                                  |                                                                                                                                                                                                                                                                                                                                                 |                                                                                                                                                                                                                                                                                                                                                                                                         |                                |                                                                                                                                                                                                                                                                                                                                                                                                                                                                                                                                                                                                                                                                                                                                                                                                                                                                                                                                                                                                                                                                                                                                                                                                                                                                                 |                                                                                                                                                                                                                                                                                                       |
|------------------------------------------------------|----------------------------------------------------------------------------------|-------------------------------------------------------------------------------------------------------------------------------------------------------------------------------------------------------------------------------------------------------------------------------------------------------------------------------------------------|---------------------------------------------------------------------------------------------------------------------------------------------------------------------------------------------------------------------------------------------------------------------------------------------------------------------------------------------------------------------------------------------------------|--------------------------------|---------------------------------------------------------------------------------------------------------------------------------------------------------------------------------------------------------------------------------------------------------------------------------------------------------------------------------------------------------------------------------------------------------------------------------------------------------------------------------------------------------------------------------------------------------------------------------------------------------------------------------------------------------------------------------------------------------------------------------------------------------------------------------------------------------------------------------------------------------------------------------------------------------------------------------------------------------------------------------------------------------------------------------------------------------------------------------------------------------------------------------------------------------------------------------------------------------------------------------------------------------------------------------|-------------------------------------------------------------------------------------------------------------------------------------------------------------------------------------------------------------------------------------------------------------------------------------------------------|
|                                                      |                                                                                  |                                                                                                                                                                                                                                                                                                                                                 | <p>2)Likely sufficient (last-level-not-deficient/treatment-not-decreased)<br/>3)Uncertain deficiency (last-level-deficient/treatment-increased or last-level-not-deficient/treatment-decreased)</p> <p>by age (&lt;50, ≥50), gender (Male/Female), race (White, other than White), ethnicity (Hispanic, not Hispanic), body mass index, employee status, comorbidity indicators (e.g. hypertension)</p> |                                |                                                                                                                                                                                                                                                                                                                                                                                                                                                                                                                                                                                                                                                                                                                                                                                                                                                                                                                                                                                                                                                                                                                                                                                                                                                                                 | deficiency and increase COVID-19 risk.                                                                                                                                                                                                                                                                |
| <p>Notari, A. and G. Torrieri (2020)<sup>5</sup></p> | <p>Correlational study</p> <p>126 countries, Only 50 countries for vitamin D</p> | <p>The number of cases follows in its early stages an almost exponential expansion. A starting point in each country was chosen: the first day di with 30 cases and fitted for 12 days. Thus, capturing the early exponential growth.</p> <p>Countries with too small total population (less than 300 thousands inhabitants) were excluded.</p> | <p>They analysed risk factors correlated with the initial transmission growth rate of COVID-19</p> <p>Average annual level of serum Vitamin D and the seasonal level</p> <p>The seasonal level is defined as: the amount during March or during winter for northern hemisphere, or during summer for southern hemisphere or the annual level for countries with little seasonal variation.</p>          | <p>Growth rate of COVID-19</p> | <p>They looked for linear correlations of the exponents with other variables, for a sample of 126 countries.</p> <p>They found a positive correlation, i.e. faster spread of COVID-19, with high confidence level with the following variables, with respective p-value: low Temperature (<math>4.10^{-7}</math>), high ratio of old vs. working-age people (<math>3.10^{-6}</math>), life expectancy (<math>8.10^{-6}</math>), number of international tourists (<math>1.10^{-5}</math>), earlier epidemic starting date di (<math>2.10^{-5}</math>), high level of physical contact in greeting habits (<math>6.10^{-5}</math>), lung cancer prevalence (<math>6.10^{-5}</math>), obesity in males (<math>1.10^{-4}</math>), share of population in urban areas (<math>2.10^{-4}</math>), cancer prevalence (<math>3.10^{-4}</math>), alcohol consumption (0.0019), daily smoking prevalence (0.0036), UV index (0.004, smaller sample, 73 countries), low Vitamin D serum levels (0.002-0.006, smaller sample, 50 countries). There is highly significant correlation also with blood type. Also, positive correlation with moderate CI (p-value of 0.02-0.03) with: CO2/SO emissions, type-1 diabetes in children, and low vaccination coverage for Tuberculosis (BCG).</p> | <p>The dataset for the annual vitamin D was built with the available literature, which is quite inhomogeneous.</p> <p>The dataset for the seasonal levels is more restricted. This is because the relative literature is less complete. So, for this the authors have included only 42 countries.</p> |



|                                                 |                                                                           |                                                                                                                                                                                                                                                                                |                                                                                                                                                                                                                                                                                                                                                                                                                                                                   |                                                                                                   |                                                                                                                                                                                                                                                                                                                                                                                                                                                                                                                                                                                                                                                    |                                                                                                                                                                                                                                                                                                            |
|-------------------------------------------------|---------------------------------------------------------------------------|--------------------------------------------------------------------------------------------------------------------------------------------------------------------------------------------------------------------------------------------------------------------------------|-------------------------------------------------------------------------------------------------------------------------------------------------------------------------------------------------------------------------------------------------------------------------------------------------------------------------------------------------------------------------------------------------------------------------------------------------------------------|---------------------------------------------------------------------------------------------------|----------------------------------------------------------------------------------------------------------------------------------------------------------------------------------------------------------------------------------------------------------------------------------------------------------------------------------------------------------------------------------------------------------------------------------------------------------------------------------------------------------------------------------------------------------------------------------------------------------------------------------------------------|------------------------------------------------------------------------------------------------------------------------------------------------------------------------------------------------------------------------------------------------------------------------------------------------------------|
|                                                 |                                                                           |                                                                                                                                                                                                                                                                                |                                                                                                                                                                                                                                                                                                                                                                                                                                                                   |                                                                                                   | Vitamin D is not highly correlated with UV index due to different food consumption in different countries.                                                                                                                                                                                                                                                                                                                                                                                                                                                                                                                                         |                                                                                                                                                                                                                                                                                                            |
| Raisi-Estabragh, Z., et al. (2020) <sup>6</sup> | Retrospective cohort study<br><br>UK Biobank                              | 4,510 UK participants tested for COVID-19.<br><br>Latest data release (29/05/2020) includes test results from 16/03/2020 to 18/05/2020.<br><br>COVID-19 positive cases (n 1,326) Mean age 68.11 (SD 9.23)<br><br>COVID-19 negative controls (n 3,184) Mean age 68.91 (SD 8.72) | Serum 25(OH) D levels nmol/L<br><br>Multivariate logistic regression models by age, gender (Male/Female), ethnicity (Caucasian (any White background) and non-Caucasian: Black, Asian, Chinese) to test whether addition of: 1) cardio metabolic factors (e.g. hypertension, body mass index); 2) 25(OH)-vitamin D; 3) poor diet; 4) Townsend deprivation score; 5) housing; or 6) behavioural factors attenuated sex/ethnicity associations with COVID-19 status | COVID-19 test result<br><br>Greater risk of severe COVID-19                                       | Over-representation of men and non-White ethnicities in the COVID-19 positive group.<br><br>Non-Whites had, on average, poorer cardio metabolic profile, lower 25(OH)-vitamin D, greater material deprivation, and were more likely to live in larger households and flats.<br><br>Male sex, non-White ethnicity, higher body mass index, Townsend deprivation score, and household overcrowding were independently associated with significantly greater odds of COVID-19. The pattern of association was consistent for men and women; cardio metabolic, socio-demographic and behavioural factors did not attenuate sex/ethnicity associations. | UK Biobank baseline samples collected in 2006-2010.<br><br>Aggregating all Black and Minority Ethnic (BAME) populations into one cohort might overlook important differences between non-Caucasian ethnicities.<br><br>The current dataset does not allow assessment of specific COVID-19 health outcomes. |
| Tan, C. W., et al. (2020) <sup>7</sup>          | Cohort observational study<br><br>A tertiary academic hospital, Singapore | All 43 consecutive hospitalized COVID-19 patients aged 50 and above.<br><br>Between 15 January and 15 April 2020.                                                                                                                                                              | DMB = a single daily oral dose of vitamin D3 1000 IU, magnesium 150mg and vitamin B12 500mcg for up to 14 days<br><br>Adjusted for age, gender and comorbidities                                                                                                                                                                                                                                                                                                  | Deterioration post-DMB administration leading to any form of oxygen therapy and/or intensive care | Duration of therapy: days, Median 5 (IQR 4-7)<br><br>Significantly fewer DMB patients than controls required initiation of oxygen therapy subsequently throughout their hospitalization (17.6% vs 61.5%, P=0.006).<br><br>On univariate analysis, increasing age and presence of comorbidities were associated                                                                                                                                                                                                                                                                                                                                     | Small sample size, and the lack of systematic biologic measures to support their findings.                                                                                                                                                                                                                 |

|  |  |                                                                                                                                                |  |                                      |                                                                                                                                                                                                                                                                                                                                                                                                                 |  |
|--|--|------------------------------------------------------------------------------------------------------------------------------------------------|--|--------------------------------------|-----------------------------------------------------------------------------------------------------------------------------------------------------------------------------------------------------------------------------------------------------------------------------------------------------------------------------------------------------------------------------------------------------------------|--|
|  |  | <p>17 patients received Vitamin D, Magnesium, Vitamin B12 (DMB): Mean age 58.4 (SD 7.0)</p> <p>26 patients did not: Mean age 64.1 (SD 7.9)</p> |  | <p>support for COVID-19 patients</p> | <p>with significantly higher OR for oxygen therapy, while exposure to DMB therapy was associated with a significantly improved OR 0.13 (95% CI: 0.03 – 0.59, P=0.008) .</p> <p>On multivariate analysis, increasing age was associated with significantly higher OR for oxygen therapy, while exposure to DMB therapy was associated with a significantly improved OR 0.15 (95% CI: 0.025 – 0.93, P=0.041).</p> |  |
|--|--|------------------------------------------------------------------------------------------------------------------------------------------------|--|--------------------------------------|-----------------------------------------------------------------------------------------------------------------------------------------------------------------------------------------------------------------------------------------------------------------------------------------------------------------------------------------------------------------------------------------------------------------|--|

For peer review only

1  
2  
3  
4  
5  
6  
7  
8  
9  
10  
11  
12  
13  
14  
15  
16  
17  
18  
19  
20  
21  
22  
23  
24  
25  
26  
27  
28  
29  
30  
31  
32  
33  
34  
35  
36  
37  
38  
39  
40  
41  
42  
43  
44  
45  
46

## 5. Risk of bias of included studies

Risk of bias assessment using the Downs and Black Checklist<sup>8</sup>

| Study                              | Quality score                                                                                                                                                                 | Reviewer notes                                                                                                                                                                                                                                                                                                                                                                                                                                                                                                                                                                                                                                                                                                                                                                                                                                                                                                         |
|------------------------------------|-------------------------------------------------------------------------------------------------------------------------------------------------------------------------------|------------------------------------------------------------------------------------------------------------------------------------------------------------------------------------------------------------------------------------------------------------------------------------------------------------------------------------------------------------------------------------------------------------------------------------------------------------------------------------------------------------------------------------------------------------------------------------------------------------------------------------------------------------------------------------------------------------------------------------------------------------------------------------------------------------------------------------------------------------------------------------------------------------------------|
| Hastie et al., 2020 <sup>9</sup>   | 14/20<br><br>Seven domains were not applicable and therefore not assessed, 2 reporting, 1 external validity 3 internal validity (bias) and 1 internal validity (confounding). | <p>The study could not be scored for 3 questions as we were unable to determine; 1) the representativeness of the subjects who were prepared to participate from entire population from which they were recruited, 2) whether losses to follow-up were taken into account as patients lost to follow-up were not reported and 3) whether the study had sufficient power to detect a clinically important effect.</p> <p>The study did not score a point for 3 questions; 1) providing the number and a description of the characteristics of patients lost to follow-up, 2) stating whether study subjects in different intervention groups we recruited over the same period of time and 3) for assignment concealment as it was a non-randomised study. The study scored partially (only 1 point not two) for clearly described distributions of principal confounders in each group of subjects to be compared.</p> |
| D'Avolio et al, 2020 <sup>10</sup> | 13/15<br><br>Twelve domains were not applicable therefore not assessed, 3 reporting, 1 external validity, 4 internal validity (bias) and 4 internal validity (confounding).   | <p>The study could not be scored for the 'power' domain as we were unable to determine from the article whether the study had sufficient power to detect a clinically important effect where the probability value for a difference being due to chance is less than 5%.</p> <p>The study did not score 1 point in the 'external validity' domain as those subjects who were prepared to participate were not representative of the entire population from which they were recruited.</p>                                                                                                                                                                                                                                                                                                                                                                                                                              |
| Fasano et al., 2020 <sup>11</sup>  | 12/17<br><br>Ten domains were not applicable therefore not assessed, 3 reporting, 1 external validity, 4 internal validity (bias) and 2 internal validity (confounding).      | <p>The study could not be scored for 4 items, the 'power' domain and one question in the 'Internal validity - confounding (selection bias)' as the study did not specify the time period over which patients were recruited. It could also not be scored for 2 questions in the 'External validity domain', 1) the representativeness of the subjects asked to participate in the study compared to the entire population from which they were recruited and 2) the representativeness of those subjects who were prepared to participate compared to the entire population from which they were recruited.</p> <p>The study did not score 1 point as the effect of the main confounders was not investigated or confounding was demonstrated but no adjustment was made in the final analyses. The study scored two points for presentation of potential confounders.</p>                                             |

|                                                                                                                                                                                                                                                                                                                                                                                                                                       |                                                                                                                                                                                        |                                                                                                                                                                                                                                                                                                                                                                                                                                                                                                                                                                                                                                                                                                                                                                                                                                                                                                                                                                                                                                                                                                                                                                                                                                                                                                                                                                                                                                                                                                                                                                                                                                                                                 |
|---------------------------------------------------------------------------------------------------------------------------------------------------------------------------------------------------------------------------------------------------------------------------------------------------------------------------------------------------------------------------------------------------------------------------------------|----------------------------------------------------------------------------------------------------------------------------------------------------------------------------------------|---------------------------------------------------------------------------------------------------------------------------------------------------------------------------------------------------------------------------------------------------------------------------------------------------------------------------------------------------------------------------------------------------------------------------------------------------------------------------------------------------------------------------------------------------------------------------------------------------------------------------------------------------------------------------------------------------------------------------------------------------------------------------------------------------------------------------------------------------------------------------------------------------------------------------------------------------------------------------------------------------------------------------------------------------------------------------------------------------------------------------------------------------------------------------------------------------------------------------------------------------------------------------------------------------------------------------------------------------------------------------------------------------------------------------------------------------------------------------------------------------------------------------------------------------------------------------------------------------------------------------------------------------------------------------------|
| Ilie et al., 2020 <sup>12</sup>                                                                                                                                                                                                                                                                                                                                                                                                       | 4/20<br>Seven domains were not applicable and therefore not assessed, 1 reporting, 1 external validity, 3 internal validity (bias), 1 internal validity (confounding) and 1 for power. | <p>The study could not be scored for 9 questions. Two in the 'reporting' domain, 1) interventions of interest not clearly described, 2) the main findings of the study are not clearly described. Two 'External validity' questions 1) the representativeness of the subjects asked to participate in the study compared to the entire population from which they were recruited and 2) the representativeness of those subjects who were prepared to participate compared to the entire population from which they were recruited. Two 'Internal validity – bias' domain questions 1) all analyses that had not been planned at the outset of the study were not clearly indicated (results of the study based on "data dredging", were not made clear), and 2) it was not clear if the statistical techniques used were appropriate to the data. Three 'Internal validity - confounding (selection bias)' domain questions, 1) no information provided concerning the source of patients included in the study 2) does not specify the time period over which patients were recruited, and 3) the numbers of patients lost to follow-up are not reported.</p> <p>The study did not score 7 points for the following; 3 reporting issues 1) no description of the characteristics of participants included in the study 2) no description of the distributions of principal confounders in each group of subjects to be compared, and 3) no description of the characteristics of patients lost to follow-up. Two internal validity bias issues 1) differences in follow-up were ignored and 2) no evidence that the main measure used were accurate (valid and reliable).</p> |
| <p><b>Note:</b> For each included study, the maximum possible quality score was dependent on which domains could be assessed based on the study design. The higher the score assigned to a study, the lower the risk of bias. For example, Hastie et al. 2020<sup>9</sup> was assigned a score of 14 out of a maximum possible score of 20, suggesting good quality and therefore low risk of bias compared to the other studies.</p> |                                                                                                                                                                                        |                                                                                                                                                                                                                                                                                                                                                                                                                                                                                                                                                                                                                                                                                                                                                                                                                                                                                                                                                                                                                                                                                                                                                                                                                                                                                                                                                                                                                                                                                                                                                                                                                                                                                 |

## References

1. Darling AL, Ahmadi KR, Ward KA, et al. Vitamin D status, body mass index, ethnicity and COVID-19: initial analysis of the first-reported UK Biobank COVID-19 positive cases (n 580) compared with negative controls (n 723). *medRxiv* 2020. doi: 10.1101/2020.04.29.20084277
2. De Smet D, De Smet K, Herroelen P, Gryspeerdt S, Martens GA. Vitamin D deficiency as risk factor for severe COVID-19: a convergence of two pandemics. *medRxiv* 2020. doi: 10.1101/2020.05.01.20079376
3. Lau FH, Majumder R, Torabi R, et al. Vitamin D insufficiency is prevalent in severe COVID-19. *medRxiv* 2020. doi: 10.1101/2020.04.24.20075838

- 1
- 2
- 3
- 4 4. Meltzer DO, Best TJ, Zhang H, Vokes T, Arora V, Solway J. Association of vitamin D
- 5 deficiency and treatment with COVID-19 incidence. *medRxiv* 2020. doi:
- 6 10.1101/2020.05.08.20095893
- 7
- 8 5. Notari A, Torrieri G. COVID-19 transmission risk factors. *medRxiv* 2020. doi:
- 9 10.1101/2020.05.08.20095083
- 10
- 11 6. Raisi-Estabragh Z, McCracken C, Bethell MS, et al. Greater risk of severe COVID-19 in non-
- 12 White ethnicities is not explained by cardiometabolic, socioeconomic, or behavioural
- 13 factors, or by 25(OH)-vitamin D status: study of 1,326 cases from the UK Biobank.
- 14 *medRxiv* 2020. doi: 10.1101/2020.06.01.20118943
- 15
- 16 7. Tan CW, Ho LP, Kalimuddin S, et al. A cohort study to evaluate the effect of combination
- 17 vitamin D, magnesium and vitamin B12 (DMB) on progression to severe outcome in
- 18 older COVID-19 patients. *medRxiv* 2020. doi: 10.1101/2020.06.01.20112334
- 19
- 20 8. Downs SH, Black N. The feasibility of creating a checklist for the assessment of the
- 21 methodological quality both of randomised and non-randomised studies of health
- 22 care interventions. *J Epidemiol Community Health* 1998;52(6):377-84. doi:
- 23 10.1136/jech.52.6.377
- 24
- 25 9. Hastie CE, Mackay DF, Ho F, et al. Vitamin D concentrations and COVID-19 infection in UK
- 26 Biobank. *Diabetes Metab Syndr* 2020;14(4):561-65. doi: 10.1016/j.dsx.2020.04.050
- 27
- 28 10. D'Avolio A, Avataneo V, Manca A, et al. 25-hydroxyvitamin D concentrations are lower in
- 29 patients with positive PCR for SARS-CoV-2. *Nutrients* 2020;12(5):1359. doi:
- 30 10.3390/nu12051359
- 31
- 32 11. Fasano A, Cereda E, Barichella M, et al. COVID-19 in Parkinson's Disease Patients Living
- 33 in Lombardy, Italy. *Mov Disord* 2020. doi: 10.1002/mds.28176
- 34
- 35 12. Ilie PC, Stefanescu S, Smith L. The role of vitamin D in the prevention of coronavirus
- 36 disease 2019 infection and mortality. *Aging Clin Exp Res* 2020. doi: 10.1007/s40520-
- 37 020-01570-8
- 38
- 39
- 40
- 41
- 42
- 43
- 44
- 45
- 46
- 47
- 48
- 49
- 50
- 51
- 52
- 53
- 54
- 55
- 56
- 57
- 58
- 59
- 60



# PRISMA 2009 Checklist

| Section/topic                      | #  | Checklist item                                                                                                                                                                                                                                                                                              | Reported on page #    |
|------------------------------------|----|-------------------------------------------------------------------------------------------------------------------------------------------------------------------------------------------------------------------------------------------------------------------------------------------------------------|-----------------------|
| <b>TITLE</b>                       |    |                                                                                                                                                                                                                                                                                                             |                       |
| Title                              | 1  | Identify the report as a systematic review, meta-analysis, or both.                                                                                                                                                                                                                                         | 1                     |
| <b>ABSTRACT</b>                    |    |                                                                                                                                                                                                                                                                                                             |                       |
| Structured summary                 | 2  | Provide a structured summary including, as applicable: background; objectives; data sources; study eligibility criteria, participants, and interventions; study appraisal and synthesis methods; results; limitations; conclusions and implications of key findings; systematic review registration number. | 3                     |
| <b>INTRODUCTION</b>                |    |                                                                                                                                                                                                                                                                                                             |                       |
| Rationale                          | 3  | Describe the rationale for the review in the context of what is already known.                                                                                                                                                                                                                              | 5                     |
| Objectives                         | 4  | Provide an explicit statement of questions being addressed with reference to participants, interventions, comparisons, outcomes, and study design (PICOS).                                                                                                                                                  | 6                     |
| <b>METHODS</b>                     |    |                                                                                                                                                                                                                                                                                                             |                       |
| Protocol and registration          | 5  | Indicate if a review protocol exists, if and where it can be accessed (e.g., Web address), and, if available, provide registration information including registration number.                                                                                                                               | 6                     |
| Eligibility criteria               | 6  | Specify study characteristics (e.g., PICOS, length of follow-up) and report characteristics (e.g., years considered, language, publication status) used as criteria for eligibility, giving rationale.                                                                                                      | 7                     |
| Information sources                | 7  | Describe all information sources (e.g., databases with dates of coverage, contact with study authors to identify additional studies) in the search and date last searched.                                                                                                                                  | 6                     |
| Search                             | 8  | Present full electronic search strategy for at least one database, including any limits used, such that it could be repeated.                                                                                                                                                                               | Supp appendix 1       |
| Study selection                    | 9  | State the process for selecting studies (i.e., screening, eligibility, included in systematic review, and, if applicable, included in the meta-analysis).                                                                                                                                                   | 7 and supp appendix 2 |
| Data collection process            | 10 | Describe method of data extraction from reports (e.g., piloted forms, independently, in duplicate) and any processes for obtaining and confirming data from investigators.                                                                                                                                  | 8                     |
| Data items                         | 11 | List and define all variables for which data were sought (e.g., PICOS, funding sources) and any assumptions and simplifications made.                                                                                                                                                                       | 8                     |
| Risk of bias in individual studies | 12 | Describe methods used for assessing risk of bias of individual studies (including specification of whether this was done at the study or outcome level), and how this information is to be used in any data synthesis.                                                                                      | 8                     |



# PRISMA 2009 Checklist

Page 1 of 2

|                      |    |                                                                                                                                                                    |   |
|----------------------|----|--------------------------------------------------------------------------------------------------------------------------------------------------------------------|---|
| Summary measures     | 13 | State the principal summary measures (e.g., risk ratio, difference in means).                                                                                      | 8 |
| Synthesis of results | 14 | Describe the methods of handling data and combining results of studies, if done, including measures of consistency (e.g., I <sup>2</sup> ) for each meta-analysis. | 8 |

| Section/topic                 | #  | Checklist item                                                                                                                                                                                           | Reported on page #                  |
|-------------------------------|----|----------------------------------------------------------------------------------------------------------------------------------------------------------------------------------------------------------|-------------------------------------|
| Risk of bias across studies   | 15 | Specify any assessment of risk of bias that may affect the cumulative evidence (e.g., publication bias, selective reporting within studies).                                                             | n/a                                 |
| Additional analyses           | 16 | Describe methods of additional analyses (e.g., sensitivity or subgroup analyses, meta-regression), if done, indicating which were pre-specified.                                                         | 8                                   |
| <b>RESULTS</b>                |    |                                                                                                                                                                                                          |                                     |
| Study selection               | 17 | Give numbers of studies screened, assessed for eligibility, and included in the review, with reasons for exclusions at each stage, ideally with a flow diagram.                                          | 8                                   |
| Study characteristics         | 18 | For each study, present characteristics for which data were extracted (e.g., study size, PICOS, follow-up period) and provide the citations.                                                             | 8 and<br>supp<br>appendix<br>3      |
| Risk of bias within studies   | 19 | Present data on risk of bias of each study and, if available, any outcome level assessment (see item 12).                                                                                                | 8/9 supp<br>appendix<br>4           |
| Results of individual studies | 20 | For all outcomes considered (benefits or harms), present, for each study: (a) simple summary data for each intervention group (b) effect estimates and confidence intervals, ideally with a forest plot. | 8/9/10<br>and supp<br>appendix<br>3 |
| Synthesis of results          | 21 | Present results of each meta-analysis done, including confidence intervals and measures of consistency.                                                                                                  | n/a                                 |
| Risk of bias across studies   | 22 | Present results of any assessment of risk of bias across studies (see Item 15).                                                                                                                          | n/a                                 |
| Additional analysis           | 23 | Give results of additional analyses, if done (e.g., sensitivity or subgroup analyses, meta-regression [see Item 16]).                                                                                    | 10                                  |
| <b>DISCUSSION</b>             |    |                                                                                                                                                                                                          |                                     |
| Summary of evidence           | 24 | Summarize the main findings including the strength of evidence for each main outcome; consider their relevance to key groups (e.g., healthcare providers, users, and policy makers).                     | 11/12/13                            |
| Limitations                   | 25 | Discuss limitations at study and outcome level (e.g., risk of bias), and at review-level (e.g., incomplete retrieval of identified research, reporting bias).                                            | 13                                  |





# PRISMA 2009 Checklist

1  
2  
3  
4  
5  
6  
7  
8  
9  
10  
11  
12  
13  
14  
15  
16  
17  
18  
19  
20  
21  
22  
23  
24  
25  
26  
27  
28  
29  
30  
31  
32  
33  
34  
35  
36  
37  
38  
39  
40  
41  
42  
43  
44  
45  
46  
47

|                |    |                                                                                                                                            |       |
|----------------|----|--------------------------------------------------------------------------------------------------------------------------------------------|-------|
| Conclusions    | 26 | Provide a general interpretation of the results in the context of other evidence, and implications for future research.                    | 13/14 |
| <b>FUNDING</b> |    |                                                                                                                                            |       |
| Funding        | 27 | Describe sources of funding for the systematic review and other support (e.g., supply of data); role of funders for the systematic review. | 15    |

From: Moher D, Liberati A, Tetzlaff J, Altman DG, The PRISMA Group (2009). Preferred Reporting Items for Systematic Reviews and Meta-Analyses: The PRISMA Statement. PLoS Med 6(7): e1000097. doi:10.1371/journal.pmed1000097

For more information, visit: [www.prisma-statement.org](http://www.prisma-statement.org).

Page 2 of 2
